# Supplementary material
Source: publisher figshare collection journal article supplement (https://tandf.figshare.com/articles/dataset/_/12017856)
Supplement: Supplementary file 1 [file 3]

Archive with 2 entries (2 files):
- kepi_a_1746507_sm8753.xlsx
- kepi_a_1746507_sm7635.pdf
