# Supplementary material
Source: publisher figshare collection journal article supplement (https://tandf.figshare.com/articles/dataset/_/12017856)
Supplement: Supplementary file 1 [file 3 › kepi_a_1746507_sm8753.xlsx]

## Sheet: Table S3. Ischeamic Stroke
Table S3. Discovery stage. Ischemic stroke patients vs controls. CpG sites differentially methylated in relation to ischemic stroke. CpG id; Chr, chromosome location; genomic position; associated gene and observed mean β-values (standard deviation).
CpG	CHR	Position	Gene	CpG location	CpG class	logFC	AveExpr	t	pvalue	adj.P.Val	B
cg04077199	chr22	24989175	GGT1;C22orf36	Unclassified	Island	0.0180618	0.0792865	6.03789	3.68808e-09	0.00132295	9.19307
cg02753354	chr19	1074727	HMHA1	Promoter_Associated	Island	0.0103765	0.0543475	6.0008	4.54677e-09	0.00163097	8.98871
cg22534627	chr12	65004466	RASSF3	Promoter_Associated	Island	0.027122	0.102769	5.98402	4.99679e-09	0.00179239	8.89658
cg12928619	chr2	74648754	WDR54	Promoter_Associated	Island	0.0164884	0.0359046	5.85133	1.04621e-08	0.00375285	8.17569
cg20011051	chr10	105881722	C10orf78;C10orf78	Promoter_Associated	Island	0.0133913	0.0435424	5.83662	1.13459e-08	0.00406989	8.09662
cg08521010	chr3	179370821	USP13		Island	0.015441	0.0537192	5.73657	1.96161e-08	0.00703647	7.56313
cg16560453	chr3	101395512	ZBTB11;LOC100009676	Promoter_Associated	Island	0.0166171	0.0964053	5.73405	1.98864e-08	0.00713344	7.5498
cg22835157	chr15	41218352			Island	0.0191864	0.116126	5.71454	2.21074e-08	0.00793012	7.44669
cg14816748	chr17	74349897	PRPSAP1;PRPSAP1	Promoter_Associated	Island	0.0213558	0.0775908	5.70253	2.35925e-08	0.00846283	7.38338
cg12885832	chr12	111843885	SH2B3;SH2B3	Promoter_Associated	Island	0.039135	0.140264	5.62995	3.48674e-08	0.0125073	7.00317
cg11429664	chr15	91260578	BLM;BLM	Promoter_Associated	Island	0.0163985	0.0479714	5.60774	3.92634e-08	0.0140841	6.88765
cg17116739	chr16	67063591	CBFB;CBFB		Island	0.0378595	0.112532	5.60392	4.00718e-08	0.0143741	6.86782
cg08965276	chr16	1030586	SOX8		Island	0.0457525	0.107297	5.5829	4.482e-08	0.0160773	6.7589
cg09915769	chr19	7660977	KIAA1543;KIAA1543	Unclassified	Island	0.0256442	0.0712646	5.57818	4.59586e-08	0.0164858	6.7345
cg10423910	chr5	127420075	SLC12A2;FLJ33630		Island	0.0170965	0.080907	5.57782	4.60471e-08	0.0165175	6.73263
cg11365360	chr3	184279509	EPHB3	Unclassified	Island	0.0147193	0.0649441	5.57571	4.65676e-08	0.0167042	6.7217
cg25974903	chr1	65211057	RAVER2		Island	0.0183209	0.0693433	5.56822	4.84561e-08	0.0173816	6.68305
cg01366246	chr3	193852768	HES1	Unclassified	N_Shore	0.00981963	0.0471638	5.53339	5.82694e-08	0.0209017	6.50375
cg10671907	chr6	109703593	CD164;CD164;CD164;CD164;CD164;CD164;CD164;CD164;CD164;CD164	Promoter_Associated	Island	0.0123699	0.0264353	5.52998	5.93275e-08	0.0212813	6.48625
cg17332338	chr2	38763354		Promoter_Associated	Island	0.0192113	0.0744801	5.52587	6.06286e-08	0.021748	6.46517
cg19656070	chr17	3571978	TMEM93;TAX1BP3;TMEM93	Promoter_Associated	Island	0.0349079	0.0612552	5.52224	6.18018e-08	0.0221689	6.44654
cg00179423	chr8	145653749	VPS28;VPS28	Promoter_Associated	Island	0.0160413	0.0480201	5.51621	6.37969e-08	0.0228845	6.41566
cg04238983	chr11	65210600	MIR612	Unclassified_Cell_type_specific	OpenSea	-0.033204	0.448348	-5.51465	6.43252e-08	0.023074	6.40764
cg18030218	chr19	38865513	PSMD8	Promoter_Associated	Island	0.0181697	0.0385916	5.51113	6.55284e-08	0.0235056	6.38963
cg21957156	chr1	26372718	SLC30A2;SLC30A2	Unclassified_Cell_type_specific	Island	0.0188166	0.100935	5.51002	6.59116e-08	0.0236431	6.38396
cg15408407	chr19	1438438	RPS15	Promoter_Associated	Island	0.0402292	0.0645054	5.49833	7.00892e-08	0.0251416	6.32424
cg23108125	chr5	176882586	PRR7	Promoter_Associated	Island	0.0353783	0.0798101	5.49458	7.14866e-08	0.0256429	6.30506
cg21044426	chr19	2163593	DOT1L		N_Shore	-0.0137191	0.0783522	-5.49157	7.26226e-08	0.0260504	6.28974
cg10314752	chr14	94640828	PPP4R4;PPP4R4		Island	0.0184538	0.0720409	5.48874	7.37115e-08	0.026441	6.27528
cg17491846	chr19	19431584	KIAA0892;SF4	Promoter_Associated	Island	0.0163323	0.0471216	5.47707	7.83618e-08	0.0281091	6.21584
cg03784628	chr11	64059937	KCNK4	Unclassified_Cell_type_specific	Island	0.0198971	0.0817149	5.4538	8.8504e-08	0.0317472	6.09761
cg14971744	chr17	3627058	ITGAE;GSG2	Promoter_Associated	Island	0.0167022	0.0848066	5.45203	8.9324e-08	0.0320413	6.08866
cg06405765	chr16	30087414	PPP4C;PPP4C	Promoter_Associated	Island	0.0222624	0.041147	5.41355	1.09134e-07	0.0391473	5.89415
cg07526021	chr5	79950611	MSH3;DHFR;DHFR	Promoter_Associated	Island	0.0162326	0.0573323	5.40883	1.11837e-07	0.0401169	5.8704
cg20367329	chr17	17399941	RASD1		Island	0.0246414	0.0564189	5.40541	1.13843e-07	0.0408363	5.85314
cg08427928	chr7	32997111	FKBP9;FKBP9	Unclassified_Cell_type_specific	Island	0.0321547	0.0826491	5.40473	1.14244e-07	0.0409805	5.84972
cg08252533	chr2	238875575	UBE2F	Promoter_Associated	Island	0.0179979	0.0375296	5.39619	1.19411e-07	0.0428338	5.80679
cg17944940	chr17	73285520	SLC25A19;SLC25A19;SLC25A19;SLC25A19;SLC25A19;SLC25A19	Promoter_Associated	Island	0.0214874	0.0507949	5.39403	1.20751e-07	0.0433145	5.79595
cg11289281	chr16	4897921	GLYR1;UBN1;UBN1		Island	0.0264721	0.0863296	5.38118	1.29049e-07	0.0462912	5.73144
cg25611931	chr11	118978508	C2CD2L	Promoter_Associated	Island	0.0224123	0.0824431	5.37582	1.32666e-07	0.0475883	5.70462
cg05039463	chr14	91282525	TTC7B	Unclassified_Cell_type_specific	Island	0.0208353	0.0862703	5.37576	1.3271e-07	0.0476044	5.70429
cg03448816	chr1	28052370	FAM76A;FAM76A;FAM76A;FAM76A;FAM76A	Promoter_Associated	Island	0.0190925	0.0497154	5.37115	1.35907e-07	0.0487511	5.6812
cg05029189	chr3	123168386	ADCY5		Island	0.0263519	0.09781	5.36309	1.41672e-07	0.050819	5.64088
cg00958578	chr16	103715	SNRNP25;POLR3K	Promoter_Associated	Island	0.0282532	0.102112	5.36144	1.42882e-07	0.051253	5.63263
cg11858249	chr21	45079790	HSF2BP;RRP1B	Promoter_Associated_Cell_type_specific	Island	0.0260913	0.0511848	5.35992	1.44002e-07	0.0516548	5.62506
cg21177096	chr2	20212440	MATN3;MATN3	Unclassified_Cell_type_specific	Island	0.0214133	0.0889211	5.35915	1.4457e-07	0.0518586	5.62124
cg04910183	chr1	193090988	CDC73	Promoter_Associated	Island	0.0384502	0.0801982	5.3529	1.49295e-07	0.0535534	5.59003
cg08134342	chr12	122239035	LOC338799	Promoter_Associated	Island	0.0254555	0.0477752	5.35108	1.50703e-07	0.0540585	5.58093
cg21631583	chr3	15247517	DVWA;CAPN7	Promoter_Associated	Island	0.0156103	0.0622352	5.34833	1.52852e-07	0.0548293	5.56719
cg02089380	chr2	158732891	ACVR1;ACVR1	Promoter_Associated	OpenSea	0.0127822	0.0289313	5.33867	1.60626e-07	0.0576179	5.51907
cg14826516	chr22	50639351	SELO	Promoter_Associated	Island	0.0170708	0.0526001	5.32839	1.69316e-07	0.0607351	5.46796
cg24561572	chr17	43298813	FMNL1		Island	0.0143436	0.0518122	5.31038	1.85671e-07	0.066602	5.37853
cg16591304	chr10	115439377	CASP7;CASP7;CASP7;CASP7	Promoter_Associated_Cell_type_specific	Island	0.0125547	0.0731426	5.30676	1.89138e-07	0.0678454	5.36059
cg05232802	chr7	156742224	NOM1	Promoter_Associated	N_Shore	0.0335707	0.0963174	5.3053	1.90553e-07	0.068353	5.35336
cg00473112	chr11	507177	RNH1;RNH1;RNH1;RNH1;RNH1;RNH1;RNH1;RNH1;RNH1;RNH1;RNH1;RNH1	Promoter_Associated	Island	0.0341487	0.129257	5.30514	1.907e-07	0.068406	5.35261
cg17895236	chr17	8924740	NTN1	Unclassified	Island	0.0172461	0.0680675	5.2982	1.97577e-07	0.0708726	5.31826
cg25139493	chr1	39957400	BMP8A;BMP8A	Unclassified	Island	0.0335553	0.134507	5.29744	1.98353e-07	0.071151	5.31446
cg14397361	chr9	140149997	COBRA1	Promoter_Associated	Island	0.0233402	0.0440401	5.28676	2.09443e-07	0.0751291	5.26172
cg19271753	chr7	5396704	TNRC18	Gene_Associated_Cell_type_specific	S_Shore	0.0228985	0.575817	5.28395	2.12466e-07	0.0762133	5.24782
cg02249648	chr12	1703181	FBXL14		Island	0.0239415	0.0546773	5.28036	2.16381e-07	0.0776177	5.23012
cg08318582	chr11	109920663			OpenSea	-0.0326307	0.662137	-5.2738	2.23722e-07	0.0802511	5.19778
cg07326074	chr16	2510388	C16orf59	Promoter_Associated	Island	0.0145597	0.0537717	5.26873	2.29556e-07	0.082344	5.17283
cg01905589	chr1	26856408	RPS6KA1;RPS6KA1	Promoter_Associated	Island	0.02875	0.0641288	5.26757	2.30908e-07	0.0828289	5.16713
cg01188574	chr19	925914	ARID3A	Promoter_Associated	Island	0.0132643	0.0675813	5.26037	2.39506e-07	0.0859129	5.1317
cg24526499	chr1	155100382	EFNA1;EFNA1;EFNA1;EFNA1	Unclassified_Cell_type_specific	Island	0.0194012	0.0815367	5.25412	2.47213e-07	0.0886776	5.10101
cg06704539	chr7	102105256	ALKBH4;LRWD1	Promoter_Associated	Island	0.0194173	0.072399	5.25002	2.52409e-07	0.0905415	5.08085
cg14810343	chr5	139028149	CXXC5		Island	0.0349377	0.0631209	5.24892	2.53816e-07	0.0910462	5.07546
cg07836815	chr17	61778515	LIMD2		Island	0.0232172	0.0797926	5.24573	2.57945e-07	0.092527	5.05983
cg04627240	chr19	42746847	GSK3A	Promoter_Associated	Island	0.0184256	0.0889032	5.24394	2.6029e-07	0.0933682	5.05106
cg06618322	chr15	85923867	AKAP13;AKAP13	Promoter_Associated	Island	0.029245	0.0555668	5.23826	2.67882e-07	0.0960915	5.0232
cg00061769	chr1	155658843	YY1AP1;DAP3;DAP3;YY1AP1	Promoter_Associated	Island	0.0200373	0.0418691	5.23055	2.78522e-07	0.0999083	4.98546
cg25614222	chr11	130184756	ZBTB44	Promoter_Associated	S_Shore	0.0165406	0.10313	5.22615	2.84773e-07	0.102151	4.96396
cg04794505	chr9	128508709	PBX3;PBX3;PBX3		Island	0.0145733	0.0510734	5.22484	2.8666e-07	0.102828	4.95756
cg27007358	chr7	21467723	SP4;SP4	Promoter_Associated	Island	0.0191768	0.0803917	5.21765	2.9725e-07	0.106626	4.92242
cg21338479	chr7	101459330	CUX1;CUX1	Promoter_Associated	Island	0.0210672	0.0690545	5.21645	2.99054e-07	0.107273	4.91656
cg01854842	chr20	49547693	ADNP;ADNP	Promoter_Associated	N_Shore	0.0211497	0.0816084	5.2154	3.00632e-07	0.107839	4.91146
cg02463426	chr19	16683387	SLC35E1	Promoter_Associated	Island	0.0239109	0.0926213	5.20861	3.11095e-07	0.111592	4.87832
cg24109980	chr10	50818707	SLC18A3;SLC18A3;CHAT	Unclassified_Cell_type_specific	Island	0.0363871	0.141894	5.1985	3.27307e-07	0.117408	4.82912
cg13433446	chr9	128170534		Unclassified	Island	0.0323065	0.0547523	5.1972	3.29459e-07	0.11818	4.82277
cg26278858	chr15	40401256	BMF	Promoter_Associated	Island	0.0184321	0.052487	5.19719	3.29471e-07	0.118184	4.82273
cg14041100	chr8	61591939	CHD7	Promoter_Associated	Island	0.0193419	0.0502511	5.18453	3.51085e-07	0.125937	4.7612
cg15266508	chr20	61447742	COL9A3	Unclassified_Cell_type_specific	Island	0.0127338	0.0538912	5.18091	3.57515e-07	0.128244	4.74363
cg13716829	chr9	140196785	NRARP	Promoter_Associated	Island	0.023071	0.059308	5.1807	3.57884e-07	0.128376	4.74263
cg22512377	chr22	42475683	C22orf32	Promoter_Associated	Island	0.0325714	0.0653925	5.17883	3.61252e-07	0.129585	4.73356
cg03965340	chr16	2826984	TCEB2;TCEB2		Island	0.0140643	0.0400313	5.1756	3.67156e-07	0.131702	4.71787
cg26490949	chr13	20532080	ZMYM2;ZMYM2	Promoter_Associated	Island	0.0162783	0.0892108	5.17547	3.67377e-07	0.131781	4.71729
cg05563388	chr1	3371107	ARHGEF16	Unclassified	Island	0.0119099	0.0641928	5.17058	3.76494e-07	0.135052	4.69355
cg16887862	chr1	1243669	PUSL1;ACAP3	Unclassified	Island	0.0301593	0.0959901	5.1637	3.89669e-07	0.139778	4.66025
cg12679910	chr17	73900713	MRPL38	Promoter_Associated	Island	0.0100075	0.0433623	5.16294	3.91142e-07	0.140306	4.6566
cg17492326	chr8	124780746	FAM91A1	Promoter_Associated	Island	0.028632	0.0536399	5.1614	3.9417e-07	0.141392	4.64914
cg15700006	chr1	2160297	SKI		Island	0.0187313	0.0582445	5.15951	3.97903e-07	0.142731	4.64001
cg10398288	chr1	205561315	MFSD4	Promoter_Associated	Island	0.00768028	0.0460089	5.15697	4.02986e-07	0.144555	4.62772
cg13294594	chr19	12949443	MAST1	Unclassified	Island	0.0228354	0.0789282	5.1497	4.17877e-07	0.149896	4.5926
cg08497766	chr10	6019877	IL15RA;IL15RA;IL15RA	Promoter_Associated	Island	0.0189358	0.107809	5.14354	4.3089e-07	0.154564	4.56292
cg03231960	chr19	49139050	DBP	Promoter_Associated	Island	0.0244693	0.0492747	5.14346	4.31074e-07	0.15463	4.56251
cg19158176	chr1	1510364	SSU72	Promoter_Associated	Island	0.0153113	0.0349038	5.13798	4.42999e-07	0.158908	4.5361
cg01362605	chr22	46374836		Promoter_Associated_Cell_type_specific	Island	0.0185595	0.116273	5.13557	4.48323e-07	0.160818	4.52454
cg17524151	chr16	475494	RAB11FIP3	Promoter_Associated	Island	0.0253007	0.0762139	5.13162	4.57232e-07	0.164013	4.5055
cg09514055	chr1	43919573	HYI	Promoter_Associated	Island	0.0162984	0.0308482	5.13124	4.58086e-07	0.164319	4.50369
cg19539824	chr9	139010884	C9orf69	Promoter_Associated	Island	0.0289258	0.109547	5.12373	4.75502e-07	0.170567	4.46759
cg07331616	chr11	63933573	MACROD1;MACROD1	Promoter_Associated	Island	0.020351	0.0942489	5.1205	4.83184e-07	0.173322	4.45208
cg11199399	chr2	33172442	LTBP1	Promoter_Associated	Island	0.0161264	0.0783327	5.11861	4.87737e-07	0.174956	4.44301
cg08526825	chr16	2802229	SRRM2;LOC100128788		Island	0.0247776	0.0577009	5.11843	4.88183e-07	0.175116	4.44212
cg01332181	chr19	47290716	SLC1A5;SLC1A5	Promoter_Associated	Island	0.0279696	0.080785	5.11809	4.89017e-07	0.175415	4.44047
cg22023046	chr1	45241572	SNORD46;SNORD55;RPS8	Promoter_Associated	Island	0.0174708	0.0600538	5.11698	4.91697e-07	0.176376	4.43518
cg05319880	chr12	100536419	UHRF1BP1L;UHRF1BP1L;UHRF1BP1L;UHRF1BP1L	Promoter_Associated	Island	0.0138536	0.0727407	5.11545	4.95443e-07	0.17772	4.42784
cg25183890	chr8	94929275	PDP1;PDP1;PDP1;PDP1;PDP1;PDP1;PDP1;PDP1		Island	0.0230438	0.0537206	5.11462	4.97502e-07	0.178458	4.42383
cg09717545	chr19	917707	KISS1R	Unclassified	Island	0.0151327	0.0970895	5.11387	4.9935e-07	0.179121	4.42024
cg13468174	chr19	58919984	ZNF584	Promoter_Associated	Island	0.0284789	0.0452598	5.1127	5.02264e-07	0.180167	4.41461
cg27586682	chr1	26437624	PDIK1L;PDIK1L;PDIK1L	Promoter_Associated	Island	0.0214446	0.0437231	5.11218	5.03541e-07	0.180625	4.41215
cg01470744	chr9	134406824	UCK1;UCK1	Promoter_Associated	Island	0.0187905	0.0916595	5.11139	5.05538e-07	0.181341	4.40833
cg25498327	chr5	68389852	SLC30A5;SLC30A5;SLC30A5	Promoter_Associated	Island	0.022342	0.0703066	5.11106	5.06363e-07	0.181637	4.40675
cg25236971	chr4	17783059	FAM184B;FAM184B		Island	0.0253455	0.135248	5.10611	5.18931e-07	0.186145	4.38303
cg03960699	chr2	61697528	USP34		OpenSea	0.0105649	0.0408348	5.10319	5.26487e-07	0.188856	4.36905
cg07597763	chr11	59382877	OSBP	Promoter_Associated	Island	0.0194959	0.0847885	5.09272	5.54454e-07	0.198888	4.31898
cg13865502	chr9	140196251	NRARP		Island	0.0199341	0.0672264	5.09196	5.56561e-07	0.199643	4.31532
cg23758016	chr17	73521635	LLGL2;LLGL2;LLGL2	Unclassified	Island	0.0264369	0.106369	5.09047	5.60659e-07	0.201113	4.30822
cg16201674	chr13	95364586	SOX21		Island	0.0330889	0.180692	5.08864	5.65756e-07	0.202942	4.29947
cg23239039	chr4	4389115	D4S234E;D4S234E		Island	0.0141765	0.105971	5.08501	5.75978e-07	0.206609	4.28215
cg10306866	chr5	107716890	FBXL17		Island	0.0109724	0.0623749	5.07336	6.10045e-07	0.218829	4.22658
cg00683158	chr19	7660969	KIAA1543;KIAA1543	Unclassified	Island	0.0180089	0.0908098	5.06959	6.21455e-07	0.222922	4.20866
cg18102469	chr3	128902681	CNBP;CNBP;CNBP;CNBP;CNBP;CNBP;CNBP;CNBP;CNBP;CNBP;CNBP;CNBP	Unclassified	Island	0.0207585	0.0579893	5.0693	6.2236e-07	0.223246	4.20726
cg00590670	chr2	217559207	IGFBP5	Unclassified_Cell_type_specific	Island	0.0245684	0.0923931	5.06815	6.25874e-07	0.224507	4.20181
cg21184629	chr9	38621834	C9orf122;ANKRD18A	Promoter_Associated	Island	0.013287	0.0748416	5.06703	6.29343e-07	0.225751	4.19647
cg25142954	chr15	41245554	CHAC1;CHAC1	Promoter_Associated	Island	0.0199392	0.0656106	5.06424	6.38045e-07	0.228872	4.18319
cg00614832	chr16	73092394	ZFHX3	Unclassified	Island	0.0406833	0.139285	5.06328	6.41082e-07	0.229962	4.1786
cg20577878	chr16	66914781	PDP2	Promoter_Associated	Island	0.0129245	0.0578376	5.06193	6.45324e-07	0.231484	4.17222
cg21961583	chr2	170684455	UBR3		Island	0.0187384	0.107072	5.06094	6.48498e-07	0.232622	4.16748
cg07032309	chr8	103668104	KLF10	Promoter_Associated	Island	0.0342449	0.0696835	5.0602	6.50837e-07	0.233461	4.164
cg07899956	chr17	74261249	FAM100B	Promoter_Associated	Island	0.0299379	0.0769878	5.05954	6.52954e-07	0.23422	4.16086
cg02564536	chr10	123687158	ATE1;ATE1		Island	0.0132174	0.0618275	5.05799	6.57951e-07	0.236013	4.15349
cg10849092	chr15	40574697		Promoter_Associated_Cell_type_specific	Island	0.024027	0.0658697	5.0574	6.59869e-07	0.236701	4.15067
cg16024933	chr3	176915599	TBL1XR1	Promoter_Associated	Island	0.0143969	0.061575	5.0568	6.61801e-07	0.237394	4.14785
cg24354901	chr1	202777590	KDM5B		Island	0.0184582	0.0448857	5.05051	6.8257e-07	0.244844	4.11798
cg23493127	chr6	144164392	LTV1	Promoter_Associated	Island	0.00757416	0.0281906	5.04997	6.84398e-07	0.2455	4.11539
cg00028918	chr5	159200479		Unclassified	Island	0.0164696	0.064636	5.04158	7.1314e-07	0.25581	4.07563
cg02902761	chr17	38219410	THRA;THRA		Island	0.0119631	0.0599403	5.03654	7.30964e-07	0.262204	4.05177
cg11836132	chr6	31671343	BAT5	Promoter_Associated	S_Shore	-0.0322149	0.224269	-5.03604	7.32742e-07	0.262841	4.04942
cg13800586	chr2	242626324	DTYMK;DTYMK;DTYMK;DTYMK;DTYMK	Promoter_Associated	Island	0.0158675	0.066407	5.03527	7.35533e-07	0.263842	4.04574
cg08364767	chr15	40212176	GPR176		Island	0.0358704	0.0797086	5.03176	7.48278e-07	0.268414	4.02914
cg07061867	chr3	56716962	C3orf63	NonGene_Associated	Island	0.0272803	0.106976	5.02691	7.66255e-07	0.274862	4.0062
cg15502903	chr22	17566297	IL17RA		Island	0.0147811	0.0610029	5.0237	7.7836e-07	0.279205	3.99105
cg20962543	chr1	85666741	SYDE2	Promoter_Associated	Island	0.0136913	0.0641457	5.01742	8.02615e-07	0.287905	3.9614
cg25094927	chr22	41682102	RANGAP1;RANGAP1	Promoter_Associated	Island	0.00882386	0.0430146	5.01333	8.18787e-07	0.293706	3.94212
cg01634153	chr1	39571505	MACF1	Unclassified	Island	0.014767	0.0850684	5.01088	8.2862e-07	0.297233	3.93059
cg23962478	chr22	50354086	PIM3	Promoter_Associated	Island	0.0247239	0.0748254	5.0104	8.30576e-07	0.297935	3.92831
cg00533923	chr6	116892543	RWDD1;RWDD1;RWDD1	Promoter_Associated	Island	0.0227767	0.0569316	5.00877	8.37188e-07	0.300307	3.92065
cg25308231	chr11	120894785	TBCEL;TBCEL	Promoter_Associated	Island	0.0152732	0.0442944	5.00787	8.40873e-07	0.301629	3.91641
cg23681311	chr22	22221878	MAPK1;MAPK1;MAPK1;MAPK1	Promoter_Associated	Island	0.0429952	0.092719	5.00555	8.50427e-07	0.305056	3.90549
cg04600406	chr19	1605414	UQCR;UQCR	Promoter_Associated	Island	0.0129263	0.0759766	5.00462	8.54306e-07	0.306447	3.9011
cg13696351	chr9	140063617	LRRC26		Island	0.0342695	0.0693016	4.99226	9.07264e-07	0.325444	3.843
cg12219045	chr22	44894262	LDOC1L	Promoter_Associated	S_Shore	0.0124432	0.0339057	4.9888	9.2266e-07	0.330966	3.82674
cg04258457	chr17	62207789	ERN1		Island	0.0117235	0.0465365	4.98452	9.42042e-07	0.337919	3.80667
cg13846507	chr9	130679184	ST6GALNAC4;ST6GALNAC4;ST6GALNAC4;ST6GALNAC4	Promoter_Associated	Island	0.00737934	0.0289227	4.98289	9.49518e-07	0.340601	3.79903
cg01182555	chr14	62162064	HIF1A;HIF1A	Promoter_Associated	Island	0.0169439	0.0309916	4.98134	9.56692e-07	0.343174	3.79176
cg26151531	chr22	19842652	GNB1L;C22orf29	Promoter_Associated	Island	0.0483643	0.0815406	4.97754	9.74506e-07	0.349564	3.77394
cg20127035	chr18	42260234	SETBP1;SETBP1;SETBP1	Unclassified_Cell_type_specific	Island	0.0150458	0.0723124	4.97714	9.76406e-07	0.350246	3.77206
cg22804935	chr4	926322	TMEM175;TMEM175;GAK	Promoter_Associated	Island	0.00992386	0.0537346	4.97658	9.79083e-07	0.351206	3.76942
cg06703062	chr1	31191648	MATN1	Promoter_Associated	Island	0.021465	0.032541	4.97619	9.80898e-07	0.351857	3.76763
cg15959756	chr2	32289083	SPAST;SPAST	Promoter_Associated	Island	0.0117889	0.0490872	4.97188	1.00164e-06	0.359297	3.74742
cg08241117	chr22	24199628	SLC2A11;SLC2A11;SLC2A11	Promoter_Associated	Island	0.00829797	0.0422863	4.96976	1.01196e-06	0.362999	3.73753
cg19509894	chr19	8070923	ELAVL1	NonGene_Associated	OpenSea	0.00916449	0.0316877	4.96699	1.02563e-06	0.367902	3.72457
cg03361810	chr8	42010162	AP3M2;AP3M2	Promoter_Associated	Island	0.0416206	0.0799744	4.96573	1.03192e-06	0.370159	3.71866
cg05187833	chr6	17706939	NUP153	Promoter_Associated	Island	0.0232745	0.0497358	4.96346	1.04332e-06	0.37425	3.70805
cg04165030	chr5	175843293	CLTB;CLTB	Promoter_Associated	Island	0.017285	0.0851155	4.96249	1.04823e-06	0.376009	3.70352
cg17267676	chr19	1194783		Unclassified	Island	0.00732633	0.0501681	4.95692	1.07683e-06	0.386267	3.67754
cg12150817	chr14	24768737	DHRS1;C14orf21;DHRS1	Promoter_Associated	Island	0.0129051	0.036083	4.95602	1.08156e-06	0.387966	3.6733
cg02779230	chr1	28879417	TRNAU1AP;TRNAU1AP	Promoter_Associated	Island	0.00882992	0.0477349	4.9534	1.09534e-06	0.392908	3.66108
cg20462855	chr6	126070385	HEY2		Island	0.0180104	0.0503064	4.95332	1.09576e-06	0.39306	3.66071
cg16570019	chr20	61448188	COL9A3	Unclassified_Cell_type_specific	Island	0.021578	0.0785979	4.95106	1.10779e-06	0.397374	3.65017
cg26163374	chr17	71188695	COG1		Island	0.0123793	0.0368865	4.94998	1.11358e-06	0.399453	3.64513
cg27118809	chr22	46663960	TTC38	Promoter_Associated_Cell_type_specific	Island	0.0127048	0.0624276	4.94719	1.12865e-06	0.404857	3.63216
cg18839746	chr20	61448150	COL9A3	Unclassified_Cell_type_specific	Island	0.0104959	0.032293	4.9442	1.14505e-06	0.410738	3.61824
cg11299854	chr5	132083184	CCNI2;CCNI2	Promoter_Associated	Island	0.0398669	0.118571	4.94378	1.1474e-06	0.411584	3.61625
cg07232033	chr2	236403031	AGAP1;AGAP1;AGAP1;AGAP1		Island	0.0255733	0.116306	4.94372	1.14772e-06	0.411698	3.61598
cg07691609	chr19	662740	RNF126		Island	0.0172732	0.0749761	4.94214	1.1565e-06	0.414847	3.60863
cg20366603	chr17	7218821	GPS2	Promoter_Associated	Island	0.0164209	0.0703237	4.94133	1.16105e-06	0.416479	3.60484
cg19410789	chr1	226249811	LOC440926;H3F3A	Promoter_Associated	Island	0.0190134	0.0962073	4.93237	1.21224e-06	0.434842	3.56319
cg17255450	chr4	5710372	EVC2;EVC2		Island	0.0393355	0.0872234	4.92542	1.25348e-06	0.449633	3.53091
cg06584619	chr20	3869523	PANK2;PANK2;PANK2;PANK2	Promoter_Associated	Island	0.0160662	0.044689	4.92365	1.26423e-06	0.453489	3.52267
cg20012028	chr22	39151999	UNC84B	Promoter_Associated	Island	0.0282049	0.0636895	4.92132	1.27842e-06	0.458579	3.5119
cg17103705	chr17	26972054	KIAA0100	Promoter_Associated	Island	0.0139472	0.0387512	4.92097	1.2806e-06	0.459364	3.51025
cg03834947	chr15	65321822	MTFMT	Promoter_Associated	Island	0.0215785	0.060695	4.91597	1.31171e-06	0.470524	3.48709
cg19099833	chr1	201476290	CSRP1;CSRP1;CSRP1;CSRP1	Promoter_Associated	Island	0.0226039	0.0498172	4.91257	1.33334e-06	0.478282	3.47131
cg15504677	chr19	49521513	LHB	Promoter_Associated	Island	0.0106295	0.0324393	4.91163	1.33932e-06	0.480427	3.46699
cg06014792	chr17	7382760	ZBTB4;ZBTB4	Promoter_Associated	S_Shore	0.0182411	0.0714528	4.91142	1.34068e-06	0.480916	3.46601
cg23304339	chr19	37862045	ZNF527	Unclassified	Island	0.0109331	0.0309073	4.90788	1.36367e-06	0.489162	3.44961
cg21845957	chr14	103988428	CKB		Island	0.0494067	0.203365	4.90658	1.37215e-06	0.492202	3.44363
cg01733795	chr17	7465439	SENP3;SENP3		Island	0.0213131	0.0754194	4.9055	1.37929e-06	0.494763	3.43862
cg26578621	chr11	110583377	ARHGAP20;ARHGAP20	Unclassified	Island	0.0203849	0.05845	4.90005	1.41582e-06	0.507869	3.4134
cg07323055	chr20	3140559	FASTKD5;UBOX5;UBOX5	Promoter_Associated	Island	0.0214368	0.0754946	4.89965	1.41848e-06	0.50882	3.4116
cg13474619	chr12	131356588	RAN	Promoter_Associated	Island	0.0272922	0.0714379	4.89796	1.43003e-06	0.512966	3.40377
cg00992659	chr1	17766225	RCC2;RCC2	Promoter_Associated	S_Shore	0.0125699	0.0634445	4.89634	1.44118e-06	0.516963	3.39628
cg05032384	chr19	1138811	SBNO2		N_Shelf	-0.022337	0.779743	-4.89487	1.45133e-06	0.520607	3.38951
cg14102272	chr2	201729414	CLK1;CLK1;CLK1;CLK1;CLK1	Promoter_Associated	Island	0.00962452	0.0304409	4.894	1.45741e-06	0.522787	3.38547
cg08806699	chr1	10057970	RBP7	Unclassified_Cell_type_specific	Island	0.0239948	0.11441	4.89369	1.45955e-06	0.523555	3.38406
cg22014289	chr2	109952974	SH3RF3		OpenSea	0.0215467	0.77664	4.89339	1.46166e-06	0.524311	3.38267
cg16576049	chr14	78266708	ADCK1;ADCK1	Promoter_Associated	Island	0.0128018	0.055793	4.89217	1.47023e-06	0.527386	3.37703
cg07123227	chr8	30891112	WRN;PURG;PURG;PURG;WRN	Promoter_Associated	OpenSea	0.0181905	0.036126	4.88734	1.50454e-06	0.539693	3.35478
cg10583632	chr17	16557199	ZNF624	Promoter_Associated	Island	0.00889785	0.0473596	4.88616	1.51303e-06	0.542739	3.34935
cg16236394	chr2	113033084	ZC3H6	Promoter_Associated	Island	0.0151288	0.0402832	4.88152	1.547e-06	0.554923	3.32794
cg11891330	chr4	2010714	WHSC2	Promoter_Associated	Island	0.0127654	0.058849	4.87883	1.567e-06	0.562097	3.31555
cg00170056	chr19	37861986	ZNF527	Unclassified	Island	0.0136966	0.0690897	4.87731	1.57838e-06	0.566181	3.30857
cg06933752	chr11	64889788	FAU;MRPL49;MRPL49	Promoter_Associated	Island	0.00978754	0.0228229	4.87702	1.58054e-06	0.566953	3.30725
cg00591980	chr6	150071069	PCMT1	Promoter_Associated	Island	0.0110494	0.0443437	4.87009	1.63369e-06	0.586021	3.27535
cg11171811	chr11	65326725	LTBP3;LTBP3;LTBP3		S_Shore	-0.0243343	0.821627	-4.86953	1.63799e-06	0.587562	3.27282
cg08739576	chr7	44144360	AEBP1	Unclassified	OpenSea	0.0164821	0.0761908	4.86781	1.65153e-06	0.59242	3.26488
cg01888767	chr5	131832552		Promoter_Associated	Island	0.0122122	0.0360018	4.86674	1.65994e-06	0.595435	3.25998
cg12767834	chr20	1247058	SNPH	Unclassified_Cell_type_specific	Island	0.00945123	0.0633531	4.86383	1.68314e-06	0.603757	3.2466
cg03273509	chr18	9913806	VAPA;VAPA	Promoter_Associated	Island	0.0150334	0.0341089	4.86153	1.70161e-06	0.610382	3.23608
cg16691477	chr11	64889790	FAU;MRPL49;MRPL49	Promoter_Associated	Island	0.0169481	0.0644347	4.85974	1.71615e-06	0.615597	3.22788
cg08184047	chr17	79849980	ANAPC11;ANAPC11;ANAPC11;ANAPC11;ANAPC11;ANAPC11;ANAPC11;ANAPC11;THOC4	Promoter_Associated	Island	0.021459	0.107491	4.85711	1.7378e-06	0.623366	3.21579
cg24304618	chr18	71959402	CYB5A;CYB5A	Promoter_Associated	Island	0.0197824	0.0714899	4.85679	1.74041e-06	0.624302	3.21434
cg00359325	chr3	49377419	USP4;USP4	Promoter_Associated	Island	0.0108072	0.0650248	4.85482	1.75677e-06	0.63017	3.20532
cg03745431	chr1	226736713	C1orf95		Island	0.0245406	0.076536	4.85463	1.75842e-06	0.630763	3.20441
cg02385710	chr11	64884962	ZNHIT2	Promoter_Associated	Island	0.0136588	0.0507742	4.85411	1.76276e-06	0.632317	3.20204
cg09000178	chr16	67063319	CBFB;CBFB		Island	0.0424202	0.0827871	4.85248	1.77649e-06	0.637242	3.19456
cg00010046	chr16	88729480	MGC23284;MGC23284;MVD	Promoter_Associated	Island	0.0123168	0.0541054	4.8516	1.7839e-06	0.639901	3.19055
cg22376704	chr19	4760016		Unclassified	Island	0.0183066	0.0514688	4.85051	1.79315e-06	0.643217	3.18556
cg02182114	chr7	139876578	LOC100134229;JHDM1D		Island	0.0255997	0.135339	4.84727	1.82098e-06	0.653204	3.17071
cg05964635	chr6	15662707	DTNBP1;DTNBP1;DTNBP1	Promoter_Associated	Island	0.0106778	0.0717977	4.84629	1.82942e-06	0.656228	3.16626
cg06710900	chr3	13008958	IQSEC1;IQSEC1;IQSEC1	Promoter_Associated	Island	0.0162214	0.119098	4.8437	1.85211e-06	0.664367	3.15438
cg09281539	chr20	20693126	RALGAPA2;RALGAPA2	Promoter_Associated	Island	0.0389655	0.11312	4.84076	1.87812e-06	0.673697	3.14094
cg18652923	chr2	109745344	SH3RF3;LOC100287216		Island	0.0259891	0.0792418	4.83823	1.90079e-06	0.68183	3.12937
cg17626178	chr2	205410273	PARD3B;PARD3B;PARD3B	Unclassified_Cell_type_specific	Island	0.0280151	0.0640466	4.83766	1.90586e-06	0.683651	3.1268
cg22118131	chr15	78369834	TBC1D2B;TBC1D2B	Promoter_Associated	Island	0.0182178	0.0669734	4.83621	1.91906e-06	0.688385	3.12015
cg04355250	chr12	113796401	PLBD2;PLBD2;PLBD2;PLBD2	Promoter_Associated	Island	0.0152697	0.0748305	4.83486	1.93132e-06	0.69278	3.11401
cg05315670	chr11	64037304	BAD;BAD	Promoter_Associated	Island	0.0167657	0.0437019	4.8335	1.94384e-06	0.697272	3.10779
cg09150006	chr6	158652830			Island	0.0122152	0.0497376	4.83204	1.9573e-06	0.702103	3.10113
cg24769167	chr19	1205715	STK11	Promoter_Associated	Island	0.0139927	0.029981	4.8309	1.96795e-06	0.705922	3.0959
cg05363534	chr11	65210645	MIR612	Unclassified_Cell_type_specific	OpenSea	-0.0236827	0.415336	-4.82973	1.97888e-06	0.709843	3.09056
cg05064002	chr19	17858612	FCHO1;FCHO1;FCHO1;FCHO1	Unclassified	Island	0.013254	0.0621407	4.82729	2.00184e-06	0.718077	3.07945
cg00156744	chr5	171615663	STK10	Promoter_Associated	Island	0.0194333	0.0601364	4.82701	2.00452e-06	0.71904	3.07816
cg18565702	chr13	113241891	TUBGCP3	Promoter_Associated_Cell_type_specific	Island	0.0291189	0.0479241	4.82475	2.02599e-06	0.726741	3.06789
cg16279861	chr11	128531312			OpenSea	0.0174879	0.675465	4.82309	2.04196e-06	0.73247	3.06033
cg25858682	chr3	48481793	CCDC72;CCDC51	Promoter_Associated	Island	0.01284	0.0460061	4.82228	2.04983e-06	0.735293	3.05662
cg24079591	chr14	103851511	MARK3;MARK3;MARK3;MARK3;MARK3	Promoter_Associated	Island	0.0283185	0.0476027	4.82103	2.06201e-06	0.739661	3.05091
cg05310613	chr6	139456890	HECA		Island	0.0294421	0.0937636	4.81926	2.07934e-06	0.745877	3.04285
cg10789151	chr20	33735143	EDEM2;EDEM2;EDEM2;EDEM2;EDEM2	Promoter_Associated	Island	0.00707632	0.0395741	4.81854	2.08636e-06	0.748395	3.0396
cg16512867	chr3	136581189	NCK1	Promoter_Associated	Island	0.0245618	0.0945631	4.81403	2.13133e-06	0.764527	3.01905
cg03536846	chr8	120886254	DEPDC6	Promoter_Associated	Island	0.0178392	0.0756971	4.80946	2.17778e-06	0.781188	2.99828
cg23943801	chr12	72149029	RAB21	Unclassified	Island	0.0100646	0.0407734	4.8094	2.17838e-06	0.781406	2.99801
cg15897774	chr5	7869176	MTRR;MTRR;FASTKD3	Promoter_Associated	Island	0.0112849	0.0342928	4.80913	2.18117e-06	0.782406	2.99678
cg26775914	chr19	47852455	DHX34	Promoter_Associated	Island	0.0174483	0.0468288	4.80592	2.21438e-06	0.79432	2.98222
cg07565236	chr16	88869998	CDT1	Promoter_Associated	Island	0.0263976	0.0578696	4.80553	2.21847e-06	0.795787	2.98045
cg06982805	chr11	13690105	FAR1	Promoter_Associated	Island	0.0296786	0.0845107	4.80513	2.22272e-06	0.79731	2.9786
cg23559331	chr17	40332958	KCNH4	Promoter_Associated	Island	0.0122408	0.117586	4.80338	2.24107e-06	0.803893	2.97068
cg13398782	chr1	23857288	E2F2;E2F2	Promoter_Associated	Island	0.0169535	0.0400951	4.80331	2.24181e-06	0.804156	2.97037
cg05198094	chr17	78075597	GAA;GAA;GAA;GAA	Promoter_Associated	Island	0.0135189	0.0778076	4.80315	2.24356e-06	0.804783	2.96962
cg08667148	chr6	138188411	TNFAIP3	Promoter_Associated	Island	0.0121497	0.0453549	4.80026	2.27431e-06	0.815815	2.9565
cg00134843	chr17	76374495	PGS1	Promoter_Associated_Cell_type_specific	Island	0.0232377	0.0741854	4.79939	2.28362e-06	0.819155	2.95257
cg17368874	chr8	145743346	RECQL4;LRRC14	Promoter_Associated	Island	0.0202998	0.0389929	4.79889	2.28901e-06	0.82109	2.95029
cg10041390	chr10	89623018	PTEN;KILLIN;KILLIN	Promoter_Associated	Island	0.0157541	0.0293341	4.79831	2.29521e-06	0.823312	2.94769
cg00874357	chr12	62997129	MIRLET7I;C12orf61;C12orf61	Promoter_Associated	Island	0.0160664	0.069062	4.79749	2.30417e-06	0.826528	2.94393
cg03528784	chr6	74363598	SLC17A5		Island	0.0130998	0.0544227	4.7968	2.31163e-06	0.829203	2.94082
cg02867162	chr16	1020843	LMF1	Promoter_Associated	Island	0.0152141	0.0546482	4.79523	2.32877e-06	0.83535	2.93371
cg16246698	chr12	133263907	PXMP2;POLE;POLE	Promoter_Associated	Island	0.0169037	0.0626095	4.79389	2.3435e-06	0.840636	2.92763
cg10517474	chr16	31470676	ARMC5;ARMC5;ARMC5;ARMC5	Promoter_Associated	Island	0.0193701	0.0681449	4.79226	2.36152e-06	0.847098	2.92026
cg16044674	chr6	42981944	MEA1;KLHDC3	Promoter_Associated	Island	0.014639	0.082437	4.79207	2.3637e-06	0.847882	2.91936
cg24180066	chr19	56632673	ZNF787	Promoter_Associated	Island	0.01958	0.100113	4.79149	2.37012e-06	0.850182	2.91675
cg12425673	chr12	862975	WNK1		Island	0.0125277	0.0588972	4.79012	2.38541e-06	0.855669	2.91056
cg16968115	chr1	27560829	WDTC1	Promoter_Associated	Island	0.00962953	0.0233454	4.7896	2.39123e-06	0.857755	2.90821
cg10462093	chr12	125348448	SCARB1;SCARB1;SCARB1;SCARB1	Promoter_Associated	Island	0.0166306	0.0463872	4.78868	2.4016e-06	0.861476	2.90405
cg18282011	chr1	1590447	CDK11B;CDK11B;CDK11B;CDK11B;CDK11B;CDK11B		Island	0.00987431	0.0472029	4.78703	2.4203e-06	0.868185	2.89657
cg07813961	chr3	48956311	C3orf71;ARIH2;ARIH2	Promoter_Associated	Island	0.0154955	0.0506523	4.78694	2.4213e-06	0.868542	2.89618
cg18167715	chr1	228270190	ARF1;ARF1;ARF1;ARF1	Unclassified	Island	0.0154237	0.0344107	4.78232	2.47445e-06	0.887607	2.87527
cg01886077	chr2	98612542	TMEM131	Promoter_Associated	Island	0.0122497	0.0752488	4.78082	2.49198e-06	0.893894	2.86847
cg05970992	chr4	6785456	KIAA0232;KIAA0232	Promoter_Associated	S_Shore	0.0129628	0.0830724	4.78026	2.49847e-06	0.896223	2.86596
cg24331354	chr3	14444067	SLC6A6;SLC6A6;SLC6A6	Promoter_Associated	Island	0.0115561	0.0491913	4.77911	2.51206e-06	0.901099	2.86074
cg09122913	chr5	175875427	FAF2	Promoter_Associated	Island	0.0100168	0.057026	4.77667	2.54101e-06	0.911482	2.84971
cg08764167	chr10	103113933	BTRC;BTRC;BTRC;BTRC	Promoter_Associated	Island	0.0184001	0.0370779	4.77521	2.55843e-06	0.917733	2.84312
cg20412726	chr6	167412529	FGFR1OP;FGFR1OP	Promoter_Associated	Island	0.0112005	0.0285556	4.77505	2.56034e-06	0.918417	2.84241
cg18753480	chr1	110026701	ATXN7L2	Promoter_Associated	Island	0.0109915	0.0641404	4.76974	2.62492e-06	0.941584	2.81842
cg04266460	chr16	11348956	SOCS1	Promoter_Associated	Island	0.0388361	0.125834	4.76892	2.63492e-06	0.945171	2.81476
cg20385110	chr11	32605283	EIF3M	Promoter_Associated	Island	0.0241469	0.0580982	4.76796	2.64686e-06	0.949451	2.81041
cg16573386	chr1	1334508	CCNL2;CCNL2;LOC148413;CCNL2;CCNL2	Unclassified	Island	0.0174672	0.0590023	4.76633	2.66708e-06	0.956704	2.80308
cg06699484	chr5	132166328		Unclassified	Island	0.0173391	0.0843185	4.76584	2.67327e-06	0.958926	2.80085
cg13629563	chr1	25256949	RUNX3;RUNX3	Promoter_Associated	Island	0.00964922	0.0444186	4.76544	2.67825e-06	0.960711	2.79906
cg07831432	chr5	179125659	CANX;CANX	Promoter_Associated	Island	0.0233965	0.0474298	4.76436	2.69191e-06	0.965611	2.79416
cg17987601	chr16	30389834	2019-09-01	Promoter_Associated	Island	0.0111984	0.0791766	4.76419	2.69399e-06	0.96636	2.79341
cg14507132	chr15	57210852	TCF12;TCF12;LOC145783;TCF12;TCF12;TCF12;TCF12;TCF12;TCF12	Promoter_Associated	Island	0.0220699	0.051385	4.76414	2.69464e-06	0.96659	2.79318
cg00380464	chr6	144164650	LTV1	Promoter_Associated	Island	0.0186861	0.101513	4.76341	2.70384e-06	0.96989	2.7899
cg00799842	chr20	44563271	PCIF1	Promoter_Associated	Island	0.0193707	0.0932952	4.76282	2.71128e-06	0.972562	2.78725
cg08134053	chr2	24232856	MFSD2B	Unclassified_Cell_type_specific	Island	0.0114618	0.0573647	4.76263	2.71376e-06	0.973449	2.78638
cg07181376	chr16	58035192	C16orf57;ZNF319	Promoter_Associated	Island	0.0136787	0.081747	4.76177	2.72463e-06	0.97735	2.78253
cg20691283	chr2	66661461	MEIS1	Unclassified	Island	0.0132626	0.0554935	4.75979	2.75e-06	0.98645	2.7736
cg18496317	chr20	62205614	PRIC285	Promoter_Associated	Island	0.0176163	0.0361357	4.7573	2.78224e-06	0.998014	2.76238
cg11035174	chr17	79918527	NOTUM	Unclassified	Island	0.0138067	0.078759	4.75561	2.80427e-06	1	2.75479
cg23281075	chr1	31538727	PUM1;PUM1	Promoter_Associated	Island	0.0242657	0.100413	4.75297	2.83911e-06	1	2.7429
cg06467910	chr11	33037542	DEPDC7;DEPDC7	Promoter_Associated	Island	0.0206578	0.08026	4.75129	2.86148e-06	1	2.73535
cg26125384	chr2	70314274	PCBP1	Promoter_Associated	Island	-0.0120121	0.0818692	-4.74843	2.89999e-06	1	2.72248
cg06897927	chr10	124895500	HMX3	Unclassified	Island	0.0223821	0.0498306	4.7483	2.90175e-06	1	2.7219
cg02603366	chr20	60962040	RPS21	Unclassified	Island	0.0159221	0.0671675	4.74748	2.91283e-06	1	2.71823
cg10198271	chr20	55966838	RBM38;RBM38		Island	0.0101957	0.0445333	4.74601	2.93287e-06	1	2.71163
cg09780955	chr10	97321190	SORBS1;SORBS1	Promoter_Associated	Island	0.0129264	0.0529466	4.74451	2.95355e-06	1	2.70487
cg26705583	chr5	65017946	SGTB;NLN	Promoter_Associated	Island	0.014769	0.0759833	4.74297	2.9748e-06	1	2.69797
cg16117472	chr20	45338396	SLC2A10	Unclassified_Cell_type_specific	Island	0.0125592	0.0751888	4.74277	2.9775e-06	1	2.69709
cg23702568	chr10	88281502	WAPAL;WAPAL	Promoter_Associated	Island	0.013931	0.0742595	4.742	2.98829e-06	1	2.69362
cg20648385	chr11	72525603	ATG16L2	Promoter_Associated	Island	0.0176896	0.0665249	4.74032	3.01177e-06	1	2.68608
cg04077069	chr7	151217159	RHEB	Unclassified	Island	0.00973213	0.0585848	4.73923	3.02706e-06	1	2.68121
cg16341592	chr3	112931182	BOC		Island	0.0331506	0.0921565	4.73883	3.03275e-06	1	2.6794
cg01109287	chr10	65281299	REEP3;REEP3	Promoter_Associated	Island	0.0165602	0.0864965	4.73862	3.0358e-06	1	2.67843
cg07786668	chr16	73092391	ZFHX3	Unclassified	Island	0.0387417	0.0805074	4.73681	3.06146e-06	1	2.67033
cg11828669	chr14	64971476	ZBTB1;ZBTB25;ZBTB1;ZBTB1;ZBTB1		Island	0.0181006	0.0730891	4.73642	3.06699e-06	1	2.6686
cg17517865	chr1	112532085	KCND3;KCND3	Unclassified_Cell_type_specific	Island	0.029194	0.0733658	4.73509	3.08603e-06	1	2.66264
cg16098780	chr10	81107244	PPIF;PPIF	Promoter_Associated	Island	0.0221623	0.0466999	4.7344	3.09597e-06	1	2.65954
cg00037763	chr18	42281763	SETBP1;SETBP1		OpenSea	0.013455	0.902151	4.73345	3.10968e-06	1	2.65529
cg09353063	chr3	8811092	OXTR;OXTR	Unclassified	Island	0.0216756	0.0873819	4.73286	3.11833e-06	1	2.65262
cg05462426	chr1	3370836	ARHGEF16	Unclassified	N_Shore	0.0195879	0.11348	4.73178	3.13401e-06	1	2.64779
cg05787952	chr16	734667	JMJD8	Promoter_Associated	Island	0.0300062	0.134873	4.73133	3.14053e-06	1	2.6458
cg03607825	chr16	3074386	HCFC1R1;HCFC1R1;THOC6;HCFC1R1;THOC6	Promoter_Associated	Island	-0.00608512	0.0419692	-4.72913	3.17286e-06	1	2.63594
cg19128498	chr4	15656874	FBXL5;FBXL5;FBXL5	Promoter_Associated	Island	0.0120807	0.076595	4.72849	3.18239e-06	1	2.63305
cg11817978	chr15	75494295	C15orf39;C15orf39	Promoter_Associated	Island	0.0249427	0.0738552	4.72706	3.20361e-06	1	2.62666
cg18153322	chr1	43534145		Unclassified	Island	0.0110755	0.0805985	4.72663	3.21004e-06	1	2.62473
cg01269670	chr7	149411377	KRBA1		Island	0.0174383	0.0920271	4.72602	3.21908e-06	1	2.62202
cg02838932	chr18	12991623	CEP192	Promoter_Associated	Island	0.0115921	0.0899162	4.72564	3.2249e-06	1	2.62029
cg02484850	chr22	36783942	MYH9;MYH9	Promoter_Associated	Island	0.012405	0.0435407	4.72453	3.24148e-06	1	2.61535
cg12160011	chr6	111804095	REV3L;REV3L	Promoter_Associated	Island	0.0182486	0.0872026	4.7241	3.24795e-06	1	2.61343
cg05484788	chr20	58180357	PHACTR3		Island	0.0135532	0.102423	4.72045	3.30351e-06	1	2.59711
cg02096396	chr2	26395556	FAM59B		Island	0.0184268	0.0819407	4.71885	3.32826e-06	1	2.58993
cg14510374	chr3	50365322	TUSC2	Promoter_Associated	Island	0.0103781	0.0592268	4.7187	3.33058e-06	1	2.58926
cg04482794	chr1	226925181	ITPKB		Island	0.0157495	0.047106	4.71682	3.35974e-06	1	2.58088
cg23706268	chr13	51484060	RNASEH2B;RNASEH2B;RNASEH2B;RNASEH2B	Promoter_Associated	Island	0.022953	0.0508899	4.71664	3.36256e-06	1	2.58007
cg23456692	chr3	5229596	EDEM1	Promoter_Associated	Island	0.0122932	0.0690391	4.71452	3.39588e-06	1	2.57058
cg26563141	chr2	88124876	RGPD2;RGPD1		N_Shore	-0.0377299	0.330816	-4.7126	3.42613e-06	1	2.56205
cg19240052	chr22	42475693	C22orf32	Promoter_Associated	Island	0.0178285	0.0507661	4.71223	3.43209e-06	1	2.56038
cg06026129	chr19	822355	LPPR3	Promoter_Associated_Cell_type_specific	Island	0.0119367	0.0623052	4.71199	3.43585e-06	1	2.55932
cg22078638	chr1	207495363	CD55;CD55	Promoter_Associated	Island	0.010763	0.0562039	4.71186	3.43794e-06	1	2.55874
cg14488957	chr1	1244644	ACAP3;PUSL1		Island	0.0153158	0.0901353	4.71143	3.44485e-06	1	2.55681
cg06556397	chr1	42801023	FOXJ3	Promoter_Associated	Island	0.0104797	0.047438	4.71091	3.45318e-06	1	2.55449
cg02524531	chr22	46041485		Unclassified	Island	0.0154803	0.102248	4.71074	3.45593e-06	1	2.55372
cg26996201	chr11	77122864	PAK1;PAK1	Promoter_Associated	Island	0.0139266	0.0303543	4.71034	3.46222e-06	1	2.55197
cg06793581	chr16	46865077	C16orf87	Promoter_Associated	Island	0.019731	0.102946	4.70996	3.46837e-06	1	2.55026
cg17222234	chr15	68871405	CORO2B	Unclassified	Island	0.0210438	0.119354	4.70992	3.46903e-06	1	2.55008
cg11575912	chr19	5828299	NRTN		Island	0.0293135	0.0959824	4.70909	3.4824e-06	1	2.54638
cg23693683	chr3	46924113	PTH1R	Unclassified_Cell_type_specific	Island	0.0188309	0.116475	4.70878	3.4875e-06	1	2.54497
cg01016660	chr19	7660925	KIAA1543;KIAA1543	Unclassified	Island	0.0148858	0.101963	4.70867	3.48919e-06	1	2.54451
cg22663117	chr17	79670454	MRPL12;MRPL12	Promoter_Associated	Island	0.0105782	0.0362573	4.70801	3.49983e-06	1	2.54158
cg22871529	chr13	49550815	FNDC3A	Promoter_Associated	Island	0.0113222	0.0390033	4.70719	3.5132e-06	1	2.53791
cg09969011	chr16	29874179	LOC440356;LOC440356;CDIPT;CDIPT	Promoter_Associated	Island	0.0111084	0.0686587	4.70717	3.51362e-06	1	2.53779
cg05280148	chr16	30134882	MAPK3;MAPK3;MAPK3	Promoter_Associated	S_Shore	-0.0112342	0.0679531	-4.70697	3.51674e-06	1	2.53694
cg22164238	chr1	110162488	AMPD2;AMPD2;AMPD2	Promoter_Associated	Island	0.0154267	0.0526258	4.70646	3.5252e-06	1	2.53463
cg04158069	chr22	50982905		Unclassified_Cell_type_specific	Island	0.0108282	0.0636932	4.70583	3.5354e-06	1	2.53185
cg04280480	chr22	46547117	PPARA;PPARA		Island	0.0204553	0.0832571	4.70472	3.55369e-06	1	2.52689
cg20863756	chr12	6809797	C12orf53;C12orf53	Unclassified	Island	0.0189647	0.139807	4.70376	3.56953e-06	1	2.52261
cg22594055	chr5	131832675		Promoter_Associated	Island	0.0122598	0.0537579	4.70317	3.57935e-06	1	2.51997
cg07806715	chr19	48018254	NAPA;NAPA	Promoter_Associated	Island	0.0186305	0.10076	4.70305	3.58128e-06	1	2.51945
cg17629793	chr19	42580205	ZNF574	Promoter_Associated	Island	0.0114054	0.0468484	4.70176	3.60278e-06	1	2.51369
cg24097153	chr12	122231765	RHOF	Promoter_Associated	Island	0.016911	0.0522164	4.70176	3.60279e-06	1	2.51369
cg14955151	chr17	73874635	TRIM47;TRIM47		Island	0.0212222	0.139622	4.70173	3.60321e-06	1	2.51358
cg08503002	chr3	183903768	ABCF3	Promoter_Associated	Island	0.0140939	0.0627616	4.70018	3.62917e-06	1	2.50667
cg03371770	chr2	96932024	CIAO1;CIAO1;TMEM127	Promoter_Associated	Island	0.020983	0.0518381	4.69708	3.6817e-06	1	2.49285
cg11287851	chr11	119187772	MCAM		Island	0.0160871	0.0422685	4.6969	3.68465e-06	1	2.49208
cg11474864	chr18	60263588			Island	0.0285822	0.174061	4.69657	3.69039e-06	1	2.49058
cg14616479	chr3	155588124	GMPS	Promoter_Associated	Island	0.017448	0.075226	4.69521	3.71366e-06	1	2.48454
cg07857181	chr6	43543548	POLH;XPO5	Promoter_Associated	Island	0.0111823	0.0665443	4.69362	3.741e-06	1	2.47748
cg11776676	chr19	54693755	MBOAT7;MBOAT7;MBOAT7;MBOAT7;TSEN34;TSEN34	Promoter_Associated	Island	-0.0115301	0.0718003	-4.69237	3.76264e-06	1	2.47194
cg09977800	chr17	80477464	FOXK2	Promoter_Associated	Island	0.0268576	0.160151	4.69045	3.79623e-06	1	2.46339
cg07987587	chr22	42486991	NDUFA6	Promoter_Associated	Island	0.0301944	0.0456518	4.69037	3.79772e-06	1	2.46301
cg08676905	chr10	6019609	IL15RA;IL15RA	Promoter_Associated	Island	0.0161955	0.0666742	4.69016	3.8014e-06	1	2.46208
cg21273013	chr1	23670943	HNRNPR;HNRNPR;HNRNPR;HNRNPR	Promoter_Associated	Island	0.0243925	0.0716941	4.68953	3.81244e-06	1	2.45929
cg07359545	chr22	19711327	GP1BB;SEPT5	Unclassified_Cell_type_specific	Island	0.0118197	0.0724467	4.68935	3.81562e-06	1	2.45849
cg26462404	chr19	2270807	OAZ1	Promoter_Associated	Island	0.0110845	0.0672953	4.68862	3.82859e-06	1	2.45523
cg09216375	chr1	8378378		Unclassified	Island	0.016886	0.0878173	4.68711	3.85538e-06	1	2.44852
cg02767296	chr19	45505053	RELB	Promoter_Associated	Island	-0.0126661	0.0602285	-4.68531	3.88754e-06	1	2.44054
cg24130926	chr2	128643992		Promoter_Associated_Cell_type_specific	Island	0.0139235	0.0844561	4.68237	3.94068e-06	1	2.42748
cg17425567	chr19	36422583		Promoter_Associated	Island	0.0112263	0.0433363	4.68226	3.94261e-06	1	2.42701
cg26538931	chr16	2073293		Unclassified	N_Shelf	0.0112361	0.0359163	4.67812	4.0187e-06	1	2.40863
cg15420687	chr5	159546321	PWWP2A;PWWP2A	Promoter_Associated	Island	0.0183764	0.0936397	4.67805	4.01994e-06	1	2.40833
cg00745962	chr18	5296141	ZFP161;ZFP161;ZFP161	Promoter_Associated	Island	0.0216805	0.0610483	4.67767	4.027e-06	1	2.40665
cg11656992	chr17	79818741	P4HB	Promoter_Associated	Island	0.0164202	0.0561031	4.67743	4.03148e-06	1	2.40558
cg14157244	chr2	170655474	SSB;SSB	Promoter_Associated	Island	0.0139381	0.0549915	4.67622	4.054e-06	1	2.40022
cg06915334	chr8	20161343		Unclassified_Cell_type_specific	Island	0.0116786	0.0928062	4.67396	4.09649e-06	1	2.3902
cg05313261	chr16	30134350	MAPK3;MAPK3;MAPK3	Promoter_Associated	Island	-0.0148473	0.0922679	-4.67175	4.13836e-06	1	2.38042
cg23343073	chr11	65360449	KCNK7;KCNK7;KCNK7;KCNK7		S_Shore	-0.0232747	0.810522	-4.6712	4.14885e-06	1	2.37799
cg20632873	chr1	155948126	ARHGEF2;ARHGEF2;ARHGEF2	Promoter_Associated	Island	0.0131567	0.0340418	4.67108	4.1512e-06	1	2.37744
cg23141825	chr1	226111974	PYCR2	Promoter_Associated	Island	0.0200407	0.0631242	4.67039	4.16444e-06	1	2.37438
cg16757658	chr11	126138769	SRPR;FOXRED1	Unclassified	Island	0.0096319	0.0265656	4.66846	4.20156e-06	1	2.36585
cg00476037	chr2	70781307	TGFA;TGFA	Promoter_Associated	Island	0.0154103	0.08443	4.66793	4.21179e-06	1	2.36351
cg05266843	chr8	95961618	TP53INP1;TP53INP1	Promoter_Associated	Island	0.0215433	0.0877136	4.66705	4.22893e-06	1	2.35961
cg15048802	chr2	200820651	C2orf60;C2orf60;C2orf47	Promoter_Associated	Island	0.0243202	0.0696721	4.66613	4.24688e-06	1	2.35554
cg06364629	chr2	27592939	EIF2B4;SNX17;EIF2B4;EIF2B4	Promoter_Associated	Island	0.0231909	0.040842	4.66434	4.28194e-06	1	2.34763
cg23267944	chr2	232329239	NCL	Promoter_Associated	Island	0.00883501	0.0461141	4.66341	4.30046e-06	1	2.34349
cg16869008	chr8	145550615	DGAT1	Promoter_Associated	Island	0.0184303	0.0713681	4.6632	4.30442e-06	1	2.3426
cg12075970	chr12	122064387	ORAI1	Promoter_Associated	Island	0.026405	0.104467	4.66228	4.32276e-06	1	2.33851
cg08272151	chr5	150036071	SYNPO	Promoter_Associated	Island	0.0082143	0.0462945	4.66198	4.32877e-06	1	2.33718
cg05105845	chr14	55369781	GCH1;GCH1;GCH1;GCH1	Promoter_Associated	Island	0.0142902	0.0312241	4.66047	4.35898e-06	1	2.33049
cg10726394	chr6	157098467	ARID1B;ARID1B;ARID1B	Promoter_Associated	OpenSea	0.0126056	0.0299863	4.65684	4.43218e-06	1	2.31449
cg11016194	chr1	42501599		Promoter_Associated	Island	0.016895	0.10514	4.6552	4.46585e-06	1	2.30721
cg07619799	chr4	185747409	ACSL1		Island	0.0183908	0.0573199	4.65426	4.485e-06	1	2.3031
cg26873439	chr20	49126821	PTPN1	Unclassified	Island	0.0226823	0.0394261	4.6541	4.48828e-06	1	2.3024
cg00294419	chr3	23244681	UBE2E2	Promoter_Associated	Island	0.0175635	0.122475	4.65314	4.50819e-06	1	2.29814
cg00581979	chr19	47778059	PRR24	Promoter_Associated	Island	-0.0294604	0.126955	-4.65314	4.50829e-06	1	2.29812
cg18766912	chr15	25683909	UBE3A;UBE3A		Island	0.0419288	0.122006	4.65282	4.51481e-06	1	2.29673
cg05256242	chr12	12876945			Island	0.0157933	0.0884655	4.65009	4.57183e-06	1	2.28467
cg13961784	chr1	48175246		Unclassified	Island	0.0144968	0.105527	4.65003	4.57296e-06	1	2.28443
cg24578966	chr4	84457523	AGPAT9	Promoter_Associated_Cell_type_specific	Island	0.0145211	0.0732178	4.64994	4.57501e-06	1	2.284
cg08174462	chr12	56709715	CNPY2;CNPY2	Promoter_Associated	Island	0.0129666	0.0677667	4.64803	4.61519e-06	1	2.2756
cg19185384	chr13	45914939	LOC100190939;TPT1	Promoter_Associated	Island	0.0135563	0.0744362	4.64722	4.63227e-06	1	2.27205
cg27619163	chr17	7982806	ALOX12B	Unclassified	Island	0.0288392	0.0614892	4.64415	4.69797e-06	1	2.25852
cg04759220	chr5	78532560	JMY		Island	0.0281715	0.072834	4.64414	4.69817e-06	1	2.25848
cg13841901	chr1	45805975	MUTYH;TOE1;MUTYH;MUTYH;MUTYH;MUTYH;MUTYH;MUTYH;MUTYH;MUTYH	Promoter_Associated	Island	0.0146209	0.0383762	4.64321	4.71832e-06	1	2.25436
cg25487903	chr19	10828950	DNM2;DNM2;DNM2;MIR638;DNM2	Promoter_Associated	Island	0.0136931	0.0845372	4.64268	4.72983e-06	1	2.25202
cg21741689	chr3	128327189		Unclassified	Island	0.0112882	0.0563845	4.64042	4.77895e-06	1	2.24209
cg11053496	chr14	53019545	TXNDC16;TXNDC16;GPR137C	Promoter_Associated	Island	0.0114956	0.0311556	4.63884	4.8137e-06	1	2.23513
cg08201152	chr19	1875879		Promoter_Associated	Island	0.012158	0.0696818	4.6376	4.8412e-06	1	2.22966
cg05874561	chr4	154709828	SFRP2	Unclassified_Cell_type_specific	Island	0.0166175	0.0724658	4.63748	4.84391e-06	1	2.22912
cg10488476	chr17	48133676	ITGA3;ITGA3;ITGA3;ITGA3	Unclassified	Island	0.0112878	0.0598536	4.63683	4.85828e-06	1	2.22628
cg20083107	chr8	12523148		Unclassified	Island	0.0167045	0.0640863	4.63667	4.86173e-06	1	2.22559
cg10675120	chr10	75532504	FUT11	Promoter_Associated	Island	0.0111254	0.0693916	4.63401	4.92132e-06	1	2.21389
cg04357830	chr21	36261693	RUNX1;RUNX1;RUNX1		Island	0.0160679	0.0711129	4.63068	4.99686e-06	1	2.19925
cg01062691	chr16	11763141	SNN	Promoter_Associated	Island	0.0149926	0.10836	4.63011	5.01e-06	1	2.19673
cg05090127	chr16	1350789		Unclassified	OpenSea	0.0157069	0.0885622	4.62733	5.07412e-06	1	2.18451
cg10724442	chr19	40971809	SPTBN4;BLVRB	Promoter_Associated	Island	0.00852075	0.0238549	4.62679	5.08653e-06	1	2.18217
cg16458021	chr21	43430507	ZNF295;ZNF295;ZNF295	Promoter_Associated	Island	0.0130481	0.0314052	4.62609	5.1029e-06	1	2.17908
cg07314414	chr2	128784923	SAP130;SAP130	Promoter_Associated	Island	0.0103607	0.0528224	4.62533	5.12064e-06	1	2.17575
cg23011817	chr6	33422290	ZBTB9	Promoter_Associated	Island	0.00860172	0.0308002	4.62533	5.12074e-06	1	2.17573
cg09643587	chr3	107809710	CD47;CD47;CD47		Island	0.0403783	0.134718	4.62358	5.16178e-06	1	2.16806
cg13559099	chr11	62554740	TMEM179B;TAF6L	Promoter_Associated	Island	0.013888	0.0610556	4.6217	5.2062e-06	1	2.15983
cg17630771	chr11	101981004	YAP1;YAP1		Island	0.0211716	0.078837	4.6209	5.22526e-06	1	2.15632
cg10632229	chr1	226250431	H3F3A;LOC440926;H3F3A	Promoter_Associated	Island	0.0125211	0.0675508	4.61971	5.25377e-06	1	2.15109
cg00208412	chr10	99609481	GOLGA7B		Island	0.0088738	0.0295826	4.61968	5.25458e-06	1	2.15094
cg26224725	chr7	74489898	WBSCR16	Promoter_Associated	Island	0.012226	0.0489695	4.61893	5.27253e-06	1	2.14767
cg11252792	chr3	125932053			Island	0.0135093	0.089563	4.61757	5.30546e-06	1	2.14169
cg05914439	chr17	34958381	MRM1	Promoter_Associated	Island	0.0174103	0.0695657	4.61689	5.32188e-06	1	2.13872
cg16979622	chr17	79196755	AZI1;AZI1	Promoter_Associated	Island	0.0140117	0.0941813	4.61566	5.35189e-06	1	2.13332
cg25962774	chr5	176831364	F12	Promoter_Associated	Island	0.0164173	0.0692552	4.61507	5.36625e-06	1	2.13074
cg03607359	chr5	176057465	SNCB;SNCB;EIF4E1B;SNCB;SNCB	Unclassified	Island	0.0160865	0.0425921	4.61474	5.37432e-06	1	2.1293
cg20152841	chr19	2073190	MOBKL2A		N_Shelf	-0.0211367	0.656762	-4.61429	5.38524e-06	1	2.12735
cg26212924	chr8	145150439	CYC1	Promoter_Associated	Island	0.0105878	0.0469536	4.61188	5.44473e-06	1	2.1168
cg02349096	chr19	11450198	RAB3D;RAB3D	Promoter_Associated	Island	0.00804011	0.0419842	4.61169	5.44952e-06	1	2.11596
cg23795178	chr22	40053168	CACNA1I;CACNA1I	Promoter_Associated	OpenSea	0.0243629	0.253565	4.60993	5.49346e-06	1	2.10824
cg15736296	chr11	57335454	UBE2L6;UBE2L6	Promoter_Associated	Island	0.0136847	0.0328467	4.60984	5.49557e-06	1	2.10787
cg03638940	chr12	58149384	2019-03-09	Promoter_Associated	Island	0.0143385	0.123686	4.60915	5.51298e-06	1	2.10484
cg04004437	chr18	21242479	ANKRD29	Unclassified	Island	0.0159881	0.104107	4.60694	5.5689e-06	1	2.09514
cg26325335	chr3	50402333	CACNA2D2;CACNA2D2	Promoter_Associated	Island	0.0467397	0.204247	4.60675	5.57353e-06	1	2.09434
cg25984791	chr11	108535797	DDX10	Promoter_Associated	Island	0.0149886	0.0794479	4.60515	5.61424e-06	1	2.08736
cg01575096	chr2	238969261	SCLY	Promoter_Associated	Island	0.0112371	0.067537	4.60405	5.6426e-06	1	2.08252
cg14153722	chr1	206858799	MAPKAPK2;MAPKAPK2	Promoter_Associated	Island	0.0120851	0.0411222	4.60393	5.64556e-06	1	2.08201
cg13615187	chr1	205313385	KLHDC8A	Unclassified_Cell_type_specific	Island	0.0112256	0.0919908	4.60317	5.66516e-06	1	2.07869
cg07789552	chr1	36851195	STK40	Promoter_Associated	Island	0.012517	0.0763359	4.6029	5.67217e-06	1	2.0775
cg14797438	chr18	9615155	PPP4R1;PPP4R1		OpenSea	0.00936841	0.0727852	4.602	5.69532e-06	1	2.07359
cg12815987	chr14	91719608	GPR68	Promoter_Associated	Island	0.0187564	0.0849232	4.60135	5.71238e-06	1	2.07072
cg16229180	chr19	1103746	GPX4;GPX4;GPX4	Promoter_Associated	Island	0.0166395	0.075155	4.59917	5.76927e-06	1	2.0612
cg10122932	chr7	99698990	MCM7;MCM7;MCM7;AP4M1		Island	0.0207075	0.069876	4.59892	5.77571e-06	1	2.06013
cg24256946	chr19	796991	PTBP1;PTBP1;PTBP1;PTBP1	Promoter_Associated	Island	0.010671	0.0990408	4.59815	5.79598e-06	1	2.05676
cg25703784	chr6	33255181	WDR46;WDR46		N_Shore	-0.0215837	0.817117	-4.59634	5.84395e-06	1	2.04885
cg04665180	chr9	132934972	FREQ		N_Shore	0.014716	0.0566353	4.59581	5.85806e-06	1	2.04653
cg21957546	chr15	66790095	SNAPC5;SNAPC5	Promoter_Associated	Island	0.00846689	0.0494986	4.59461	5.89016e-06	1	2.04129
cg21100497	chr10	93668770	FGFBP3	Promoter_Associated	Island	0.010442	0.0542589	4.59423	5.90013e-06	1	2.03966
cg06011334	chr6	73973128	KHDC1	Promoter_Associated_Cell_type_specific	S_Shore	0.0166738	0.0799552	4.59367	5.9152e-06	1	2.03721
cg27383975	chr19	17356182	NR2F6		Island	0.0146053	0.072028	4.59302	5.93279e-06	1	2.03436
cg02067430	chr17	79679069	SLC25A10	Unclassified	Island	0.0119906	0.0433837	4.59223	5.9541e-06	1	2.03092
cg12585429	chr16	49889252		Unclassified_Cell_type_specific	Island	0.0235975	0.0652147	4.59193	5.96234e-06	1	2.02959
cg19949929	chr17	2304007	MNT;MNT	Promoter_Associated	Island	0.0233876	0.0557819	4.59172	5.96806e-06	1	2.02867
cg03732936	chr1	224371029	DEGS1;DEGS1;DEGS1;DEGS1	Promoter_Associated	Island	0.0215079	0.0876595	4.59152	5.97347e-06	1	2.0278
cg25072436	chr2	30454560	LBH;LBH	Promoter_Associated	Island	0.0140369	0.0443526	4.59132	5.97873e-06	1	2.02696
cg26376809	chr3	179370824	USP13		Island	0.00736368	0.0237574	4.59115	5.9833e-06	1	2.02622
cg10295360	chr17	73874699	TRIM47		Island	0.0166147	0.0905477	4.59077	5.99373e-06	1	2.02455
cg26599209	chr5	156692972	CYFIP2;CYFIP2	Promoter_Associated	Island	0.022674	0.0539753	4.59049	6.00131e-06	1	2.02334
cg10250355	chr22	43045158	CYB5R3	Promoter_Associated	Island	0.00892674	0.0415189	4.58888	6.04525e-06	1	2.01634
cg16883533	chr12	7079667	PHB2;EMG1;PHB2	Promoter_Associated	Island	0.00922356	0.0832747	4.58757	6.08148e-06	1	2.0106
cg13655563	chr17	1132368			Island	0.0177201	0.0549282	4.58748	6.08389e-06	1	2.01022
cg22035166	chr7	42951793	C7orf25;C7orf25	Promoter_Associated	Island	0.0204348	0.0396017	4.58748	6.08398e-06	1	2.0102
cg18108507	chr3	51975897	RRP9;RRP9;PARP3;PARP3	Promoter_Associated	Island	0.00826676	0.0567085	4.58687	6.10072e-06	1	2.00757
cg01963056	chr8	144911482	PUF60;PUF60;PUF60;PUF60;PUF60	Promoter_Associated	Island	0.00901167	0.030897	4.58606	6.12329e-06	1	2.00402
cg07310282	chr17	1627701	WDR81;WDR81;WDR81;WDR81	Promoter_Associated	N_Shore	0.0083468	0.0652544	4.58476	6.15956e-06	1	1.99835
cg26336164	chr19	4791680	FEM1A	Promoter_Associated	Island	0.0110003	0.0408692	4.58128	6.25744e-06	1	1.98322
cg23783768	chr10	45454944	RASSF4	Promoter_Associated	Island	0.00872341	0.0300027	4.58102	6.26485e-06	1	1.98208
cg00142624	chr12	117627897	FBXO21;FBXO21	Promoter_Associated	Island	0.0131816	0.0423153	4.58043	6.28156e-06	1	1.97952
cg01446164	chr11	2421746		Promoter_Associated	Island	0.0149407	0.0534916	4.5775	6.36564e-06	1	1.96676
cg11744351	chr13	30424153	UBL3;UBL3		Island	0.0179316	0.0568626	4.57734	6.37033e-06	1	1.96605
cg02892486	chr9	137028920		Unclassified	Island	0.00923437	0.0502628	4.57721	6.37406e-06	1	1.96549
cg25910466	chr20	21283998	XRN2;XRN2	Promoter_Associated	Island	0.0365088	0.0621434	4.57674	6.38767e-06	1	1.96344
cg01025283	chr3	138327728	FAIM;FAIM;FAIM;FAIM;FAIM;FAIM;FAIM	Promoter_Associated	Island	0.0167308	0.0684653	4.57577	6.41576e-06	1	1.95923
cg03092918	chr10	126107592	OAT	Promoter_Associated	Island	0.0254613	0.0436399	4.57497	6.43893e-06	1	1.95577
cg02567756	chr3	137906401	ARMC8;ARMC8;ARMC8;ARMC8;ARMC8;ARMC8	Promoter_Associated	Island	0.0182263	0.0378537	4.57441	6.4554e-06	1	1.95332
cg18774318	chr19	45004584	ZNF180	Promoter_Associated	Island	0.010682	0.083785	4.57383	6.47234e-06	1	1.95081
cg04315264	chr6	35436252	RPL10A	Promoter_Associated	Island	0.0182512	0.099017	4.57115	6.55113e-06	1	1.93919
cg03697316	chr22	21336741	LZTR1	Promoter_Associated	Island	0.0268136	0.0460102	4.57032	6.57602e-06	1	1.93555
cg01403246	chr8	144512192	MAFA		Island	0.0244293	0.153142	4.56928	6.60684e-06	1	1.93107
cg26050838	chr7	142985210	CASP2;CASP2	NonGene_Associated	Island	0.0180625	0.0324351	4.56728	6.66689e-06	1	1.92238
cg27086020	chr5	148206096	ADRB2	Promoter_Associated	Island	0.0109165	0.0286825	4.56623	6.69872e-06	1	1.91781
cg08937729	chr2	9563859	ITGB1BP1;ITGB1BP1;CPSF3	Promoter_Associated	Island	0.0105604	0.0576415	4.56466	6.74649e-06	1	1.91099
cg13919607	chr16	3451181	ZNF174;ZNF174;ZNF434	Promoter_Associated	Island	0.00646563	0.0368664	4.56414	6.76232e-06	1	1.90874
cg04564646	chr1	113217655	MOV10;MOV10		Island	0.00744371	0.026947	4.56364	6.77749e-06	1	1.90659
cg16329901	chr2	220094343	ATG9A;ANKZF1;ANKZF1;ATG9A;ATG9A;ATG9A	Promoter_Associated	Island	0.0103649	0.0778361	4.56236	6.81704e-06	1	1.90101
cg12133425	chr1	247494926	ZNF496;ZNF496		Island	0.0210872	0.0480507	4.56206	6.82602e-06	1	1.89975
cg19373170	chr3	53079105	SFMBT1;SFMBT1;SFMBT1;SFMBT1		Island	0.0182659	0.0632357	4.56068	6.869e-06	1	1.89372
cg21702497	chr16	22309096	POLR3E		Island	0.0146972	0.098274	4.55879	6.92782e-06	1	1.88554
cg25869317	chr15	101792241	CHSY1	Promoter_Associated	Island	0.0383135	0.119558	4.55741	6.97101e-06	1	1.87958
cg01493617	chr17	79650915	HGS;ARL16;ARL16	Promoter_Associated	Island	0.0106483	0.0392264	4.55739	6.97173e-06	1	1.87948
cg21442773	chr1	236029828	LYST	Promoter_Associated	Island	0.019838	0.0565776	4.55735	6.97292e-06	1	1.87931
cg07086847	chr8	145550618	DGAT1	Promoter_Associated	Island	0.0160607	0.0350848	4.55734	6.9733e-06	1	1.87926
cg18429793	chr10	127408055	C10orf137	Unclassified	Island	0.0116487	0.0599602	4.55475	7.05527e-06	1	1.86805
cg05815411	chr17	61819127	STRADA;STRADA;STRADA;STRADA;STRADA;STRADA;STRADA;STRADA;STRADA;STRADA;STRADA;STRADA	Promoter_Associated	Island	0.0111598	0.0521301	4.5546	7.05993e-06	1	1.86742
cg00803088	chr10	43600706	RET;RET	Unclassified	Island	0.038051	0.073286	4.55459	7.0604e-06	1	1.86735
cg04192862	chr10	28966472	BAMBI;BAMBI	Promoter_Associated	Island	0.0317261	0.120118	4.55335	7.09983e-06	1	1.86201
cg25781121	chr3	48282641	ZNF589;ZNF589	Promoter_Associated	Island	0.0114338	0.0266019	4.55244	7.12899e-06	1	1.85808
cg19375676	chr1	244615173	ADSS;ADSS	Promoter_Associated	Island	0.01284	0.0511625	4.55206	7.14145e-06	1	1.8564

## Sheet: Table S5. Functional analysis
Table S5. Functional analysis of the 21 loci, containing the 22 CpGs, significantly associated to IS using Fuma
Category	GeneSet	N_genes	N_overlap	p	adjP	genes	link
Wikipathways	Angiogenesis%WikiPathways_20190110%WP1539%Homo sapiens	24	2	2.93802e-05	0.0142788	HIF1A:MAPK1	http://www.wikipathways.org/instance/WP1539_r95042
KEGG	KEGG_MTOR_SIGNALING_PATHWAY	52	2	0.000140405	0.0232905	HIF1A:MAPK1	http://www.broadinstitute.org/gsea/msigdb/cards/KEGG_MTOR_SIGNALING_PATHWAY
KEGG	KEGG_RENAL_CELL_CARCINOMA	70	2	0.000254843	0.0232905	HIF1A:MAPK1	http://www.broadinstitute.org/gsea/msigdb/cards/KEGG_RENAL_CELL_CARCINOMA
KEGG	KEGG_PROGESTERONE_MEDIATED_OOCYTE_MATURATION	85	2	0.000375654	0.0232905	ANAPC11:MAPK1	http://www.broadinstitute.org/gsea/msigdb/cards/KEGG_PROGESTERONE_MEDIATED_OOCYTE_MATURATION
Hallmark_gene_sets	HALLMARK_PROTEIN_SECRETION	96	2	0.000478826	0.0239413	NAPA:MAPK1	http://www.broadinstitute.org/gsea/msigdb/cards/HALLMARK_PROTEIN_SECRETION
KEGG	KEGG_OOCYTE_MEIOSIS	112	2	0.000650738	0.0302593	ANAPC11:MAPK1	http://www.broadinstitute.org/gsea/msigdb/cards/KEGG_OOCYTE_MEIOSIS
Hallmark_gene_sets	HALLMARK_INTERFERON_GAMMA_RESPONSE	200	2	0.0020488	0.0341466	IL15RA:HIF1A	http://www.broadinstitute.org/gsea/msigdb/cards/HALLMARK_INTERFERON_GAMMA_RESPONSE
Hallmark_gene_sets	HALLMARK_INFLAMMATORY_RESPONSE	200	2	0.0020488	0.0341466	IL15RA:HIF1A	http://www.broadinstitute.org/gsea/msigdb/cards/HALLMARK_INFLAMMATORY_RESPONSE
Wikipathways	Oncostatin M Signaling Pathway%WikiPathways_20190110%WP2374%Homo sapiens	65	2	0.0002197	0.0366967	HIF1A:MAPK1	http://www.wikipathways.org/instance/WP2374_r98073
Wikipathways	AGE/RAGE pathway%WikiPathways_20190110%WP2324%Homo sapiens	66	2	0.000226523	0.0366967	HIF1A:MAPK1	http://www.wikipathways.org/instance/WP2324_r96980
Canonical_Pathways	PID_VEGFR1_PATHWAY	26	2	3.45831e-05	0.0459609	HIF1A:MAPK1	http://www.broadinstitute.org/gsea/msigdb/cards/PID_VEGFR1_PATHWAY
Canonical_Pathways	PID_BMP_PATHWAY	42	2	9.13409e-05	0.0466495	BAMBI:MAPK1	http://www.broadinstitute.org/gsea/msigdb/cards/PID_BMP_PATHWAY
Canonical_Pathways	KEGG_MTOR_SIGNALING_PATHWAY	52	2	0.000140405	0.0466495	HIF1A:MAPK1	http://www.broadinstitute.org/gsea/msigdb/cards/KEGG_MTOR_SIGNALING_PATHWAY
Canonical_Pathways	REACTOME_GOLGI_ASSOCIATED_VESICLE_BIOGENESIS	52	2	0.000140405	0.0466495	PUM1:NAPA	http://www.broadinstitute.org/gsea/msigdb/cards/REACTOME_GOLGI_ASSOCIATED_VESICLE_BIOGENESIS
Canonical_Pathways	REACTOME_TRANS_GOLGI_NETWORK_VESICLE_BUDDING	59	2	0.00018093	0.0480913	PUM1:NAPA	http://www.broadinstitute.org/gsea/msigdb/cards/REACTOME_TRANS_GOLGI_NETWORK_VESICLE_BUDDING
Wikipathways	T-Cell antigen Receptor (TCR) Signaling Pathway%WikiPathways_20190110%WP69%Homo sapiens	90	2	0.000421027	0.0511548	IL15RA:MAPK1	http://www.wikipathways.org/instance/WP69_r97623
Canonical_Pathways	KEGG_RENAL_CELL_CARCINOMA	70	2	0.000254843	0.0564477	HIF1A:MAPK1	http://www.broadinstitute.org/gsea/msigdb/cards/KEGG_RENAL_CELL_CARCINOMA
Reactome	REACTOME_GOLGI_ASSOCIATED_VESICLE_BIOGENESIS	52	2	0.000140405	0.0609735	PUM1:NAPA	http://www.broadinstitute.org/gsea/msigdb/cards/REACTOME_GOLGI_ASSOCIATED_VESICLE_BIOGENESIS
Reactome	REACTOME_TRANS_GOLGI_NETWORK_VESICLE_BUDDING	59	2	0.00018093	0.0609735	PUM1:NAPA	http://www.broadinstitute.org/gsea/msigdb/cards/REACTOME_TRANS_GOLGI_NETWORK_VESICLE_BUDDING
Canonical_Pathways	KEGG_PROGESTERONE_MEDIATED_OOCYTE_MATURATION	85	2	0.000375654	0.0713205	ANAPC11:MAPK1	http://www.broadinstitute.org/gsea/msigdb/cards/KEGG_PROGESTERONE_MEDIATED_OOCYTE_MATURATION
Canonical_Pathways	KEGG_OOCYTE_MEIOSIS	112	2	0.000650738	0.108104	ANAPC11:MAPK1	http://www.broadinstitute.org/gsea/msigdb/cards/KEGG_OOCYTE_MEIOSIS
Canonical_Pathways	REACTOME_MEMBRANE_TRAFFICKING	127	2	0.000835225	0.123335	PUM1:NAPA	http://www.broadinstitute.org/gsea/msigdb/cards/REACTOME_MEMBRANE_TRAFFICKING
Wikipathways	Epithelial to mesenchymal transition in colorectal cancer%WikiPathways_20190110%WP4239%Homo sapiens	160	2	0.00131956	0.128261	HIF1A:MAPK1	http://www.wikipathways.org/instance/WP4239_r97604
Wikipathways	TCA Cycle Nutrient Utilization and Invasiveness of Ovarian Cancer%WikiPathways_20190110%WP2868%Homo sapiens	5	1	0.00170634	0.131288	MAPK1	http://www.wikipathways.org/instance/WP2868_r90260
Wikipathways	HIF1A and PPARG regulation of glycolysis%WikiPathways_20190110%WP2456%Homo sapiens	8	1	0.00272886	0.131288	HIF1A	http://www.wikipathways.org/instance/WP2456_r96297
Wikipathways	MicroRNA for Targeting Cancer Growth and Vascularization in Glioblastoma%WikiPathways_20190110%WP3593%Homo sapiens	9	1	0.00306949	0.131288	HIF1A	http://www.wikipathways.org/instance/WP3593_r97691
Wikipathways	NAD metabolism, sirtuins and aging%WikiPathways_20190110%WP3630%Homo sapiens	11	1	0.00375042	0.131288	HIF1A	http://www.wikipathways.org/instance/WP3630_r94184
Wikipathways	MAPK and NFkB Signalling Pathways Inhibited by Yersinia YopJ%WikiPathways_20190110%WP3849%Homo sapiens	12	1	0.00409073	0.131288	MAPK1	http://www.wikipathways.org/instance/WP3849_r89943
Wikipathways	LncRNA-mediated mechanisms of therapeutic resistance%WikiPathways_20190110%WP3672%Homo sapiens	12	1	0.00409073	0.131288	HIF1A	http://www.wikipathways.org/instance/WP3672_r96967
Wikipathways	MFAP5-mediated ovarian cancer cell motility and invasiveness%WikiPathways_20190110%WP3301%Homo sapiens	13	1	0.00443093	0.131288	MAPK1	http://www.wikipathways.org/instance/WP3301_r97674
Wikipathways	Osteopontin Signaling%WikiPathways_20190110%WP1434%Homo sapiens	13	1	0.00443093	0.131288	MAPK1	http://www.wikipathways.org/instance/WP1434_r94913
Wikipathways	Focal Adhesion-PI3K-Akt-mTOR-signaling pathway%WikiPathways_20190110%WP3932%Homo sapiens	307	2	0.00473876	0.131288	HIF1A:MAPK1	http://www.wikipathways.org/instance/WP3932_r102154
Wikipathways	ERK Pathway in Huntington's Disease%WikiPathways_20190110%WP3853%Homo sapiens	14	1	0.00477102	0.131288	MAPK1	http://www.wikipathways.org/instance/WP3853_r97672
Wikipathways	Regulation of sister chromatid separation at the metaphase-anaphase transition%WikiPathways_20190110%WP4240%Homo sapiens	16	1	0.00545089	0.131288	ANAPC11	http://www.wikipathways.org/instance/WP4240_r96623
Wikipathways	TGF-B Signaling in Thyroid Cells for Epithelial-Mesenchymal Transition%WikiPathways_20190110%WP3859%Homo sapiens	18	1	0.00613034	0.131288	MAPK1	http://www.wikipathways.org/instance/WP3859_r90120
Wikipathways	IL-9 Signaling Pathway%WikiPathways_20190110%WP22%Homo sapiens	18	1	0.00613034	0.131288	MAPK1	http://www.wikipathways.org/instance/WP22_r97775
Wikipathways	Inhibition of exosome biogenesis and secretion by Manumycin A in CRPC cells%WikiPathways_20190110%WP4301%Homo sapiens	18	1	0.00613034	0.131288	MAPK1	http://www.wikipathways.org/instance/WP4301_r97800
Wikipathways	4-hydroxytamoxifen, Dexamethasone, and Retinoic Acids Regulation of p27 Expression%WikiPathways_20190110%WP3879%Homo sapiens	18	1	0.00613034	0.131288	MAPK1	http://www.wikipathways.org/instance/WP3879_r97670
Wikipathways	Serotonin Receptor 4/6/7 and NR3C Signaling%WikiPathways_20190110%WP734%Homo sapiens	19	1	0.0064699	0.131288	MAPK1	http://www.wikipathways.org/instance/WP734_r101930
Wikipathways	Hereditary leiomyomatosis and renal cell carcinoma pathway%WikiPathways_20190110%WP4206%Homo sapiens	20	1	0.00680935	0.131288	HIF1A	http://www.wikipathways.org/instance/WP4206_r97123
Wikipathways	Serotonin Receptor 2 and ELK-SRF/GATA4 signaling%WikiPathways_20190110%WP732%Homo sapiens	20	1	0.00680935	0.131288	MAPK1	http://www.wikipathways.org/instance/WP732_r101994
Wikipathways	Neovascularisation processes%WikiPathways_20190110%WP4331%Homo sapiens	21	1	0.0071487	0.131288	MAPK1	http://www.wikipathways.org/instance/WP4331_r102451
Wikipathways	Type II diabetes mellitus%WikiPathways_20190110%WP1584%Homo sapiens	22	1	0.00748795	0.131288	MAPK1	http://www.wikipathways.org/instance/WP1584_r94959
Wikipathways	Estrogen signaling pathway%WikiPathways_20190110%WP712%Homo sapiens	23	1	0.00782708	0.131288	MAPK1	http://www.wikipathways.org/instance/WP712_r78491
Wikipathways	EBV LMP1 signaling%WikiPathways_20190110%WP262%Homo sapiens	24	1	0.00816611	0.131288	MAPK1	http://www.wikipathways.org/instance/WP262_r97758
Wikipathways	Physiological and Pathological Hypertrophy of the Heart%WikiPathways_20190110%WP1528%Homo sapiens	25	1	0.00850504	0.131288	MAPK1	http://www.wikipathways.org/instance/WP1528_r97641
Wikipathways	IL-7 Signaling Pathway%WikiPathways_20190110%WP205%Homo sapiens	25	1	0.00850504	0.131288	MAPK1	http://www.wikipathways.org/instance/WP205_r89854
Wikipathways	Hypothesized Pathways in Pathogenesis of Cardiovascular Disease%WikiPathways_20190110%WP3668%Homo sapiens	25	1	0.00850504	0.131288	MAPK1	http://www.wikipathways.org/instance/WP3668_r97639
Wikipathways	Signal Transduction of S1P Receptor%WikiPathways_20190110%WP26%Homo sapiens	26	1	0.00884386	0.131288	MAPK1	http://www.wikipathways.org/instance/WP26_r102299
Wikipathways	EPO Receptor Signaling%WikiPathways_20190110%WP581%Homo sapiens	26	1	0.00884386	0.131288	MAPK1	http://www.wikipathways.org/instance/WP581_r86897
Wikipathways	Follicle Stimulating Hormone (FSH) signaling pathway%WikiPathways_20190110%WP2035%Homo sapiens	27	1	0.00918257	0.131288	MAPK1	http://www.wikipathways.org/instance/WP2035_r101857
Wikipathways	Nanoparticle-mediated activation of receptor signaling%WikiPathways_20190110%WP2643%Homo sapiens	28	1	0.00952117	0.131288	MAPK1	http://www.wikipathways.org/instance/WP2643_r102132
Wikipathways	MAPK Cascade%WikiPathways_20190110%WP422%Homo sapiens	29	1	0.00985967	0.131288	MAPK1	http://www.wikipathways.org/instance/WP422_r95146
Wikipathways	Cannabinoid receptor signaling%WikiPathways_20190110%WP3869%Homo sapiens	29	1	0.00985967	0.131288	MAPK1	http://www.wikipathways.org/instance/WP3869_r98007
Wikipathways	IL17 signaling pathway%WikiPathways_20190110%WP2112%Homo sapiens	31	1	0.0105364	0.131288	MAPK1	http://www.wikipathways.org/instance/WP2112_r94745
Wikipathways	Toll-like Receptor Signaling%WikiPathways_20190110%WP3858%Homo sapiens	32	1	0.0108745	0.131288	MAPK1	http://www.wikipathways.org/instance/WP3858_r89945
Wikipathways	Endothelin Pathways%WikiPathways_20190110%WP2197%Homo sapiens	33	1	0.0112126	0.131288	MAPK1	http://www.wikipathways.org/instance/WP2197_r94181
Wikipathways	Resistin as a regulator of inflammation%WikiPathways_20190110%WP4481%Homo sapiens	33	1	0.0112126	0.131288	MAPK1	http://www.wikipathways.org/instance/WP4481_r102529
Wikipathways	BDNF-TrkB Signaling%WikiPathways_20190110%WP3676%Homo sapiens	33	1	0.0112126	0.131288	MAPK1	http://www.wikipathways.org/instance/WP3676_r94186
Wikipathways	Signaling of Hepatocyte Growth Factor Receptor%WikiPathways_20190110%WP313%Homo sapiens	34	1	0.0115506	0.131288	MAPK1	http://www.wikipathways.org/instance/WP313_r97740
Wikipathways	Alpha 6 Beta 4 signaling pathway%WikiPathways_20190110%WP244%Homo sapiens	35	1	0.0118884	0.131288	MAPK1	http://www.wikipathways.org/instance/WP244_r85199
Wikipathways	Type 2 papillary renal cell carcinoma%WikiPathways_20190110%WP4241%Homo sapiens	36	1	0.0122262	0.131288	HIF1A	http://www.wikipathways.org/instance/WP4241_r97131
Wikipathways	Prion disease pathway%WikiPathways_20190110%WP3995%Homo sapiens	37	1	0.0125639	0.131288	MAPK1	http://www.wikipathways.org/instance/WP3995_r96400
Wikipathways	Photodynamic therapy-induced HIF-1 survival signaling%WikiPathways_20190110%WP3614%Homo sapiens	37	1	0.0125639	0.131288	HIF1A	http://www.wikipathways.org/instance/WP3614_r89311
Wikipathways	PDGF Pathway%WikiPathways_20190110%WP2526%Homo sapiens	38	1	0.0129014	0.131288	MAPK1	http://www.wikipathways.org/instance/WP2526_r101933
Wikipathways	IL-5 Signaling Pathway%WikiPathways_20190110%WP127%Homo sapiens	40	1	0.0135762	0.131288	MAPK1	http://www.wikipathways.org/instance/WP127_r78498
Wikipathways	Bladder Cancer%WikiPathways_20190110%WP2828%Homo sapiens	41	1	0.0139134	0.131288	MAPK1	http://www.wikipathways.org/instance/WP2828_r98708
Wikipathways	IL-2 Signaling Pathway%WikiPathways_20190110%WP49%Homo sapiens	42	1	0.0142505	0.131288	MAPK1	http://www.wikipathways.org/instance/WP49_r95132
Wikipathways	TNF related weak inducer of apoptosis (TWEAK) Signaling Pathway%WikiPathways_20190110%WP2036%Homo sapiens	42	1	0.0142505	0.131288	MAPK1	http://www.wikipathways.org/instance/WP2036_r96646
Wikipathways	Common Pathways Underlying Drug Addiction%WikiPathways_20190110%WP2636%Homo sapiens	42	1	0.0142505	0.131288	MAPK1	http://www.wikipathways.org/instance/WP2636_r95595
Wikipathways	Vitamin A and Carotenoid Metabolism%WikiPathways_20190110%WP716%Homo sapiens	43	1	0.0145876	0.131288	MAPK1	http://www.wikipathways.org/instance/WP716_r97560
Wikipathways	IL-6 signaling pathway%WikiPathways_20190110%WP364%Homo sapiens	43	1	0.0145876	0.131288	MAPK1	http://www.wikipathways.org/instance/WP364_r89832
Wikipathways	Interleukin-11 Signaling Pathway%WikiPathways_20190110%WP2332%Homo sapiens	44	1	0.0149245	0.131878	MAPK1	http://www.wikipathways.org/instance/WP2332_r79525
Wikipathways	Heart Development%WikiPathways_20190110%WP1591%Homo sapiens	46	1	0.015598	0.133302	MAPK1	http://www.wikipathways.org/instance/WP1591_r94736
Wikipathways	Thymic Stromal LymphoPoietin (TSLP) Signaling Pathway%WikiPathways_20190110%WP2203%Homo sapiens	47	1	0.0159346	0.133302	MAPK1	http://www.wikipathways.org/instance/WP2203_r96065
Wikipathways	Aryl Hydrocarbon Receptor%WikiPathways_20190110%WP2586%Homo sapiens	48	1	0.0162711	0.133302	MAPK1	http://www.wikipathways.org/instance/WP2586_r91687
Wikipathways	IL-3 Signaling Pathway%WikiPathways_20190110%WP286%Homo sapiens	49	1	0.0166074	0.133302	MAPK1	http://www.wikipathways.org/instance/WP286_r78583
Wikipathways	Hepatitis C and Hepatocellular Carcinoma%WikiPathways_20190110%WP3646%Homo sapiens	50	1	0.0169437	0.133302	HIF1A	http://www.wikipathways.org/instance/WP3646_r102150
Wikipathways	Structural Pathway of Interleukin 1 (IL-1)%WikiPathways_20190110%WP2637%Homo sapiens	50	1	0.0169437	0.133302	MAPK1	http://www.wikipathways.org/instance/WP2637_r87707
Wikipathways	Wnt Signaling Pathway%WikiPathways_20190110%WP363%Homo sapiens	51	1	0.0172799	0.133302	MAPK1	http://www.wikipathways.org/instance/WP363_r97637
Wikipathways	Synaptic Vesicle Pathway%WikiPathways_20190110%WP2267%Homo sapiens	51	1	0.0172799	0.133302	NAPA	http://www.wikipathways.org/instance/WP2267_r96972
Wikipathways	Apoptosis-related network due to altered Notch3 in ovarian cancer%WikiPathways_20190110%WP2864%Homo sapiens	53	1	0.0179519	0.133539	MAPK1	http://www.wikipathways.org/instance/WP2864_r79278
Wikipathways	RANKL/RANK (Receptor activator of NFKB (ligand)) Signaling Pathway%WikiPathways_20190110%WP2018%Homo sapiens	55	1	0.0186235	0.133539	MAPK1	http://www.wikipathways.org/instance/WP2018_r90016
Wikipathways	IL-4 Signaling Pathway%WikiPathways_20190110%WP395%Homo sapiens	55	1	0.0186235	0.133539	MAPK1	http://www.wikipathways.org/instance/WP395_r89828
Wikipathways	IL-1 signaling pathway%WikiPathways_20190110%WP195%Homo sapiens	56	1	0.0189592	0.133539	MAPK1	http://www.wikipathways.org/instance/WP195_r89932
Wikipathways	Cardiac Hypertrophic Response%WikiPathways_20190110%WP2795%Homo sapiens	56	1	0.0189592	0.133539	MAPK1	http://www.wikipathways.org/instance/WP2795_r97631
Wikipathways	TGF-beta Receptor Signaling%WikiPathways_20190110%WP560%Homo sapiens	56	1	0.0189592	0.133539	BAMBI	http://www.wikipathways.org/instance/WP560_r94936
Curated_gene_sets	PID_VEGFR1_PATHWAY	26	2	3.45831e-05	0.133721	HIF1A:MAPK1	http://www.broadinstitute.org/gsea/msigdb/cards/PID_VEGFR1_PATHWAY
Curated_gene_sets	PID_BMP_PATHWAY	42	2	9.13409e-05	0.133721	BAMBI:MAPK1	http://www.broadinstitute.org/gsea/msigdb/cards/PID_BMP_PATHWAY
Curated_gene_sets	MARTIN_INTERACT_WITH_HDAC	44	2	0.00010032	0.133721	HIF1A:MAPK1	http://www.broadinstitute.org/gsea/msigdb/cards/MARTIN_INTERACT_WITH_HDAC
Curated_gene_sets	KEGG_MTOR_SIGNALING_PATHWAY	52	2	0.000140405	0.133721	HIF1A:MAPK1	http://www.broadinstitute.org/gsea/msigdb/cards/KEGG_MTOR_SIGNALING_PATHWAY
Curated_gene_sets	REACTOME_GOLGI_ASSOCIATED_VESICLE_BIOGENESIS	52	2	0.000140405	0.133721	PUM1:NAPA	http://www.broadinstitute.org/gsea/msigdb/cards/REACTOME_GOLGI_ASSOCIATED_VESICLE_BIOGENESIS
Wikipathways	miRNA regulation of prostate cancer signaling pathways%WikiPathways_20190110%WP3981%Homo sapiens	58	1	0.0196302	0.136289	MAPK1	http://www.wikipathways.org/instance/WP3981_r97532
Wikipathways	MET in type 1 papillary renal cell carcinoma%WikiPathways_20190110%WP4205%Homo sapiens	59	1	0.0199655	0.136665	MAPK1	http://www.wikipathways.org/instance/WP4205_r97130
Wikipathways	Kit receptor signaling pathway%WikiPathways_20190110%WP304%Homo sapiens	60	1	0.0203007	0.13703	MAPK1	http://www.wikipathways.org/instance/WP304_r78799
Wikipathways	Notch Signaling Pathway%WikiPathways_20190110%WP61%Homo sapiens	62	1	0.0209709	0.139614	HIF1A	http://www.wikipathways.org/instance/WP61_r78592
Wikipathways	Endometrial cancer%WikiPathways_20190110%WP4155%Homo sapiens	63	1	0.0213058	0.139927	MAPK1	http://www.wikipathways.org/instance/WP4155_r97135
Canonical_Pathways	REACTOME_RAF_MAP_KINASE_CASCADE	10	1	0.00341001	0.140314	MAPK1	http://www.broadinstitute.org/gsea/msigdb/cards/REACTOME_RAF_MAP_KINASE_CASCADE
Canonical_Pathways	REACTOME_ACTIVATION_OF_THE_AP1_FAMILY_OF_TRANSCRIPTION_FACTORS	10	1	0.00341001	0.140314	MAPK1	http://www.broadinstitute.org/gsea/msigdb/cards/REACTOME_ACTIVATION_OF_THE_AP1_FAMILY_OF_TRANSCRIPTION_FACTORS
Canonical_Pathways	BIOCARTA_CDK5_PATHWAY	11	1	0.00375042	0.140314	MAPK1	http://www.broadinstitute.org/gsea/msigdb/cards/BIOCARTA_CDK5_PATHWAY
Canonical_Pathways	BIOCARTA_EPONFKB_PATHWAY	11	1	0.00375042	0.140314	HIF1A	http://www.broadinstitute.org/gsea/msigdb/cards/BIOCARTA_EPONFKB_PATHWAY
Canonical_Pathways	BIOCARTA_BARR_MAPK_PATHWAY	12	1	0.00409073	0.140314	MAPK1	http://www.broadinstitute.org/gsea/msigdb/cards/BIOCARTA_BARR_MAPK_PATHWAY
Canonical_Pathways	REACTOME_ERKS_ARE_INACTIVATED	12	1	0.00409073	0.140314	MAPK1	http://www.broadinstitute.org/gsea/msigdb/cards/REACTOME_ERKS_ARE_INACTIVATED
Canonical_Pathways	REACTOME_ADVANCED_GLYCOSYLATION_ENDPRODUCT_RECEPTOR_SIGNALING	13	1	0.00443093	0.140314	MAPK1	http://www.broadinstitute.org/gsea/msigdb/cards/REACTOME_ADVANCED_GLYCOSYLATION_ENDPRODUCT_RECEPTOR_SIGNALING
Canonical_Pathways	BIOCARTA_ARENRF2_PATHWAY	13	1	0.00443093	0.140314	MAPK1	http://www.broadinstitute.org/gsea/msigdb/cards/BIOCARTA_ARENRF2_PATHWAY
Canonical_Pathways	REACTOME_SPRY_REGULATION_OF_FGF_SIGNALING	13	1	0.00443093	0.140314	MAPK1	http://www.broadinstitute.org/gsea/msigdb/cards/REACTOME_SPRY_REGULATION_OF_FGF_SIGNALING
Canonical_Pathways	PID_S1P_S1P4_PATHWAY	14	1	0.00477102	0.140314	MAPK1	http://www.broadinstitute.org/gsea/msigdb/cards/PID_S1P_S1P4_PATHWAY
Canonical_Pathways	REACTOME_SOS_MEDIATED_SIGNALLING	14	1	0.00477102	0.140314	MAPK1	http://www.broadinstitute.org/gsea/msigdb/cards/REACTOME_SOS_MEDIATED_SIGNALLING
Canonical_Pathways	PID_TCR_RAS_PATHWAY	14	1	0.00477102	0.140314	MAPK1	http://www.broadinstitute.org/gsea/msigdb/cards/PID_TCR_RAS_PATHWAY
Canonical_Pathways	REACTOME_SHC1_EVENTS_IN_EGFR_SIGNALING	15	1	0.00511101	0.140314	MAPK1	http://www.broadinstitute.org/gsea/msigdb/cards/REACTOME_SHC1_EVENTS_IN_EGFR_SIGNALING
Canonical_Pathways	REACTOME_SIGNALLING_TO_P38_VIA_RIT_AND_RIN	15	1	0.00511101	0.140314	MAPK1	http://www.broadinstitute.org/gsea/msigdb/cards/REACTOME_SIGNALLING_TO_P38_VIA_RIT_AND_RIN
Canonical_Pathways	BIOCARTA_HIF_PATHWAY	15	1	0.00511101	0.140314	HIF1A	http://www.broadinstitute.org/gsea/msigdb/cards/BIOCARTA_HIF_PATHWAY
Canonical_Pathways	BIOCARTA_BARRESTIN_SRC_PATHWAY	15	1	0.00511101	0.140314	MAPK1	http://www.broadinstitute.org/gsea/msigdb/cards/BIOCARTA_BARRESTIN_SRC_PATHWAY
Canonical_Pathways	REACTOME_SHC_MEDIATED_SIGNALLING	15	1	0.00511101	0.140314	MAPK1	http://www.broadinstitute.org/gsea/msigdb/cards/REACTOME_SHC_MEDIATED_SIGNALLING
Canonical_Pathways	PID_ARF6_DOWNSTREAM_PATHWAY	15	1	0.00511101	0.140314	MAPK1	http://www.broadinstitute.org/gsea/msigdb/cards/PID_ARF6_DOWNSTREAM_PATHWAY
Canonical_Pathways	KEGG_PATHWAYS_IN_CANCER	325	2	0.0052936	0.140314	HIF1A:MAPK1	http://www.broadinstitute.org/gsea/msigdb/cards/KEGG_PATHWAYS_IN_CANCER
Canonical_Pathways	ST_G_ALPHA_S_PATHWAY	16	1	0.00545089	0.140314	MAPK1	http://www.broadinstitute.org/gsea/msigdb/cards/ST_G_ALPHA_S_PATHWAY
Canonical_Pathways	REACTOME_CONVERSION_FROM_APC_C_CDC20_TO_APC_C_CDH1_IN_LATE_ANAPHASE	16	1	0.00545089	0.140314	ANAPC11	http://www.broadinstitute.org/gsea/msigdb/cards/REACTOME_CONVERSION_FROM_APC_C_CDC20_TO_APC_C_CDH1_IN_LATE_ANAPHASE
Canonical_Pathways	BIOCARTA_CDMAC_PATHWAY	16	1	0.00545089	0.140314	MAPK1	http://www.broadinstitute.org/gsea/msigdb/cards/BIOCARTA_CDMAC_PATHWAY
Canonical_Pathways	PID_SMAD2_3PATHWAY	17	1	0.00579067	0.140314	MAPK1	http://www.broadinstitute.org/gsea/msigdb/cards/PID_SMAD2_3PATHWAY
Canonical_Pathways	PID_ANTHRAX_PATHWAY	17	1	0.00579067	0.140314	MAPK1	http://www.broadinstitute.org/gsea/msigdb/cards/PID_ANTHRAX_PATHWAY
Canonical_Pathways	REACTOME_PHOSPHORYLATION_OF_THE_APC_C	17	1	0.00579067	0.140314	ANAPC11	http://www.broadinstitute.org/gsea/msigdb/cards/REACTOME_PHOSPHORYLATION_OF_THE_APC_C
Canonical_Pathways	REACTOME_ARMS_MEDIATED_ACTIVATION	17	1	0.00579067	0.140314	MAPK1	http://www.broadinstitute.org/gsea/msigdb/cards/REACTOME_ARMS_MEDIATED_ACTIVATION
Canonical_Pathways	BIOCARTA_HCMV_PATHWAY	17	1	0.00579067	0.140314	MAPK1	http://www.broadinstitute.org/gsea/msigdb/cards/BIOCARTA_HCMV_PATHWAY
Canonical_Pathways	SA_PTEN_PATHWAY	17	1	0.00579067	0.140314	MAPK1	http://www.broadinstitute.org/gsea/msigdb/cards/SA_PTEN_PATHWAY
Canonical_Pathways	REACTOME_OXYGEN_DEPENDENT_PROLINE_HYDROXYLATION_OF_HYPOXIA_INDUCIBLE_FACTOR_ALPHA	17	1	0.00579067	0.140314	HIF1A	http://www.broadinstitute.org/gsea/msigdb/cards/REACTOME_OXYGEN_DEPENDENT_PROLINE_HYDROXYLATION_OF_HYPOXIA_INDUCIBLE_FACTOR_ALPHA
Canonical_Pathways	REACTOME_SHC_RELATED_EVENTS	17	1	0.00579067	0.140314	MAPK1	http://www.broadinstitute.org/gsea/msigdb/cards/REACTOME_SHC_RELATED_EVENTS
Canonical_Pathways	BIOCARTA_PTEN_PATHWAY	18	1	0.00613034	0.140314	MAPK1	http://www.broadinstitute.org/gsea/msigdb/cards/BIOCARTA_PTEN_PATHWAY
Canonical_Pathways	BIOCARTA_SPRY_PATHWAY	18	1	0.00613034	0.140314	MAPK1	http://www.broadinstitute.org/gsea/msigdb/cards/BIOCARTA_SPRY_PATHWAY
Canonical_Pathways	REACTOME_INHIBITION_OF_THE_PROTEOLYTIC_ACTIVITY_OF_APC_C_REQUIRED_FOR_THE_ONSET_OF_ANAPHASE_BY_MITOTIC_SPINDLE_CHECKPOINT_COMPONENTS	18	1	0.00613034	0.140314	ANAPC11	http://www.broadinstitute.org/gsea/msigdb/cards/REACTOME_INHIBITION_OF_THE_PROTEOLYTIC_ACTIVITY_OF_APC_C_REQUIRED_FOR_THE_ONSET_OF_ANAPHASE_BY_MITOTIC_SPINDLE_CHECKPOINT_COMPONENTS
Canonical_Pathways	BIOCARTA_ERK5_PATHWAY	18	1	0.00613034	0.140314	MAPK1	http://www.broadinstitute.org/gsea/msigdb/cards/BIOCARTA_ERK5_PATHWAY
Canonical_Pathways	REACTOME_PROLONGED_ERK_ACTIVATION_EVENTS	19	1	0.0064699	0.140314	MAPK1	http://www.broadinstitute.org/gsea/msigdb/cards/REACTOME_PROLONGED_ERK_ACTIVATION_EVENTS
Canonical_Pathways	BIOCARTA_MAL_PATHWAY	19	1	0.0064699	0.140314	MAPK1	http://www.broadinstitute.org/gsea/msigdb/cards/BIOCARTA_MAL_PATHWAY
Canonical_Pathways	REACTOME_APC_C_CDC20_MEDIATED_DEGRADATION_OF_CYCLIN_B	19	1	0.0064699	0.140314	ANAPC11	http://www.broadinstitute.org/gsea/msigdb/cards/REACTOME_APC_C_CDC20_MEDIATED_DEGRADATION_OF_CYCLIN_B
Canonical_Pathways	PID_HIF1A_PATHWAY	19	1	0.0064699	0.140314	HIF1A	http://www.broadinstitute.org/gsea/msigdb/cards/PID_HIF1A_PATHWAY
Canonical_Pathways	REACTOME_SHC1_EVENTS_IN_ERBB4_SIGNALING	20	1	0.00680935	0.140314	MAPK1	http://www.broadinstitute.org/gsea/msigdb/cards/REACTOME_SHC1_EVENTS_IN_ERBB4_SIGNALING
Canonical_Pathways	BIOCARTA_TFF_PATHWAY	21	1	0.0071487	0.140314	MAPK1	http://www.broadinstitute.org/gsea/msigdb/cards/BIOCARTA_TFF_PATHWAY
Canonical_Pathways	REACTOME_ERK_MAPK_TARGETS	21	1	0.0071487	0.140314	MAPK1	http://www.broadinstitute.org/gsea/msigdb/cards/REACTOME_ERK_MAPK_TARGETS
Canonical_Pathways	REACTOME_APC_CDC20_MEDIATED_DEGRADATION_OF_NEK2A	21	1	0.0071487	0.140314	ANAPC11	http://www.broadinstitute.org/gsea/msigdb/cards/REACTOME_APC_CDC20_MEDIATED_DEGRADATION_OF_NEK2A
Canonical_Pathways	PID_S1P_S1P1_PATHWAY	21	1	0.0071487	0.140314	MAPK1	http://www.broadinstitute.org/gsea/msigdb/cards/PID_S1P_S1P1_PATHWAY
Canonical_Pathways	BIOCARTA_CERAMIDE_PATHWAY	22	1	0.00748795	0.140314	MAPK1	http://www.broadinstitute.org/gsea/msigdb/cards/BIOCARTA_CERAMIDE_PATHWAY
Canonical_Pathways	BIOCARTA_SPPA_PATHWAY	22	1	0.00748795	0.140314	MAPK1	http://www.broadinstitute.org/gsea/msigdb/cards/BIOCARTA_SPPA_PATHWAY
Canonical_Pathways	REACTOME_GRB2_EVENTS_IN_ERBB2_SIGNALING	22	1	0.00748795	0.140314	MAPK1	http://www.broadinstitute.org/gsea/msigdb/cards/REACTOME_GRB2_EVENTS_IN_ERBB2_SIGNALING
Canonical_Pathways	BIOCARTA_HER2_PATHWAY	22	1	0.00748795	0.140314	MAPK1	http://www.broadinstitute.org/gsea/msigdb/cards/BIOCARTA_HER2_PATHWAY
Canonical_Pathways	BIOCARTA_P53HYPOXIA_PATHWAY	23	1	0.00782708	0.140314	HIF1A	http://www.broadinstitute.org/gsea/msigdb/cards/BIOCARTA_P53HYPOXIA_PATHWAY
Canonical_Pathways	PID_PRL_SIGNALING_EVENTS_PATHWAY	23	1	0.00782708	0.140314	MAPK1	http://www.broadinstitute.org/gsea/msigdb/cards/PID_PRL_SIGNALING_EVENTS_PATHWAY
Canonical_Pathways	ST_GA12_PATHWAY	23	1	0.00782708	0.140314	MAPK1	http://www.broadinstitute.org/gsea/msigdb/cards/ST_GA12_PATHWAY
Canonical_Pathways	BIOCARTA_IGF1R_PATHWAY	23	1	0.00782708	0.140314	MAPK1	http://www.broadinstitute.org/gsea/msigdb/cards/BIOCARTA_IGF1R_PATHWAY
Canonical_Pathways	BIOCARTA_CCR3_PATHWAY	23	1	0.00782708	0.140314	MAPK1	http://www.broadinstitute.org/gsea/msigdb/cards/BIOCARTA_CCR3_PATHWAY
Canonical_Pathways	REACTOME_REGULATION_OF_HYPOXIA_INDUCIBLE_FACTOR_HIF_BY_OXYGEN	24	1	0.00816611	0.140314	HIF1A	http://www.broadinstitute.org/gsea/msigdb/cards/REACTOME_REGULATION_OF_HYPOXIA_INDUCIBLE_FACTOR_HIF_BY_OXYGEN
Canonical_Pathways	SA_B_CELL_RECEPTOR_COMPLEXES	24	1	0.00816611	0.140314	MAPK1	http://www.broadinstitute.org/gsea/msigdb/cards/SA_B_CELL_RECEPTOR_COMPLEXES
Canonical_Pathways	PID_S1P_S1P2_PATHWAY	24	1	0.00816611	0.140314	MAPK1	http://www.broadinstitute.org/gsea/msigdb/cards/PID_S1P_S1P2_PATHWAY
Canonical_Pathways	REACTOME_GROWTH_HORMONE_RECEPTOR_SIGNALING	24	1	0.00816611	0.140314	MAPK1	http://www.broadinstitute.org/gsea/msigdb/cards/REACTOME_GROWTH_HORMONE_RECEPTOR_SIGNALING
Canonical_Pathways	REACTOME_NUCLEAR_EVENTS_KINASE_AND_TRANSCRIPTION_FACTOR_ACTIVATION	24	1	0.00816611	0.140314	MAPK1	http://www.broadinstitute.org/gsea/msigdb/cards/REACTOME_NUCLEAR_EVENTS_KINASE_AND_TRANSCRIPTION_FACTOR_ACTIVATION
Canonical_Pathways	BIOCARTA_CXCR4_PATHWAY	24	1	0.00816611	0.140314	MAPK1	http://www.broadinstitute.org/gsea/msigdb/cards/BIOCARTA_CXCR4_PATHWAY
Canonical_Pathways	BIOCARTA_ECM_PATHWAY	24	1	0.00816611	0.140314	MAPK1	http://www.broadinstitute.org/gsea/msigdb/cards/BIOCARTA_ECM_PATHWAY
Canonical_Pathways	BIOCARTA_EIF4_PATHWAY	24	1	0.00816611	0.140314	MAPK1	http://www.broadinstitute.org/gsea/msigdb/cards/BIOCARTA_EIF4_PATHWAY
Canonical_Pathways	KEGG_DORSO_VENTRAL_AXIS_FORMATION	24	1	0.00816611	0.140314	MAPK1	http://www.broadinstitute.org/gsea/msigdb/cards/KEGG_DORSO_VENTRAL_AXIS_FORMATION
Canonical_Pathways	PID_LYMPH_ANGIOGENESIS_PATHWAY	25	1	0.00850504	0.140314	MAPK1	http://www.broadinstitute.org/gsea/msigdb/cards/PID_LYMPH_ANGIOGENESIS_PATHWAY
Canonical_Pathways	BIOCARTA_MCALPAIN_PATHWAY	25	1	0.00850504	0.140314	MAPK1	http://www.broadinstitute.org/gsea/msigdb/cards/BIOCARTA_MCALPAIN_PATHWAY
Canonical_Pathways	BIOCARTA_BAD_PATHWAY	26	1	0.00884386	0.140314	MAPK1	http://www.broadinstitute.org/gsea/msigdb/cards/BIOCARTA_BAD_PATHWAY
Canonical_Pathways	PID_ALK1_PATHWAY	26	1	0.00884386	0.140314	MAPK1	http://www.broadinstitute.org/gsea/msigdb/cards/PID_ALK1_PATHWAY
Canonical_Pathways	BIOCARTA_RACCYCD_PATHWAY	26	1	0.00884386	0.140314	MAPK1	http://www.broadinstitute.org/gsea/msigdb/cards/BIOCARTA_RACCYCD_PATHWAY
Canonical_Pathways	REACTOME_SIGNALLING_TO_RAS	27	1	0.00918257	0.140314	MAPK1	http://www.broadinstitute.org/gsea/msigdb/cards/REACTOME_SIGNALLING_TO_RAS
Canonical_Pathways	REACTOME_RECYCLING_PATHWAY_OF_L1	27	1	0.00918257	0.140314	MAPK1	http://www.broadinstitute.org/gsea/msigdb/cards/REACTOME_RECYCLING_PATHWAY_OF_L1
Canonical_Pathways	BIOCARTA_CREB_PATHWAY	27	1	0.00918257	0.140314	MAPK1	http://www.broadinstitute.org/gsea/msigdb/cards/BIOCARTA_CREB_PATHWAY
Canonical_Pathways	REACTOME_CREB_PHOSPHORYLATION_THROUGH_THE_ACTIVATION_OF_RAS	27	1	0.00918257	0.140314	MAPK1	http://www.broadinstitute.org/gsea/msigdb/cards/REACTOME_CREB_PHOSPHORYLATION_THROUGH_THE_ACTIVATION_OF_RAS
Canonical_Pathways	SIG_IL4RECEPTOR_IN_B_LYPHOCYTES	27	1	0.00918257	0.140314	MAPK1	http://www.broadinstitute.org/gsea/msigdb/cards/SIG_IL4RECEPTOR_IN_B_LYPHOCYTES
Canonical_Pathways	ST_GRANULE_CELL_SURVIVAL_PATHWAY	27	1	0.00918257	0.140314	MAPK1	http://www.broadinstitute.org/gsea/msigdb/cards/ST_GRANULE_CELL_SURVIVAL_PATHWAY
Canonical_Pathways	BIOCARTA_EDG1_PATHWAY	27	1	0.00918257	0.140314	MAPK1	http://www.broadinstitute.org/gsea/msigdb/cards/BIOCARTA_EDG1_PATHWAY
Canonical_Pathways	ST_MYOCYTE_AD_PATHWAY	27	1	0.00918257	0.140314	MAPK1	http://www.broadinstitute.org/gsea/msigdb/cards/ST_MYOCYTE_AD_PATHWAY
Canonical_Pathways	BIOCARTA_ERK_PATHWAY	28	1	0.00952117	0.140314	MAPK1	http://www.broadinstitute.org/gsea/msigdb/cards/BIOCARTA_ERK_PATHWAY
Canonical_Pathways	BIOCARTA_GH_PATHWAY	28	1	0.00952117	0.140314	MAPK1	http://www.broadinstitute.org/gsea/msigdb/cards/BIOCARTA_GH_PATHWAY
Canonical_Pathways	PID_TRAIL_PATHWAY	28	1	0.00952117	0.140314	MAPK1	http://www.broadinstitute.org/gsea/msigdb/cards/PID_TRAIL_PATHWAY
Canonical_Pathways	BIOCARTA_VEGF_PATHWAY	29	1	0.00985967	0.140314	HIF1A	http://www.broadinstitute.org/gsea/msigdb/cards/BIOCARTA_VEGF_PATHWAY
Canonical_Pathways	KEGG_THYROID_CANCER	29	1	0.00985967	0.140314	MAPK1	http://www.broadinstitute.org/gsea/msigdb/cards/KEGG_THYROID_CANCER
Canonical_Pathways	BIOCARTA_PYK2_PATHWAY	29	1	0.00985967	0.140314	MAPK1	http://www.broadinstitute.org/gsea/msigdb/cards/BIOCARTA_PYK2_PATHWAY
Canonical_Pathways	REACTOME_CA_DEPENDENT_EVENTS	29	1	0.00985967	0.140314	MAPK1	http://www.broadinstitute.org/gsea/msigdb/cards/REACTOME_CA_DEPENDENT_EVENTS
Canonical_Pathways	PID_S1P_S1P3_PATHWAY	29	1	0.00985967	0.140314	MAPK1	http://www.broadinstitute.org/gsea/msigdb/cards/PID_S1P_S1P3_PATHWAY
Canonical_Pathways	REACTOME_MAPK_TARGETS_NUCLEAR_EVENTS_MEDIATED_BY_MAP_KINASES	30	1	0.0101981	0.140314	MAPK1	http://www.broadinstitute.org/gsea/msigdb/cards/REACTOME_MAPK_TARGETS_NUCLEAR_EVENTS_MEDIATED_BY_MAP_KINASES
Canonical_Pathways	PID_RETINOIC_ACID_PATHWAY	30	1	0.0101981	0.140314	MAPK1	http://www.broadinstitute.org/gsea/msigdb/cards/PID_RETINOIC_ACID_PATHWAY
Canonical_Pathways	PID_AR_NONGENOMIC_PATHWAY	31	1	0.0105364	0.140314	MAPK1	http://www.broadinstitute.org/gsea/msigdb/cards/PID_AR_NONGENOMIC_PATHWAY
Canonical_Pathways	PID_AVB3_OPN_PATHWAY	31	1	0.0105364	0.140314	MAPK1	http://www.broadinstitute.org/gsea/msigdb/cards/PID_AVB3_OPN_PATHWAY
Canonical_Pathways	ST_ERK1_ERK2_MAPK_PATHWAY	32	1	0.0108745	0.140314	MAPK1	http://www.broadinstitute.org/gsea/msigdb/cards/ST_ERK1_ERK2_MAPK_PATHWAY
Canonical_Pathways	REACTOME_THROMBIN_SIGNALLING_THROUGH_PROTEINASE_ACTIVATED_RECEPTORS_PARS	32	1	0.0108745	0.140314	MAPK1	http://www.broadinstitute.org/gsea/msigdb/cards/REACTOME_THROMBIN_SIGNALLING_THROUGH_PROTEINASE_ACTIVATED_RECEPTORS_PARS
Canonical_Pathways	PID_NETRIN_PATHWAY	32	1	0.0108745	0.140314	MAPK1	http://www.broadinstitute.org/gsea/msigdb/cards/PID_NETRIN_PATHWAY
Canonical_Pathways	PID_SYNDECAN_2_PATHWAY	33	1	0.0112126	0.140314	MAPK1	http://www.broadinstitute.org/gsea/msigdb/cards/PID_SYNDECAN_2_PATHWAY
Canonical_Pathways	REACTOME_POST_NMDA_RECEPTOR_ACTIVATION_EVENTS	33	1	0.0112126	0.140314	MAPK1	http://www.broadinstitute.org/gsea/msigdb/cards/REACTOME_POST_NMDA_RECEPTOR_ACTIVATION_EVENTS
Canonical_Pathways	PID_ALPHA_SYNUCLEIN_PATHWAY	33	1	0.0112126	0.140314	MAPK1	http://www.broadinstitute.org/gsea/msigdb/cards/PID_ALPHA_SYNUCLEIN_PATHWAY
Canonical_Pathways	REACTOME_SIGNAL_TRANSDUCTION_BY_L1	34	1	0.0115506	0.140314	MAPK1	http://www.broadinstitute.org/gsea/msigdb/cards/REACTOME_SIGNAL_TRANSDUCTION_BY_L1
Canonical_Pathways	PID_MAPK_TRK_PATHWAY	34	1	0.0115506	0.140314	MAPK1	http://www.broadinstitute.org/gsea/msigdb/cards/PID_MAPK_TRK_PATHWAY
Canonical_Pathways	SIG_CD40PATHWAYMAP	34	1	0.0115506	0.140314	MAPK1	http://www.broadinstitute.org/gsea/msigdb/cards/SIG_CD40PATHWAYMAP
Canonical_Pathways	BIOCARTA_AT1R_PATHWAY	34	1	0.0115506	0.140314	MAPK1	http://www.broadinstitute.org/gsea/msigdb/cards/BIOCARTA_AT1R_PATHWAY
Canonical_Pathways	BIOCARTA_MPR_PATHWAY	34	1	0.0115506	0.140314	MAPK1	http://www.broadinstitute.org/gsea/msigdb/cards/BIOCARTA_MPR_PATHWAY
Canonical_Pathways	PID_ERBB1_RECEPTOR_PROXIMAL_PATHWAY	35	1	0.0118884	0.140314	MAPK1	http://www.broadinstitute.org/gsea/msigdb/cards/PID_ERBB1_RECEPTOR_PROXIMAL_PATHWAY
Canonical_Pathways	ST_G_ALPHA_I_PATHWAY	35	1	0.0118884	0.140314	MAPK1	http://www.broadinstitute.org/gsea/msigdb/cards/ST_G_ALPHA_I_PATHWAY
Canonical_Pathways	KEGG_PRION_DISEASES	35	1	0.0118884	0.140314	MAPK1	http://www.broadinstitute.org/gsea/msigdb/cards/KEGG_PRION_DISEASES
Canonical_Pathways	REACTOME_NEGATIVE_REGULATION_OF_FGFR_SIGNALING	36	1	0.0122262	0.140314	MAPK1	http://www.broadinstitute.org/gsea/msigdb/cards/REACTOME_NEGATIVE_REGULATION_OF_FGFR_SIGNALING
Canonical_Pathways	REACTOME_SIGNALLING_TO_ERKS	36	1	0.0122262	0.140314	MAPK1	http://www.broadinstitute.org/gsea/msigdb/cards/REACTOME_SIGNALLING_TO_ERKS
Canonical_Pathways	BIOCARTA_AGR_PATHWAY	36	1	0.0122262	0.140314	MAPK1	http://www.broadinstitute.org/gsea/msigdb/cards/BIOCARTA_AGR_PATHWAY
Canonical_Pathways	ST_ADRENERGIC	36	1	0.0122262	0.140314	MAPK1	http://www.broadinstitute.org/gsea/msigdb/cards/ST_ADRENERGIC
Canonical_Pathways	REACTOME_FRS2_MEDIATED_CASCADE	36	1	0.0122262	0.140314	MAPK1	http://www.broadinstitute.org/gsea/msigdb/cards/REACTOME_FRS2_MEDIATED_CASCADE
Canonical_Pathways	BIOCARTA_MET_PATHWAY	37	1	0.0125639	0.140314	MAPK1	http://www.broadinstitute.org/gsea/msigdb/cards/BIOCARTA_MET_PATHWAY
Canonical_Pathways	BIOCARTA_FMLP_PATHWAY	37	1	0.0125639	0.140314	MAPK1	http://www.broadinstitute.org/gsea/msigdb/cards/BIOCARTA_FMLP_PATHWAY
Canonical_Pathways	ST_P38_MAPK_PATHWAY	37	1	0.0125639	0.140314	MAPK1	http://www.broadinstitute.org/gsea/msigdb/cards/ST_P38_MAPK_PATHWAY
Canonical_Pathways	REACTOME_ACTIVATION_OF_NMDA_RECEPTOR_UPON_GLUTAMATE_BINDING_AND_POSTSYNAPTIC_EVENTS	37	1	0.0125639	0.140314	MAPK1	http://www.broadinstitute.org/gsea/msigdb/cards/REACTOME_ACTIVATION_OF_NMDA_RECEPTOR_UPON_GLUTAMATE_BINDING_AND_POSTSYNAPTIC_EVENTS
Canonical_Pathways	PID_GMCSF_PATHWAY	37	1	0.0125639	0.140314	MAPK1	http://www.broadinstitute.org/gsea/msigdb/cards/PID_GMCSF_PATHWAY
Canonical_Pathways	BIOCARTA_INTEGRIN_PATHWAY	38	1	0.0129014	0.140541	MAPK1	http://www.broadinstitute.org/gsea/msigdb/cards/BIOCARTA_INTEGRIN_PATHWAY
Canonical_Pathways	BIOCARTA_IL2RB_PATHWAY	38	1	0.0129014	0.140541	MAPK1	http://www.broadinstitute.org/gsea/msigdb/cards/BIOCARTA_IL2RB_PATHWAY
Canonical_Pathways	PID_ERBB4_PATHWAY	38	1	0.0129014	0.140541	MAPK1	http://www.broadinstitute.org/gsea/msigdb/cards/PID_ERBB4_PATHWAY
Canonical_Pathways	PID_RET_PATHWAY	39	1	0.0132388	0.141891	MAPK1	http://www.broadinstitute.org/gsea/msigdb/cards/PID_RET_PATHWAY
Canonical_Pathways	BIOCARTA_FCER1_PATHWAY	39	1	0.0132388	0.141891	MAPK1	http://www.broadinstitute.org/gsea/msigdb/cards/BIOCARTA_FCER1_PATHWAY
Canonical_Pathways	PID_IFNG_PATHWAY	40	1	0.0135762	0.142069	MAPK1	http://www.broadinstitute.org/gsea/msigdb/cards/PID_IFNG_PATHWAY
Canonical_Pathways	ST_B_CELL_ANTIGEN_RECEPTOR	40	1	0.0135762	0.142069	MAPK1	http://www.broadinstitute.org/gsea/msigdb/cards/ST_B_CELL_ANTIGEN_RECEPTOR
Canonical_Pathways	PID_EPHB_FWD_PATHWAY	40	1	0.0135762	0.142069	MAPK1	http://www.broadinstitute.org/gsea/msigdb/cards/PID_EPHB_FWD_PATHWAY
Canonical_Pathways	REACTOME_IL_2_SIGNALING	41	1	0.0139134	0.143477	MAPK1	http://www.broadinstitute.org/gsea/msigdb/cards/REACTOME_IL_2_SIGNALING
Canonical_Pathways	KEGG_ALDOSTERONE_REGULATED_SODIUM_REABSORPTION	42	1	0.0142505	0.143477	MAPK1	http://www.broadinstitute.org/gsea/msigdb/cards/KEGG_ALDOSTERONE_REGULATED_SODIUM_REABSORPTION
Canonical_Pathways	PID_ECADHERIN_STABILIZATION_PATHWAY	42	1	0.0142505	0.143477	CAMSAP3	http://www.broadinstitute.org/gsea/msigdb/cards/PID_ECADHERIN_STABILIZATION_PATHWAY
Canonical_Pathways	KEGG_BLADDER_CANCER	42	1	0.0142505	0.143477	MAPK1	http://www.broadinstitute.org/gsea/msigdb/cards/KEGG_BLADDER_CANCER
Canonical_Pathways	REACTOME_PLC_BETA_MEDIATED_EVENTS	42	1	0.0142505	0.143477	MAPK1	http://www.broadinstitute.org/gsea/msigdb/cards/REACTOME_PLC_BETA_MEDIATED_EVENTS
Curated_gene_sets	REACTOME_TRANS_GOLGI_NETWORK_VESICLE_BUDDING	59	2	0.00018093	0.143598	PUM1:NAPA	http://www.broadinstitute.org/gsea/msigdb/cards/REACTOME_TRANS_GOLGI_NETWORK_VESICLE_BUDDING
Wikipathways	Non-small cell lung cancer%WikiPathways_20190110%WP4255%Homo sapiens	66	1	0.0223099	0.144568	MAPK1	http://www.wikipathways.org/instance/WP4255_r96916
Canonical_Pathways	PID_CXCR3_PATHWAY	43	1	0.0145876	0.144678	MAPK1	http://www.broadinstitute.org/gsea/msigdb/cards/PID_CXCR3_PATHWAY
Canonical_Pathways	BIOCARTA_BIOPEPTIDES_PATHWAY	43	1	0.0145876	0.144678	MAPK1	http://www.broadinstitute.org/gsea/msigdb/cards/BIOCARTA_BIOPEPTIDES_PATHWAY
Wikipathways	Association Between Physico-Chemical Features and Toxicity Associated Pathways%WikiPathways_20190110%WP3680%Homo sapiens	67	1	0.0226444	0.144805	MAPK1	http://www.wikipathways.org/instance/WP3680_r96435
Canonical_Pathways	REACTOME_NOTCH1_INTRACELLULAR_DOMAIN_REGULATES_TRANSCRIPTION	44	1	0.0149245	0.144963	HIF1A	http://www.broadinstitute.org/gsea/msigdb/cards/REACTOME_NOTCH1_INTRACELLULAR_DOMAIN_REGULATES_TRANSCRIPTION
Canonical_Pathways	PID_ERBB2_ERBB3_PATHWAY	44	1	0.0149245	0.144963	MAPK1	http://www.broadinstitute.org/gsea/msigdb/cards/PID_ERBB2_ERBB3_PATHWAY
Canonical_Pathways	ST_DIFFERENTIATION_PATHWAY_IN_PC12_CELLS	45	1	0.0152613	0.144963	MAPK1	http://www.broadinstitute.org/gsea/msigdb/cards/ST_DIFFERENTIATION_PATHWAY_IN_PC12_CELLS
Canonical_Pathways	ST_T_CELL_SIGNAL_TRANSDUCTION	45	1	0.0152613	0.144963	MAPK1	http://www.broadinstitute.org/gsea/msigdb/cards/ST_T_CELL_SIGNAL_TRANSDUCTION
Canonical_Pathways	SIG_BCR_SIGNALING_PATHWAY	46	1	0.015598	0.144963	MAPK1	http://www.broadinstitute.org/gsea/msigdb/cards/SIG_BCR_SIGNALING_PATHWAY
Canonical_Pathways	PID_PS1_PATHWAY	46	1	0.015598	0.144963	MAPK1	http://www.broadinstitute.org/gsea/msigdb/cards/PID_PS1_PATHWAY
Canonical_Pathways	BIOCARTA_KERATINOCYTE_PATHWAY	46	1	0.015598	0.144963	MAPK1	http://www.broadinstitute.org/gsea/msigdb/cards/BIOCARTA_KERATINOCYTE_PATHWAY
Canonical_Pathways	KEGG_INTESTINAL_IMMUNE_NETWORK_FOR_IGA_PRODUCTION	46	1	0.015598	0.144963	IL15RA	http://www.broadinstitute.org/gsea/msigdb/cards/KEGG_INTESTINAL_IMMUNE_NETWORK_FOR_IGA_PRODUCTION
Canonical_Pathways	PID_SYNDECAN_1_PATHWAY	46	1	0.015598	0.144963	MAPK1	http://www.broadinstitute.org/gsea/msigdb/cards/PID_SYNDECAN_1_PATHWAY
Wikipathways	Human Thyroid Stimulating Hormone (TSH) signaling pathway%WikiPathways_20190110%WP2032%Homo sapiens	68	1	0.0229788	0.145035	MAPK1	http://www.wikipathways.org/instance/WP2032_r89823
Wikipathways	RAC1/PAK1/p38/MMP2 Pathway%WikiPathways_20190110%WP3303%Homo sapiens	69	1	0.023313	0.145258	MAPK1	http://www.wikipathways.org/instance/WP3303_r96971
Canonical_Pathways	KEGG_TYPE_II_DIABETES_MELLITUS	47	1	0.0159346	0.147063	MAPK1	http://www.broadinstitute.org/gsea/msigdb/cards/KEGG_TYPE_II_DIABETES_MELLITUS
Wikipathways	Non-genomic actions of 1,25 dihydroxyvitamin D3%WikiPathways_20190110%WP4341%Homo sapiens	71	1	0.0239813	0.14753	MAPK1	http://www.wikipathways.org/instance/WP4341_r98497
Canonical_Pathways	PID_HES_HEY_PATHWAY	48	1	0.0162711	0.148111	HIF1A	http://www.broadinstitute.org/gsea/msigdb/cards/PID_HES_HEY_PATHWAY
Canonical_Pathways	PID_CERAMIDE_PATHWAY	48	1	0.0162711	0.148111	MAPK1	http://www.broadinstitute.org/gsea/msigdb/cards/PID_CERAMIDE_PATHWAY
Wikipathways	Chromosomal and microsatellite instability in colorectal cancer %WikiPathways_20190110%WP4216%Homo sapiens	73	1	0.0246491	0.149743	MAPK1	http://www.wikipathways.org/instance/WP4216_r97624
Canonical_Pathways	REACTOME_MAP_KINASE_ACTIVATION_IN_TLR_CASCADE	49	1	0.0166074	0.150145	MAPK1	http://www.broadinstitute.org/gsea/msigdb/cards/REACTOME_MAP_KINASE_ACTIVATION_IN_TLR_CASCADE
Wikipathways	Prolactin Signaling Pathway%WikiPathways_20190110%WP2037%Homo sapiens	76	1	0.0256501	0.152024	MAPK1	http://www.wikipathways.org/instance/WP2037_r95112
Wikipathways	Leptin signaling pathway%WikiPathways_20190110%WP2034%Homo sapiens	76	1	0.0256501	0.152024	MAPK1	http://www.wikipathways.org/instance/WP2034_r89856
Canonical_Pathways	PID_ANGIOPOIETIN_RECEPTOR_PATHWAY	50	1	0.0169437	0.15215	MAPK1	http://www.broadinstitute.org/gsea/msigdb/cards/PID_ANGIOPOIETIN_RECEPTOR_PATHWAY
Canonical_Pathways	SIG_INSULIN_RECEPTOR_PATHWAY_IN_CARDIAC_MYOCYTES	51	1	0.0172799	0.154127	MAPK1	http://www.broadinstitute.org/gsea/msigdb/cards/SIG_INSULIN_RECEPTOR_PATHWAY_IN_CARDIAC_MYOCYTES
Canonical_Pathways	KEGG_ENDOMETRIAL_CANCER	52	1	0.017616	0.155044	MAPK1	http://www.broadinstitute.org/gsea/msigdb/cards/KEGG_ENDOMETRIAL_CANCER
Canonical_Pathways	REACTOME_CIRCADIAN_CLOCK	52	1	0.017616	0.155044	HIF1A	http://www.broadinstitute.org/gsea/msigdb/cards/REACTOME_CIRCADIAN_CLOCK
Curated_gene_sets	KEGG_RENAL_CELL_CARCINOMA	70	2	0.000254843	0.156062	HIF1A:MAPK1	http://www.broadinstitute.org/gsea/msigdb/cards/KEGG_RENAL_CELL_CARCINOMA
Curated_gene_sets	NATSUME_RESPONSE_TO_INTERFERON_BETA_UP	71	2	0.00026218	0.156062	IL15RA:MAPK1	http://www.broadinstitute.org/gsea/msigdb/cards/NATSUME_RESPONSE_TO_INTERFERON_BETA_UP
Canonical_Pathways	BIOCARTA_NFAT_PATHWAY	54	1	0.0182878	0.158658	MAPK1	http://www.broadinstitute.org/gsea/msigdb/cards/BIOCARTA_NFAT_PATHWAY
Canonical_Pathways	KEGG_NON_SMALL_CELL_LUNG_CANCER	54	1	0.0182878	0.158658	MAPK1	http://www.broadinstitute.org/gsea/msigdb/cards/KEGG_NON_SMALL_CELL_LUNG_CANCER
Canonical_Pathways	PID_FGF_PATHWAY	55	1	0.0186235	0.158658	MAPK1	http://www.broadinstitute.org/gsea/msigdb/cards/PID_FGF_PATHWAY
Canonical_Pathways	PID_TGFBR_PATHWAY	55	1	0.0186235	0.158658	BAMBI	http://www.broadinstitute.org/gsea/msigdb/cards/PID_TGFBR_PATHWAY
Canonical_Pathways	PID_IL2_1PATHWAY	55	1	0.0186235	0.158658	MAPK1	http://www.broadinstitute.org/gsea/msigdb/cards/PID_IL2_1PATHWAY
Canonical_Pathways	REACTOME_AUTODEGRADATION_OF_CDH1_BY_CDH1_APC_C	56	1	0.0189592	0.160489	ANAPC11	http://www.broadinstitute.org/gsea/msigdb/cards/REACTOME_AUTODEGRADATION_OF_CDH1_BY_CDH1_APC_C
Canonical_Pathways	BIOCARTA_PPARA_PATHWAY	57	1	0.0192947	0.161275	MAPK1	http://www.broadinstitute.org/gsea/msigdb/cards/BIOCARTA_PPARA_PATHWAY
Canonical_Pathways	KEGG_ACUTE_MYELOID_LEUKEMIA	57	1	0.0192947	0.161275	MAPK1	http://www.broadinstitute.org/gsea/msigdb/cards/KEGG_ACUTE_MYELOID_LEUKEMIA
Wikipathways	Signaling Pathways in Glioblastoma%WikiPathways_20190110%WP2261%Homo sapiens	83	1	0.027982	0.163821	MAPK1	http://www.wikipathways.org/instance/WP2261_r98349
Wikipathways	Viral Acute Myocarditis%WikiPathways_20190110%WP4298%Homo sapiens	84	1	0.0283147	0.163821	MAPK1	http://www.wikipathways.org/instance/WP4298_r98082
Canonical_Pathways	PID_ATF2_PATHWAY	59	1	0.0199655	0.164808	MAPK1	http://www.broadinstitute.org/gsea/msigdb/cards/PID_ATF2_PATHWAY
Canonical_Pathways	PID_FAK_PATHWAY	59	1	0.0199655	0.164808	MAPK1	http://www.broadinstitute.org/gsea/msigdb/cards/PID_FAK_PATHWAY
Wikipathways	Pathways in clear cell renal cell carcinoma%WikiPathways_20190110%WP4018%Homo sapiens	86	1	0.0289798	0.165696	HIF1A	http://www.wikipathways.org/instance/WP4018_r98359
Canonical_Pathways	KEGG_COLORECTAL_CANCER	62	1	0.0209709	0.168816	MAPK1	http://www.broadinstitute.org/gsea/msigdb/cards/KEGG_COLORECTAL_CANCER
Canonical_Pathways	PID_TRKR_PATHWAY	62	1	0.0209709	0.168816	MAPK1	http://www.broadinstitute.org/gsea/msigdb/cards/PID_TRKR_PATHWAY
Canonical_Pathways	PID_FCER1_PATHWAY	62	1	0.0209709	0.168816	MAPK1	http://www.broadinstitute.org/gsea/msigdb/cards/PID_FCER1_PATHWAY
Canonical_Pathways	KEGG_NOD_LIKE_RECEPTOR_SIGNALING_PATHWAY	62	1	0.0209709	0.168816	MAPK1	http://www.broadinstitute.org/gsea/msigdb/cards/KEGG_NOD_LIKE_RECEPTOR_SIGNALING_PATHWAY
Canonical_Pathways	PID_ENDOTHELIN_PATHWAY	63	1	0.0213058	0.168816	MAPK1	http://www.broadinstitute.org/gsea/msigdb/cards/PID_ENDOTHELIN_PATHWAY
Canonical_Pathways	REACTOME_APC_C_CDH1_MEDIATED_DEGRADATION_OF_CDC20_AND_OTHER_APC_C_CDH1_TARGETED_PROTEINS_IN_LATE_MITOSIS_EARLY_G1	64	1	0.0216406	0.168816	ANAPC11	http://www.broadinstitute.org/gsea/msigdb/cards/REACTOME_APC_C_CDH1_MEDIATED_DEGRADATION_OF_CDC20_AND_OTHER_APC_C_CDH1_TARGETED_PROTEINS_IN_LATE_MITOSIS_EARLY_G1
Canonical_Pathways	REACTOME_NCAM_SIGNALING_FOR_NEURITE_OUT_GROWTH	64	1	0.0216406	0.168816	MAPK1	http://www.broadinstitute.org/gsea/msigdb/cards/REACTOME_NCAM_SIGNALING_FOR_NEURITE_OUT_GROWTH
Canonical_Pathways	PID_CD8_TCR_DOWNSTREAM_PATHWAY	65	1	0.0219753	0.168816	MAPK1	http://www.broadinstitute.org/gsea/msigdb/cards/PID_CD8_TCR_DOWNSTREAM_PATHWAY
Canonical_Pathways	KEGG_GLIOMA	65	1	0.0219753	0.168816	MAPK1	http://www.broadinstitute.org/gsea/msigdb/cards/KEGG_GLIOMA
Canonical_Pathways	REACTOME_APC_C_CDC20_MEDIATED_DEGRADATION_OF_MITOTIC_PROTEINS	65	1	0.0219753	0.168816	ANAPC11	http://www.broadinstitute.org/gsea/msigdb/cards/REACTOME_APC_C_CDC20_MEDIATED_DEGRADATION_OF_MITOTIC_PROTEINS
Canonical_Pathways	PID_BCR_5PATHWAY	65	1	0.0219753	0.168816	MAPK1	http://www.broadinstitute.org/gsea/msigdb/cards/PID_BCR_5PATHWAY
Canonical_Pathways	ST_FAS_SIGNALING_PATHWAY	65	1	0.0219753	0.168816	MAPK1	http://www.broadinstitute.org/gsea/msigdb/cards/ST_FAS_SIGNALING_PATHWAY
Wikipathways	Pancreatic adenocarcinoma pathway%WikiPathways_20190110%WP4263%Homo sapiens	89	1	0.0299767	0.169403	MAPK1	http://www.wikipathways.org/instance/WP4263_r97005
Canonical_Pathways	PID_HIF1_TFPATHWAY	66	1	0.0223099	0.169876	HIF1A	http://www.broadinstitute.org/gsea/msigdb/cards/PID_HIF1_TFPATHWAY
Canonical_Pathways	PID_TELOMERASE_PATHWAY	68	1	0.0229788	0.169876	MAPK1	http://www.broadinstitute.org/gsea/msigdb/cards/PID_TELOMERASE_PATHWAY
Canonical_Pathways	REACTOME_SIGNALING_BY_NOTCH1	68	1	0.0229788	0.169876	HIF1A	http://www.broadinstitute.org/gsea/msigdb/cards/REACTOME_SIGNALING_BY_NOTCH1
Canonical_Pathways	PID_VEGFR1_2_PATHWAY	69	1	0.023313	0.169876	MAPK1	http://www.broadinstitute.org/gsea/msigdb/cards/PID_VEGFR1_2_PATHWAY
Canonical_Pathways	PID_MTOR_4PATHWAY	69	1	0.023313	0.169876	MAPK1	http://www.broadinstitute.org/gsea/msigdb/cards/PID_MTOR_4PATHWAY
Canonical_Pathways	REACTOME_NFKB_AND_MAP_KINASES_ACTIVATION_MEDIATED_BY_TLR4_SIGNALING_REPERTOIRE	70	1	0.0236472	0.169876	MAPK1	http://www.broadinstitute.org/gsea/msigdb/cards/REACTOME_NFKB_AND_MAP_KINASES_ACTIVATION_MEDIATED_BY_TLR4_SIGNALING_REPERTOIRE
Canonical_Pathways	PID_AP1_PATHWAY	70	1	0.0236472	0.169876	HIF1A	http://www.broadinstitute.org/gsea/msigdb/cards/PID_AP1_PATHWAY
Canonical_Pathways	KEGG_LONG_TERM_POTENTIATION	70	1	0.0236472	0.169876	MAPK1	http://www.broadinstitute.org/gsea/msigdb/cards/KEGG_LONG_TERM_POTENTIATION
Canonical_Pathways	KEGG_LONG_TERM_DEPRESSION	70	1	0.0236472	0.169876	MAPK1	http://www.broadinstitute.org/gsea/msigdb/cards/KEGG_LONG_TERM_DEPRESSION
Canonical_Pathways	PID_CDC42_PATHWAY	70	1	0.0236472	0.169876	MAPK1	http://www.broadinstitute.org/gsea/msigdb/cards/PID_CDC42_PATHWAY
Canonical_Pathways	KEGG_LEISHMANIA_INFECTION	70	1	0.0236472	0.169876	MAPK1	http://www.broadinstitute.org/gsea/msigdb/cards/KEGG_LEISHMANIA_INFECTION
Canonical_Pathways	KEGG_PANCREATIC_CANCER	70	1	0.0236472	0.169876	MAPK1	http://www.broadinstitute.org/gsea/msigdb/cards/KEGG_PANCREATIC_CANCER
Wikipathways	ErbB Signaling Pathway%WikiPathways_20190110%WP673%Homo sapiens	91	1	0.0306408	0.170943	MAPK1	http://www.wikipathways.org/instance/WP673_r102179
Wikipathways	TNF alpha Signaling Pathway%WikiPathways_20190110%WP231%Homo sapiens	93	1	0.0313044	0.170943	MAPK1	http://www.wikipathways.org/instance/WP231_r89895
Wikipathways	Corticotropin-releasing hormone signaling pathway%WikiPathways_20190110%WP2355%Homo sapiens	93	1	0.0313044	0.170943	MAPK1	http://www.wikipathways.org/instance/WP2355_r97622
Canonical_Pathways	KEGG_MELANOMA	71	1	0.0239813	0.17135	MAPK1	http://www.broadinstitute.org/gsea/msigdb/cards/KEGG_MELANOMA
Canonical_Pathways	REACTOME_TRIF_MEDIATED_TLR3_SIGNALING	72	1	0.0243152	0.172807	MAPK1	http://www.broadinstitute.org/gsea/msigdb/cards/REACTOME_TRIF_MEDIATED_TLR3_SIGNALING
Canonical_Pathways	KEGG_CHRONIC_MYELOID_LEUKEMIA	73	1	0.0246491	0.173326	MAPK1	http://www.broadinstitute.org/gsea/msigdb/cards/KEGG_CHRONIC_MYELOID_LEUKEMIA
Canonical_Pathways	KEGG_ADHERENS_JUNCTION	73	1	0.0246491	0.173326	MAPK1	http://www.broadinstitute.org/gsea/msigdb/cards/KEGG_ADHERENS_JUNCTION
Canonical_Pathways	PID_AVB3_INTEGRIN_PATHWAY	75	1	0.0253165	0.17433	MAPK1	http://www.broadinstitute.org/gsea/msigdb/cards/PID_AVB3_INTEGRIN_PATHWAY
Canonical_Pathways	KEGG_B_CELL_RECEPTOR_SIGNALING_PATHWAY	75	1	0.0253165	0.17433	MAPK1	http://www.broadinstitute.org/gsea/msigdb/cards/KEGG_B_CELL_RECEPTOR_SIGNALING_PATHWAY
Canonical_Pathways	REACTOME_SIGNALING_BY_SCF_KIT	75	1	0.0253165	0.17433	MAPK1	http://www.broadinstitute.org/gsea/msigdb/cards/REACTOME_SIGNALING_BY_SCF_KIT
Canonical_Pathways	REACTOME_TRAF6_MEDIATED_INDUCTION_OF_NFKB_AND_MAP_KINASES_UPON_TLR7_8_OR_9_ACTIVATION	75	1	0.0253165	0.17433	MAPK1	http://www.broadinstitute.org/gsea/msigdb/cards/REACTOME_TRAF6_MEDIATED_INDUCTION_OF_NFKB_AND_MAP_KINASES_UPON_TLR7_8_OR_9_ACTIVATION
Canonical_Pathways	KEGG_VEGF_SIGNALING_PATHWAY	76	1	0.0256501	0.175716	MAPK1	http://www.broadinstitute.org/gsea/msigdb/cards/KEGG_VEGF_SIGNALING_PATHWAY
KEGG	KEGG_PATHWAYS_IN_CANCER	325	2	0.0052936	0.17617	HIF1A:MAPK1	http://www.broadinstitute.org/gsea/msigdb/cards/KEGG_PATHWAYS_IN_CANCER
KEGG	KEGG_DORSO_VENTRAL_AXIS_FORMATION	24	1	0.00816611	0.17617	MAPK1	http://www.broadinstitute.org/gsea/msigdb/cards/KEGG_DORSO_VENTRAL_AXIS_FORMATION
KEGG	KEGG_THYROID_CANCER	29	1	0.00985967	0.17617	MAPK1	http://www.broadinstitute.org/gsea/msigdb/cards/KEGG_THYROID_CANCER
KEGG	KEGG_PRION_DISEASES	35	1	0.0118884	0.17617	MAPK1	http://www.broadinstitute.org/gsea/msigdb/cards/KEGG_PRION_DISEASES
KEGG	KEGG_ALDOSTERONE_REGULATED_SODIUM_REABSORPTION	42	1	0.0142505	0.17617	MAPK1	http://www.broadinstitute.org/gsea/msigdb/cards/KEGG_ALDOSTERONE_REGULATED_SODIUM_REABSORPTION
KEGG	KEGG_BLADDER_CANCER	42	1	0.0142505	0.17617	MAPK1	http://www.broadinstitute.org/gsea/msigdb/cards/KEGG_BLADDER_CANCER
KEGG	KEGG_INTESTINAL_IMMUNE_NETWORK_FOR_IGA_PRODUCTION	46	1	0.015598	0.17617	IL15RA	http://www.broadinstitute.org/gsea/msigdb/cards/KEGG_INTESTINAL_IMMUNE_NETWORK_FOR_IGA_PRODUCTION
KEGG	KEGG_TYPE_II_DIABETES_MELLITUS	47	1	0.0159346	0.17617	MAPK1	http://www.broadinstitute.org/gsea/msigdb/cards/KEGG_TYPE_II_DIABETES_MELLITUS
KEGG	KEGG_ENDOMETRIAL_CANCER	52	1	0.017616	0.17617	MAPK1	http://www.broadinstitute.org/gsea/msigdb/cards/KEGG_ENDOMETRIAL_CANCER
KEGG	KEGG_NON_SMALL_CELL_LUNG_CANCER	54	1	0.0182878	0.17617	MAPK1	http://www.broadinstitute.org/gsea/msigdb/cards/KEGG_NON_SMALL_CELL_LUNG_CANCER
KEGG	KEGG_ACUTE_MYELOID_LEUKEMIA	57	1	0.0192947	0.17617	MAPK1	http://www.broadinstitute.org/gsea/msigdb/cards/KEGG_ACUTE_MYELOID_LEUKEMIA
KEGG	KEGG_COLORECTAL_CANCER	62	1	0.0209709	0.17617	MAPK1	http://www.broadinstitute.org/gsea/msigdb/cards/KEGG_COLORECTAL_CANCER
KEGG	KEGG_NOD_LIKE_RECEPTOR_SIGNALING_PATHWAY	62	1	0.0209709	0.17617	MAPK1	http://www.broadinstitute.org/gsea/msigdb/cards/KEGG_NOD_LIKE_RECEPTOR_SIGNALING_PATHWAY
KEGG	KEGG_GLIOMA	65	1	0.0219753	0.17617	MAPK1	http://www.broadinstitute.org/gsea/msigdb/cards/KEGG_GLIOMA
KEGG	KEGG_LONG_TERM_POTENTIATION	70	1	0.0236472	0.17617	MAPK1	http://www.broadinstitute.org/gsea/msigdb/cards/KEGG_LONG_TERM_POTENTIATION
KEGG	KEGG_LONG_TERM_DEPRESSION	70	1	0.0236472	0.17617	MAPK1	http://www.broadinstitute.org/gsea/msigdb/cards/KEGG_LONG_TERM_DEPRESSION
KEGG	KEGG_PANCREATIC_CANCER	70	1	0.0236472	0.17617	MAPK1	http://www.broadinstitute.org/gsea/msigdb/cards/KEGG_PANCREATIC_CANCER
KEGG	KEGG_LEISHMANIA_INFECTION	70	1	0.0236472	0.17617	MAPK1	http://www.broadinstitute.org/gsea/msigdb/cards/KEGG_LEISHMANIA_INFECTION
KEGG	KEGG_MELANOMA	71	1	0.0239813	0.17617	MAPK1	http://www.broadinstitute.org/gsea/msigdb/cards/KEGG_MELANOMA
KEGG	KEGG_ADHERENS_JUNCTION	73	1	0.0246491	0.17617	MAPK1	http://www.broadinstitute.org/gsea/msigdb/cards/KEGG_ADHERENS_JUNCTION
KEGG	KEGG_CHRONIC_MYELOID_LEUKEMIA	73	1	0.0246491	0.17617	MAPK1	http://www.broadinstitute.org/gsea/msigdb/cards/KEGG_CHRONIC_MYELOID_LEUKEMIA
KEGG	KEGG_B_CELL_RECEPTOR_SIGNALING_PATHWAY	75	1	0.0253165	0.17617	MAPK1	http://www.broadinstitute.org/gsea/msigdb/cards/KEGG_B_CELL_RECEPTOR_SIGNALING_PATHWAY
KEGG	KEGG_VEGF_SIGNALING_PATHWAY	76	1	0.0256501	0.17617	MAPK1	http://www.broadinstitute.org/gsea/msigdb/cards/KEGG_VEGF_SIGNALING_PATHWAY
KEGG	KEGG_FC_EPSILON_RI_SIGNALING_PATHWAY	79	1	0.0266501	0.17617	MAPK1	http://www.broadinstitute.org/gsea/msigdb/cards/KEGG_FC_EPSILON_RI_SIGNALING_PATHWAY
KEGG	KEGG_TGF_BETA_SIGNALING_PATHWAY	85	1	0.0286473	0.17617	MAPK1	http://www.broadinstitute.org/gsea/msigdb/cards/KEGG_TGF_BETA_SIGNALING_PATHWAY
KEGG	KEGG_ERBB_SIGNALING_PATHWAY	87	1	0.0293122	0.17617	MAPK1	http://www.broadinstitute.org/gsea/msigdb/cards/KEGG_ERBB_SIGNALING_PATHWAY
KEGG	KEGG_PROSTATE_CANCER	89	1	0.0299767	0.17617	MAPK1	http://www.broadinstitute.org/gsea/msigdb/cards/KEGG_PROSTATE_CANCER
KEGG	KEGG_GAP_JUNCTION	90	1	0.0303088	0.17617	MAPK1	http://www.broadinstitute.org/gsea/msigdb/cards/KEGG_GAP_JUNCTION
Canonical_Pathways	REACTOME_OPIOID_SIGNALLING	77	1	0.0259835	0.176184	MAPK1	http://www.broadinstitute.org/gsea/msigdb/cards/REACTOME_OPIOID_SIGNALLING
Canonical_Pathways	REACTOME_REGULATION_OF_MITOTIC_CELL_CYCLE	77	1	0.0259835	0.176184	ANAPC11	http://www.broadinstitute.org/gsea/msigdb/cards/REACTOME_REGULATION_OF_MITOTIC_CELL_CYCLE
KEGG	KEGG_FC_GAMMA_R_MEDIATED_PHAGOCYTOSIS	96	1	0.0322991	0.177143	MAPK1	http://www.broadinstitute.org/gsea/msigdb/cards/KEGG_FC_GAMMA_R_MEDIATED_PHAGOCYTOSIS
KEGG	KEGG_GNRH_SIGNALING_PATHWAY	101	1	0.0339548	0.177143	MAPK1	http://www.broadinstitute.org/gsea/msigdb/cards/KEGG_GNRH_SIGNALING_PATHWAY
KEGG	KEGG_MELANOGENESIS	101	1	0.0339548	0.177143	MAPK1	http://www.broadinstitute.org/gsea/msigdb/cards/KEGG_MELANOGENESIS
KEGG	KEGG_TOLL_LIKE_RECEPTOR_SIGNALING_PATHWAY	102	1	0.0342857	0.177143	MAPK1	http://www.broadinstitute.org/gsea/msigdb/cards/KEGG_TOLL_LIKE_RECEPTOR_SIGNALING_PATHWAY
Wikipathways	B Cell Receptor Signaling Pathway%WikiPathways_20190110%WP23%Homo sapiens	98	1	0.0329617	0.177993	MAPK1	http://www.wikipathways.org/instance/WP23_r92558
Curated_gene_sets	ROSS_ACUTE_MYELOID_LEUKEMIA_CBF	82	2	0.000349651	0.17825	IL15RA:HIF1A	http://www.broadinstitute.org/gsea/msigdb/cards/ROSS_ACUTE_MYELOID_LEUKEMIA_CBF
Curated_gene_sets	KEGG_PROGESTERONE_MEDIATED_OOCYTE_MATURATION	85	2	0.000375654	0.17825	ANAPC11:MAPK1	http://www.broadinstitute.org/gsea/msigdb/cards/KEGG_PROGESTERONE_MEDIATED_OOCYTE_MATURATION
Curated_gene_sets	SWEET_KRAS_ONCOGENIC_SIGNATURE	89	2	0.000411749	0.17825	HIF1A:MAPK1	http://www.broadinstitute.org/gsea/msigdb/cards/SWEET_KRAS_ONCOGENIC_SIGNATURE
Wikipathways	MicroRNAs in cardiomyocyte hypertrophy%WikiPathways_20190110%WP1544%Homo sapiens	100	1	0.0336239	0.179574	MAPK1	http://www.wikipathways.org/instance/WP1544_r98337
Canonical_Pathways	KEGG_FC_EPSILON_RI_SIGNALING_PATHWAY	79	1	0.0266501	0.179787	MAPK1	http://www.broadinstitute.org/gsea/msigdb/cards/KEGG_FC_EPSILON_RI_SIGNALING_PATHWAY
Wikipathways	Integrin-mediated Cell Adhesion%WikiPathways_20190110%WP185%Homo sapiens	102	1	0.0342857	0.180899	MAPK1	http://www.wikipathways.org/instance/WP185_r88160
Wikipathways	Toll-like Receptor Signaling Pathway%WikiPathways_20190110%WP75%Homo sapiens	103	1	0.0346164	0.180899	MAPK1	http://www.wikipathways.org/instance/WP75_r96020
Canonical_Pathways	PID_MET_PATHWAY	80	1	0.0269832	0.181115	MAPK1	http://www.broadinstitute.org/gsea/msigdb/cards/PID_MET_PATHWAY
KEGG	KEGG_T_CELL_RECEPTOR_SIGNALING_PATHWAY	108	1	0.0362685	0.182323	MAPK1	http://www.broadinstitute.org/gsea/msigdb/cards/KEGG_T_CELL_RECEPTOR_SIGNALING_PATHWAY
Wikipathways	Senescence and Autophagy in Cancer%WikiPathways_20190110%WP615%Homo sapiens	105	1	0.0352776	0.182393	MAPK1	http://www.wikipathways.org/instance/WP615_r98554
Canonical_Pathways	REACTOME_MYD88_MAL_CASCADE_INITIATED_ON_PLASMA_MEMBRANE	81	1	0.0273162	0.182429	MAPK1	http://www.broadinstitute.org/gsea/msigdb/cards/REACTOME_MYD88_MAL_CASCADE_INITIATED_ON_PLASMA_MEMBRANE
Canonical_Pathways	PID_REG_GR_PATHWAY	82	1	0.0276492	0.182815	MAPK1	http://www.broadinstitute.org/gsea/msigdb/cards/PID_REG_GR_PATHWAY
Canonical_Pathways	ST_INTEGRIN_SIGNALING_PATHWAY	82	1	0.0276492	0.182815	MAPK1	http://www.broadinstitute.org/gsea/msigdb/cards/ST_INTEGRIN_SIGNALING_PATHWAY
Canonical_Pathways	REACTOME_L1CAM_INTERACTIONS	83	1	0.027982	0.184099	MAPK1	http://www.broadinstitute.org/gsea/msigdb/cards/REACTOME_L1CAM_INTERACTIONS
Canonical_Pathways	REACTOME_INSULIN_RECEPTOR_SIGNALLING_CASCADE	84	1	0.0283147	0.185371	MAPK1	http://www.broadinstitute.org/gsea/msigdb/cards/REACTOME_INSULIN_RECEPTOR_SIGNALLING_CASCADE
Canonical_Pathways	KEGG_TGF_BETA_SIGNALING_PATHWAY	85	1	0.0286473	0.186629	MAPK1	http://www.broadinstitute.org/gsea/msigdb/cards/KEGG_TGF_BETA_SIGNALING_PATHWAY
Reactome	REACTOME_MEMBRANE_TRAFFICKING	127	2	0.000835225	0.187647	PUM1:NAPA	http://www.broadinstitute.org/gsea/msigdb/cards/REACTOME_MEMBRANE_TRAFFICKING
Canonical_Pathways	REACTOME_SIGNALING_BY_ERBB4	87	1	0.0293122	0.188193	MAPK1	http://www.broadinstitute.org/gsea/msigdb/cards/REACTOME_SIGNALING_BY_ERBB4
Canonical_Pathways	BIOCARTA_MAPK_PATHWAY	87	1	0.0293122	0.188193	MAPK1	http://www.broadinstitute.org/gsea/msigdb/cards/BIOCARTA_MAPK_PATHWAY
Canonical_Pathways	KEGG_ERBB_SIGNALING_PATHWAY	87	1	0.0293122	0.188193	MAPK1	http://www.broadinstitute.org/gsea/msigdb/cards/KEGG_ERBB_SIGNALING_PATHWAY
KEGG	KEGG_VASCULAR_SMOOTH_MUSCLE_CONTRACTION	115	1	0.0385771	0.188825	MAPK1	http://www.broadinstitute.org/gsea/msigdb/cards/KEGG_VASCULAR_SMOOTH_MUSCLE_CONTRACTION
Wikipathways	DNA Damage Response (only ATM dependent)%WikiPathways_20190110%WP710%Homo sapiens	110	1	0.0369286	0.188919	MAPK1	http://www.wikipathways.org/instance/WP710_r95580
KEGG	KEGG_CELL_CYCLE	124	1	0.0415379	0.189306	ANAPC11	http://www.broadinstitute.org/gsea/msigdb/cards/KEGG_CELL_CYCLE
KEGG	KEGG_NEUROTROPHIN_SIGNALING_PATHWAY	126	1	0.0421947	0.189306	MAPK1	http://www.broadinstitute.org/gsea/msigdb/cards/KEGG_NEUROTROPHIN_SIGNALING_PATHWAY
KEGG	KEGG_SPLICEOSOME	127	1	0.0425229	0.189306	PUF60	http://www.broadinstitute.org/gsea/msigdb/cards/KEGG_SPLICEOSOME
KEGG	KEGG_AXON_GUIDANCE	129	1	0.0431791	0.189306	MAPK1	http://www.broadinstitute.org/gsea/msigdb/cards/KEGG_AXON_GUIDANCE
KEGG	KEGG_NATURAL_KILLER_CELL_MEDIATED_CYTOTOXICITY	132	1	0.0441626	0.189306	MAPK1	http://www.broadinstitute.org/gsea/msigdb/cards/KEGG_NATURAL_KILLER_CELL_MEDIATED_CYTOTOXICITY
KEGG	KEGG_UBIQUITIN_MEDIATED_PROTEOLYSIS	134	1	0.0448178	0.189306	ANAPC11	http://www.broadinstitute.org/gsea/msigdb/cards/KEGG_UBIQUITIN_MEDIATED_PROTEOLYSIS
KEGG	KEGG_INSULIN_SIGNALING_PATHWAY	137	1	0.0457998	0.189306	MAPK1	http://www.broadinstitute.org/gsea/msigdb/cards/KEGG_INSULIN_SIGNALING_PATHWAY
Canonical_Pathways	KEGG_PROSTATE_CANCER	89	1	0.0299767	0.191534	MAPK1	http://www.broadinstitute.org/gsea/msigdb/cards/KEGG_PROSTATE_CANCER
Canonical_Pathways	KEGG_GAP_JUNCTION	90	1	0.0303088	0.192729	MAPK1	http://www.broadinstitute.org/gsea/msigdb/cards/KEGG_GAP_JUNCTION
Canonical_Pathways	REACTOME_ACTIVATED_TLR4_SIGNALLING	91	1	0.0306408	0.192993	MAPK1	http://www.broadinstitute.org/gsea/msigdb/cards/REACTOME_ACTIVATED_TLR4_SIGNALLING
Canonical_Pathways	REACTOME_DOWNSTREAM_SIGNAL_TRANSDUCTION	91	1	0.0306408	0.192993	MAPK1	http://www.broadinstitute.org/gsea/msigdb/cards/REACTOME_DOWNSTREAM_SIGNAL_TRANSDUCTION
Wikipathways	ESC Pluripotency Pathways%WikiPathways_20190110%WP3931%Homo sapiens	117	1	0.0392358	0.198233	MAPK1	http://www.wikipathways.org/instance/WP3931_r102153
Wikipathways	Spinal Cord Injury%WikiPathways_20190110%WP2431%Homo sapiens	118	1	0.039565	0.198233	MAPK1	http://www.wikipathways.org/instance/WP2431_r101932
GO_cc	GO_CYCLIN_DEPENDENT_PROTEIN_KINASE_HOLOENZYME_COMPLEX	31	2	4.94335e-05	0.019839	CCNL2:PUF60	http://www.broadinstitute.org/gsea/msigdb/cards/GO_CYCLIN_DEPENDENT_PROTEIN_KINASE_HOLOENZYME_COMPLEX
GO_cc	GO_TRANSFERASE_COMPLEX	701	4	6.84103e-05	0.019839	CCNL2:SENP3:ANAPC11:PUF60	http://www.broadinstitute.org/gsea/msigdb/cards/GO_TRANSFERASE_COMPLEX
GO_cc	GO_CELL_PROJECTION_CYTOPLASM	52	2	0.000140405	0.0271449	HIF1A:MAPK1	http://www.broadinstitute.org/gsea/msigdb/cards/GO_CELL_PROJECTION_CYTOPLASM
GO_cc	GO_CATALYTIC_COMPLEX	1035	4	0.000306495	0.0393718	CCNL2:SENP3:ANAPC11:PUF60	http://www.broadinstitute.org/gsea/msigdb/cards/GO_CATALYTIC_COMPLEX
GO_cc	GO_AXON	418	3	0.000339412	0.0393718	HIF1A:NAPA:MAPK1	http://www.broadinstitute.org/gsea/msigdb/cards/GO_AXON
GO_cc	GO_PROTEIN_KINASE_COMPLEX	90	2	0.000421027	0.0406993	CCNL2:PUF60	http://www.broadinstitute.org/gsea/msigdb/cards/GO_PROTEIN_KINASE_COMPLEX
GO_cc	GO_NUCLEOPLASM_PART	705	3	0.00154512	0.128024	CCNL2:HIF1A:SENP3	http://www.broadinstitute.org/gsea/msigdb/cards/GO_NUCLEOPLASM_PART
GO_cc	GO_NUCLEAR_SPECK	193	2	0.00191008	0.138481	CCNL2:HIF1A	http://www.broadinstitute.org/gsea/msigdb/cards/GO_NUCLEAR_SPECK
GO_bp	GO_STEM_CELL_DIFFERENTIATION	190	3	3.30198e-05	0.146476	PUM1:HIF1A:MAPK1	http://www.broadinstitute.org/gsea/msigdb/cards/GO_STEM_CELL_DIFFERENTIATION
GO_cc	GO_AXON_PART	219	2	0.00244879	0.157811	HIF1A:NAPA	http://www.broadinstitute.org/gsea/msigdb/cards/GO_AXON_PART
GO_cc	GO_TRANSFERASE_COMPLEX_TRANSFERRING_PHOSPHORUS_CONTAINING_GROUPS	236	2	0.00283551	0.16446	CCNL2:PUF60	http://www.broadinstitute.org/gsea/msigdb/cards/GO_TRANSFERASE_COMPLEX_TRANSFERRING_PHOSPHORUS_CONTAINING_GROUPS
GO_cc	GO_NEURON_PROJECTION	942	3	0.0035244	0.172394	HIF1A:NAPA:MAPK1	http://www.broadinstitute.org/gsea/msigdb/cards/GO_NEURON_PROJECTION
GO_cc	GO_CELL_PROJECTION_PART	946	3	0.00356677	0.172394	HIF1A:NAPA:MAPK1	http://www.broadinstitute.org/gsea/msigdb/cards/GO_CELL_PROJECTION_PART
GO_cc	GO_CYTOPLASMIC_REGION	287	2	0.00415623	0.185432	HIF1A:MAPK1	http://www.broadinstitute.org/gsea/msigdb/cards/GO_CYTOPLASMIC_REGION
GO_cc	GO_NUCLEAR_CYCLIN_DEPENDENT_PROTEIN_KINASE_HOLOENZYME_COMPLEX	15	1	0.00511101	0.198087	PUF60	http://www.broadinstitute.org/gsea/msigdb/cards/GO_NUCLEAR_CYCLIN_DEPENDENT_PROTEIN_KINASE_HOLOENZYME_COMPLEX
GO_cc	GO_DENDRITE_CYTOPLASM	16	1	0.00545089	0.198087	MAPK1	http://www.broadinstitute.org/gsea/msigdb/cards/GO_DENDRITE_CYTOPLASM
GO_cc	GO_PSEUDOPODIUM	17	1	0.00579067	0.198087	MAPK1	http://www.broadinstitute.org/gsea/msigdb/cards/GO_PSEUDOPODIUM
GO_cc	GO_NUCLEAR_BODY	348	2	0.00604419	0.198087	CCNL2:HIF1A	http://www.broadinstitute.org/gsea/msigdb/cards/GO_NUCLEAR_BODY
GO_cc	GO_CELL_JUNCTION	1149	3	0.00614753	0.198087	CAMSAP3:MAPK1:PUF60	http://www.broadinstitute.org/gsea/msigdb/cards/GO_CELL_JUNCTION

## Sheet: Table S6. GWA_21loci
Table S6. GWAS association of the 21 loci, containing the 22 CpGs, significantly associated to IS. PheGenI information. Trait Related, single nucleotide polymorphism (SNP) associated to the trait; context, location in the gene; Gene and Gene ID associated; location, genomic position; P-Value associated to SNP; Source, source of information; pubmed, pubmed number where the results are published.
Trait	SNP rs	Context	Gene	Gene ID	Gene 2	Gene ID 2	Chromosome	Location	P-Value	Source	PubMed	Analysis ID	Study ID	Study Name	Population
Esthetics	13126272	intron	ACSL1	2180	ACSL1	2180	4	184810786	0.05241	dbGaP	0	2969	338	National Institute on Aging (NIA) SardiNIA Study	European
Fetal Hemoglobin	6816777	intron	ACSL1	2180	ACSL1	2180	4	184769285	0.0002241	dbGaP	0	2914	338	National Institute on Aging (NIA) SardiNIA Study	European
Stroke	9997745	intron	ACSL1	2180	ACSL1	2180	4	184816689	8.5355664E-004	dbGaP	19369658	2887	226	STAMPEED: Cardiovascular Health Study (CHS)	African American
Child Development Disorders, Pervasive	2477779	intergenic	AURKAIP1	54998	CCNL2	81669	1	1384256	9.7201700E-006	dbGaP	0	3681	267	Autism Genome Project (AGP) Consortium - GWAS - Stage I and II	European
Child Development Disorders, Pervasive	2477779	intergenic	AURKAIP1	54998	CCNL2	81669	1	1384256	9.7201700E-006	dbGaP	0	3645	267	Autism Genome Project (AGP) Consortium - GWAS - Stage I and II	European
Alpha-Globulins	2065693	intergenic	BAMBI	25805	LINC00837	100507605	10	28706080	5.4790000E-005	dbGaP	0	3784	215	Genome-Wide Association Analysis of Biomarkers in the InCHIANTI and BLSA	European
Body Height	12569910	intergenic	BAMBI	25805	LINC00837	100507605	10	28706634	1.5980000E-005	dbGaP	0	3010	221	NHLBI Family Heart Study (FamHS)	European
Exhalation	655766	intergenic	BAMBI	25805	LINC00837	100507605	10	28688081	1e-06	NHGRI	26030696				African|European|African American
Platelet Function Tests	2065693	intergenic	BAMBI	25805	LINC00837	100507605	10	28706080	3.1800000E-006	dbGaP	0	3274	375	Genome-Wide Association of Platelet Phenotypes	African American
Platelet Function Tests	787116	intergenic	BAMBI	25805	LINC00837	100507605	10	28745944	2.0887500E-005	dbGaP	0	3438	375	Genome-Wide Association of Platelet Phenotypes	European
Pre-Eclampsia	1248993	intergenic	BAMBI	25805	LINC00837	100507605	10	28738294	6e-06	NHGRI	23551011				European|African American|Hispanic
Angiography	617219	intergenic	BHMT	635	JMY	133746	5	79133771	7e-13	NHGRI	26822151				NR
Betaine	617219	intergenic	BHMT	635	JMY	133746	5	79133771	7e-13	NHGRI	26822151				NR
Child Development Disorders, Pervasive	10916019	intergenic	C1orf95	375057	ITPKB	3707	1	226622445	1.6642900E-005	dbGaP	0	3666	267	Autism Genome Project (AGP) Consortium - GWAS - Stage I and II	European
Astigmatism	12593811	intron	CHSY1	22856	CHSY1	22856	15	101181687	7e-06	NHGRI	23322567				European
Corneal Topography	752092	intron	CHSY1	22856	CHSY1	22856	15	101241729	2e-09	NHGRI	23291589				South Asian|East Asian|European
Iron	8043243	intron	CHSY1	22856	CHSY1	22856	15	101231248	4.8950000E-004	dbGaP	19880490	2876	215	Genome-Wide Association Analysis of Biomarkers in the InCHIANTI and BLSA	European
Iron	752092	intron	CHSY1	22856	CHSY1	22856	15	101241729	6.2850000E-004	dbGaP	19880490	2876	215	Genome-Wide Association Analysis of Biomarkers in the InCHIANTI and BLSA	European
Acne Vulgaris	56091001	intergenic	CRELD2	79174	PIM3	415116	22	49952394	4e-06	NHGRI	24927181				European
Marijuana Abuse	28372448	intergenic	CRELD2	79174	PIM3	415116	22	49957323	8e-06	NHGRI	21668797				African|European|African American
Blood Pressure	1957757	intron	HIF1A	3091	HIF1A	3091	14	61730230	9.4500000E-006	dbGaP	0	3046	221	NHLBI Family Heart Study (FamHS)	European
CD40 Ligand	8005745	intron	HIF1A	3091	HIF1A	3091	14	61718577	4e-06	NHGRI	17903293				European
Uric Acid	4902080	intron	HIF1A	3091	HIF1A	3091	14	61741287	2.15837812502915E-6	dbGaP	17903292	1319	342	NHLBI Framingham SNP Health Association Resource (SHARe)	European
Uric Acid	4902080	intron	HIF1A	3091	HIF1A	3091	14	61741287	7.60544843228549E-6	dbGaP	17903292	1323	342	NHLBI Framingham SNP Health Association Resource (SHARe)	European
Dermatitis, Atopic	6602364	intergenic	IL15RA	3601	IL2RA	3559	10	5996890	1e-10	NHGRI	26482879				East Asian|African|European|African American|Hispanic
Dermatitis, Atopic	6602364	intergenic	IL15RA	3601	IL2RA	3559	10	5996890	2e-06	NHGRI	26482879				East Asian|African|European|African American|Hispanic
Fenofibrate	7911500	intergenic	IL15RA	3601	IL2RA	3559	10	5995763	5e-09	NHGRI	22228203				European
Interleukin-2 Receptor alpha Subunit	7911500	intergenic	IL15RA	3601	IL2RA	3559	10	5995763	1e-100	NHGRI	26293465				African|European|African American
Interleukin-2 Receptor alpha Subunit	8177757	intergenic	IL15RA	3601	IL2RA	3559	10	5985758	2e-10	NHGRI	26293465				African|European|African American
Subcutaneous Fat	10916025	intron	ITPKB	3707	ITPKB	3707	1	226668188	6e-06	NHGRI	22589738				European
Platelet Function Tests	2045159	intergenic	LRRK1	79705	CHSY1	22856	15	101150902	1.0703700E-005	dbGaP	0	3416	375	Genome-Wide Association of Platelet Phenotypes	European
Platelet Function Tests	2085161	intergenic	LRRK1	79705	CHSY1	22856	15	101107824	2.1796000E-005	dbGaP	0	3306	375	Genome-Wide Association of Platelet Phenotypes	African American
Platelet Function Tests	12591851	intergenic	LRRK1	79705	CHSY1	22856	15	101107470	2.2268400E-005	dbGaP	0	3306	375	Genome-Wide Association of Platelet Phenotypes	African American
Cardiovascular Physiological Phenomena	8141815	intron	MAPK1	5594	MAPK1	5594	22	21837296	1.2150000E-005	dbGaP	0	3053	221	NHLBI Family Heart Study (FamHS)	European
Multiple Sclerosis	2283792	intron	MAPK1	5594	MAPK1	5594	22	21776836	5e-09	NHGRI	21833088				European
Paliperidone Palmitate	117325373	UTR-3	PIM3	415116	PIM3	415116	22	49963977	2e-06	NHGRI	27846195				European
Schizophrenia	117325373	UTR-3	PIM3	415116	PIM3	415116	22	49963977	2e-06	NHGRI	27846195				European
Lupus Erythematosus, Systemic	7526662	nearGene-5	PUM1	9698	PUM1	9698	1	31066204	1.86E-5	dbGaP	18204446	2867	202	OMRF SLEGEN GWAS Data from European-American Women with Lupus	European
Lupus Erythematosus, Systemic	7526662	nearGene-5	PUM1	9698	PUM1	9698	1	31066204	1.86E-5	dbGaP	18204446	2867	216	International Consortium on the Genetics of Systemic Lupus Erythematosus (SLEGEN)	European
Lupus Erythematosus, Systemic	10753242	intron	PUM1	9698	PUM1	9698	1	31021628	2.16E-5	dbGaP	18204446	2867	202	OMRF SLEGEN GWAS Data from European-American Women with Lupus	European
Lupus Erythematosus, Systemic	10753242	intron	PUM1	9698	PUM1	9698	1	31021628	2.16E-5	dbGaP	18204446	2867	216	International Consortium on the Genetics of Systemic Lupus Erythematosus (SLEGEN)	European
Lupus Erythematosus, Systemic	10753241	intron	PUM1	9698	PUM1	9698	1	31017767	2.2E-5	dbGaP	18204446	2867	202	OMRF SLEGEN GWAS Data from European-American Women with Lupus	European
Lupus Erythematosus, Systemic	10753241	intron	PUM1	9698	PUM1	9698	1	31017767	2.2E-5	dbGaP	18204446	2867	216	International Consortium on the Genetics of Systemic Lupus Erythematosus (SLEGEN)	European
Lupus Erythematosus, Systemic	7536851	intron	PUM1	9698	PUM1	9698	1	30998855	2.29E-5	dbGaP	18204446	2867	202	OMRF SLEGEN GWAS Data from European-American Women with Lupus	European
Lupus Erythematosus, Systemic	7536851	intron	PUM1	9698	PUM1	9698	1	30998855	2.29E-5	dbGaP	18204446	2867	216	International Consortium on the Genetics of Systemic Lupus Erythematosus (SLEGEN)	European
Immunoglobulin M	11078697	intron	SENP3	26168	SENP3	26168	17	7565912	4e-07	NHGRI	23118916				East Asian|Asian
Atrial Fibrillation	2106261	intron	ZFHX3	463	ZFHX3	463	16	73017721	3e-16	NHGRI	22544366				European
Atrial Fibrillation	2106261	intron	ZFHX3	463	ZFHX3	463	16	73017721	2e-15	NHGRI	19597492				NR
Atrial Fibrillation	7190256	intron	ZFHX3	463	ZFHX3	463	16	72963084	3e-11	NHGRI	27790247				European
Atrial Fibrillation	7193343	intron	ZFHX3	463	ZFHX3	463	16	72995261	1e-10	NHGRI	19597491				European
Atrial Fibrillation	7190256	intron	ZFHX3	463	ZFHX3	463	16	72963084	5e-10	NHGRI	27790247				European
Blood Pressure	7190256	intron	ZFHX3	463	ZFHX3	463	16	72963084	3e-11	NHGRI	27790247				European
Body Mass Index	7190256	intron	ZFHX3	463	ZFHX3	463	16	72963084	3e-11	NHGRI	27790247				European
Body Mass Index	1548374	intron	ZFHX3	463	ZFHX3	463	16	73025830	3.0320000E-005	dbGaP	0	3007	221	NHLBI Family Heart Study (FamHS)	European
Cardiovascular Diseases	10518048	intron	ZFHX3	463	ZFHX3	463	16	72946841	3.08229721345304E-11	dbGaP	17903304	1342	342	NHLBI Framingham SNP Health Association Resource (SHARe)	European
Cardiovascular Diseases	10518048	intron	ZFHX3	463	ZFHX3	463	16	72946841	1.7707092227539E-9	dbGaP	17903304	1344	342	NHLBI Framingham SNP Health Association Resource (SHARe)	European
Cardiovascular Diseases	10518048	intron	ZFHX3	463	ZFHX3	463	16	72946841	3.1686443324061E-9	dbGaP	17903304	1358	342	NHLBI Framingham SNP Health Association Resource (SHARe)	European
Cardiovascular Diseases	10518048	intron	ZFHX3	463	ZFHX3	463	16	72946841	2.39538039477632E-8	dbGaP	17903304	1362	342	NHLBI Framingham SNP Health Association Resource (SHARe)	European
Cardiovascular Diseases	10518048	intron	ZFHX3	463	ZFHX3	463	16	72946841	2.61163771674666E-8	dbGaP	17903304	1360	342	NHLBI Framingham SNP Health Association Resource (SHARe)	European
Cardiovascular Diseases	10518048	intron	ZFHX3	463	ZFHX3	463	16	72946841	2.3717326436264E-7	dbGaP	17903304	1364	342	NHLBI Framingham SNP Health Association Resource (SHARe)	European
Cholesterol	7190256	intron	ZFHX3	463	ZFHX3	463	16	72963084	3e-11	NHGRI	27790247				European
Cholesterol, HDL	7190256	intron	ZFHX3	463	ZFHX3	463	16	72963084	3e-11	NHGRI	27790247				European
Cholesterol, LDL	16971384	intron	ZFHX3	463	ZFHX3	463	16	72897186	5e-06	NHGRI	21347282				African|African American
Coronary Disease	7190256	intron	ZFHX3	463	ZFHX3	463	16	72963084	3e-11	NHGRI	27790247				European
Coronary Disease	7190256	intron	ZFHX3	463	ZFHX3	463	16	72963084	5e-10	NHGRI	27790247				European
Diabetes Mellitus	7190256	intron	ZFHX3	463	ZFHX3	463	16	72963084	3e-11	NHGRI	27790247				European
Diabetes Mellitus	7190256	intron	ZFHX3	463	ZFHX3	463	16	72963084	5e-10	NHGRI	27790247				European
Electrocardiography	7190256	intron	ZFHX3	463	ZFHX3	463	16	72963084	3e-11	NHGRI	27790247				European
Embolism	7193343	intron	ZFHX3	463	ZFHX3	463	16	72995261	2e-10	NHGRI	26708676				East Asian|Asian|African|European|Hispanic
Glucocorticoids	2229288	missense	ZFHX3	463	ZFHX3	463	16	72794405	1e-06	NHGRI	26265699				NR
Glucose	7190256	intron	ZFHX3	463	ZFHX3	463	16	72963084	3e-11	NHGRI	27790247				European
Heart Failure	7190256	intron	ZFHX3	463	ZFHX3	463	16	72963084	3e-11	NHGRI	27790247				European
Heart Failure	7190256	intron	ZFHX3	463	ZFHX3	463	16	72963084	5e-10	NHGRI	27790247				European
Hematocrit	7190256	intron	ZFHX3	463	ZFHX3	463	16	72963084	3e-11	NHGRI	27790247				European
Hypospadias	1858800	intron	ZFHX3	463	ZFHX3	463	16	72990377	1e-18	NHGRI	25108383				European
Mortality	7190256	intron	ZFHX3	463	ZFHX3	463	16	72963084	3e-11	NHGRI	27790247				European
Mortality	7190256	intron	ZFHX3	463	ZFHX3	463	16	72963084	5e-10	NHGRI	27790247				European
Mucocutaneous Lymph Node Syndrome	7199343	intron	ZFHX3	463	ZFHX3	463	16	72975125	2e-06	NHGRI	19132087				European
Neoplasms	7190256	intron	ZFHX3	463	ZFHX3	463	16	72963084	3e-11	NHGRI	27790247				European
Neoplasms	7190256	intron	ZFHX3	463	ZFHX3	463	16	72963084	5e-10	NHGRI	27790247				European
Obesity	1548374	intron	ZFHX3	463	ZFHX3	463	16	73025830	2.8880000E-005	dbGaP	0	3015	221	NHLBI Family Heart Study (FamHS)	European
Osteonecrosis	2229288	missense	ZFHX3	463	ZFHX3	463	16	72794405	1e-06	NHGRI	26265699				NR
Plaque, Atherosclerotic	7204751	intron	ZFHX3	463	ZFHX3	463	16	73045784	1.8810000E-005	dbGaP	21909108	3880	930	CHARGE (Cohorts for Heart and Aging Research in Genomic Epidemiology)	European
Platelet Function Tests	8060701	intron	ZFHX3	463	ZFHX3	463	16	73039390	8.0100000E-006	dbGaP	0	3132	375	Genome-Wide Association of Platelet Phenotypes	African American
Platelet Function Tests	12599119	intron	ZFHX3	463	ZFHX3	463	16	72899156	1.7762800E-005	dbGaP	0	3137	375	Genome-Wide Association of Platelet Phenotypes	African American
Platelet Function Tests	2157786	intron	ZFHX3	463	ZFHX3	463	16	72957387	2.0018300E-005	dbGaP	0	3180	375	Genome-Wide Association of Platelet Phenotypes	African American
Schizophrenia	16971465	intron	ZFHX3	463	ZFHX3	463	16	72983162	6e-06	NHGRI	26198764				Arab
Stroke	7190256	intron	ZFHX3	463	ZFHX3	463	16	72963084	3e-11	NHGRI	27790247				European
Stroke	7193343	intron	ZFHX3	463	ZFHX3	463	16	72995261	2e-10	NHGRI	26708676				East Asian|Asian|African|European|Hispanic
Stroke	7190256	intron	ZFHX3	463	ZFHX3	463	16	72963084	5e-10	NHGRI	27790247				European
Stroke	879324	intron	ZFHX3	463	ZFHX3	463	16	73034779	2e-08	NHGRI	23041239				European
Triglycerides	7190256	intron	ZFHX3	463	ZFHX3	463	16	72963084	3e-11	NHGRI	27790247				European
Vitamin B 6	6499594	intron	ZFHX3	463	ZFHX3	463	16	72883702	7.6570000E-005	dbGaP	0	3825	215	Genome-Wide Association Analysis of Biomarkers in the InCHIANTI and BLSA	European
Waist Circumference	1548374	intron	ZFHX3	463	ZFHX3	463	16	73025830	7.8720000E-006	dbGaP	0	3025	221	NHLBI Family Heart Study (FamHS)	European
Waist Circumference	4556810	intron	ZFHX3	463	ZFHX3	463	16	72999574	6.2680000E-005	dbGaP	0	3025	221	NHLBI Family Heart Study (FamHS)	European

## Sheet: Table S8. Meta-analysis
Table S8. Meta-analysis. CpG sites differentially methylated in relation to ischemic stroke. CpG id; Chr, chromosome location; genomic position; associated gene and observed mean β-values (standard deviation)
CpG	CHR	Position	Gene	cpg_feature	classification cpg	N	ZscorE	P-valuE	DirEction
cg25869317	15	101792241	CHSY1	Promoter_Associated	Island	793	8.966	3.064e-19	+++
cg04192862	10	28966472	BAMBI;BAMBI	Promoter_Associated	Island	793	8.886	6.324e-19	+++
cg07786668	16	73092391	ZFHX3	Unclassified	Island	793	8.781	1.626e-18	+++
cg16573386	1	1334508	CCNL2;CCNL2;LOC148413;CCNL2;CCNL2	Unclassified	Island	793	8.451	2.9e-17	+++
cg05029189	3	123168386	ADCY5		Island	793	8.291	1.118e-16	+++
cg09000178	16	67063319	CBFB;CBFB		Island	793	8.251	1.573e-16	+++
cg01733795	17	7465439	SENP3;SENP3		Island	793	8.175	2.957e-16	+++
cg13696351	9	140063617	LRRC26		Island	793	8.172	3.026e-16	+++
cg07806715	19	48018254	NAPA;NAPA	Promoter_Associated	Island	793	8.168	3.138e-16	+++
cg00614832	16	73092394	ZFHX3	Unclassified	Island	793	8.164	3.231e-16	+++
cg09915769	19	7660977	CAMSAP3	Unclassified	Island	793	8.131	4.259e-16	+++
cg22534627	12	65004466	RASSF3	Promoter_Associated	Island	793	8.111	5.036e-16	+++
cg02463426	19	16683387	SLC35E1	Promoter_Associated	Island	793	8.107	5.19e-16	+++
cg19539824	9	139010884	C9orf69	Promoter_Associated	Island	793	8.061	7.585e-16	+++
cg07691609	19	662740	RNF126		Island	793	8.029	9.844e-16	+++
cg08676905	10	6019609	IL15RA;IL15RA	Promoter_Associated	Island	793	7.979	1.472e-15	+++
cg08184047	17	79849980	ANAPC11;ANAPC11;ANAPC11;ANAPC11;ANAPC11;ANAPC11;ANAPC11;ANAPC11;THOC4	Promoter_Associated	Island	793	7.881	3.239e-15	+++
cg03536846	8	120886254	DEPDC6	Promoter_Associated	Island	793	7.823	5.167e-15	+++
cg23962478	22	50354086	PIM3	Promoter_Associated	Island	793	7.813	5.606e-15	+++
cg14810343	5	139028149	CXXC5		Island	793	7.773	7.635e-15	+++
cg19656070	17	3571978	TMEM93;TAX1BP3;TMEM93	Promoter_Associated	Island	793	7.75	9.21e-15	+++
cg06405765	16	30087414	PPP4C;PPP4C	Promoter_Associated	Island	793	7.749	9.28e-15	+++
cg20462855	6	126070385	HEY2		Island	793	7.729	1.084e-14	+++
cg23281075	1	31538727	PUM1;PUM1	Promoter_Associated	Island	793	7.698	1.378e-14	+++
cg06014792	17	7382760	ZBTB4;ZBTB4	Promoter_Associated	S_Shore	793	7.68	1.588e-14	+++
cg04482794	1	226925181	ITPKB		Island	793	7.648	2.049e-14	+++
cg12885832	12	111843885	SH2B3;SH2B3	Promoter_Associated	Island	793	7.626	2.42e-14	+++
cg10423910	5	127420075	SLC12A2;FLJ33630		Island	793	7.621	2.514e-14	+++
cg04759220	5	78532560	JMY		Island	793	7.614	2.658e-14	+++
cg05064002	19	17858612	FCHO1;FCHO1;FCHO1;FCHO1	Unclassified	Island	793	7.607	2.806e-14	+++
cg03784628	11	64059937	KCNK4	Unclassified_Cell_type_specific	Island	793	7.588	3.239e-14	+++
cg00061769	1	155658843	YY1AP1;DAP3;DAP3;YY1AP1	Promoter_Associated	Island	793	7.562	3.957e-14	+++
cg04355250	12	113796401	PLBD2;PLBD2;PLBD2;PLBD2	Promoter_Associated	Island	793	7.513	5.781e-14	+++
cg23681311	22	22221878	MAPK1;MAPK1;MAPK1;MAPK1	Promoter_Associated	Island	793	7.496	6.588e-14	+++
cg03273509	18	9913806	VAPA;VAPA	Promoter_Associated	Island	793	7.493	6.753e-14	+++
cg16887862	1	1243669	PUSL1;ACAP3	Unclassified	Island	793	7.49	6.872e-14	+++
cg00992659	1	17766225	RCC2;RCC2	Promoter_Associated	S_Shore	793	7.485	7.157e-14	+++
cg25142954	15	41245554	CHAC1;CHAC1	Promoter_Associated	Island	793	7.48	7.422e-14	+++
cg17116739	16	67063591	CBFB;CBFB		Island	793	7.476	7.668e-14	+++
cg01182555	14	62162064	HIF1A;HIF1A	Promoter_Associated	Island	793	7.467	8.177e-14	+++
cg01963056	8	144911482	PUF60;PUF60;PUF60;PUF60;PUF60	Promoter_Associated	Island	793	7.415	1.212e-13	+++
cg24578966	4	84457523	AGPAT9	Promoter_Associated_Cell_type_specific	Island	793	7.409	1.274e-13	+++
cg17491846	19	19431584	KIAA0892;SF4	Promoter_Associated	Island	793	7.402	1.344e-13	+++
cg27007358	7	21467723	SP4;SP4	Promoter_Associated	Island	793	7.4	1.366e-13	+++
cg04165030	5	175843293	CLTB;CLTB	Promoter_Associated	Island	793	7.391	1.46e-13	+++
cg23108125	5	176882586	PRR7	Promoter_Associated	Island	793	7.387	1.496e-13	+++
cg04910183	1	193090988	CDC73	Promoter_Associated	Island	625	7.375	1.637e-13	++?
cg07619799	4	185747409	ACSL1		Island	793	7.363	1.794e-13	+++
cg02067430	17	79679069	SLC25A10	Unclassified	Island	793	7.325	2.385e-13	+++
cg08497766	10	6019877	IL15RA;IL15RA;IL15RA	Promoter_Associated	Island	793	7.305	2.775e-13	+++
cg15504677	19	49521513	LHB	Promoter_Associated	Island	793	7.289	3.117e-13	+++
cg12160011	6	111804095	REV3L;REV3L	Promoter_Associated	Island	793	7.264	3.753e-13	+++
cg17492326	8	124780746	FAM91A1	Promoter_Associated	Island	793	7.238	4.56e-13	+++
cg15700006	1	2160297	SKI		Island	793	7.233	4.721e-13	+++
cg16229180	19	1103746	GPX4;GPX4;GPX4	Promoter_Associated	Island	793	7.233	4.726e-13	+++
cg03732936	1	224371029	DEGS1;DEGS1;DEGS1;DEGS1	Promoter_Associated	Island	793	7.228	4.907e-13	+++
cg06699484	5	132166328		Unclassified	Island	793	7.227	4.945e-13	+++
cg11365360	3	184279509	EPHB3	Unclassified	Island	793	7.226	4.98e-13	+++
cg05310613	6	139456890	HECA		Island	793	7.204	5.844e-13	+++
cg01025283	3	138327728	FAIM;FAIM;FAIM;FAIM;FAIM;FAIM;FAIM	Promoter_Associated	Island	793	7.194	6.284e-13	+++
cg14507132	15	57210852	TCF12;TCF12;LOC145783;TCF12;TCF12;TCF12;TCF12;TCF12;TCF12	Promoter_Associated	Island	793	7.191	6.413e-13	+++
cg20367329	17	17399941	RASD1		Island	793	7.184	6.783e-13	+++
cg07326074	16	2510388	C16orf59	Promoter_Associated	Island	793	7.183	6.812e-13	+++
cg10849092	15	40574697		Promoter_Associated_Cell_type_specific	Island	793	7.18	6.964e-13	+++
cg07836815	17	61778515	LIMD2		Island	793	7.178	7.097e-13	+++
cg20962543	1	85666741	SYDE2	Promoter_Associated	Island	793	7.172	7.386e-13	+++
cg20366603	17	7218821	GPS2	Promoter_Associated	Island	793	7.162	7.964e-13	+++
cg07331616	11	63933573	MACROD1;MACROD1	Promoter_Associated	Island	793	7.154	8.402e-13	+++
cg20012028	22	39151999	UNC84B	Promoter_Associated	Island	793	7.147	8.841e-13	+++
cg23758016	17	73521635	LLGL2;LLGL2;LLGL2	Unclassified	Island	625	7.141	9.24e-13	++?
cg15408407	19	1438438	RPS15	Promoter_Associated	Island	793	7.134	9.731e-13	+++
cg04627240	19	42746847	GSK3A	Promoter_Associated	Island	793	7.123	1.058e-12	+++
cg17895236	17	8924740	NTN1	Unclassified	Island	793	7.11	1.157e-12	+++
cg12928619	2	74648754	WDR54	Promoter_Associated	Island	793	7.101	1.235e-12	+++
cg05787952	16	734667	JMJD8	Promoter_Associated	Island	793	7.094	1.299e-12	+++
cg01854842	20	49547693	ADNP;ADNP	Promoter_Associated	N_Shore	793	7.092	1.323e-12	+++
cg21702497	16	22309096	POLR3E		Island	793	7.087	1.369e-12	+++
cg01470744	9	134406824	UCK1;UCK1	Promoter_Associated	Island	793	7.085	1.391e-12	+++
cg03231960	19	49139050	DBP	Promoter_Associated	Island	793	7.079	1.451e-12	+++
cg07032309	8	103668104	KLF10	Promoter_Associated	Island	793	7.076	1.483e-12	+++
cg18652923	2	109745344	SH3RF3;LOC100287216		Island	793	7.074	1.501e-12	+++
cg00799842	20	44563271	PCIF1	Promoter_Associated	Island	793	7.06	1.664e-12	+++
cg16869008	8	145550615	DGAT1	Promoter_Associated	Island	793	7.052	1.764e-12	+++
cg21338479	7	101459330	CUX1;CUX1	Promoter_Associated	Island	793	7.047	1.831e-12	+++
cg04280480	22	46547117	PPARA;PPARA		Island	793	7.044	1.862e-12	+++
cg25308231	11	120894785	TBCEL;TBCEL	Promoter_Associated	Island	793	7.044	1.87e-12	+++
cg06584619	20	3869523	PANK2;PANK2;PANK2;PANK2	Promoter_Associated	Island	793	7.034	2.011e-12	+++
cg22512377	22	42475683	C22orf32	Promoter_Associated	Island	793	7.022	2.19e-12	+++
cg19509894	19	8070923	ELAVL1	NonGene_Associated	OpenSea	793	7.009	2.401e-12	+++
cg11828669	14	64971476	ZBTB1;ZBTB25;ZBTB1;ZBTB1;ZBTB1		Island	793	7.003	2.512e-12	+++
cg16458021	21	43430507	ZNF295;ZNF295;ZNF295	Promoter_Associated	Island	793	6.995	2.651e-12	+++
cg13433446	9	128170534		Unclassified	Island	793	6.99	2.756e-12	+++
cg11429664	15	91260578	BLM;BLM	Promoter_Associated	Island	793	6.987	2.812e-12	+++
cg17626178	2	205410273	PARD3B;PARD3B;PARD3B	Unclassified_Cell_type_specific	Island	793	6.981	2.926e-12	+++
cg07061867	3	56716962	C3orf63	NonGene_Associated	Island	793	6.981	2.932e-12	+++
cg07526021	5	79950611	MSH3;DHFR;DHFR	Promoter_Associated	Island	793	6.973	3.105e-12	+++
cg11016194	1	42501599		Promoter_Associated	Island	793	6.964	3.309e-12	+++
cg09780955	10	97321190	SORBS1;SORBS1	Promoter_Associated	Island	793	6.958	3.46e-12	+++
cg02249648	12	1703181	FBXL14		Island	793	6.948	3.708e-12	+++
cg01888767	5	131832552		Promoter_Associated	Island	793	6.942	3.873e-12	+++
cg06793581	16	46865077	C16orf87	Promoter_Associated	Island	793	6.94	3.912e-12	+++
cg25498327	5	68389852	SLC30A5;SLC30A5;SLC30A5	Promoter_Associated	Island	793	6.937	4.012e-12	+++
cg05266843	8	95961618	TP53INP1;TP53INP1	Promoter_Associated	Island	793	6.921	4.496e-12	+++
cg10306866	5	107716890	FBXL17		Island	793	6.914	4.696e-12	+++
cg18766912	15	25683909	UBE3A;UBE3A		Island	793	6.911	4.819e-12	+++
cg23456692	3	5229596	EDEM1	Promoter_Associated	Island	793	6.906	4.989e-12	+++
cg14971744	17	3627058	ITGAE;GSG2	Promoter_Associated	Island	793	6.9	5.213e-12	+++
cg00179423	8	145653749	VPS28;VPS28	Promoter_Associated	Island	793	6.899	5.238e-12	+++
cg05039463	14	91282525	TTC7B	Unclassified_Cell_type_specific	Island	793	6.893	5.462e-12	+++
cg06703062	1	31191648	MATN1	Promoter_Associated	Island	793	6.882	5.908e-12	+++
cg22871529	13	49550815	FNDC3A	Promoter_Associated	Island	793	6.871	6.358e-12	+++
cg22835157	15	41218352			Island	793	6.861	6.845e-12	+++
cg16570019	20	61448188	COL9A3	Unclassified_Cell_type_specific	Island	793	6.855	7.147e-12	+++
cg00745962	18	5296141	ZFP161;ZFP161;ZFP161	Promoter_Associated	Island	793	6.839	7.99e-12	+++
cg01634153	1	39571505	MACF1	Unclassified	Island	793	6.836	8.117e-12	+++
cg00958578	16	103715	SNRNP25;POLR3K	Promoter_Associated	Island	793	6.826	8.722e-12	+++
cg18496317	20	62205614	PRIC285	Promoter_Associated	Island	793	6.814	9.498e-12	+++
cg09281539	20	20693126	RALGAPA2;RALGAPA2	Promoter_Associated	Island	793	6.798	1.062e-11	+++
cg05232802	7	156742224	NOM1	Promoter_Associated	N_Shore	793	6.782	1.184e-11	+++
cg09514055	1	43919573	HYI	Promoter_Associated	Island	793	6.77	1.287e-11	+++
cg27619163	17	7982806	ALOX12B	Unclassified	Island	793	6.754	1.437e-11	+++
cg13474619	12	131356588	RAN	Promoter_Associated	Island	793	6.752	1.462e-11	+++
cg12075970	12	122064387	ORAI1	Promoter_Associated	Island	793	6.749	1.488e-11	+++
cg02385710	11	64884962	ZNHIT2	Promoter_Associated	Island	793	6.741	1.573e-11	+++
cg02182114	7	139876578	LOC100134229;JHDM1D		Island	793	6.731	1.691e-11	+++
cg17222234	15	68871405	CORO2B	Unclassified	Island	793	6.721	1.808e-11	+++
cg26151531	22	19842652	GNB1L;C22orf29	Promoter_Associated	Island	793	6.715	1.885e-11	+++
cg09977800	17	80477464	FOXK2	Promoter_Associated	Island	793	6.712	1.919e-11	+++
cg19099833	1	201476290	CSRP1;CSRP1;CSRP1;CSRP1	Promoter_Associated	Island	793	6.711	1.934e-11	+++
cg10726394	6	157098467	ARID1B;ARID1B;ARID1B	Promoter_Associated	OpenSea	793	6.704	2.022e-11	+++
cg24180066	19	56632673	ZNF787	Promoter_Associated	Island	793	6.7	2.078e-11	+++
cg25611931	11	118978508	C2CD2L	Promoter_Associated	Island	793	6.699	2.104e-11	+++
cg26775914	19	47852455	DHX34	Promoter_Associated	Island	793	6.693	2.189e-11	+++
cg07831432	5	179125659	CANX;CANX	Promoter_Associated	Island	793	6.69	2.227e-11	+++
cg07086847	8	145550618	DGAT1	Promoter_Associated	Island	793	6.683	2.339e-11	+++
cg11287851	11	119187772	MCAM		Island	793	6.682	2.357e-11	+++
cg06026129	19	822355	LPPR3	Promoter_Associated_Cell_type_specific	Island	793	6.679	2.402e-11	+++
cg10314752	14	94640828	PPP4R4;PPP4R4		Island	793	6.678	2.419e-11	+++
cg08526825	16	2802229	SRRM2;LOC100128788		Island	793	6.675	2.465e-11	+++
cg19373170	3	53079105	SFMBT1;SFMBT1;SFMBT1;SFMBT1		Island	793	6.66	2.741e-11	+++
cg17944940	17	73285520	SLC25A19;SLC25A19;SLC25A19;SLC25A19;SLC25A19;SLC25A19	Promoter_Associated	Island	793	6.642	3.084e-11	+++
cg21273013	1	23670943	HNRNPR;HNRNPR;HNRNPR;HNRNPR	Promoter_Associated	Island	793	6.639	3.151e-11	+++
cg08521010	3	179370821	USP13		Island	793	6.634	3.277e-11	+++
cg22164238	1	110162488	AMPD2;AMPD2;AMPD2	Promoter_Associated	Island	793	6.632	3.304e-11	+++
cg23304339	19	37862045	ZNF527	Unclassified	Island	793	6.631	3.33e-11	+++
cg05970992	4	6785456	KIAA0232;KIAA0232	Promoter_Associated	S_Shore	793	6.62	3.598e-11	+++
cg20083107	8	12523148		Unclassified	Island	625	6.603	4.024e-11	++?
cg25614222	11	130184756	ZBTB44	Promoter_Associated	S_Shore	793	6.571	4.988e-11	+++
cg03448816	1	28052370	FAM76A;FAM76A;FAM76A;FAM76A;FAM76A	Promoter_Associated	Island	793	6.569	5.082e-11	+++
cg25974903	1	65211057	RAVER2		Island	793	6.565	5.217e-11	+++
cg08503002	3	183903768	ABCF3	Promoter_Associated	Island	793	6.564	5.229e-11	+++
cg16560453	3	101395512	ZBTB11;LOC100009676	Promoter_Associated	Island	793	6.562	5.303e-11	+++
cg01109287	10	65281299	REEP3;REEP3	Promoter_Associated	Island	793	6.561	5.341e-11	+++
cg06556397	1	42801023	FOXJ3	Promoter_Associated	Island	793	6.56	5.392e-11	+++
cg05964635	6	15662707	DTNBP1;DTNBP1;DTNBP1	Promoter_Associated	Island	793	6.549	5.781e-11	+++
cg23141825	1	226111974	PYCR2	Promoter_Associated	Island	793	6.548	5.839e-11	+++
cg16968115	1	27560829	WDTC1	Promoter_Associated	Island	793	6.529	6.612e-11	+++
cg11289281	16	4897921	GLYR1;UBN1;UBN1		Island	793	6.529	6.615e-11	+++
cg13629563	1	25256949	RUNX3;RUNX3	Promoter_Associated	Island	793	6.52	7.024e-11	+++
cg25072436	2	30454560	LBH;LBH	Promoter_Associated	Island	793	6.52	7.038e-11	+++
cg03960699	2	61697528	USP34		OpenSea	793	6.519	7.092e-11	+++
cg00874357	12	62997129	MIRLET7I;C12orf61;C12orf61	Promoter_Associated	Island	793	6.514	7.294e-11	+++
cg24526499	1	155100382	EFNA1;EFNA1;EFNA1;EFNA1	Unclassified_Cell_type_specific	Island	793	6.513	7.351e-11	+++
cg15048802	2	200820651	C2orf60;C2orf60;C2orf47	Promoter_Associated	Island	793	6.504	7.807e-11	+++
cg13865502	9	140196251	NRARP		Island	793	6.502	7.932e-11	+++
cg11053496	14	53019545	TXNDC16;TXNDC16;GPR137C	Promoter_Associated	Island	793	6.499	8.07e-11	+++
cg14955151	17	73874635	TRIM47;TRIM47		Island	793	6.493	8.429e-11	+++
cg23706268	13	51484060	RNASEH2B;RNASEH2B;RNASEH2B;RNASEH2B	Promoter_Associated	Island	793	6.49	8.574e-11	+++
cg13800586	2	242626324	DTYMK;DTYMK;DTYMK;DTYMK;DTYMK	Promoter_Associated	Island	793	6.484	8.937e-11	+++
cg04794505	9	128508709	PBX3;PBX3;PBX3		Island	793	6.469	9.87e-11	+++
cg04665180	9	132934972	FREQ		N_Shore	793	6.467	9.982e-11	+++
cg19240052	22	42475693	C22orf32	Promoter_Associated	Island	625	6.466	1.007e-10	++?
cg21957156	1	26372718	SLC30A2;SLC30A2	Unclassified_Cell_type_specific	Island	793	6.443	1.17e-10	+++
cg07597763	11	59382877	OSBP	Promoter_Associated	Island	793	6.44	1.198e-10	+++
cg09643587	3	107809710	CD47;CD47;CD47		Island	793	6.433	1.25e-10	+++
cg17629793	19	42580205	ZNF574	Promoter_Associated	Island	793	6.427	1.303e-10	+++
cg02484850	22	36783942	MYH9;MYH9	Promoter_Associated	Island	625	6.419	1.369e-10	++?
cg13468174	19	58919984	ZNF584	Promoter_Associated	Island	793	6.413	1.427e-10	+++
cg14102272	2	201729414	CLK1;CLK1;CLK1;CLK1;CLK1	Promoter_Associated	Island	793	6.41	1.456e-10	+++
cg00010046	16	88729480	MGC23284;MGC23284;MVD	Promoter_Associated	Island	793	6.408	1.473e-10	+++
cg17255450	4	5710372	EVC2;EVC2		Island	793	6.398	1.574e-10	+++
cg18839746	20	61448150	COL9A3	Unclassified_Cell_type_specific	Island	793	6.395	1.609e-10	+++
cg10583632	17	16557199	ZNF624	Promoter_Associated	Island	793	6.387	1.687e-10	+++
cg09969011	16	29874179	LOC440356;LOC440356;CDIPT;CDIPT	Promoter_Associated	Island	793	6.377	1.807e-10	+++
cg01188574	19	925914	ARID3A	Promoter_Associated	Island	793	6.376	1.817e-10	+++
cg08134053	2	24232856	MFSD2B	Unclassified_Cell_type_specific	Island	793	6.373	1.855e-10	+++
cg13841901	1	45805975	MUTYH;TOE1;MUTYH;MUTYH;MUTYH;MUTYH;MUTYH;MUTYH;MUTYH;MUTYH	Promoter_Associated	Island	793	6.372	1.862e-10	+++
cg24561572	17	43298813	FMNL1		Island	793	6.368	1.92e-10	+++
cg08364767	15	40212176	GPR176		Island	793	6.366	1.939e-10	+++
cg06704539	7	102105256	ALKBH4;LRWD1	Promoter_Associated	Island	625	6.361	2.006e-10	++?
cg24097153	12	122231765	RHOF	Promoter_Associated	Island	793	6.359	2.028e-10	+++
cg23943801	12	72149029	RAB21	Unclassified	Island	793	6.358	2.044e-10	+++
cg16691477	11	64889790	FAU;MRPL49;MRPL49	Promoter_Associated	Island	793	6.355	2.082e-10	+++
cg26278858	15	40401256	BMF	Promoter_Associated	Island	793	6.344	2.241e-10	+++
cg11299854	5	132083184	CCNI2;CCNI2	Promoter_Associated	Island	793	6.337	2.343e-10	+++
cg00473112	11	507177	RNH1;RNH1;RNH1;RNH1;RNH1;RNH1;RNH1;RNH1;RNH1;RNH1;RNH1;RNH1	Promoter_Associated	Island	793	6.336	2.356e-10	+++
cg10671907	6	109703593	CD164;CD164;CD164;CD164;CD164;CD164;CD164;CD164;CD164;CD164	Promoter_Associated	Island	793	6.336	2.363e-10	+++
cg22035166	7	42951793	C7orf25;C7orf25	Promoter_Associated	Island	625	6.325	2.529e-10	++?
cg00156744	5	171615663	STK10	Promoter_Associated	Island	793	6.312	2.759e-10	+++
cg25858682	3	48481793	CCDC72;CCDC51	Promoter_Associated	Island	793	6.309	2.803e-10	+++
cg08174462	12	56709715	CNPY2;CNPY2	Promoter_Associated	Island	793	6.305	2.874e-10	+++
cg18030218	19	38865513	PSMD8	Promoter_Associated	Island	793	6.301	2.96e-10	+++
cg26212924	8	145150439	CYC1	Promoter_Associated	Island	793	6.3	2.983e-10	+++
cg12815987	14	91719608	GPR68	Promoter_Associated	Island	793	6.29	3.182e-10	+++
cg24354901	1	202777590	KDM5B		Island	625	6.287	3.245e-10	++?
cg15266508	20	61447742	COL9A3	Unclassified_Cell_type_specific	Island	793	6.282	3.342e-10	++-
cg04315264	6	35436252	RPL10A	Promoter_Associated	Island	625	6.262	3.79e-10	++?
cg18102469	3	128902681	CNBP;CNBP;CNBP;CNBP;CNBP;CNBP;CNBP;CNBP;CNBP;CNBP;CNBP;CNBP	Unclassified	Island	793	6.262	3.805e-10	+++
cg16236394	2	113033084	ZC3H6	Promoter_Associated	Island	793	6.261	3.831e-10	+++
cg14816748	17	74349897	PRPSAP1;PRPSAP1	Promoter_Associated	Island	793	6.256	3.962e-10	+++
cg26376809	3	179370824	USP13		Island	793	6.249	4.137e-10	+++
cg03371770	2	96932024	CIAO1;CIAO1;TMEM127	Promoter_Associated	Island	793	6.242	4.333e-10	+++
cg24109980	10	50818707	SLC18A3;SLC18A3;CHAT	Unclassified_Cell_type_specific	Island	793	6.236	4.503e-10	+++
cg12679910	17	73900713	MRPL38	Promoter_Associated	Island	793	6.234	4.558e-10	+++
cg12425673	12	862975	WNK1		Island	793	6.232	4.618e-10	+++
cg08739576	7	44144360	AEBP1	Unclassified	OpenSea	793	6.229	4.685e-10	+++
cg26599209	5	156692972	CYFIP2;CYFIP2	Promoter_Associated	Island	793	6.219	4.989e-10	+++
cg13294594	19	12949443	MAST1	Unclassified	Island	793	6.212	5.226e-10	+++
cg21631583	3	15247517	DVWA;CAPN7	Promoter_Associated	Island	793	6.211	5.263e-10	+++
cg09353063	3	8811092	OXTR;OXTR	Unclassified	Island	793	6.211	5.267e-10	+++
cg00170056	19	37861986	ZNF527	Unclassified	Island	793	6.21	5.285e-10	+++
cg14397361	9	140149997	COBRA1	Promoter_Associated	Island	625	6.209	5.329e-10	++?
cg13716829	9	140196785	NRARP	Promoter_Associated	Island	793	6.208	5.368e-10	+++
cg07565236	16	88869998	CDT1	Promoter_Associated	Island	625	6.207	5.393e-10	++?
cg05914439	17	34958381	MRM1	Promoter_Associated	Island	793	6.206	5.428e-10	+++
cg08764167	10	103113933	BTRC;BTRC;BTRC;BTRC	Promoter_Associated	Island	793	6.206	5.449e-10	+++
cg08667148	6	138188411	TNFAIP3	Promoter_Associated	Island	793	6.2	5.649e-10	+++
cg23702568	10	88281502	WAPAL;WAPAL	Promoter_Associated	Island	625	6.198	5.736e-10	++?
cg25910466	20	21283998	XRN2;XRN2	Promoter_Associated	Island	793	6.196	5.785e-10	+++
cg24331354	3	14444067	SLC6A6;SLC6A6;SLC6A6	Promoter_Associated	Island	793	6.178	6.486e-10	+++
cg15959756	2	32289083	SPAST;SPAST	Promoter_Associated	Island	793	6.177	6.543e-10	+++
cg04258457	17	62207789	ERN1		Island	793	6.168	6.928e-10	+++
cg07323055	20	3140559	FASTKD5;UBOX5;UBOX5	Promoter_Associated	Island	625	6.165	7.068e-10	++?
cg02779230	1	28879417	TRNAU1AP;TRNAU1AP	Promoter_Associated	Island	793	6.164	7.085e-10	+++
cg23783768	10	45454944	RASSF4	Promoter_Associated	Island	625	6.158	7.363e-10	++?
cg04004437	18	21242479	ANKRD29	Unclassified	Island	793	6.151	7.705e-10	+++
cg11858249	21	45079790	HSF2BP;RRP1B	Promoter_Associated_Cell_type_specific	Island	793	6.146	7.961e-10	+++
cg05105845	14	55369781	GCH1;GCH1;GCH1;GCH1	Promoter_Associated	Island	793	6.143	8.076e-10	+++
cg06897927	10	124895500	HMX3	Unclassified	Island	793	6.142	8.172e-10	+++
cg01403246	8	144512192	MAFA		Island	793	6.131	8.746e-10	+++
cg10122932	7	99698990	MCM7;MCM7;MCM7;AP4M1		Island	793	6.13	8.802e-10	+++
cg14157244	2	170655474	SSB;SSB	Promoter_Associated	Island	793	6.129	8.869e-10	+++
cg03361810	8	42010162	AP3M2;AP3M2	Promoter_Associated	Island	793	6.121	9.28e-10	+++
cg18167715	1	228270190	ARF1;ARF1;ARF1;ARF1	Unclassified	Island	793	6.118	9.479e-10	+++
cg23693683	3	46924113	PTH1R	Unclassified_Cell_type_specific	Island	793	6.109	1.003e-09	+++
cg11575912	19	5828299	NRTN		Island	793	6.1	1.063e-09	+++
cg19128498	4	15656874	FBXL5;FBXL5;FBXL5	Promoter_Associated	Island	793	6.099	1.07e-09	+++
cg14488957	1	1244644	ACAP3;PUSL1		Island	793	6.098	1.072e-09	+++
cg17368874	8	145743346	RECQL4;LRRC14	Promoter_Associated	Island	793	6.096	1.088e-09	+++
cg03834947	15	65321822	MTFMT	Promoter_Associated	Island	793	6.093	1.106e-09	+++
cg00294419	3	23244681	UBE2E2	Promoter_Associated	Island	793	6.081	1.196e-09	+++
cg12585429	16	49889252		Unclassified_Cell_type_specific	Island	793	6.077	1.221e-09	+++
cg07123227	8	30891112	WRN;PURG;PURG;PURG;WRN	Promoter_Associated	OpenSea	793	6.075	1.237e-09	+++
cg06933752	11	64889788	FAU;MRPL49;MRPL49	Promoter_Associated	Island	793	6.071	1.268e-09	+++
cg10462093	12	125348448	SCARB1;SCARB1;SCARB1;SCARB1	Promoter_Associated	Island	793	6.071	1.27e-09	+++
cg12133425	1	247494926	ZNF496;ZNF496		Island	793	6.064	1.329e-09	+++
cg15897774	5	7869176	MTRR;MTRR;FASTKD3	Promoter_Associated	Island	793	6.061	1.351e-09	+++
cg10041390	10	89623018	PTEN;KILLIN;KILLIN	Promoter_Associated	Island	793	6.056	1.394e-09	+++
cg03528784	6	74363598	SLC17A5		Island	793	6.037	1.571e-09	+++
cg11199399	2	33172442	LTBP1	Promoter_Associated	Island	793	6.037	1.575e-09	+++
cg16246698	12	133263907	PXMP2;POLE;POLE	Promoter_Associated	Island	793	6.033	1.608e-09	+++
cg12219045	22	44894262	LDOC1L	Promoter_Associated	S_Shore	625	6.031	1.633e-09	++?
cg02603366	20	60962040	RPS21	Unclassified	Island	793	6.018	1.767e-09	+++
cg02838932	18	12991623	CEP192	Promoter_Associated	Island	793	6.018	1.767e-09	+++
cg17630771	11	101981004	YAP1;YAP1		Island	793	6.008	1.881e-09	+++
cg00380464	6	144164650	LTV1	Promoter_Associated	Island	793	6.003	1.933e-09	+++
cg11656992	17	79818741	P4HB	Promoter_Associated	Island	793	6.003	1.938e-09	+++
cg07987587	22	42486991	NDUFA6	Promoter_Associated	Island	793	6	1.978e-09	+++
cg02564536	10	123687158	ATE1;ATE1		Island	793	5.994	2.042e-09	+++
cg05256242	12	12876945			Island	793	5.994	2.049e-09	+++
cg08965276	16	1030586	SOX8		Island	625	5.975	2.302e-09	++?
cg02567756	3	137906401	ARMC8;ARMC8;ARMC8;ARMC8;ARMC8;ARMC8	Promoter_Associated	Island	625	5.972	2.34e-09	++?
cg08252533	2	238875575	UBE2F	Promoter_Associated	Island	793	5.971	2.364e-09	+++
cg04077199	22	24989175	GGT1;C22orf36	Unclassified	Island	793	5.97	2.371e-09	+++
cg00208412	10	99609481	GOLGA7B		Island	793	5.969	2.39e-09	+++
cg06618322	15	85923867	AKAP13;AKAP13	Promoter_Associated	Island	625	5.968	2.399e-09	++?
cg18753480	1	110026701	ATXN7L2	Promoter_Associated	Island	793	5.952	2.646e-09	+++
cg00683158	19	7660969	KIAA1543;KIAA1543	Unclassified	Island	793	5.948	2.722e-09	+++
cg24256946	19	796991	PTBP1;PTBP1;PTBP1;PTBP1	Promoter_Associated	Island	793	5.942	2.816e-09	+++
cg05563388	1	3371107	ARHGEF16	Unclassified	Island	793	5.932	2.986e-09	+++
cg02753354	19	1074727	HMHA1	Promoter_Associated	Island	793	5.926	3.097e-09	+++
cg20011051	10	105881722	C10orf78;C10orf78	Promoter_Associated	Island	625	5.926	3.097e-09	++?
cg17332338	2	38763354		Promoter_Associated	Island	793	5.925	3.128e-09	+++
cg23011817	6	33422290	ZBTB9	Promoter_Associated	Island	793	5.902	3.582e-09	+++
cg09717545	19	917707	KISS1R	Unclassified	Island	793	5.902	3.597e-09	+++
cg00134843	17	76374495	PGS1	Promoter_Associated_Cell_type_specific	Island	793	5.896	3.73e-09	+++
cg06364629	2	27592939	EIF2B4;SNX17;EIF2B4;EIF2B4	Promoter_Associated	Island	793	5.894	3.762e-09	+++
cg16591304	10	115439377	CASP7;CASP7;CASP7;CASP7	Promoter_Associated_Cell_type_specific	Island	793	5.884	4.014e-09	+++
cg01016660	19	7660925	KIAA1543;KIAA1543	Unclassified	Island	793	5.883	4.026e-09	+++
cg21845957	14	103988428	CKB		Island	793	5.882	4.059e-09	+++
cg18565702	13	113241891	TUBGCP3	Promoter_Associated_Cell_type_specific	Island	793	5.87	4.369e-09	+++
cg23267944	2	232329239	NCL	Promoter_Associated	Island	793	5.861	4.592e-09	+++
cg09150006	6	158652830			Island	793	5.861	4.614e-09	+++
cg24769167	19	1205715	STK11	Promoter_Associated	Island	625	5.858	4.693e-09	++?
cg04600406	19	1605414	UQCR;UQCR	Promoter_Associated	Island	793	5.855	4.765e-09	+++
cg15736296	11	57335454	UBE2L6;UBE2L6	Promoter_Associated	Island	793	5.855	4.765e-09	+++
cg24130926	2	128643992		Promoter_Associated_Cell_type_specific	Island	793	5.852	4.862e-09	+++
cg01332181	19	47290716	SLC1A5;SLC1A5	Promoter_Associated	Island	625	5.848	4.967e-09	++?
cg16098780	10	81107244	PPIF;PPIF	Promoter_Associated	Island	793	5.837	5.306e-09	+++
cg20632873	1	155948126	ARHGEF2;ARHGEF2;ARHGEF2	Promoter_Associated	Island	793	5.834	5.408e-09	+++
cg16512867	3	136581189	NCK1	Promoter_Associated	Island	793	5.828	5.623e-09	+++
cg19949929	17	2304007	MNT;MNT	Promoter_Associated	Island	793	5.815	6.047e-09	+++
cg24079591	14	103851511	MARK3;MARK3;MARK3;MARK3;MARK3	Promoter_Associated	Island	793	5.815	6.077e-09	+++
cg26538931	16	2073293		Unclassified	N_Shelf	793	5.809	6.274e-09	+++
cg26462404	19	2270807	OAZ1	Promoter_Associated	Island	793	5.806	6.416e-09	+++
cg08427928	7	32997111	FKBP9;FKBP9	Unclassified_Cell_type_specific	Island	793	5.797	6.768e-09	+++
cg18774318	19	45004584	ZNF180	Promoter_Associated	Island	793	5.772	7.856e-09	+++
cg02089380	2	158732891	ACVR1;ACVR1	Promoter_Associated	OpenSea	625	5.769	7.976e-09	++?
cg00533923	6	116892543	RWDD1;RWDD1;RWDD1	Promoter_Associated	Island	793	5.757	8.545e-09	+++
cg10295360	17	73874699	TRIM47		Island	793	5.741	9.439e-09	+++
cg14041100	8	61591939	CHD7	Promoter_Associated	Island	625	5.74	9.444e-09	++?
cg13846507	9	130679184	ST6GALNAC4;ST6GALNAC4;ST6GALNAC4;ST6GALNAC4	Promoter_Associated	Island	793	5.732	9.927e-09	++-
cg21961583	2	170684455	UBR3		Island	793	5.73	1.005e-08	+-+
cg07813961	3	48956311	C3orf71;ARIH2;ARIH2	Promoter_Associated	Island	793	5.723	1.046e-08	+++
cg16979622	17	79196755	AZI1;AZI1	Promoter_Associated	Island	793	5.717	1.083e-08	+++
cg26563141	2	88124876	RGPD2;RGPD1		N_Shore	793	-5.708	1.141e-08	---
cg03697316	22	21336741	LZTR1	Promoter_Associated	Island	793	5.707	1.152e-08	+++
cg18153322	1	43534145		Unclassified	Island	793	5.699	1.207e-08	+++
cg01269670	7	149411377	KRBA1		Island	793	5.693	1.249e-08	+++
cg10250355	22	43045158	CYB5R3	Promoter_Associated	Island	793	5.69	1.27e-08	+++
cg21442773	1	236029828	LYST	Promoter_Associated	Island	625	5.689	1.277e-08	++?
cg16341592	3	112931182	BOC		Island	625	5.687	1.292e-08	++?
cg08134342	12	122239035	LOC338799	Promoter_Associated	Island	793	5.683	1.324e-08	+++
cg20863756	12	6809797	C12orf53;C12orf53	Unclassified	Island	793	5.681	1.343e-08	+++
cg26336164	19	4791680	FEM1A	Promoter_Associated	Island	793	5.671	1.416e-08	+++
cg22594055	5	131832675		Promoter_Associated	Island	793	5.668	1.445e-08	+++
cg20577878	16	66914781	PDP2	Promoter_Associated	Island	793	5.657	1.543e-08	+++
cg06915334	8	20161343		Unclassified_Cell_type_specific	Island	793	5.653	1.581e-08	+++
cg01493617	17	79650915	HGS;ARL16;ARL16	Promoter_Associated	Island	625	5.649	1.61e-08	++?
cg16201674	13	95364586	SOX21		Island	793	5.647	1.629e-08	+++
cg25487903	19	10828950	DNM2;DNM2;DNM2;MIR638;DNM2	Promoter_Associated	Island	793	5.642	1.677e-08	+++
cg25962774	5	176831364	F12	Promoter_Associated	Island	793	5.641	1.692e-08	+++
cg14616479	3	155588124	GMPS	Promoter_Associated	Island	793	5.638	1.718e-08	+++
cg08201152	19	1875879		Promoter_Associated	Island	793	5.633	1.771e-08	+++
cg19158176	1	1510364	SSU72	Promoter_Associated	Island	793	5.614	1.981e-08	+++
cg02096396	2	26395556	FAM59B		Island	793	5.582	2.374e-08	+++
cg07314414	2	128784923	SAP130;SAP130	Promoter_Associated	Island	793	5.578	2.436e-08	+++
cg19375676	1	244615173	ADSS;ADSS	Promoter_Associated	Island	793	5.573	2.499e-08	+++
cg10632229	1	226250431	H3F3A;LOC440926;H3F3A	Promoter_Associated	Island	793	5.555	2.77e-08	+++
cg25094927	22	41682102	RANGAP1;RANGAP1	Promoter_Associated	Island	793	5.554	2.787e-08	+++
cg22118131	15	78369834	TBC1D2B;TBC1D2B	Promoter_Associated	Island	793	5.543	2.975e-08	+++
cg08806699	1	10057970	RBP7	Unclassified_Cell_type_specific	Island	793	5.536	3.103e-08	+++
cg19410789	1	226249811	LOC440926;H3F3A	Promoter_Associated	Island	793	5.526	3.271e-08	+++
cg16044674	6	42981944	MEA1;KLHDC3	Promoter_Associated	Island	793	5.525	3.299e-08	+++
cg04077069	7	151217159	RHEB	Unclassified	Island	793	5.52	3.39e-08	+++
cg11817978	15	75494295	C15orf39;C15orf39	Promoter_Associated	Island	793	5.52	3.399e-08	+++
cg11744351	13	30424153	UBL3;UBL3		Island	793	5.518	3.429e-08	+++
cg25139493	1	39957400	BMP8A;BMP8A	Unclassified	Island	625	5.511	3.562e-08	++?
cg17267676	19	1194783		Unclassified	Island	793	5.489	4.034e-08	+++
cg02902761	17	38219410	THRA;THRA		Island	793	5.485	4.127e-08	+++
cg16576049	14	78266708	ADCK1;ADCK1	Promoter_Associated	Island	793	5.479	4.279e-08	+++
cg00142624	12	117627897	FBXO21;FBXO21	Promoter_Associated	Island	793	5.472	4.449e-08	+++
cg06011334	6	73973128	KHDC1	Promoter_Associated_Cell_type_specific	S_Shore	793	5.464	4.668e-08	+++
cg17987601	16	30389834	SEPT1	Promoter_Associated	Island	793	5.459	4.776e-08	+++
cg17103705	17	26972054	KIAA0100	Promoter_Associated	Island	793	5.444	5.2e-08	+++
cg10724442	19	40971809	SPTBN4;BLVRB	Promoter_Associated	Island	625	5.434	5.523e-08	++?
cg01575096	2	238969261	SCLY	Promoter_Associated	Island	625	5.433	5.546e-08	++?
cg13919607	16	3451181	ZNF174;ZNF174;ZNF434	Promoter_Associated	Island	793	5.422	5.908e-08	+++
cg07181376	16	58035192	C16orf57;ZNF319	Promoter_Associated	Island	793	5.418	6.022e-08	+++
cg23239039	4	4389115	D4S234E;D4S234E		Island	793	5.414	6.154e-08	+++
cg22376704	19	4760016		Unclassified	Island	793	5.407	6.402e-08	+++
cg19185384	13	45914939	LOC100190939;TPT1	Promoter_Associated	Island	793	5.392	6.959e-08	+++
cg24304618	18	71959402	CYB5A;CYB5A	Promoter_Associated	Island	793	5.387	7.167e-08	+++
cg00476037	2	70781307	TGFA;TGFA	Promoter_Associated	Island	793	5.378	7.519e-08	+++
cg03092918	10	126107592	OAT	Promoter_Associated	Island	793	5.377	7.577e-08	+++
cg10789151	20	33735143	EDEM2;EDEM2;EDEM2;EDEM2;EDEM2	Promoter_Associated	Island	793	5.375	7.672e-08	+++
cg10517474	16	31470676	ARMC5;ARMC5;ARMC5;ARMC5	Promoter_Associated	Island	793	5.373	7.765e-08	+++
cg26873439	20	49126821	PTPN1	Unclassified	Island	793	5.353	8.666e-08	+++
cg07857181	6	43543548	POLH;XPO5	Promoter_Associated	Island	793	5.35	8.802e-08	+++
cg08272151	5	150036071	SYNPO	Promoter_Associated	Island	793	5.344	9.077e-08	+++
cg02524531	22	46041485		Unclassified	Island	793	5.338	9.42e-08	+++
cg27383975	19	17356182	NR2F6		Island	793	5.336	9.486e-08	+++
cg06710900	3	13008958	IQSEC1;IQSEC1;IQSEC1	Promoter_Associated	Island	793	5.335	9.571e-08	+++
cg25703784	6	33255181	WDR46;WDR46		N_Shore	793	-5.328	9.91e-08	---
cg11474864	18	60263588			Island	793	5.327	9.982e-08	+++
cg14826516	22	50639351	SELO	Promoter_Associated	Island	793	5.316	1.062e-07	+++
cg22804935	4	926322	TMEM175;TMEM175;GAK	Promoter_Associated	Island	793	5.316	1.062e-07	+++
cg05032384	19	1138811	SBNO2		N_Shelf	625	-5.314	1.072e-07	--?
cg14153722	1	206858799	MAPKAPK2;MAPKAPK2	Promoter_Associated	Island	793	5.303	1.14e-07	+++
cg01366246	3	193852768	HES1	Unclassified	N_Shore	793	5.294	1.198e-07	+++
cg26325335	3	50402333	CACNA2D2;CACNA2D2	Promoter_Associated	Island	793	5.292	1.212e-07	+++
cg08241117	22	24199628	SLC2A11;SLC2A11;SLC2A11	Promoter_Associated	Island	793	5.289	1.228e-07	+++
cg25781121	3	48282641	ZNF589;ZNF589	Promoter_Associated	Island	793	5.272	1.347e-07	+++
cg00359325	3	49377419	USP4;USP4	Promoter_Associated	Island	625	5.271	1.358e-07	++?
cg04357830	21	36261693	RUNX1;RUNX1;RUNX1		Island	793	5.257	1.466e-07	+++
cg06467910	11	33037542	DEPDC7;DEPDC7	Promoter_Associated	Island	793	5.252	1.505e-07	+++
cg06982805	11	13690105	FAR1	Promoter_Associated	Island	793	5.251	1.513e-07	+++
cg13655563	17	1132368			Island	793	5.239	1.618e-07	+++
cg00591980	6	150071069	PCMT1	Promoter_Associated	Island	793	5.236	1.639e-07	+++
cg07789552	1	36851195	STK40	Promoter_Associated	Island	793	5.234	1.659e-07	+++
cg20385110	11	32605283	EIF3M	Promoter_Associated	Island	793	5.217	1.823e-07	+++
cg05315670	11	64037304	BAD;BAD	Promoter_Associated	Island	793	5.216	1.825e-07	+++
cg11891330	4	2010714	WHSC2	Promoter_Associated	Island	793	5.197	2.022e-07	+++
cg16329901	2	220094343	ATG9A;ANKZF1;ANKZF1;ATG9A;ATG9A;ATG9A	Promoter_Associated	Island	793	5.155	2.54e-07	+++
cg10488476	17	48133676	ITGA3;ITGA3;ITGA3;ITGA3	Unclassified	Island	793	5.143	2.709e-07	+++
cg25183890	8	94929275	PDP1;PDP1;PDP1;PDP1;PDP1;PDP1;PDP1;PDP1		Island	625	5.137	2.789e-07	++?
cg15420687	5	159546321	PWWP2A;PWWP2A	Promoter_Associated	Island	625	5.128	2.925e-07	++?
cg03965340	16	2826984	TCEB2;TCEB2		Island	625	5.118	3.083e-07	++?
cg26224725	7	74489898	WBSCR16	Promoter_Associated	Island	625	5.118	3.091e-07	++?
cg26996201	11	77122864	PAK1;PAK1	Promoter_Associated	Island	793	5.106	3.29e-07	+++
cg04564646	1	113217655	MOV10;MOV10		Island	793	5.105	3.302e-07	+++
cg22023046	1	45241572	SNORD46;SNORD55;RPS8	Promoter_Associated	Island	793	5.099	3.415e-07	+++
cg09122913	5	175875427	FAF2	Promoter_Associated	Island	793	5.076	3.863e-07	+++
cg05815411	17	61819127	STRADA;STRADA;STRADA;STRADA;STRADA;STRADA;STRADA;STRADA;STRADA;STRADA;STRADA;STRADA	Promoter_Associated	Island	793	5.067	4.037e-07	+++
cg00803088	10	43600706	RET;RET	Unclassified	Island	793	5.04	4.661e-07	+++
cg20152841	19	2073190	MOBKL2A		N_Shelf	793	-5.016	5.274e-07	--+
cg02867162	16	1020843	LMF1	Promoter_Associated	Island	793	5.008	5.511e-07	+++
cg26705583	5	65017946	SGTB;NLN	Promoter_Associated	Island	625	4.998	5.793e-07	++?
cg07232033	2	236403031	AGAP1;AGAP1;AGAP1;AGAP1		Island	793	4.967	6.785e-07	+-+
cg26163374	17	71188695	COG1		Island	793	4.966	6.827e-07	+++
cg23343073	11	65360449	KCNK7;KCNK7;KCNK7;KCNK7		S_Shore	793	-4.956	7.19e-07	---
cg16117472	20	45338396	SLC2A10	Unclassified_Cell_type_specific	Island	793	4.94	7.805e-07	+++
cg01446164	11	2421746		Promoter_Associated	Island	793	4.938	7.891e-07	+++
cg26050838	7	142985210	CASP2;CASP2	NonGene_Associated	Island	793	4.925	8.446e-07	+++
cg05187833	6	17706939	NUP153	Promoter_Associated	Island	793	4.922	8.547e-07	+++
cg18429793	10	127408055	C10orf137	Unclassified	Island	793	4.917	8.806e-07	++-
cg07899956	17	74261249	FAM100B	Promoter_Associated	Island	793	4.898	9.665e-07	+++
cg01362605	22	46374836		Promoter_Associated_Cell_type_specific	Island	625	4.89	1.01e-06	++?
cg08318582	11	109920663			OpenSea	793	-4.867	1.132e-06	--+
cg03745431	1	226736713	C1orf95		Island	793	4.858	1.185e-06	+++
cg05319880	12	100536419	UHRF1BP1L;UHRF1BP1L;UHRF1BP1L;UHRF1BP1L	Promoter_Associated	Island	625	4.841	1.289e-06	++?
cg21184629	9	38621834	C9orf122;ANKRD18A	Promoter_Associated	Island	625	4.839	1.302e-06	++?
cg22663117	17	79670454	MRPL12;MRPL12	Promoter_Associated	Island	625	4.836	1.322e-06	++?
cg00590670	2	217559207	IGFBP5	Unclassified_Cell_type_specific	Island	793	4.836	1.327e-06	+++
cg03638940	12	58149384	MARCH9	Promoter_Associated	Island	793	4.832	1.352e-06	+++
cg05198094	17	78075597	GAA;GAA;GAA;GAA	Promoter_Associated	Island	569	4.806	1.539e-06	+?+
cg25236971	4	17783059	FAM184B;FAM184B		Island	793	4.764	1.893e-06	+++
cg16024933	3	176915599	TBL1XR1	Promoter_Associated	Island	793	4.74	2.136e-06	+-+
cg27086020	5	148206096	ADRB2	Promoter_Associated	Island	793	4.714	2.426e-06	+++
cg13559099	11	62554740	TMEM179B;TAF6L	Promoter_Associated	Island	793	4.706	2.527e-06	+-+
cg15502903	22	17566297	IL17RA		Island	793	4.7	2.602e-06	+++
cg00028918	5	159200479		Unclassified	Island	793	4.673	2.97e-06	+++
cg01905589	1	26856408	RPS6KA1;RPS6KA1	Promoter_Associated	Island	793	4.671	3.003e-06	+-+
cg22078638	1	207495363	CD55;CD55	Promoter_Associated	Island	793	4.654	3.253e-06	+++
cg11171811	11	65326725	LTBP3;LTBP3;LTBP3		S_Shore	793	-4.647	3.374e-06	--+
cg11252792	3	125932053			Island	793	4.645	3.399e-06	+++
cg17425567	19	36422583		Promoter_Associated	Island	793	4.638	3.515e-06	++-
cg02349096	19	11450198	RAB3D;RAB3D	Promoter_Associated	Island	793	4.624	3.758e-06	++-
cg21957546	15	66790095	SNAPC5;SNAPC5	Promoter_Associated	Island	793	4.62	3.834e-06	+++
cg14797438	18	9615155	PPP4R1;PPP4R1		OpenSea	793	4.611	4.004e-06	+++
cg20648385	11	72525603	ATG16L2	Promoter_Associated	Island	793	4.605	4.131e-06	+++
cg21741689	3	128327189		Unclassified	Island	793	4.6	4.226e-06	+++
cg05363534	11	65210645	MIR612	Unclassified_Cell_type_specific	OpenSea	793	-4.599	4.252e-06	---
cg18282011	1	1590447	CDK11B;CDK11B;CDK11B;CDK11B;CDK11B;CDK11B		Island	625	4.599	4.253e-06	++?
cg20691283	2	66661461	MEIS1	Unclassified	Island	793	4.581	4.635e-06	++-
cg26578621	11	110583377	ARHGAP20;ARHGAP20	Unclassified	Island	793	4.555	5.24e-06	+++
cg27118809	22	46663960	TTC38	Promoter_Associated_Cell_type_specific	Island	625	4.552	5.316e-06	++?
cg04158069	22	50982905		Unclassified_Cell_type_specific	Island	793	4.552	5.319e-06	++-
cg27586682	1	26437624	PDIK1L;PDIK1L;PDIK1L	Promoter_Associated	Island	793	4.543	5.557e-06	+++
cg03607359	5	176057465	SNCB;SNCB;EIF4E1B;SNCB;SNCB	Unclassified	Island	793	4.541	5.587e-06	+++
cg17517865	1	112532085	KCND3;KCND3	Unclassified_Cell_type_specific	Island	793	4.513	6.377e-06	+++
cg13398782	1	23857288	E2F2;E2F2	Promoter_Associated	Island	793	4.435	9.196e-06	+++
cg16279861	11	128531312			OpenSea	793	4.435	9.221e-06	+++
cg16883533	12	7079667	PHB2;EMG1;PHB2	Promoter_Associated	Island	793	4.426	9.588e-06	++-
cg05874561	4	154709828	SFRP2	Unclassified_Cell_type_specific	Island	793	4.352	1.348e-05	+++
cg21177096	2	20212440	MATN3;MATN3	Unclassified_Cell_type_specific	Island	793	4.343	1.404e-05	+++
cg07359545	22	19711327	GP1BB;SEPT5	Unclassified_Cell_type_specific	Island	793	4.343	1.409e-05	+-+
cg09216375	1	8378378		Unclassified	Island	625	4.326	1.517e-05	++?
cg01886077	2	98612542	TMEM131	Promoter_Associated	Island	793	4.323	1.536e-05	+++
cg20127035	18	42260234	SETBP1;SETBP1;SETBP1	Unclassified_Cell_type_specific	Island	625	4.3	1.708e-05	++?
cg18108507	3	51975897	RRP9;RRP9;PARP3;PARP3	Promoter_Associated	Island	793	4.297	1.728e-05	+++
cg02892486	9	137028920		Unclassified	Island	793	4.259	2.057e-05	++-
cg05462426	1	3370836	ARHGEF16	Unclassified	N_Shore	793	4.22	2.444e-05	++-
cg04266460	16	11348956	SOCS1	Promoter_Associated	Island	793	4.204	2.628e-05	+++
cg04238983	11	65210600	MIR612	Unclassified_Cell_type_specific	OpenSea	793	-4.203	2.636e-05	-+-
cg25984791	11	108535797	DDX10	Promoter_Associated	Island	793	4.133	3.573e-05	++-
cg05484788	20	58180357	PHACTR3		Island	793	4.133	3.576e-05	+++
cg19271753	7	5396704	TNRC18	Gene_Associated_Cell_type_specific	S_Shore	793	4.126	3.693e-05	+-+
cg13961784	1	48175246		Unclassified	Island	793	4.086	4.397e-05	+++
cg10675120	10	75532504	FUT11	Promoter_Associated	Island	625	4.071	4.684e-05	++?
cg05090127	16	1350789		Unclassified	OpenSea	625	4.065	4.801e-05	++?
cg22014289	2	109952974	SH3RF3		OpenSea	625	4.064	4.819e-05	++?
cg20412726	6	167412529	FGFR1OP;FGFR1OP	Promoter_Associated	Island	625	3.966	7.304e-05	++?
cg01062691	16	11763141	SNN	Promoter_Associated	Island	793	3.894	9.851e-05	+++
cg00581979	19	47778059	PRR24	Promoter_Associated	Island	793	-3.871	0.0001082	-+-
cg26490949	13	20532080	ZMYM2;ZMYM2	Promoter_Associated	Island	793	3.857	0.0001146	++-
cg10198271	20	55966838	RBM38;RBM38		Island	793	3.748	0.0001785	+++
cg14510374	3	50365322	TUSC2	Promoter_Associated	Island	625	3.745	0.0001802	++?
cg10398288	1	205561315	MFSD4	Promoter_Associated	Island	793	3.725	0.000195	+-+
cg00037763	18	42281763	SETBP1;SETBP1		OpenSea	793	3.706	0.0002102	+++
cg23559331	17	40332958	KCNH4	Promoter_Associated	Island	793	3.7	0.0002156	++-
cg23795178	22	40053168	CACNA1I;CACNA1I	Promoter_Associated	OpenSea	793	3.662	0.0002506	++-
cg21100497	10	93668770	FGFBP3	Promoter_Associated	Island	793	3.661	0.000251	+-+
cg12767834	20	1247058	SNPH	Unclassified_Cell_type_specific	Island	569	3.618	0.0002973	+?-
cg11035174	17	79918527	NOTUM	Unclassified	Island	793	3.576	0.0003492	+++
cg02767296	19	45505053	RELB	Promoter_Associated	Island	793	-3.443	0.0005759	-+-
cg05313261	16	30134350	MAPK3;MAPK3;MAPK3	Promoter_Associated	Island	793	-3.437	0.0005879	--+
cg11776676	19	54693755	MBOAT7;MBOAT7;MBOAT7;MBOAT7;TSEN34;TSEN34	Promoter_Associated	Island	793	-3.264	0.001097	--+
cg13615187	1	205313385	KLHDC8A	Unclassified_Cell_type_specific	Island	793	3.231	0.001231	++-
cg08937729	2	9563859	ITGB1BP1;ITGB1BP1;CPSF3	Promoter_Associated	Island	793	3.205	0.001351	++-
cg17524151	16	475494	RAB11FIP3	Promoter_Associated	Island	793	3.183	0.001459	+-+
cg12150817	14	24768737	DHRS1;C14orf21;DHRS1	Promoter_Associated	Island	793	3.148	0.001646	++-
cg11836132	6	31671343	BAT5	Promoter_Associated	S_Shore	793	-2.941	0.003272	-+-
cg16757658	11	126138769	SRPR;FOXRED1	Unclassified	Island	793	2.918	0.003522	+-+
cg21044426	19	2163593	DOT1L		N_Shore	793	-2.856	0.004296	-++
cg23493127	6	144164392	LTV1	Promoter_Associated	Island	793	2.583	0.009806	+--
cg07310282	17	1627701	WDR81;WDR81;WDR81;WDR81	Promoter_Associated	N_Shore	793	2.276	0.02284	+--
cg26125384	2	70314274	PCBP1	Promoter_Associated	Island	793	-2.27	0.02322	-++
cg05280148	16	30134882	MAPK3;MAPK3;MAPK3	Promoter_Associated	S_Shore	793	-1.961	0.04983	-++
cg03607825	16	3074386	HCFC1R1;HCFC1R1;THOC6;HCFC1R1;THOC6	Promoter_Associated	Island	793	-1.813	0.06983	-++

## Sheet: Table  S9. Genes meta
Table S9. List of genes harboring the 384 CpG associated to IS in the meta-analysis.
Symbol	ID	Chromosome	Start	Stop	Map	OMIM	Description	Aliases
ACAP3	116983	1	1307929	1292383	1p36.33		ArfGAP with coiled-coil, ankyrin repeat and PH domains 3	CENTB5
PUSL1	126789	1	1308562	1311676	1p36.33		pseudouridine synthase like 1
CCNL2	81669	1	1399341	1385710	1p36.33	613482	cyclin L2	ANIA-6B, CCNM, CCNS, HCLA-ISO, HLA-ISO, PCEE, SB138
SSU72	29101	1	1574862	1541672	1p36.33	617680	SSU72 homolog, RNA polymerase II CTD phosphatase	HSPC182, PNAS-120
CDK11B	984	1	1659618	1635224	1p36.33	176873	cyclin dependent kinase 11B	CDC2L1, CDK11, CDK11-p110, CDK11-p46, CDK11-p58, CLK-1, PITSLREA, PK58, p58, p58CDC2L1, p58CLK-1
SKI	6497	1	2228318	2310212	1p36.33-p36.32	164780	SKI proto-oncogene	SGS, SKV
ARHGEF16	27237	1	3454588	3481114	1p36.32		Rho guanine nucleotide exchange factor 16	GEF16, NBR
RBP7	116362	1	9997227	10016020	1p36.22	608604	retinol binding protein 7	CRABP4, CRBP4, CRBPIV
RCC2	55920	1	17439676	17406759	1p36.13	609587	regulator of chromosome condensation 2	TD-60
HNRNPR	10236	1	23344315	23304687	1p36.12	607201	heterogeneous nuclear ribonucleoprotein R	HNRPR, hnRNP-R
RUNX3	864	1	24965157	24899510	1p36.11	600210	RUNX family transcription factor 3	AML2, CBFA3, PEBP2aC
SLC30A2	7780	1	26046117	26037251	1p36.11	609617	solute carrier family 30 member 2	PP12488, TNZD, ZNT2, ZnT-2
WDTC1	23038	1	27234612	27308635	1p36.11		WD and tetratricopeptide repeats 1	ADP, DCAF9
FAM76A	199870	1	27725960	27763115	1p35.3		family with sequence similarity 76 member A
TRNAU1AP	54952	1	28553016	28578544	1p35.3		tRNA selenocysteine 1 associated protein 1	PRO1902, SECP43, TRSPAP1
MATN1	4146	1	30723584	30711276	1p35.2	115437	matrilin 1	CMP, CRTM
PUM1	9698	1	31065716	30931505	1p35.2	607204	pumilio RNA binding family member 1	HSPUM, PUMH, PUMH1, PUML1, SCA47
MACF1	23499	1	39084166	39487137	1p34.3	608271	microtubule actin crosslinking factor 1	ABP620, ACF7, LIS9, MACF, OFC4
BMP8A	353500	1	39491625	39529868	1p34.3		bone morphogenetic protein 8a	OP-2
FOXJ3	22887	1	42336804	42176538	1p34.2	616035	forkhead box J3
HYI	81888	1	43454240	43450606	1p34.2		hydroxypyruvate isomerase (putative)	HT036
MUTYH	4595	1	45340469	45329241	1p34.1	604933	mutY DNA glycosylase	MYH
RAVER2	55225	1	64744972	64833410	1p31.3	609953	ribonucleoprotein, PTB binding 2
SYDE2	84144	1	85201724	85156380	1p22.3		synapse defective Rho GTPase homolog 2
ATXN7L2	127002	1	109483904	109492803	1p13.3		ataxin 7 like 2
AMPD2	271	1	109619812	109632054	1p13.3	102771	adenosine monophosphate deaminase 2	PCH9, SPG63
EFNA1	1942	1	155127875	155134898	1q22	191164	ephrin A1	B61, ECKLG, EFL1, EPLG1, LERK-1, LERK1, TNFAIP4
YY1AP1	55249	1	155689031	155659441	1q22	607860	YY1 associated protein 1	GRNG, HCCA1, HCCA2, YY1AP
ARHGEF2	9181	1	155991261	155946838	1q22	607560	Rho/Rac guanine nucleotide exchange factor 2	GEF, GEF-H1, GEFH1, LFP40, Lfc, NEDMHM, P40
CDC73	79577	1	193121957	193254814	1q31.2	607393	cell division cycle 73	C1orf28, FIHP, HPTJT, HRPT1, HRPT2, HYX
CSRP1	1465	1	201507122	201483529	1q32.1	123876	cysteine and glycine rich protein 1	CRP, CRP1, CSRP, CYRP, D1S181E, HEL-141, HEL-S-286
KDM5B	10765	1	202809469	202724494	1q32.1	605393	lysine demethylase 5B	CT31, JARID1B, MRT65, PLU-1, PLU1, PPP1R98, PUT1, RBBP2H1A, RBP2-H1
RASSF5	83593	1	206507530	206589447	1q32.1	607020	Ras association domain family member 5	Maxp1, NORE1, NORE1A, NORE1B, RAPL, RASSF3
MAPKAPK2	9261	1	206684904	206734282	1q32.1	602006	MAPK activated protein kinase 2	MAPKAP-K2, MK-2, MK2
DEGS1	8560	1	224183239	224193440	1q42.11	615843	delta 4-desaturase, sphingolipid 1	DEGS, DEGS-1, DES1, Des-1, FADS7, HLD18, MIG15, MLD
PYCR2	29920	1	225924339	225919876	1q42.12	616406	pyrroline-5-carboxylate reductase 2	HLD10, P5CR2
H3-3A	3020	1	226062715	226073211	1q42.12	601128	H3.3 histone A	H3.3A, H3F3, H3F3A
ITPKB	3707	1	226739295	226631689	1q42.12	147522	inositol-trisphosphate 3-kinase B	IP3-3KB, IP3K, IP3K-B, IP3KB, PIG37
ARF1	375	1	228082659	228099211	1q42.13	103180	ADP ribosylation factor 1	PVNH8
LYST	1130	1	235883712	235661030	1q42.3	606897	lysosomal trafficking regulator	CHS, CHS1
ADSS2	159	1	244452059	244408491	1q44	103060	adenylosuccinate synthase 2	ADEH, ADSS, ADSS 2
ZNF496	84838	1	247331866	247297414	1q44	613911	zinc finger protein 496	NIZP1, ZFP496, ZKSCAN17, ZSCAN49
RNASEH1	246243	2	3558370	3531812	2p25.3	604123	ribonuclease H1	H1RNA, PEOB2, RNH1
COLEC11	78989	2	3594831	3644643	2p25.3	612502	collectin subfamily member 11	3MC2, CL-K1-I, CL-K1-II, CL-K1-IIa, CL-K1-IIb, CLK1
MFSD2B	388931	2	24009021	24026774	2p23.3	617845	major facilitator superfamily domain containing 2B
GAREM2	150946	2	26173087	26202528	2p23.3	617999	GRB2 associated regulator of MAPK1 subtype 2	FAM59B, GAREML
EIF2B4	8890	2	27370456	27364351	2p23.3	606687	eukaryotic translation initiation factor 2B subunit delta	EIF-2B, EIF2B, EIF2Bdelta
LBH	81606	2	30231533	30260027	2p23.1	611763	LBH regulator of WNT signaling pathway
SPAST	6683	2	32063550	32157636	2p22.3	604277	spastin	ADPSP, FSP2, SPG4
LTBP1	4052	2	32902128	33399508	2p22.3	150390	latent transforming growth factor beta binding protein 1
USP34	9736	2	61471086	61187462	2p15	615295	ubiquitin specific peptidase 34
TGFA	7039	2	70553825	70447283	2p13.3	190170	transforming growth factor alpha	TFGA
WDR54	84058	2	74421720	74426258	2p13.1		WD repeat domain 54
RGPD1	400966	2	86913576	87013975	2p11.2	612704	RANBP2 like and GRIP domain containing 1	RGP1, RGPD2, RanBP2L2
RGPD2	729857	2	87992818	87757197	2p11.2	612705	RANBP2 like and GRIP domain containing 2	NUP358, RANBP2L2, RGP2
CIAO1	9391	2	96266158	96274172	2q11.2	604333	cytosolic iron-sulfur assembly component 1	CIA1, WDR39
SH3RF3	344558	2	109129204	109504634	2q13		SH3 domain containing ring finger 3	POSH2, SH3MD4
ZC3H6	376940	2	112275593	112340058	2q14.1		zinc finger CCCH-type containing 6	ZC3HDC6
CLASP1	23332	2	121649461	121337775	2q14.2-q14.3	605852	cytoplasmic linker associated protein 1	MAST1
SAP130	79595	2	128028058	127941216	2q14.3	609697	Sin3A associated protein 130
ACVR1	90	2	157876329	157736445	2q24.1	102576	activin A receptor type 1	ACTRI, ACVR1A, ACVRLK2, ALK2, FOP, SKR1, TSRI
SSB	6741	2	169798870	169812063	2q31.1	109090	small RNA binding exonuclease protection factor La	LARP3, La, La/SSB
UBR3	130507	2	169827453	170084130	2q31.1	613831	ubiquitin protein ligase E3 component n-recognin 3	ZNF650
TYW5	129450	2	199955623	199928912	2q33.1		tRNA-yW synthesizing protein 5	C2orf60, hTYW5
CLK1	1195	2	200864657	200853008	2q33.1	601951	CDC like kinase 1	CLK, CLK/STY, STY
PARD3B	117583	2	204545474	205620161	2q33.3		par-3 family cell polarity regulator beta	ALS2CR19, PAR3B, PAR3L, PAR3beta
NCL	4691	2	231464483	231453530	2q37.1	164035	nucleolin	C23, Nsr1
UBE2F	140739	2	237966944	238042781	2q37.3	617700	ubiquitin conjugating enzyme E2 F (putative)	NCE2
SCLY	51540	2	238061000	238099412	2q37.3	611056	selenocysteine lyase	SCL, hSCL
DTYMK	1841	2	241686814	241675746	2q37.3	188345	deoxythymidylate kinase	CDC8, PP3731, TMPK, TYMK
EDEM1	9695	3	5187706	5219962	3p26.1	607673	ER degradation enhancing alpha-mannosidase like protein 1	EDEM
OXTR	5021	3	8769613	8750402	3p25.3	167055	oxytocin receptor	OT-R
IQSEC1	9922	3	13073428	12897042	3p25.2-p25.1	610166	IQ motif and Sec7 domain ArfGEF 1	ARF-GEP100, ARFGEP100, BRAG2, GEP100
SLC6A6	6533	3	14402575	14489348	3p25.1	186854	solute carrier family 6 member 6	TAUT
COL6A4P1	344875	3	15205958	15165361	3p25.1	612397	collagen type VI alpha 4 pseudogene 1	COL6A4, COL6A4P, DIVA, DVWA, VWA6
UBE2E2	7325	3	23203006	23591924	3p24.3	602163	ubiquitin conjugating enzyme E2 E2	UBCH8
PTH1R	5745	3	46877688	46903798	3p21.31	168468	parathyroid hormone 1 receptor	EKNS, PFE, PTHR, PTHR1
ZNF589	51385	3	48241103	48270989	3p21.31	616702	zinc finger protein 589	SZF1
TMA7	51372	3	48440256	48444207	3p21.31	615808	translation machinery associated 7 homolog	CCDC72, HSPC016
ARIH2OS	646450	3	48919384	48917787	3p21.31		ariadne RBR E3 ubiquitin protein ligase 2 opposite strand	C3orf71
USP4	7375	3	49340052	49277143	3p21.31	603486	ubiquitin specific peptidase 4	UNP, Unph
CACNA2D2	9254	3	50504243	50362612	3p21.31	607082	calcium voltage-gated channel auxiliary subunit alpha2delta 2	CACNA2D, CASVDD
SFMBT1	51460	3	53046654	52899208	3p21.1	607319	Scm like with four mbt domains 1	RU1, SFMBT, hSFMBT
TASOR	23272	3	56683264	56620131	3p14.3	616493	transcription activation suppressor	C3orf63, FAM208A, RAP140, TASOR1, se89-1
ZBTB11	27107	3	101677131	101648888	3q12.3	618181	zinc finger and BTB domain containing 11	MRT69, ZNF-U69274, ZNF913
CD47	961	3	108094199	108043093	3q13.12	601028	CD47 molecule	IAP, MER6, OA3
BOC	91653	3	113211002	113287462	3q13.2	608708	BOC cell adhesion associated, oncogene regulated	CDON2
ADCY5	111	3	123448987	123282295	3q21.1	600293	adenylate cyclase 5	AC5, FDFM
CNBP	7555	3	129183895	129167826	3q21.3	116955	CCHC-type zinc finger nucleic acid binding protein	CNBP1, DM2, PROMM, RNF163, ZCCHC22, ZNF9
NCK1	4690	3	136862207	136951605	3q22.3	600508	NCK adaptor protein 1	NCK, NCKalpha, nck-1
ARMC8	25852	3	138187247	138298388	3q22.3	618521	armadillo repeat containing 8	GID5, HSPC056, S863-2, VID28
FAIM	55179	3	138608098	138633375	3q22.3	617535	Fas apoptotic inhibitory molecule	FAIM1
GMPS	8833	3	155869429	155944019	3q25.31	600358	guanine monophosphate synthase	GATD7
USP13	8975	3	179653039	179789400	3q26.33	603591	ubiquitin specific peptidase 13	ISOT3, IsoT-3
ABCF3	55324	3	184186074	184194011	3q27.1		ATP binding cassette subfamily F member 3	EST201864
EPHB3	2049	3	184561784	184582407	3q27.1	601839	EPH receptor B3	EK2, ETK2, HEK2, TYRO6
HES1	3280	3	194136147	194138731	3q29	139605	hes family bHLH transcription factor 1	HES-1, HHL, HRY, bHLHb39
TMEM175	84286	4	932386	958655	4p16.3	616660	transmembrane protein 175	hTMEM175
NSG1	27065	4	4386255	4419057	4p16.3	607645	neuronal vesicle trafficking associated 1	D4S234, D4S234E, NEEP21, P21
EVC2	132884	4	5709547	5562407	4p16.2	607261	EvC ciliary complex subunit 2	LBN, WAD
KIAA0232	9778	4	6782726	6884171	4p16.1		KIAA0232
FBXL5	26234	4	15681543	15604380	4p15.32	605655	F-box and leucine rich repeat protein 5	FBL4, FBL5, FLR1
GC	2638	4	71805519	71741692	4q13.3	139200	GC vitamin D binding protein	DBP, DBP-maf, DBP/GC, GRD3, Gc-MAF, GcMAF, HEL-S-51, VDB, VDBG, VDBP
CCNI	10983	4	77075988	77047154	4q21.1		cyclin I	CCNI1, CYC1, CYI
GPAT3	84803	4	83535633	83605874	4q21.23	610958	glycerol-3-phosphate acyltransferase 3	AGPAT 10, AGPAT10, AGPAT8, AGPAT9, HMFN0839, LPAAT-theta, MAG1
ACSL1	2180	4	184826592	184755594	4q35.1	152425	acyl-CoA synthetase long chain family member 1	ACS1, FACL1, FACL2, LACS, LACS1, LACS2
LPCAT1	79888	5	1523959	1461426	5p15.33	610472	lysophosphatidylcholine acyltransferase 1	AGPAT10, AGPAT9, AYTL2, LPCAT-1, PFAAP3, lpcat, lysoPAFAT
MTRR	4552	5	7851185	7901123	5p15.31	602568	5-methyltetrahydrofolate-homocysteine methyltransferase reductase	MSR, cblE
SLC30A5	64924	5	69093992	69131068	5q13.1-q13.2	607819	solute carrier family 30 member 5	ZNT5, ZNTL1, ZTL1, ZnT-5
JMY	133746	5	79236130	79327214	5q14.1	604279	junction mediating and regulatory protein, p53 cofactor	WHAMM2, WHDC1L3
MSH3	4437	5	80654651	80876814	5q14.1	600887	mutS homolog 3	DUP, FAP4, MRP1
FBXL17	64839	5	108382097	107859034	5q21.3	609083	F-box and leucine rich repeat protein 17	FBXO13, Fbl17, Fbx13
FEM1C	56929	5	115544777	115520907	5q22.3	608767	fem-1 homolog C	EUROIMAGE686608, EUROIMAGE783647, FEM1A
HSD17B4	3295	5	119452496	119542331	5q23.1	601860	hydroxysteroid 17-beta dehydrogenase 4	DBP, MFE-2, MPF-2, PRLTS1, SDR8C1
SLC12A2	6558	5	128083765	128189676	5q23.3	600840	solute carrier family 12 member 2	BSC, BSC2, NKCC1, PPP1R141
CCNI2	645121	5	132747425	132754402	5q31.1		cyclin I family member 2
CXXC5	51523	5	139647298	139683884	5q31.2	612752	CXXC finger protein 5	CF5, HSPC195, RINF, WID
SYNPO	11346	5	150586025	150659213	5q33.1	608155	synaptopodin
CYFIP2	26999	5	157266090	157395593	5q33.3	606323	cytoplasmic FMR1 interacting protein 2	EIEE65, PIR121
STK10	6793	5	172188223	172042073	5q35.1	603919	serine/threonine kinase 10	LOK, PRO2729
CLTB	1212	5	176416568	176392451	5q35.2	118970	clathrin light chain B	LCB
F12	2161	5	177409575	177402137	5q35.3	610619	coagulation factor XII	HAE3, HAEX, HAF
PRR7	80758	5	177445935	177456700	5q35.3	618306	proline rich 7, synaptic
CANX	821	5	179678645	179731640	5q35.3	114217	calnexin	CNX, IP90, P90
DTNBP1	84062	6	15663057	15522800	6p22.3	607145	dystrobrevin binding protein 1	BLOC1S8, DBND, HPS7, My031, SDY
WDR46	9277	6	33289238	33278206	6p21.32	611440	WD repeat domain 46	BING4, C6orf11, FP221, UTP7
ZBTB9	221504	6	33454143	33457547	6p21.32		zinc finger and BTB domain containing 9	ZNF919
SMIM29	221491	6	34249107	34246379	6p21.31	611419	small integral membrane protein 29	C6orf1, LBH
RPL10A	4736	6	35468400	35470780	6p21.31	615660	ribosomal protein L10a	CSA19, Csa-19, L10A, NEDD6
NFYA	4800	6	41072973	41102402	6p21.1	189903	nuclear transcription factor Y subunit alpha	CBF-A, CBF-B, HAP2, NF-YA
MEA1	4201	6	43017085	42980343	6p21.1	143170	male-enhanced antigen 1	HYS, MEA
POLH	5429	6	43576146	43620522	6p21.1	603968	DNA polymerase eta	RAD30, RAD30A, XP-V, XPV
KHDC1	80759	6	73310364	73241313	6q13	611688	KH domain containing 1	C6orf147, C6orf148, Em:AC019205.8, KHDC1L, NDG1, bA257K9.4
SLC17A5	26503	6	73653991	73593378	6q13	604322	solute carrier family 17 member 5	AST, ISSD, NSD, SD, SIALIN, SIASD, SLD
CD164	8763	6	109382811	109366513	6q21	603356	CD164 molecule	DFNA66, MGC-24, MGC-24v, MUC-24, endolyn
REV3L	5980	6	111483714	111299030	6q21	602776	REV3 like, DNA directed polymerase zeta catalytic subunit	POLZ, REV3
RWDD1	51389	6	116571503	116597674	6q22.1		RWD domain containing 1	CGI-24, PTD013
HEY2	23493	6	125747638	125762242	6q22.31	604674	hes related family bHLH transcription factor with YRPW motif 2	CHF1, GRIDLOCK, GRL, HERP1, HESR2, HRT2, bHLHb32
TNFAIP3	7128	6	137866316	137883311	6q23.3	191163	TNF alpha induced protein 3	A20, AISBL, OTUD7C, TNFA1P2
HECA	51696	6	139135079	139180801	6q24.1	607977	hdc homolog, cell cycle regulator	HDC, HDCL, HHDC, dJ225E12.1
LTV1	84946	6	143843272	143863811	6q24.2		LTV1 ribosome biogenesis factor	C6orf93, dJ468K18.4
ARID1B	57492	6	156776025	157210778	6q25.3	614556	AT-rich interaction domain 1B	6A3-5, BAF250B, BRIGHT, CSS1, DAN15, ELD/OSA1, MRD12, OSA2, P250R
SP4	6671	7	21428082	21514821	7p15.3	600540	Sp4 transcription factor	HF1B, SPR-1
FKBP9	11328	7	32957403	33006930	7p14.3	616257	FKBP prolyl isomerase 9	FKBP60, FKBP63, PPIase
C7orf25	79020	7	42914355	42909272	7p14.1		chromosome 7 open reading frame 25
AEBP1	165	7	44104319	44114563	7p13	602981	AE binding protein 1	ACLP
ARF1P1	442334	7	94833826	94836303	7q21.3		ADP ribosylation factor 1 pseudogene 1	ARF1
MCM7	4176	7	100101396	100092727	7q22.1	600592	minichromosome maintenance complex component 7	CDC47, MCM2, P1.1-MCM3, P1CDC47, P85MCM, PNAS146, PPP1R104
CUX1	1523	7	101815990	102283957	7q22.1	116896	cut like homeobox 1	CASP, CDP, CDP/Cut, CDP1, COY1, CUTL1, CUX, Clox, Cux/CDP, GDDI, GOLIM6, Nbla10317, p100, p110, p200, p75
ALKBH4	54784	7	102464862	102456219	7q22.1	613302	alkB homolog 4, lysine demethylase	ABH4
KRBA1	84626	7	149714944	149734574	7q36.1		KRAB-A domain containing 1
RHEB	6009	7	151519894	151466011	7q36.1	601293	Ras homolog, mTORC1 binding	RHEB2
NOM1	64434	7	156949711	156973175	7q36.3	611269	nucleolar protein with MIF4G domain 1	C7orf3, PPP1R113, SGD1
WRN	7486	8	31033748	31176137	8p12	604611	WRN RecQ like helicase	RECQ3, RECQL2, RECQL3
AP3M2	10947	8	42152945	42171182	8p11.21	610469	adaptor related protein complex 3 subunit mu 2	AP47B, CLA20, P47B
CHD7	55636	8	60678739	60868027	8q12.2	608892	chromodomain helicase DNA binding protein 7	CRG, HH5, IS3, KAL5
TP53INP1	94241	8	94949377	94925971	8q22.1	606185	tumor protein p53 inducible nuclear protein 1	SIP, TP53DINP1, TP53INP1A, TP53INP1B, Teap, p53DINP1
KLF10	7071	8	102655724	102648776	8q22.3	601878	Kruppel like factor 10	EGR-alpha, EGRA, TIEG, TIEG1
AZIN1	51582	8	102864199	102826301	8q22.3	607909	antizyme inhibitor 1	AZI, AZI1, AZIA1, OAZI, OAZIN, ODC1L
DEPTOR	64798	8	119873654	120050917	8q24.12	612974	DEP domain containing MTOR interacting protein	DEP.6, DEPDC6
FAM91A1	157769	8	123768438	123815451	8q24.13		family with sequence similarity 91 member A1
MAFA	389692	8	143430731	143428063	8q24.3	610303	MAF bZIP transcription factor A	INSDM, RIPE3b1, hMafA
PUF60	22827	8	143830040	143816343	8q24.3	604819	poly(U) binding splicing factor 60	FIR, RoBPI, SIAHBP1, VRJS
CYC1	1537	8	144095075	144097524	8q24.3	123980	cytochrome c1	MC3DN6, UQCR4
DGAT1	8694	8	144326851	144314583	8q24.3	604900	diacylglycerol O-acyltransferase 1	ARAT, ARGP1, DGAT, DIAR7
VPS28	51160	8	144428562	144423600	8q24.3	611952	VPS28 subunit of ESCRT-I
RECQL4	9401	8	144517827	144511283	8q24.3	603780	RecQ like helicase 4	RECQ4
PBX3	5090	9	125747371	125967376	9q33.3	176312	PBX homeobox 3
ST6GALNAC4	27090	9	127917051	127907885	9q34.11	606378	ST6 N-acetylgalactosaminide alpha-2,6-sialyltransferase 4	IV, SIAT3-C, SIAT3C, SIAT7-D, SIAT7D, ST6GALNACIV, ST6GalNAc
NCS1	23413	9	130172403	130237302	9q34.11	603315	neuronal calcium sensor 1	FLUP, FREQ
UCK1	83549	9	131531274	131523795	9q34.13	609328	uridine-cytidine kinase 1	URK1
TMEM250	90120	9	136118874	136114580	9q34.3		transmembrane protein 250	C9orf69
LRRC26	389816	9	137170038	137168757	9q34.3	613505	leucine rich repeat containing 26	CAPC, bA350O14.10
NELFB	25920	9	137255326	137273541	9q34.3	611180	negative elongation factor complex member B	COBRA1, NELF-B
NRARP	441478	9	137302270	137299630	9q34.3		NOTCH regulated ankyrin repeat protein
IL15RA	3601	10	5978740	5948896	10p15.1	601070	interleukin 15 receptor subunit alpha	CD215
BAMBI	25805	10	28677520	28682931	10p12.1	604444	BMP and activin membrane bound inhibitor	NMA
RASSF4	83937	10	44959752	44995890	10q11.21	610559	Ras association domain family member 4	AD037
RHEBP1	6008	10	46635845	46634501	10q11.22		RHEB pseudogene 1	RHEB, RHEB1
SLC18A3	6572	10	49610309	49612719	10q11.23	600336	solute carrier family 18 member A3	CMS21, VACHT
REEP3	221035	10	63521352	63625127	10q21.3	609348	receptor accessory protein 3	C10orf74, Yip2b
PPIF	10105	10	79347468	79355333	10q22.3	604486	peptidylprolyl isomerase F	CYP3, CyP-M, Cyp-D, CypD
WAPL	23063	10	86521815	86435255	10q23.2	610754	WAPL cohesin release factor	FOE, KIAA0261, WAPAL
PTEN	5728	10	87863624	87971929	10q23.31	601728	phosphatase and tensin homolog	10q23del, BZS, CWS1, DEC, GLM2, MHAM, MMAC1, PTEN1, PTENbeta, TEP1
SORBS1	10580	10	95561438	95311772	10q24.1	605264	sorbin and SH3 domain containing 1	CAP, FLAF2, R85FL, SH3D5, SH3P12, SORB1
GOLGA7B	401647	10	97849842	97871577	10q24.2	614189	golgin A7 family member B	C10orf132, C10orf133, bA451M19.3, bA459F3.4
BTRC	8945	10	101353807	101557320	10q24.32	603482	beta-transducin repeat containing E3 ubiquitin protein ligase	BETA-TRCP, FBW1A, FBXW1, FBXW1A, FWD1, bTrCP, bTrCP1, betaTrCP
SFR1	119392	10	104122057	104126384	10q25.1	616527	SWI5 dependent homologous recombination repair protein 1	C10orf78, MEI5, MEIR5, bA373N18.1
CASP7	840	10	113679161	113730908	10q25.3	601761	caspase 7	CASP-7, CMH-1, ICE-LAP3, LICE2, MCH3
ATE1	11101	10	121928800	121740420	10q26.13	607103	arginyltransferase 1
HMX3	340784	10	123135969	123139422	10q26.13	613380	H6 family homeobox 3	NKX-5.1, NKX5.1, Nkx5-1
OAT	4942	10	124418975	124397302	10q26.13	613349	ornithine aminotransferase	GACR, HOGA, OATASE, OKT
RNH1	6050	11	507254	494511	11p15.5	173320	ribonuclease/angiogenin inhibitor 1	RAI, RNH
UBE2L6	9246	11	57568329	57551654	11q12.1	603890	ubiquitin conjugating enzyme E2 L6	RIG-B, UBCH8
OSBP	5007	11	59615773	59574397	11q12.1	167040	oxysterol binding protein	OSBP1
MACROD1	28992	11	64166651	63998553	11q13.1	610400	mono-ADP ribosylhydrolase 1	LRP16
KCNK4	50801	11	64291301	64300030	11q13.1	605720	potassium two pore domain channel subfamily K member 4	FHEIG, K2p4.1, TRAAK, TRAAK1
ZNHIT2	741	11	65117700	65116402	11q13.1	604575	zinc finger HIT-type containing 2	C11orf5, FON
FAU	2197	11	65122133	65120629	11q13.1	134690	FAU ubiquitin like and ribosomal protein S30 fusion	FAU1, Fub1, Fubi, MNSFbeta, RPS30, S30, asr1
YAP1	10413	11	102109956	102233423	11q22.1	606608	Yes associated protein 1	COB1, YAP, YAP2, YAP65, YKI
C2CD2L	9854	11	119106751	119118543	11q23.3	617582	C2CD2 like	DLNB23, TMEM24
MCAM	4162	11	119317129	119305758	11q23.3	155735	melanoma cell adhesion molecule	CD146, HEMCAM, METCAM, MUC18, MelCAM
TBCEL	219899	11	121024071	121090775	11q23.3	610451	tubulin folding cofactor E like	El, LRRC35
ZBTB44	29068	11	130314916	130226676	11q24.3		zinc finger and BTB domain containing 44	BTBD15, HSPC063, ZNF851
WNK1	65125	12	752578	911451	12p13.33	605232	WNK lysine deficient protein kinase 1	HSAN2, HSN2, KDP, PPP1R167, PRKWNK1, PSK, p65
FBXL14	144699	12	1594580	1559640	12p13.33	609081	F-box and leucine rich repeat protein 14	Fbl14
PIANP	196500	12	6700814	6689704	12p13.31	616065	PILR alpha associated neural protein	C12orf53, LEDA1, PANP, leda-1
KLRG1	10219	12	8950043	9215656	12p13.31	604874	killer cell lectin like receptor G1	2F1, CLEC15A, MAFA, MAFA-2F1, MAFA-L, MAFA-LIKE
CNPY2	10330	12	56316347	56309843	12q13.3	605861	canopy FGF signaling regulator 2	HP10390, MSAP, TMEM4, ZSIG9
MIRLET7I	406891	12	62603685	62603768	12q14.1	612148	microRNA let-7i	LET7I, MIRNLET7I, hsa-let-7i, let-7i
RASSF3	283349	12	64610494	64697566	12q14.2	607019	Ras association domain family member 3	RASSF5
RAB21	23011	12	71754862	71800285	12q21.1	612398	RAB21, member RAS oncogene family
NFYB	4801	12	104138240	104117085	12q23.3	189904	nuclear transcription factor Y subunit beta	CBF-A, CBF-B, HAP3, NF-YB
SH2B3	10019	12	111405106	111451622	12q24.12	605093	SH2B adaptor protein 3	IDDM20, LNK
PLBD2	196463	12	113358575	113391628	12q24.13		phospholipase B domain containing 2	P76
FBXO21	23014	12	117190470	117141990	12q24.22	609095	F-box protein 21	FBX21
ORAI1	84876	12	121626549	121642039	12q24.31	610277	ORAI calcium release-activated calcium modulator 1	CRACM1, IMD9, ORAT1, TAM2, TMEM142A
RHOF	54509	12	121793687	121777753	12q24.31		ras homolog family member F, filopodia associated	ARHF, RIF
SCARB1	949	12	124863863	124776855	12q24.31	601040	scavenger receptor class B member 1	CD36L1, CLA-1, CLA1, HDLQTL6, SR-BI, SRB1
RAN	5901	12	130871878	130877677	12q24.33	601179	RAN, member RAS oncogene family	ARA24, Gsp1, TC4
PXMP2	5827	12	132687586	132704984	12q24.33	617399	peroxisomal membrane protein 2	PMP22
UBL3	5412	13	29850616	29764370	13q12.3	604711	ubiquitin like 3	HCG-1, PNSC1
FNDC3A	22862	13	48975240	49209778	13q14.2	615794	fibronectin type III domain containing 3A	FNDC3, HUGO, bA203I16.1, bA203I16.5
RNASEH2B	79621	13	50909677	50970461	13q14.3	610326	ribonuclease H2 subunit B	AGS2, DLEU8
SOX21	11166	13	94712544	94709621	13q32.1	604974	SRY-box transcription factor 21	SOX25
TUBGCP3	10426	13	112606468	112485004	13q34	617818	tubulin gamma complex associated protein 3	104p, ALP6, GCP3, Grip104, SPBC98, Spc98, Spc98p
TXNDC16	57544	14	52552582	52430589	14q22.1	616179	thioredoxin domain containing 16	ERp90, KIAA1344
GCH1	2643	14	54902825	54842004	14q22.2	600225	GTP cyclohydrolase 1	DYT14, DYT5, DYT5a, GCH, GTP-CH-1, GTPCH1, HPABH4B
HIF1A	3091	14	61695512	61748258	14q23.2	603348	hypoxia inducible factor 1 subunit alpha	HIF-1-alpha, HIF-1A, HIF-1alpha, HIF1, HIF1-ALPHA, MOP1, PASD8, bHLHe78
ZBTB1	22890	14	64504573	64533692	14q23.3	616578	zinc finger and BTB domain containing 1	ZNF909
ADCK1	57143	14	77800063	77935013	14q24.3		aarF domain containing kinase 1
TTC7B	145567	14	90816478	90524563	14q32.11		tetratricopeptide repeat domain 7B	TTC7L1, c14_5685
GPR68	8111	14	91264580	91232531	14q32.11	601404	G protein-coupled receptor 68	AI2A6, GPR12A, OGR1
PPP4R4	57718	14	94174311	94279734	14q32.12-q32.13	616790	protein phosphatase 4 regulatory subunit 4	CFAP14, KIAA1622, PP4R4
MARK3	4140	14	103385363	103503830	14q32.32-q32.33	602678	microtubule affinity regulating kinase 3	CTAK1, KP78, PAR1A, Par-1a, VIPB
CKB	1152	14	103522832	103519666	14q32.33	123280	creatine kinase B	B-CK, BCK, CKBB, CPK-B, HEL-211, HEL-S-29
UBE3A	7337	15	25439380	25333727	15q11.2	601623	ubiquitin protein ligase E3A	ANCR, AS, E6-AP, EPVE6AP, HPVE6A
GPR176	11245	15	39920938	39795048	15q14-q15.1	612183	G protein-coupled receptor 176	HB-954
BMF	90427	15	40108878	40087889	15q15.1	606266	Bcl2 modifying factor
CHAC1	79094	15	40942136	40956517	15q15.1	614587	ChaC glutathione specific gamma-glutamylcyclotransferase 1
TCF12	6938	15	56918089	57292594	15q21.3	600480	transcription factor 12	CRS3, HEB, HTF4, HsT17266, TCF-12, bHLHb20, p64
MTFMT	123263	15	65029638	65001511	15q22.31	611766	mitochondrial methionyl-tRNA formyltransferase	COXPD15, FMT1, MC1DN27
CORO2B	10391	15	68518372	68727805	15q23	605002	coronin 2B	CLIPINC
C15orf39	56905	15	75201881	75212168	15q24.2		chromosome 15 open reading frame 39
TBC1D2B	23102	15	78077710	77994984	15q24.3-q25.1		TBC1 domain family member 2B
AKAP13	11214	15	85380602	85749357	15q25.3	604686	A-kinase anchoring protein 13	AKAP-13, AKAP-Lbc, ARHGEF13, BRX, HA-3, Ht31, LBC, PRKA13, PROTO-LB, PROTO-LBC, c-lbc, p47
BLM	641	15	90717345	90816165	15q26.1	604610	BLM RecQ like helicase	BS, MGRISCE1, RECQ2, RECQL2, RECQL3
CHSY1	22856	15	101252047	101175726	15q26.3	608183	chondroitin sulfate synthase 1	CHSY, CSS1, ChSy-1, TPBS
SNRNP25	79622	16	53827	57668	16p13.3		small nuclear ribonucleoprotein U11/U12 subunit 25	C16orf33
JMJD8	339123	16	684333	681669	16p13.3		jumonji domain containing 8	C16orf20, PP14397
SOX8	30812	16	981769	986978	16p13.3	605923	SRY-box transcription factor 8
TEDC2	80178	16	2460108	2464962	16p13.3		tubulin epsilon and delta complex 2	C16orf59
SRRM2	23524	16	2750902	2771411	16p13.3	606032	serine/arginine repetitive matrix 2	300-KD, CWF21, Cwc21, HSPC075, SRL300, SRm300
ZNF174	7727	16	3401189	3409363	16p13.3	603900	zinc finger protein 174	ZSCAN8
GLYR1	84656	16	4848031	4803202	16p13.3	610660	glyoxylate reductase 1 homolog	BM045, HIBDL, N-PAC, NP60, hNDF
COQ7	10229	16	19067594	19080094	16p12.3	601683	coenzyme Q7, hydroxylase	CAT5, CLK-1, CLK1, COQ10D8
POLR3E	55718	16	22297374	22335102	16p12.2	617815	RNA polymerase III subunit E	RPC5, SIN
PPP4C	5531	16	30075993	30085376	16p11.2	602035	protein phosphatase 4 catalytic subunit	PP-X, PP4, PP4C, PPH3, PPP4, PPX
ARMC5	79798	16	31458272	31467166	16p11.2	615549	armadillo repeat containing 5	AIMAH2
C16orf87	388272	16	46831470	46796602	16q11.2		chromosome 16 open reading frame 87
USB1	79650	16	57999602	58021617	16q21	613276	U6 snRNA biogenesis phosphodiesterase 1	C16orf57, HVSL1, Mpn1, PN, hUsb1
CKLF	51192	16	66552562	66566286	16q21	616074	chemokine like factor	C32, CKLF1, CKLF2, CKLF3, CKLF4, HSPC224, UCK-1
PDP2	57546	16	66880514	66891100	16q22.1	615499	pyruvate dehyrogenase phosphatase catalytic subunit 2	PDPC 2, PPM2B, PPM2C2
CBFB	865	16	67029148	67101057	16q22.1	121360	core-binding factor subunit beta	PEBP2B
SF3B3	23450	16	70523815	70577667	16q22.1	605592	splicing factor 3b subunit 3	RSE1, SAP130, SF3b130, STAF130
ZFHX3	463	16	73891930	72782884	16q22.2-q22.3	104155	zinc finger homeobox 3	ATBF1, ATBT, C16orf47, ZFH-3, ZNF927
CDT1	81620	16	88803788	88809257	16q24.3	605525	chromatin licensing and DNA replication factor 1	DUP, RIS2
MNT	4335	17	2401059	2384072	17p13.3	603039	MAX network transcriptional repressor	MAD6, MXD6, ROX, bHLHd3
EMC6	83460	17	3668722	3669668	17p13.2		ER membrane protein complex subunit 6	RAB5IFL, TMEM93
ITGAE	3682	17	3803765	3714627	17p13.2	604682	integrin subunit alpha E	CD103, HUMINAE
GPS2	2874	17	7315359	7312660	17p13.1	601935	G protein pathway suppressor 2	AMF-1
ZBTB4	57659	17	7484248	7459365	17p13.1	612308	zinc finger and BTB domain containing 4	KAISO-L1, ZNF903
SENP3	26168	17	7561918	7571968	17p13.1	612844	SUMO specific peptidase 3	SMT3IP1, SSP3, Ulp1
ALOX12B	242	17	8087715	8072635	17p13.1	603741	arachidonate 12-lipoxygenase, 12R type	12R-LOX, ARCI2
NTN1	9423	17	9021509	9243999	17p13.1	601614	netrin 1	MRMV4, NTN1L
ZNF624	57547	17	16655209	16620733	17p11.2		zinc finger protein 624
RASD1	51655	17	17496394	17494436	17p11.2	605550	ras related dexamethasone induced 1	AGS1, DEXRAS1, MGC:26290
RNASEH1P1	284203	17	20902776	20901976	17p11.2		ribonuclease H1 pseudogene 1	RNASEH1, RNASEH1P, RNH1
KIAA0100	9703	17	28645158	28614439	17q11.2	610664	KIAA0100	BCOX, BCOX1, CT101, FMP27
MRM1	79922	17	36601582	36634697	17q12	618099	mitochondrial rRNA methyltransferase 1
THRA	7067	17	40062192	40093866	17q21.1	190120	thyroid hormone receptor alpha	AR7, CHNG6, EAR7, ERB-T-1, ERBA, ERBA1, NR1A1, THRA1, THRA2, c-ERBA-1
FMNL1	752	17	45220267	45247321	17q21.31	604656	formin like 1	C17orf1, C17orf1B, FHOD4, FMNL, KW-13
LIMD2	80774	17	63701226	63695887	17q23.3		LIM domain containing 2
ERN1	2081	17	64132468	64039141	17q23.3	604033	endoplasmic reticulum to nucleus signaling 1	IRE1, IRE1P, IRE1a, hIRE1p
SLC25A19	60386	17	75289957	75272979	17q25.1	606521	solute carrier family 25 member 19	DNC, MCPHA, MUP1, THMD3, THMD4, TPC
LLGL2	3993	17	75525079	75575208	17q25.1	618483	LLGL scribble cell polarity complex component 2	HGL, Hugl-2, LGL2
TRIM47	91107	17	75878598	75874163	17q25.1	611041	tripartite motif containing 47	GOA, RNF100
MRPL38	64978	17	75904883	75898643	17q25.1	611844	mitochondrial ribosomal protein L38	HSPC262, L38MT, MRP-L3, MRP-L38, RPML3
PRPSAP1	5635	17	76354197	76309477	17q25.1	601249	phosphoribosyl pyrophosphate synthetase associated protein 1	PAP39
PGS1	9489	17	78378622	78424658	17q25.3	614942	phosphatidylglycerophosphate synthase 1
CEP131	22994	17	81222988	81189594	17q25.3	613479	centrosomal protein 131	AZ1, AZI1, ZA1
HGS	9146	17	81684010	81702120	17q25.3	604375	hepatocyte growth factor-regulated tyrosine kinase substrate	HRS
SLC25A10	1468	17	81712235	81721015	17q25.3	606794	solute carrier family 25 member 10	DIC
P4HB	5034	17	81860534	81843158	17q25.3	176790	prolyl 4-hydroxylase subunit beta	CLCRP1, DSI, ERBA2L, GIT, P4Hbeta, PDI, PDIA1, PHDB, PO4DB, PO4HB, PROHB
ANAPC11	51529	17	81890789	81900532	17q25.3	614534	anaphase promoting complex subunit 11	APC11, Apc11p, HSPC214
FOXK2	3607	17	82519731	82604601	17q25.3	147685	forkhead box K2	ILF, ILF-1, ILF1, nGTBP
ZBTB14	7541	18	5297052	5289018	18p11.31	602126	zinc finger and BTB domain containing 14	ZF5, ZFP-161, ZFP-5, ZFP161, ZNF478
VAPA	9218	18	9914015	9960020	18p11.22	605703	VAMP associated protein A	VAP-33, VAP-A, VAP33, hVAP-33
CEP192	55125	18	12991300	13125052	18p11.21	616426	centrosomal protein 192	PPP1R62
ANKRD29	147463	18	23662913	23598925	18q11.2		ankyrin repeat domain 29
CYB5A	1528	18	74291979	74250845	18q22.3	613218	cytochrome b5 type A	CYB5, MCB5, METAG
TPGS1	91978	19	507496	519653	19p13.3		tubulin polyglutamylase complex subunit 1	C19orf20, GTRGEO22, PGs1
RNF126	55658	19	663213	647525	19p13.3	615177	ring finger protein 126
PTBP1	5725	19	797451	812315	19p13.3	600693	polypyrimidine tract binding protein 1	HNRNP-I, HNRNPI, HNRPI, PTB, PTB-1, PTB-T, PTB2, PTB3, PTB4, pPTB
PLPPR3	79948	19	824243	810965	19p13.3	610391	phospholipid phosphatase related 3	LPPR3, LPR3, PRG-2, PRG2
KISS1R	84634	19	916692	921004	19p13.3	604161	KISS1 receptor	AXOR12, CPPB1, GPR54, HH8, HOT7T175, KISS-1R
ARID3A	1820	19	925732	975938	19p13.3	603265	AT-rich interaction domain 3A	BRIGHT, DRIL1, DRIL3, E2FBP1
ARHGAP45	23526	19	1065958	1087830	19p13.3	601155	Rho GTPase activating protein 45	HA-1, HLA-HA1, HMHA1
GPX4	2879	19	1103993	1106778	19p13.3	138322	glutathione peroxidase 4	GPx-4, GSHPx-4, MCSP, PHGPx, SMDS, snGPx, snPHGPx
SBNO2	22904	19	1174267	1107636	19p13.3	615729	strawberry notch homolog 2	KIAA0963, SNO, STNO
STK11	6794	19	1205777	1228430	19p13.3	602216	serine/threonine kinase 11	LKB1, PJS, hLKB1
RPS15	6209	19	1438363	1440496	19p13.3	180535	ribosomal protein S15	RIG, S15
UQCR11	10975	19	1605461	1597168	19p13.3	609711	ubiquinol-cytochrome c reductase, complex III subunit XI	0710008D09Rik, QCR10, UQCR
OAZ1	4946	19	2269485	2273487	19p13.3	601579	ornithine decarboxylase antizyme 1	AZ1, AZI, OAZ
FEM1A	55527	19	4791733	4801272	19p13.3	613538	fem-1 homolog A	EPRAP
NRTN	4902	19	5805386	5828323	19p13.3	602018	neurturin	NTN
CAMSAP3	57662	19	7595862	7618303	19p13.2	612685	calmodulin regulated spectrin associated protein family member 3	KIAA1543, NEZHA, PPP1R80
ELAVL1	1994	19	8005640	7958572	19p13.2	603466	ELAV like RNA binding protein 1	ELAV1, HUR, Hua, MelG
DNM2	1785	19	10718052	10831909	19p13.2	602378	dynamin 2	CMT2M, CMTDI1, CMTDIB, DI-CMTB, DYN2, DYNII, LCCS5
MAST1	22983	19	12838514	12874951	19p13.13	612256	microtubule associated serine/threonine kinase 1	MCCCHCM, SAST
SLC35E1	79939	19	16572414	16549836	19p13.11		solute carrier family 35 member E1
NR2F6	2063	19	17245341	17231884	19p13.11	132880	nuclear receptor subfamily 2 group F member 6	EAR-2, EAR2, ERBAL2
FCHO1	23149	19	17747717	17788561	19p13.11	613437	FCH and mu domain containing endocytic adaptor 1
MAU2	23383	19	19320606	19358753	19p13.11	614560	MAU2 sister chromatid cohesion factor	KIAA0892, MAU2L, SCC4, mau-2
ZNF527	84503	19	37371056	37393065	19q13.12		zinc finger protein 527
PSMD8	5714	19	38374549	38383823	19q13.2	617844	proteasome 26S subunit, non-ATPase 8	HEL-S-91n, HIP6, HYPF, Nin1p, Rpn12, S14, p31
SPTBN4	57731	19	40467000	40576463	19q13.2	606214	spectrin beta, non-erythrocytic 4	CMND, NEDHND, QV, SPNB4, SPTBN3
ZNF574	64763	19	42068476	42081566	19q13.2		zinc finger protein 574	FP972
GSK3A	2931	19	42243329	42230185	19q13.2	606784	glycogen synthase kinase 3 alpha
ZNF180	7733	19	44500521	44474442	19q13.31	606740	zinc finger protein 180	HHZ168
SLC1A5	6510	19	46788593	46774882	19q13.32	109190	solute carrier family 1 member 5	AAAT, ASCT2, ATBO, M7V1, M7VS1, R16, RDRC
DHX34	9704	19	47349314	47382703	19q13.32	615475	DExH-box helicase 34	DDX34, HRH1
NAPA	8775	19	47515090	47487636	19q13.32-q13.33	603215	NSF attachment protein alpha	SNAPA
DBP	1628	19	48637378	48630029	19q13.33	124097	D-box binding PAR bZIP transcription factor	DABP, taxREB302
LHB	3972	19	49017089	49015979	19q13.33	152780	luteinizing hormone subunit beta	CGB4, HH23, LSH-B, LSH-beta
NAPSA	9476	19	50369330	50358471	19q13.33	605631	napsin A aspartic peptidase	KAP, Kdap, NAP1, NAPA, SNAPA
ZNF787	126208	19	56121294	56087365	19q13.43		zinc finger protein 787	TIP20
ZNF584	201514	19	58401471	58431395	19q13.43		zinc finger protein 584
FASTKD5	60493	20	3159864	3146518	20p13	614272	FAST kinase domains 5	dJ1187M17.5
PANK2	80025	20	3888780	3933086	20p13	606157	pantothenate kinase 2	C20orf48, HARP, HSS, NBIA1, PKAN
RIN2	54453	20	19757609	20002458	20p11.23	610222	Ras and Rab interactor 2	MACS, RASSF4
RALGAPA2	57186	20	20712643	20389529	20p11.23		Ral GTPase activating protein catalytic alpha subunit 2	AS250, C20orf74, bA287B20.1, dJ1049G11, dJ1049G11.4, p220
XRN2	22803	20	21303312	21389824	20p11.22	608851	5'-3' exoribonuclease 2
EDEM2	55741	20	35147335	35115363	20q11.22	610302	ER degradation enhancing alpha-mannosidase like protein 2	C20orf31, C20orf49, bA4204.1
PCIF1	63935	20	45934673	45948022	20q13.12		PDX1 C-terminal inhibiting factor 1	C20orf67, CAPAM, PPP1R121, hCAPAM, hPCIF1
PTPN1	5770	20	50510320	50585240	20q13.13	176885	protein tyrosine phosphatase non-receptor type 1	PTP1B
ADNP	23394	20	50931436	50888917	20q13.13	611386	activity dependent neuroprotector homeobox	ADNP1, HVDAS, MRD28
RPS21	6227	20	62386274	62388519	20q13.33	180477	ribosomal protein S21	HLDF, S21
COL9A3	1299	20	62817049	62841158	20q13.33	120270	collagen type IX alpha 3 chain	DJ885L7.4.1, EDM3, IDD, MED
HELZ2	85441	20	63574238	63558085	20q13.33	611265	helicase with zinc finger 2	PDIP-1, PRIC285
DNAJC5	80331	20	63895125	63936025	20q13.33	611203	DnaJ heat shock protein family (Hsp40) member C5	CLN4, CLN4B, CSP, DNAJC5A, NCL, mir-941-2, mir-941-3, mir-941-4, mir-941-5
ZBTB21	49854	21	42010417	41986830	21q22.3	616485	zinc finger and BTB domain containing 21	ZNF295
HSF2BP	11077	21	43659498	43453986	21q22.3	604554	heat shock transcription factor 2 binding protein
GATD3A	8209	21	44133664	44145710	21q22.3	601659	glutamine amidotransferase like class 1 domain containing 3A	C21orf33, ES1, GATD3, GT335, HES1, KNPH, KNPI
GNB1L	54584	22	19854873	19783222	22q11.21	610778	G protein subunit beta 1 like	DGCRK3, FKSG1, GY2, WDR14, WDVCF
LZTR1	8216	22	20982296	20999031	22q11.1-q11.2	600574	leucine zipper like transcription regulator 1	BTBD29, LZTR-1, NS10, NS2, SWNTS2
MAPK1	5594	22	21867679	21759656	22q11.22	176948	mitogen-activated protein kinase 1	ERK, ERK-2, ERK2, ERT1, MAPK2, P42MAPK, PRKM1, PRKM2, p38, p40, p41, p41mapk, p42-MAPK
SLC2A11	66035	22	23856702	23886311	22q11.23	610367	solute carrier family 2 member 11	GLUT10, GLUT11
GGT1	2678	22	24583749	24629004	22q11.23	612346	gamma-glutamyltransferase 1	CD224, D22S672, D22S732, GGT, GGT 1, GGTD, GTG
MYH9	4627	22	36388066	36281276	22q12.3	160775	myosin heavy chain 9	BDPLT6, DFNA17, EPSTS, FTNS, MATINS, MHA, NMHC-II-A, NMMHC-IIA, NMMHCA
SUN2	25777	22	38756013	38734726	22q13.1	613569	Sad1 and UNC84 domain containing 2	UNC84B
RANGAP1	5905	22	41302368	41244778	22q13.2	602362	Ran GTPase activating protein 1	Fug1, RANGAP, SD
SMDT1	91689	22	42079690	42084283	22q13.2	615588	single-pass membrane protein with aspartate rich tail 1	C22orf32, DDDD, EMRE
NDUFA6	4700	22	42090771	42085525	22q13.2	602138	NADH:ubiquinone oxidoreductase subunit A6	B14, CI-B14, LYRM6, MC1DN33, NADHB14
CYB5R3	1727	22	42649391	42617839	22q13.2	613213	cytochrome b5 reductase 3	B5R, DIA1
RTL6	84247	22	44498232	44492582	22q13.31		retrotransposon Gag like 6	LDOC1L, Mar6, Mart6, SIRH3, dJ1033E15.2
PPARA	5465	22	46150525	46243755	22q13.31	170998	peroxisome proliferator activated receptor alpha	NR1C1, PPAR, PPARalpha, hPPAR
PIM3	415116	22	49960771	49964071	22q13.33	610580	Pim-3 proto-oncogene, serine/threonine kinase	pim-3
SELENOO	83642	22	50201010	50217615	22q13.33	607917	selenoprotein O	SELO
CHKB	1120	22	50582998	50578957	22q13.33	612395	choline kinase beta	CHETK, CHKL, CK, CKB, CKEKB, EK, EKB, MDCMC
BGN	633	X	153494979	153509545	Xq28	301870	biglycan	DSPG1, MRLS, PG-S1, PGI, SEMDX, SLRR1A

## Sheet: Table S10. Functional meta
Table S10. Functional analysis of the 384 CpG associated to IS in the meta-analysis using Fuma.
Category	GeneSet	N_genes	N_overlap	p	adjP	genes	link
Wikipathways	T-Cell antigen Receptor (TCR) Signaling Pathway%WikiPathways_20190110%WP69%Homo sapiens	90	4	6.33312e-05	0.030779	IL15RA:SH2B3:LHB:MAPK1	http://www.wikipathways.org/instance/WP69_r97623
Wikipathways	HIF1A and PPARG regulation of glycolysis%WikiPathways_20190110%WP2456%Homo sapiens	8	2	0.000152907	0.0371565	HIF1A:AGPAT9	http://www.wikipathways.org/instance/WP2456_r96297
Reactome	REACTOME_TRIGLYCERIDE_BIOSYNTHESIS	38	3	0.000100965	0.0435187	AGPAT9:ACSL1:DGAT1	http://www.broadinstitute.org/gsea/msigdb/cards/REACTOME_TRIGLYCERIDE_BIOSYNTHESIS
Reactome	REACTOME_METABOLISM_OF_LIPIDS_AND_LIPOPROTEINS	472	7	0.000130018	0.0435187	DEGS1:VAPA:LHB:PPARA:AGPAT9:ACSL1:DGAT1	http://www.broadinstitute.org/gsea/msigdb/cards/REACTOME_METABOLISM_OF_LIPIDS_AND_LIPOPROTEINS
Reactome	REACTOME_SIGNALING_BY_FGFR_IN_DISEASE	122	4	0.000205576	0.0435187	GSK3A:MAPK1:ADCY5:CUX1	http://www.broadinstitute.org/gsea/msigdb/cards/REACTOME_SIGNALING_BY_FGFR_IN_DISEASE
Reactome	REACTOME_CIRCADIAN_CLOCK	52	3	0.000258271	0.0435187	HIF1A:DBP:PPARA	http://www.broadinstitute.org/gsea/msigdb/cards/REACTOME_CIRCADIAN_CLOCK
Canonical_Pathways	REACTOME_TRIGLYCERIDE_BIOSYNTHESIS	38	3	0.000100965	0.0572071	AGPAT9:ACSL1:DGAT1	http://www.broadinstitute.org/gsea/msigdb/cards/REACTOME_TRIGLYCERIDE_BIOSYNTHESIS
Canonical_Pathways	REACTOME_METABOLISM_OF_LIPIDS_AND_LIPOPROTEINS	472	7	0.000130018	0.0572071	DEGS1:VAPA:LHB:PPARA:AGPAT9:ACSL1:DGAT1	http://www.broadinstitute.org/gsea/msigdb/cards/REACTOME_METABOLISM_OF_LIPIDS_AND_LIPOPROTEINS
Canonical_Pathways	PID_BMP_PATHWAY	42	3	0.000136464	0.0572071	SKI:BAMBI:MAPK1	http://www.broadinstitute.org/gsea/msigdb/cards/PID_BMP_PATHWAY
Canonical_Pathways	REACTOME_SIGNALING_BY_FGFR_IN_DISEASE	122	4	0.000205576	0.0572071	GSK3A:MAPK1:ADCY5:CUX1	http://www.broadinstitute.org/gsea/msigdb/cards/REACTOME_SIGNALING_BY_FGFR_IN_DISEASE
Canonical_Pathways	SIG_INSULIN_RECEPTOR_PATHWAY_IN_CARDIAC_MYOCYTES	51	3	0.000243785	0.0572071	SORBS1:GSK3A:MAPK1	http://www.broadinstitute.org/gsea/msigdb/cards/SIG_INSULIN_RECEPTOR_PATHWAY_IN_CARDIAC_MYOCYTES
Canonical_Pathways	REACTOME_CIRCADIAN_CLOCK	52	3	0.000258271	0.0572071	HIF1A:DBP:PPARA	http://www.broadinstitute.org/gsea/msigdb/cards/REACTOME_CIRCADIAN_CLOCK
Wikipathways	PPAR signaling pathway%WikiPathways_20190110%WP3942%Homo sapiens	67	3	0.000545744	0.085216	SORBS1:PPARA:ACSL1	http://www.wikipathways.org/instance/WP3942_r94205
Wikipathways	Chromosomal and microsatellite instability in colorectal cancer %WikiPathways_20190110%WP4216%Homo sapiens	73	3	0.000701367	0.085216	NTN1:MAPK1:MSH3	http://www.wikipathways.org/instance/WP4216_r97624
Reactome	REACTOME_FATTY_ACID_TRIACYLGLYCEROL_AND_KETONE_BODY_METABOLISM	168	4	0.00069028	0.0852474	PPARA:AGPAT9:ACSL1:DGAT1	http://www.broadinstitute.org/gsea/msigdb/cards/REACTOME_FATTY_ACID_TRIACYLGLYCEROL_AND_KETONE_BODY_METABOLISM
Reactome	REACTOME_SIGNALING_BY_SCF_KIT	75	3	0.000758879	0.0852474	SH2B3:GSK3A:MAPK1	http://www.broadinstitute.org/gsea/msigdb/cards/REACTOME_SIGNALING_BY_SCF_KIT
KEGG	KEGG_PPAR_SIGNALING_PATHWAY	69	3	0.000594859	0.101496	SORBS1:PPARA:ACSL1	http://www.broadinstitute.org/gsea/msigdb/cards/KEGG_PPAR_SIGNALING_PATHWAY
KEGG	KEGG_PROGESTERONE_MEDIATED_OOCYTE_MATURATION	85	3	0.00109135	0.101496	ANAPC11:MAPK1:ADCY5	http://www.broadinstitute.org/gsea/msigdb/cards/KEGG_PROGESTERONE_MEDIATED_OOCYTE_MATURATION
Reactome	REACTOME_PHOSPHOLIPID_METABOLISM	195	4	0.00120004	0.107592	DEGS1:VAPA:AGPAT9:DGAT1	http://www.broadinstitute.org/gsea/msigdb/cards/REACTOME_PHOSPHOLIPID_METABOLISM
Reactome	REACTOME_DOWNSTREAM_SIGNAL_TRANSDUCTION	91	3	0.00132875	0.107592	GSK3A:MAPK1:ADCY5	http://www.broadinstitute.org/gsea/msigdb/cards/REACTOME_DOWNSTREAM_SIGNAL_TRANSDUCTION
Reactome	REACTOME_SIGNALING_BY_ERBB2	97	3	0.00159632	0.107592	GSK3A:MAPK1:ADCY5	http://www.broadinstitute.org/gsea/msigdb/cards/REACTOME_SIGNALING_BY_ERBB2
Reactome	REACTOME_DOWNSTREAM_SIGNALING_OF_ACTIVATED_FGFR	97	3	0.00159632	0.107592	GSK3A:MAPK1:ADCY5	http://www.broadinstitute.org/gsea/msigdb/cards/REACTOME_DOWNSTREAM_SIGNALING_OF_ACTIVATED_FGFR
Reactome	REACTOME_SIGNALING_BY_EGFR_IN_CANCER	105	3	0.00200231	0.11057	GSK3A:MAPK1:ADCY5	http://www.broadinstitute.org/gsea/msigdb/cards/REACTOME_SIGNALING_BY_EGFR_IN_CANCER
Reactome	REACTOME_CA_DEPENDENT_EVENTS	29	2	0.00214688	0.11057	MAPK1:ADCY5	http://www.broadinstitute.org/gsea/msigdb/cards/REACTOME_CA_DEPENDENT_EVENTS
Reactome	REACTOME_SIGNALING_BY_FGFR	108	3	0.0021696	0.11057	GSK3A:MAPK1:ADCY5	http://www.broadinstitute.org/gsea/msigdb/cards/REACTOME_SIGNALING_BY_FGFR
Reactome	REACTOME_SPHINGOLIPID_DE_NOVO_BIOSYNTHESIS	30	2	0.00229671	0.11057	DEGS1:VAPA	http://www.broadinstitute.org/gsea/msigdb/cards/REACTOME_SPHINGOLIPID_DE_NOVO_BIOSYNTHESIS
KEGG	KEGG_GNRH_SIGNALING_PATHWAY	101	3	0.00179213	0.111112	LHB:MAPK1:ADCY5	http://www.broadinstitute.org/gsea/msigdb/cards/KEGG_GNRH_SIGNALING_PATHWAY
KEGG	KEGG_OOCYTE_MEIOSIS	112	3	0.00240581	0.11187	ANAPC11:MAPK1:ADCY5	http://www.broadinstitute.org/gsea/msigdb/cards/KEGG_OOCYTE_MEIOSIS
Canonical_Pathways	KEGG_PPAR_SIGNALING_PATHWAY	69	3	0.000594859	0.112061	SORBS1:PPARA:ACSL1	http://www.broadinstitute.org/gsea/msigdb/cards/KEGG_PPAR_SIGNALING_PATHWAY
Canonical_Pathways	REACTOME_FATTY_ACID_TRIACYLGLYCEROL_AND_KETONE_BODY_METABOLISM	168	4	0.00069028	0.112061	PPARA:AGPAT9:ACSL1:DGAT1	http://www.broadinstitute.org/gsea/msigdb/cards/REACTOME_FATTY_ACID_TRIACYLGLYCEROL_AND_KETONE_BODY_METABOLISM
Canonical_Pathways	REACTOME_SIGNALING_BY_SCF_KIT	75	3	0.000758879	0.112061	SH2B3:GSK3A:MAPK1	http://www.broadinstitute.org/gsea/msigdb/cards/REACTOME_SIGNALING_BY_SCF_KIT
Wikipathways	Circadian rythm related genes%WikiPathways_20190110%WP3594%Homo sapiens	205	4	0.00144211	0.119125	ZFHX3:DBP:PPARA:KLF10	http://www.wikipathways.org/instance/WP3594_r87161
Wikipathways	Angiogenesis%WikiPathways_20190110%WP1539%Homo sapiens	24	2	0.00147068	0.119125	HIF1A:MAPK1	http://www.wikipathways.org/instance/WP1539_r95042
Reactome	REACTOME_SIGNALING_BY_PDGF	118	3	0.00278899	0.125318	GSK3A:MAPK1:ADCY5	http://www.broadinstitute.org/gsea/msigdb/cards/REACTOME_SIGNALING_BY_PDGF
Canonical_Pathways	KEGG_PROGESTERONE_MEDIATED_OOCYTE_MATURATION	85	3	0.00109135	0.131063	ANAPC11:MAPK1:ADCY5	http://www.broadinstitute.org/gsea/msigdb/cards/KEGG_PROGESTERONE_MEDIATED_OOCYTE_MATURATION
Canonical_Pathways	REACTOME_PHOSPHOLIPID_METABOLISM	195	4	0.00120004	0.131063	DEGS1:VAPA:AGPAT9:DGAT1	http://www.broadinstitute.org/gsea/msigdb/cards/REACTOME_PHOSPHOLIPID_METABOLISM
Canonical_Pathways	REACTOME_DOWNSTREAM_SIGNAL_TRANSDUCTION	91	3	0.00132875	0.131063	GSK3A:MAPK1:ADCY5	http://www.broadinstitute.org/gsea/msigdb/cards/REACTOME_DOWNSTREAM_SIGNAL_TRANSDUCTION
Canonical_Pathways	REACTOME_SIGNALING_BY_ERBB2	97	3	0.00159632	0.131063	GSK3A:MAPK1:ADCY5	http://www.broadinstitute.org/gsea/msigdb/cards/REACTOME_SIGNALING_BY_ERBB2
Canonical_Pathways	REACTOME_DOWNSTREAM_SIGNALING_OF_ACTIVATED_FGFR	97	3	0.00159632	0.131063	GSK3A:MAPK1:ADCY5	http://www.broadinstitute.org/gsea/msigdb/cards/REACTOME_DOWNSTREAM_SIGNALING_OF_ACTIVATED_FGFR
Canonical_Pathways	PID_VEGFR1_PATHWAY	26	2	0.00172648	0.131063	HIF1A:MAPK1	http://www.broadinstitute.org/gsea/msigdb/cards/PID_VEGFR1_PATHWAY
Canonical_Pathways	KEGG_GNRH_SIGNALING_PATHWAY	101	3	0.00179213	0.131063	LHB:MAPK1:ADCY5	http://www.broadinstitute.org/gsea/msigdb/cards/KEGG_GNRH_SIGNALING_PATHWAY
Canonical_Pathways	SIG_IL4RECEPTOR_IN_B_LYPHOCYTES	27	2	0.00186174	0.131063	GSK3A:MAPK1	http://www.broadinstitute.org/gsea/msigdb/cards/SIG_IL4RECEPTOR_IN_B_LYPHOCYTES
Canonical_Pathways	ST_GRANULE_CELL_SURVIVAL_PATHWAY	27	2	0.00186174	0.131063	ITPKB:MAPK1	http://www.broadinstitute.org/gsea/msigdb/cards/ST_GRANULE_CELL_SURVIVAL_PATHWAY
Canonical_Pathways	REACTOME_SIGNALING_BY_EGFR_IN_CANCER	105	3	0.00200231	0.131063	GSK3A:MAPK1:ADCY5	http://www.broadinstitute.org/gsea/msigdb/cards/REACTOME_SIGNALING_BY_EGFR_IN_CANCER
Canonical_Pathways	BIOCARTA_VEGF_PATHWAY	29	2	0.00214688	0.131063	HIF1A:ELAVL1	http://www.broadinstitute.org/gsea/msigdb/cards/BIOCARTA_VEGF_PATHWAY
Canonical_Pathways	REACTOME_CA_DEPENDENT_EVENTS	29	2	0.00214688	0.131063	MAPK1:ADCY5	http://www.broadinstitute.org/gsea/msigdb/cards/REACTOME_CA_DEPENDENT_EVENTS
Canonical_Pathways	REACTOME_SIGNALING_BY_FGFR	108	3	0.0021696	0.131063	GSK3A:MAPK1:ADCY5	http://www.broadinstitute.org/gsea/msigdb/cards/REACTOME_SIGNALING_BY_FGFR
Canonical_Pathways	REACTOME_SPHINGOLIPID_DE_NOVO_BIOSYNTHESIS	30	2	0.00229671	0.13271	DEGS1:VAPA	http://www.broadinstitute.org/gsea/msigdb/cards/REACTOME_SPHINGOLIPID_DE_NOVO_BIOSYNTHESIS
Canonical_Pathways	KEGG_OOCYTE_MEIOSIS	112	3	0.00240581	0.133221	ANAPC11:MAPK1:ADCY5	http://www.broadinstitute.org/gsea/msigdb/cards/KEGG_OOCYTE_MEIOSIS
KEGG	KEGG_AXON_GUIDANCE	129	3	0.00358469	0.133351	NTN1:MAPK1:EPHB3	http://www.broadinstitute.org/gsea/msigdb/cards/KEGG_AXON_GUIDANCE
Reactome	REACTOME_BMAL1_CLOCK_NPAS2_ACTIVATES_CIRCADIAN_EXPRESSION	36	2	0.00329588	0.136023	DBP:PPARA	http://www.broadinstitute.org/gsea/msigdb/cards/REACTOME_BMAL1_CLOCK_NPAS2_ACTIVATES_CIRCADIAN_EXPRESSION
Reactome	REACTOME_MEMBRANE_TRAFFICKING	127	3	0.00343084	0.136023	PUM1:NAPA:CLTB	http://www.broadinstitute.org/gsea/msigdb/cards/REACTOME_MEMBRANE_TRAFFICKING
Canonical_Pathways	PID_NETRIN_PATHWAY	32	2	0.00261078	0.138789	NTN1:MAPK1	http://www.broadinstitute.org/gsea/msigdb/cards/PID_NETRIN_PATHWAY
Canonical_Pathways	REACTOME_SIGNALING_BY_PDGF	118	3	0.00278899	0.14256	GSK3A:MAPK1:ADCY5	http://www.broadinstitute.org/gsea/msigdb/cards/REACTOME_SIGNALING_BY_PDGF
Reactome	REACTOME_NGF_SIGNALLING_VIA_TRKA_FROM_THE_PLASMA_MEMBRANE	134	3	0.00398761	0.149314	GSK3A:MAPK1:ADCY5	http://www.broadinstitute.org/gsea/msigdb/cards/REACTOME_NGF_SIGNALLING_VIA_TRKA_FROM_THE_PLASMA_MEMBRANE
Canonical_Pathways	ST_G_ALPHA_I_PATHWAY	35	2	0.00311754	0.151042	ITPKB:MAPK1	http://www.broadinstitute.org/gsea/msigdb/cards/ST_G_ALPHA_I_PATHWAY
Canonical_Pathways	ST_ADRENERGIC	36	2	0.00329588	0.151042	ITPKB:MAPK1	http://www.broadinstitute.org/gsea/msigdb/cards/ST_ADRENERGIC
Canonical_Pathways	REACTOME_BMAL1_CLOCK_NPAS2_ACTIVATES_CIRCADIAN_EXPRESSION	36	2	0.00329588	0.151042	DBP:PPARA	http://www.broadinstitute.org/gsea/msigdb/cards/REACTOME_BMAL1_CLOCK_NPAS2_ACTIVATES_CIRCADIAN_EXPRESSION
Canonical_Pathways	REACTOME_MEMBRANE_TRAFFICKING	127	3	0.00343084	0.151986	PUM1:NAPA:CLTB	http://www.broadinstitute.org/gsea/msigdb/cards/REACTOME_MEMBRANE_TRAFFICKING
Canonical_Pathways	KEGG_AXON_GUIDANCE	129	3	0.00358469	0.153679	NTN1:MAPK1:EPHB3	http://www.broadinstitute.org/gsea/msigdb/cards/KEGG_AXON_GUIDANCE
Reactome	REACTOME_PLC_BETA_MEDIATED_EVENTS	42	2	0.00446326	0.158328	MAPK1:ADCY5	http://www.broadinstitute.org/gsea/msigdb/cards/REACTOME_PLC_BETA_MEDIATED_EVENTS
Canonical_Pathways	REACTOME_NGF_SIGNALLING_VIA_TRKA_FROM_THE_PLASMA_MEMBRANE	134	3	0.00398761	0.158532	GSK3A:MAPK1:ADCY5	http://www.broadinstitute.org/gsea/msigdb/cards/REACTOME_NGF_SIGNALLING_VIA_TRKA_FROM_THE_PLASMA_MEMBRANE
Canonical_Pathways	ST_B_CELL_ANTIGEN_RECEPTOR	40	2	0.00405575	0.158532	ITPKB:MAPK1	http://www.broadinstitute.org/gsea/msigdb/cards/ST_B_CELL_ANTIGEN_RECEPTOR
Canonical_Pathways	PID_EPHB_FWD_PATHWAY	40	2	0.00405575	0.158532	MAPK1:EPHB3	http://www.broadinstitute.org/gsea/msigdb/cards/PID_EPHB_FWD_PATHWAY
Reactome	REACTOME_NOTCH1_INTRACELLULAR_DOMAIN_REGULATES_TRANSCRIPTION	44	2	0.00488893	0.164757	HIF1A:HEY2	http://www.broadinstitute.org/gsea/msigdb/cards/REACTOME_NOTCH1_INTRACELLULAR_DOMAIN_REGULATES_TRANSCRIPTION
Canonical_Pathways	REACTOME_PLC_BETA_MEDIATED_EVENTS	42	2	0.00446326	0.169476	MAPK1:ADCY5	http://www.broadinstitute.org/gsea/msigdb/cards/REACTOME_PLC_BETA_MEDIATED_EVENTS
KEGG	KEGG_GLYCEROLIPID_METABOLISM	49	2	0.00603137	0.179879	AGPAT9:DGAT1	http://www.broadinstitute.org/gsea/msigdb/cards/KEGG_GLYCEROLIPID_METABOLISM
KEGG	KEGG_MTOR_SIGNALING_PATHWAY	52	2	0.00676963	0.179879	HIF1A:MAPK1	http://www.broadinstitute.org/gsea/msigdb/cards/KEGG_MTOR_SIGNALING_PATHWAY
Canonical_Pathways	REACTOME_NOTCH1_INTRACELLULAR_DOMAIN_REGULATES_TRANSCRIPTION	44	2	0.00488893	0.180483	HIF1A:HEY2	http://www.broadinstitute.org/gsea/msigdb/cards/REACTOME_NOTCH1_INTRACELLULAR_DOMAIN_REGULATES_TRANSCRIPTION
Canonical_Pathways	ST_T_CELL_SIGNAL_TRANSDUCTION	45	2	0.00510852	0.183492	ITPKB:MAPK1	http://www.broadinstitute.org/gsea/msigdb/cards/ST_T_CELL_SIGNAL_TRANSDUCTION
Canonical_Pathways	SIG_BCR_SIGNALING_PATHWAY	46	2	0.00533257	0.1865	GSK3A:MAPK1	http://www.broadinstitute.org/gsea/msigdb/cards/SIG_BCR_SIGNALING_PATHWAY
Canonical_Pathways	PID_HES_HEY_PATHWAY	48	2	0.00579402	0.197442	HIF1A:HEY2	http://www.broadinstitute.org/gsea/msigdb/cards/PID_HES_HEY_PATHWAY
Canonical_Pathways	KEGG_GLYCEROLIPID_METABOLISM	49	2	0.00603137	0.200392	AGPAT9:DGAT1	http://www.broadinstitute.org/gsea/msigdb/cards/KEGG_GLYCEROLIPID_METABOLISM
KEGG	KEGG_COLORECTAL_CANCER	62	2	0.00950817	0.201418	MAPK1:MSH3	http://www.broadinstitute.org/gsea/msigdb/cards/KEGG_COLORECTAL_CANCER
KEGG	KEGG_CHEMOKINE_SIGNALING_PATHWAY	190	3	0.0104141	0.201418	GSK3A:MAPK1:ADCY5	http://www.broadinstitute.org/gsea/msigdb/cards/KEGG_CHEMOKINE_SIGNALING_PATHWAY
KEGG	KEGG_ADIPOCYTOKINE_SIGNALING_PATHWAY	67	2	0.0110329	0.201418	PPARA:ACSL1	http://www.broadinstitute.org/gsea/msigdb/cards/KEGG_ADIPOCYTOKINE_SIGNALING_PATHWAY
KEGG	KEGG_RENAL_CELL_CARCINOMA	70	2	0.011996	0.201418	HIF1A:MAPK1	http://www.broadinstitute.org/gsea/msigdb/cards/KEGG_RENAL_CELL_CARCINOMA
KEGG	KEGG_ADHERENS_JUNCTION	73	2	0.0129947	0.201418	SORBS1:MAPK1	http://www.broadinstitute.org/gsea/msigdb/cards/KEGG_ADHERENS_JUNCTION
Canonical_Pathways	REACTOME_GOLGI_ASSOCIATED_VESICLE_BIOGENESIS	52	2	0.00676963	0.21421	PUM1:NAPA	http://www.broadinstitute.org/gsea/msigdb/cards/REACTOME_GOLGI_ASSOCIATED_VESICLE_BIOGENESIS
Canonical_Pathways	KEGG_MTOR_SIGNALING_PATHWAY	52	2	0.00676963	0.21421	HIF1A:MAPK1	http://www.broadinstitute.org/gsea/msigdb/cards/KEGG_MTOR_SIGNALING_PATHWAY
Wikipathways	TGF-beta Signaling Pathway%WikiPathways_20190110%WP366%Homo sapiens	133	3	0.00390492	0.214934	SKI:MAPK1:KLF10	http://www.wikipathways.org/instance/WP366_r90028
Wikipathways	Ferroptosis%WikiPathways_20190110%WP4313%Homo sapiens	40	2	0.00405575	0.214934	GPX4:ACSL1	http://www.wikipathways.org/instance/WP4313_r101758
Wikipathways	IL-5 Signaling Pathway%WikiPathways_20190110%WP127%Homo sapiens	40	2	0.00405575	0.214934	GSK3A:MAPK1	http://www.wikipathways.org/instance/WP127_r78498
Wikipathways	Vitamin A and Carotenoid Metabolism%WikiPathways_20190110%WP716%Homo sapiens	43	2	0.00467384	0.214934	MAPK1:DGAT1	http://www.wikipathways.org/instance/WP716_r97560
Wikipathways	Endoderm Differentiation%WikiPathways_20190110%WP2853%Homo sapiens	144	3	0.00487352	0.214934	CDC73:ELAVL1:SP4	http://www.wikipathways.org/instance/WP2853_r88152
Wikipathways	Heart Development%WikiPathways_20190110%WP1591%Homo sapiens	46	2	0.00533257	0.214934	MAPK1:HEY2	http://www.wikipathways.org/instance/WP1591_r94736
Wikipathways	Integrated Breast Cancer Pathway%WikiPathways_20190110%WP1984%Homo sapiens	153	3	0.00576475	0.214934	BLM:GSK3A:MAPK1	http://www.wikipathways.org/instance/WP1984_r98352
Wikipathways	Wnt Signaling Pathway%WikiPathways_20190110%WP363%Homo sapiens	51	2	0.00651919	0.214934	GSK3A:MAPK1	http://www.wikipathways.org/instance/WP363_r97637
Wikipathways	Insulin Signaling%WikiPathways_20190110%WP481%Homo sapiens	161	3	0.00663378	0.214934	SORBS1:GSK3A:MAPK1	http://www.wikipathways.org/instance/WP481_r94171
Reactome	REACTOME_GOLGI_ASSOCIATED_VESICLE_BIOGENESIS	52	2	0.00676963	0.217273	PUM1:NAPA	http://www.broadinstitute.org/gsea/msigdb/cards/REACTOME_GOLGI_ASSOCIATED_VESICLE_BIOGENESIS
Wikipathways	TGF-beta Receptor Signaling%WikiPathways_20190110%WP560%Homo sapiens	56	2	0.00781437	0.237362	SKI:BAMBI	http://www.wikipathways.org/instance/WP560_r94936
Canonical_Pathways	BIOCARTA_PPARA_PATHWAY	57	2	0.0080862	0.24992	MAPK1:PPARA	http://www.broadinstitute.org/gsea/msigdb/cards/BIOCARTA_PPARA_PATHWAY
Canonical_Pathways	PID_ATF2_PATHWAY	59	2	0.00864249	0.255241	CBFB:MAPK1	http://www.broadinstitute.org/gsea/msigdb/cards/PID_ATF2_PATHWAY
Canonical_Pathways	REACTOME_TRANS_GOLGI_NETWORK_VESICLE_BUDDING	59	2	0.00864249	0.255241	PUM1:NAPA	http://www.broadinstitute.org/gsea/msigdb/cards/REACTOME_TRANS_GOLGI_NETWORK_VESICLE_BUDDING
Reactome	REACTOME_TRANS_GOLGI_NETWORK_VESICLE_BUDDING	59	2	0.00864249	0.264774	PUM1:NAPA	http://www.broadinstitute.org/gsea/msigdb/cards/REACTOME_TRANS_GOLGI_NETWORK_VESICLE_BUDDING
Canonical_Pathways	PID_TRKR_PATHWAY	62	2	0.00950817	0.268859	MAPK1:FAIM	http://www.broadinstitute.org/gsea/msigdb/cards/PID_TRKR_PATHWAY
Canonical_Pathways	KEGG_COLORECTAL_CANCER	62	2	0.00950817	0.268859	MAPK1:MSH3	http://www.broadinstitute.org/gsea/msigdb/cards/KEGG_COLORECTAL_CANCER
Canonical_Pathways	PID_ENDOTHELIN_PATHWAY	63	2	0.00980497	0.271475	MAPK1:ADCY5	http://www.broadinstitute.org/gsea/msigdb/cards/PID_ENDOTHELIN_PATHWAY
Wikipathways	Notch Signaling Pathway%WikiPathways_20190110%WP61%Homo sapiens	62	2	0.00950817	0.271822	HIF1A:HEY2	http://www.wikipathways.org/instance/WP61_r78592
Wikipathways	Oncostatin M Signaling Pathway%WikiPathways_20190110%WP2374%Homo sapiens	65	2	0.0104108	0.274203	HIF1A:MAPK1	http://www.wikipathways.org/instance/WP2374_r98073
Wikipathways	AGE/RAGE pathway%WikiPathways_20190110%WP2324%Homo sapiens	66	2	0.0107199	0.274203	HIF1A:MAPK1	http://www.wikipathways.org/instance/WP2324_r96980
KEGG	KEGG_GAP_JUNCTION	90	2	0.0192995	0.276131	MAPK1:ADCY5	http://www.broadinstitute.org/gsea/msigdb/cards/KEGG_GAP_JUNCTION
Canonical_Pathways	KEGG_CHEMOKINE_SIGNALING_PATHWAY	190	3	0.0104141	0.282457	GSK3A:MAPK1:ADCY5	http://www.broadinstitute.org/gsea/msigdb/cards/KEGG_CHEMOKINE_SIGNALING_PATHWAY
Canonical_Pathways	REACTOME_SPHINGOLIPID_METABOLISM	67	2	0.0110329	0.284606	DEGS1:VAPA	http://www.broadinstitute.org/gsea/msigdb/cards/REACTOME_SPHINGOLIPID_METABOLISM
Canonical_Pathways	KEGG_ADIPOCYTOKINE_SIGNALING_PATHWAY	67	2	0.0110329	0.284606	PPARA:ACSL1	http://www.broadinstitute.org/gsea/msigdb/cards/KEGG_ADIPOCYTOKINE_SIGNALING_PATHWAY
Canonical_Pathways	REACTOME_SIGNALING_BY_NOTCH1	68	2	0.01135	0.284606	HIF1A:HEY2	http://www.broadinstitute.org/gsea/msigdb/cards/REACTOME_SIGNALING_BY_NOTCH1
Canonical_Pathways	PID_TELOMERASE_PATHWAY	68	2	0.01135	0.284606	BLM:MAPK1	http://www.broadinstitute.org/gsea/msigdb/cards/PID_TELOMERASE_PATHWAY
Canonical_Pathways	PID_AP1_PATHWAY	70	2	0.011996	0.289868	HIF1A:CBFB	http://www.broadinstitute.org/gsea/msigdb/cards/PID_AP1_PATHWAY
Canonical_Pathways	KEGG_RENAL_CELL_CARCINOMA	70	2	0.011996	0.289868	HIF1A:MAPK1	http://www.broadinstitute.org/gsea/msigdb/cards/KEGG_RENAL_CELL_CARCINOMA
Canonical_Pathways	KEGG_ADHERENS_JUNCTION	73	2	0.0129947	0.308392	SORBS1:MAPK1	http://www.broadinstitute.org/gsea/msigdb/cards/KEGG_ADHERENS_JUNCTION
Canonical_Pathways	REACTOME_DEVELOPMENTAL_BIOLOGY	387	4	0.0134565	0.313748	TCF12:NTN1:MAPK1:PPARA	http://www.broadinstitute.org/gsea/msigdb/cards/REACTOME_DEVELOPMENTAL_BIOLOGY
KEGG	KEGG_MELANOGENESIS	101	2	0.0239335	0.317974	MAPK1:ADCY5	http://www.broadinstitute.org/gsea/msigdb/cards/KEGG_MELANOGENESIS
Reactome	REACTOME_SPHINGOLIPID_METABOLISM	67	2	0.0110329	0.318745	DEGS1:VAPA	http://www.broadinstitute.org/gsea/msigdb/cards/REACTOME_SPHINGOLIPID_METABOLISM
Reactome	REACTOME_SIGNALING_BY_NOTCH1	68	2	0.01135	0.318745	HIF1A:HEY2	http://www.broadinstitute.org/gsea/msigdb/cards/REACTOME_SIGNALING_BY_NOTCH1
Canonical_Pathways	REACTOME_SIGNALLING_BY_NGF	213	3	0.0141418	0.323929	GSK3A:MAPK1:ADCY5	http://www.broadinstitute.org/gsea/msigdb/cards/REACTOME_SIGNALLING_BY_NGF
Canonical_Pathways	REACTOME_OPIOID_SIGNALLING	77	2	0.0143806	0.323929	MAPK1:ADCY5	http://www.broadinstitute.org/gsea/msigdb/cards/REACTOME_OPIOID_SIGNALLING
Wikipathways	Leptin signaling pathway%WikiPathways_20190110%WP2034%Homo sapiens	76	2	0.0140284	0.324657	GSK3A:MAPK1	http://www.wikipathways.org/instance/WP2034_r89856
Canonical_Pathways	REACTOME_GLYCEROPHOSPHOLIPID_BIOSYNTHESIS	82	2	0.0161986	0.35193	AGPAT9:DGAT1	http://www.broadinstitute.org/gsea/msigdb/cards/REACTOME_GLYCEROPHOSPHOLIPID_BIOSYNTHESIS
Canonical_Pathways	PID_SMAD2_3NUCLEAR_PATHWAY	82	2	0.0161986	0.35193	SKI:CBFB	http://www.broadinstitute.org/gsea/msigdb/cards/PID_SMAD2_3NUCLEAR_PATHWAY
Canonical_Pathways	PID_CMYB_PATHWAY	84	2	0.0169519	0.357605	SKI:ZFHX3	http://www.broadinstitute.org/gsea/msigdb/cards/PID_CMYB_PATHWAY
Reactome	REACTOME_DEVELOPMENTAL_BIOLOGY	387	4	0.0134565	0.358983	TCF12:NTN1:MAPK1:PPARA	http://www.broadinstitute.org/gsea/msigdb/cards/REACTOME_DEVELOPMENTAL_BIOLOGY
Reactome	REACTOME_SIGNALLING_BY_NGF	213	3	0.0141418	0.358983	GSK3A:MAPK1:ADCY5	http://www.broadinstitute.org/gsea/msigdb/cards/REACTOME_SIGNALLING_BY_NGF
Reactome	REACTOME_OPIOID_SIGNALLING	77	2	0.0143806	0.358983	MAPK1:ADCY5	http://www.broadinstitute.org/gsea/msigdb/cards/REACTOME_OPIOID_SIGNALLING
Canonical_Pathways	REACTOME_SIGNALING_BY_ERBB4	87	2	0.0181094	0.376053	GSK3A:MAPK1	http://www.broadinstitute.org/gsea/msigdb/cards/REACTOME_SIGNALING_BY_ERBB4
KEGG	KEGG_VASCULAR_SMOOTH_MUSCLE_CONTRACTION	115	2	0.0304165	0.377165	MAPK1:ADCY5	http://www.broadinstitute.org/gsea/msigdb/cards/KEGG_VASCULAR_SMOOTH_MUSCLE_CONTRACTION
Wikipathways	Pyrimidine metabolism%WikiPathways_20190110%WP4022%Homo sapiens	85	2	0.0173341	0.382926	POLR3E:UCK1	http://www.wikipathways.org/instance/WP4022_r95459
BioCarta	BIOCARTA_VEGF_PATHWAY	29	2	0.00214688	0.386328	HIF1A:ELAVL1	http://www.broadinstitute.org/gsea/msigdb/cards/BIOCARTA_VEGF_PATHWAY
BioCarta	BIOCARTA_PPARA_PATHWAY	57	2	0.0080862	0.386328	MAPK1:PPARA	http://www.broadinstitute.org/gsea/msigdb/cards/BIOCARTA_PPARA_PATHWAY
KEGG	KEGG_NEUROTROPHIN_SIGNALING_PATHWAY	126	2	0.0359412	0.38965	SH2B3:MAPK1	http://www.broadinstitute.org/gsea/msigdb/cards/KEGG_NEUROTROPHIN_SIGNALING_PATHWAY
KEGG	KEGG_TIGHT_JUNCTION	132	2	0.0391056	0.38965	LLGL2:VAPA	http://www.broadinstitute.org/gsea/msigdb/cards/KEGG_TIGHT_JUNCTION
KEGG	KEGG_INSULIN_SIGNALING_PATHWAY	137	2	0.0418207	0.38965	SORBS1:MAPK1	http://www.broadinstitute.org/gsea/msigdb/cards/KEGG_INSULIN_SIGNALING_PATHWAY
KEGG	KEGG_PATHWAYS_IN_CANCER	325	3	0.0418978	0.38965	HIF1A:MAPK1:MSH3	http://www.broadinstitute.org/gsea/msigdb/cards/KEGG_PATHWAYS_IN_CANCER
Reactome	REACTOME_GLYCEROPHOSPHOLIPID_BIOSYNTHESIS	82	2	0.0161986	0.389732	AGPAT9:DGAT1	http://www.broadinstitute.org/gsea/msigdb/cards/REACTOME_GLYCEROPHOSPHOLIPID_BIOSYNTHESIS
Reactome	REACTOME_SIGNALING_BY_ERBB4	87	2	0.0181094	0.389732	GSK3A:MAPK1	http://www.broadinstitute.org/gsea/msigdb/cards/REACTOME_SIGNALING_BY_ERBB4
Reactome	REACTOME_TRANSPORT_OF_INORGANIC_CATIONS_ANIONS_AND_AMINO_ACIDS_OLIGOPEPTIDES	93	2	0.0205216	0.389732	SLC25A10:SLC25A10:SLC12A2	http://www.broadinstitute.org/gsea/msigdb/cards/REACTOME_TRANSPORT_OF_INORGANIC_CATIONS_ANIONS_AND_AMINO_ACIDS_OLIGOPEPTIDES
Reactome	REACTOME_SIGNALING_BY_NOTCH	100	2	0.0234951	0.389732	HIF1A:HEY2	http://www.broadinstitute.org/gsea/msigdb/cards/REACTOME_SIGNALING_BY_NOTCH
Reactome	REACTOME_PPARA_ACTIVATES_GENE_EXPRESSION	104	2	0.0252689	0.389732	PPARA:ACSL1	http://www.broadinstitute.org/gsea/msigdb/cards/REACTOME_PPARA_ACTIVATES_GENE_EXPRESSION
Reactome	REACTOME_NEURONAL_SYSTEM	276	3	0.0277872	0.389732	KCNK4:MAPK1:ADCY5	http://www.broadinstitute.org/gsea/msigdb/cards/REACTOME_NEURONAL_SYSTEM
Reactome	REACTOME_G_ALPHA_S_SIGNALLING_EVENTS	120	2	0.0328824	0.389732	LHB:ADCY5	http://www.broadinstitute.org/gsea/msigdb/cards/REACTOME_G_ALPHA_S_SIGNALLING_EVENTS
Reactome	REACTOME_NEUROTRANSMITTER_RECEPTOR_BINDING_AND_DOWNSTREAM_TRANSMISSION_IN_THE_POSTSYNAPTIC_CELL	135	2	0.0407263	0.389732	MAPK1:ADCY5	http://www.broadinstitute.org/gsea/msigdb/cards/REACTOME_NEUROTRANSMITTER_RECEPTOR_BINDING_AND_DOWNSTREAM_TRANSMISSION_IN_THE_POSTSYNAPTIC_CELL
Canonical_Pathways	KEGG_GAP_JUNCTION	90	2	0.0192995	0.3946	MAPK1:ADCY5	http://www.broadinstitute.org/gsea/msigdb/cards/KEGG_GAP_JUNCTION
Canonical_Pathways	REACTOME_TRANSPORT_OF_INORGANIC_CATIONS_ANIONS_AND_AMINO_ACIDS_OLIGOPEPTIDES	93	2	0.0205216	0.400807	SLC25A10:SLC25A10:SLC12A2	http://www.broadinstitute.org/gsea/msigdb/cards/REACTOME_TRANSPORT_OF_INORGANIC_CATIONS_ANIONS_AND_AMINO_ACIDS_OLIGOPEPTIDES
Canonical_Pathways	REACTOME_SIGNALING_BY_NOTCH	100	2	0.0234951	0.400807	HIF1A:HEY2	http://www.broadinstitute.org/gsea/msigdb/cards/REACTOME_SIGNALING_BY_NOTCH
Canonical_Pathways	KEGG_MELANOGENESIS	101	2	0.0239335	0.400807	MAPK1:ADCY5	http://www.broadinstitute.org/gsea/msigdb/cards/KEGG_MELANOGENESIS
Canonical_Pathways	REACTOME_PPARA_ACTIVATES_GENE_EXPRESSION	104	2	0.0252689	0.400807	PPARA:ACSL1	http://www.broadinstitute.org/gsea/msigdb/cards/REACTOME_PPARA_ACTIVATES_GENE_EXPRESSION
Canonical_Pathways	REACTOME_NEURONAL_SYSTEM	276	3	0.0277872	0.400807	KCNK4:MAPK1:ADCY5	http://www.broadinstitute.org/gsea/msigdb/cards/REACTOME_NEURONAL_SYSTEM
Canonical_Pathways	KEGG_VASCULAR_SMOOTH_MUSCLE_CONTRACTION	115	2	0.0304165	0.400807	MAPK1:ADCY5	http://www.broadinstitute.org/gsea/msigdb/cards/KEGG_VASCULAR_SMOOTH_MUSCLE_CONTRACTION
Canonical_Pathways	REACTOME_G_ALPHA_S_SIGNALLING_EVENTS	120	2	0.0328824	0.400807	LHB:ADCY5	http://www.broadinstitute.org/gsea/msigdb/cards/REACTOME_G_ALPHA_S_SIGNALLING_EVENTS
Canonical_Pathways	KEGG_NEUROTROPHIN_SIGNALING_PATHWAY	126	2	0.0359412	0.400807	SH2B3:MAPK1	http://www.broadinstitute.org/gsea/msigdb/cards/KEGG_NEUROTROPHIN_SIGNALING_PATHWAY
Canonical_Pathways	KEGG_TIGHT_JUNCTION	132	2	0.0391056	0.400807	LLGL2:VAPA	http://www.broadinstitute.org/gsea/msigdb/cards/KEGG_TIGHT_JUNCTION
Canonical_Pathways	REACTOME_NEUROTRANSMITTER_RECEPTOR_BINDING_AND_DOWNSTREAM_TRANSMISSION_IN_THE_POSTSYNAPTIC_CELL	135	2	0.0407263	0.400807	MAPK1:ADCY5	http://www.broadinstitute.org/gsea/msigdb/cards/REACTOME_NEUROTRANSMITTER_RECEPTOR_BINDING_AND_DOWNSTREAM_TRANSMISSION_IN_THE_POSTSYNAPTIC_CELL
Canonical_Pathways	KEGG_INSULIN_SIGNALING_PATHWAY	137	2	0.0418207	0.400807	SORBS1:MAPK1	http://www.broadinstitute.org/gsea/msigdb/cards/KEGG_INSULIN_SIGNALING_PATHWAY
Canonical_Pathways	KEGG_PATHWAYS_IN_CANCER	325	3	0.0418978	0.400807	HIF1A:MAPK1:MSH3	http://www.broadinstitute.org/gsea/msigdb/cards/KEGG_PATHWAYS_IN_CANCER
Wikipathways	B Cell Receptor Signaling Pathway%WikiPathways_20190110%WP23%Homo sapiens	98	2	0.0226283	0.432693	GSK3A:MAPK1	http://www.wikipathways.org/instance/WP23_r92558
Wikipathways	Integrin-mediated Cell Adhesion%WikiPathways_20190110%WP185%Homo sapiens	102	2	0.0243753	0.432693	SORBS1:MAPK1	http://www.wikipathways.org/instance/WP185_r88160
Wikipathways	Thermogenesis%WikiPathways_20190110%WP4321%Homo sapiens	108	2	0.0270957	0.432693	ADCY5:ACSL1	http://www.wikipathways.org/instance/WP4321_r98055
Wikipathways	Spinal Cord Injury%WikiPathways_20190110%WP2431%Homo sapiens	118	2	0.0318868	0.432693	NTN1:MAPK1	http://www.wikipathways.org/instance/WP2431_r101932
Wikipathways	Focal Adhesion-PI3K-Akt-mTOR-signaling pathway%WikiPathways_20190110%WP3932%Homo sapiens	307	3	0.0363632	0.432693	HIF1A:ELAVL1:MAPK1	http://www.wikipathways.org/instance/WP3932_r102154
Wikipathways	Adipogenesis%WikiPathways_20190110%WP236%Homo sapiens	130	2	0.0380393	0.432693	HIF1A:PPARA	http://www.wikipathways.org/instance/WP236_r97606
Wikipathways	Ebola Virus Pathway on Host%WikiPathways_20190110%WP4217%Homo sapiens	131	2	0.038571	0.432693	MAPK1:CLTB	http://www.wikipathways.org/instance/WP4217_r101851
Wikipathways	Angiopoietin Like Protein 8 Regulatory Pathway%WikiPathways_20190110%WP3915%Homo sapiens	132	2	0.0391056	0.432693	GSK3A:MAPK1	http://www.wikipathways.org/instance/WP3915_r94801
Wikipathways	Nonalcoholic fatty liver disease%WikiPathways_20190110%WP4396%Homo sapiens	153	2	0.0509623	0.432693	GSK3A:PPARA	http://www.wikipathways.org/instance/WP4396_r98945
Wikipathways	Breast cancer pathway%WikiPathways_20190110%WP4262%Homo sapiens	155	2	0.0521515	0.432693	MAPK1:HEY2	http://www.wikipathways.org/instance/WP4262_r97132
Wikipathways	Epithelial to mesenchymal transition in colorectal cancer%WikiPathways_20190110%WP4239%Homo sapiens	160	2	0.0551675	0.432693	HIF1A:MAPK1	http://www.wikipathways.org/instance/WP4239_r97604
Wikipathways	Chemokine signaling pathway%WikiPathways_20190110%WP3929%Homo sapiens	165	2	0.0582438	0.432693	MAPK1:ADCY5	http://www.wikipathways.org/instance/WP3929_r90949
Canonical_Pathways	REACTOME_TRANSMISSION_ACROSS_CHEMICAL_SYNAPSES	184	2	0.0704511	0.433074	MAPK1:ADCY5	http://www.broadinstitute.org/gsea/msigdb/cards/REACTOME_TRANSMISSION_ACROSS_CHEMICAL_SYNAPSES
Canonical_Pathways	REACTOME_TRANSMEMBRANE_TRANSPORT_OF_SMALL_MOLECULES	410	3	0.0732779	0.438554	SLC25A10:SLC25A10:ADCY5:SLC12A2	http://www.broadinstitute.org/gsea/msigdb/cards/REACTOME_TRANSMEMBRANE_TRANSPORT_OF_SMALL_MOLECULES
Canonical_Pathways	REACTOME_METABOLISM_OF_AMINO_ACIDS_AND_DERIVATIVES	196	2	0.078553	0.438554	SLC25A10:SLC25A10:LHB	http://www.broadinstitute.org/gsea/msigdb/cards/REACTOME_METABOLISM_OF_AMINO_ACIDS_AND_DERIVATIVES
Reactome	REACTOME_TRANSMISSION_ACROSS_CHEMICAL_SYNAPSES	184	2	0.0704511	0.453908	MAPK1:ADCY5	http://www.broadinstitute.org/gsea/msigdb/cards/REACTOME_TRANSMISSION_ACROSS_CHEMICAL_SYNAPSES
Reactome	REACTOME_TRANSMEMBRANE_TRANSPORT_OF_SMALL_MOLECULES	410	3	0.0732779	0.454786	SLC25A10:SLC25A10:ADCY5:SLC12A2	http://www.broadinstitute.org/gsea/msigdb/cards/REACTOME_TRANSMEMBRANE_TRANSPORT_OF_SMALL_MOLECULES
Reactome	REACTOME_METABOLISM_OF_AMINO_ACIDS_AND_DERIVATIVES	196	2	0.078553	0.454786	SLC25A10:SLC25A10:LHB	http://www.broadinstitute.org/gsea/msigdb/cards/REACTOME_METABOLISM_OF_AMINO_ACIDS_AND_DERIVATIVES
Positional_gene_sets	chr19p13	571	6	0.00235227	0.468814	RNF126:GPX4:CAMSAP3:ELAVL1:SLC35E1:FCHO1	http://www.broadinstitute.org/gsea/msigdb/cards/chr19p13
Positional_gene_sets	chr17p13	248	4	0.00287616	0.468814	GPS2:ZBTB4:SENP3:NTN1	http://www.broadinstitute.org/gsea/msigdb/cards/chr17p13
Canonical_Pathways	REACTOME_METABOLISM_OF_MRNA	227	2	0.100711	0.47771	RPS15:ELAVL1	http://www.broadinstitute.org/gsea/msigdb/cards/REACTOME_METABOLISM_OF_MRNA
Canonical_Pathways	REACTOME_METABOLISM_OF_CARBOHYDRATES	239	2	0.109707	0.494239	CHSY1:SLC25A10:SLC25A10	http://www.broadinstitute.org/gsea/msigdb/cards/REACTOME_METABOLISM_OF_CARBOHYDRATES
Canonical_Pathways	REACTOME_SLC_MEDIATED_TRANSMEMBRANE_TRANSPORT	240	2	0.110466	0.495977	SLC25A10:SLC25A10:SLC12A2	http://www.broadinstitute.org/gsea/msigdb/cards/REACTOME_SLC_MEDIATED_TRANSMEMBRANE_TRANSPORT
Canonical_Pathways	REACTOME_AXON_GUIDANCE	242	2	0.111989	0.496109	NTN1:MAPK1	http://www.broadinstitute.org/gsea/msigdb/cards/REACTOME_AXON_GUIDANCE
GO_bp	GO_REGULATION_OF_CELL_DIFFERENTIATION	1488	19	1.39545e-09	6.1902e-06	SKI:RCC2:CDC73:ITPKB:BAMBI:HIF1A:ZBTB1:TCF12:ZFHX3:NTN1:ELAVL1:GSK3A:ADNP:MAPK1:PPARA:EPHB3:HEY2:CUX1:KLF10	http://www.broadinstitute.org/gsea/msigdb/cards/GO_REGULATION_OF_CELL_DIFFERENTIATION
GO_bp	GO_POSITIVE_REGULATION_OF_BIOSYNTHETIC_PROCESS	1800	19	3.02489e-08	6.70921e-05	CCNL2:SKI:CDC73:BAMBI:SORBS1:HIF1A:TCF12:BLM:CBFB:ZFHX3:ELAVL1:GSK3A:DBP:ADNP:MAPK1:PPARA:ADCY5:JMY:HEY2	http://www.broadinstitute.org/gsea/msigdb/cards/GO_POSITIVE_REGULATION_OF_BIOSYNTHETIC_PROCESS
GO_bp	GO_NEGATIVE_REGULATION_OF_NITROGEN_COMPOUND_METABOLIC_PROCESS	1513	17	7.54642e-08	8.7749e-05	SKI:PUM1:CDC73:HIF1A:ZBTB1:BLM:ZFHX3:GPS2:ZBTB4:RASD1:GSK3A:PPARA:MSH3:CXXC5:HEY2:CUX1:KLF10	http://www.broadinstitute.org/gsea/msigdb/cards/GO_NEGATIVE_REGULATION_OF_NITROGEN_COMPOUND_METABOLIC_PROCESS
GO_bp	GO_REGULATION_OF_CELL_DEVELOPMENT	834	13	7.91245e-08	8.7749e-05	SKI:RCC2:BAMBI:HIF1A:TCF12:ZFHX3:NTN1:ELAVL1:GSK3A:ADNP:EPHB3:HEY2:CUX1	http://www.broadinstitute.org/gsea/msigdb/cards/GO_REGULATION_OF_CELL_DEVELOPMENT
GO_bp	GO_REGULATION_OF_TRANSCRIPTION_FROM_RNA_POLYMERASE_II_PROMOTER	1780	18	1.41881e-07	0.00012532	CCNL2:SKI:CDC73:HIF1A:ZBTB1:TCF12:CBFB:ZFHX3:GPS2:ZBTB4:DBP:PPARA:JMY:CXXC5:HEY2:SP4:CUX1:KLF10	http://www.broadinstitute.org/gsea/msigdb/cards/GO_REGULATION_OF_TRANSCRIPTION_FROM_RNA_POLYMERASE_II_PROMOTER
GO_bp	GO_NEGATIVE_REGULATION_OF_TRANSCRIPTION_FROM_RNA_POLYMERASE_II_PROMOTER	739	12	1.69504e-07	0.00012532	SKI:CDC73:HIF1A:ZBTB1:ZFHX3:GPS2:ZBTB4:PPARA:CXXC5:HEY2:CUX1:KLF10	http://www.broadinstitute.org/gsea/msigdb/cards/GO_NEGATIVE_REGULATION_OF_TRANSCRIPTION_FROM_RNA_POLYMERASE_II_PROMOTER
GO_bp	GO_NEGATIVE_REGULATION_OF_GENE_EXPRESSION	1489	16	3.52026e-07	0.000223084	SKI:PUM1:CDC73:HIF1A:ZBTB1:CHAC1:ZFHX3:GPS2:ZBTB4:RASD1:ADNP:PPARA:CXXC5:HEY2:CUX1:KLF10	http://www.broadinstitute.org/gsea/msigdb/cards/GO_NEGATIVE_REGULATION_OF_GENE_EXPRESSION
GO_bp	GO_NEUROGENESIS	1401	15	9.02104e-07	0.000500217	SKI:HIF1A:CHAC1:TCF12:ZFHX3:NTN1:LLGL2:VAPA:CAMSAP3:NAPA:ADNP:MAPK1:EPHB3:HEY2:CUX1	http://www.broadinstitute.org/gsea/msigdb/cards/GO_NEUROGENESIS
GO_bp	GO_NEGATIVE_REGULATION_OF_CELL_DIFFERENTIATION	608	10	1.74882e-06	0.000861975	SKI:RCC2:CDC73:ITPKB:ZFHX3:NTN1:GSK3A:MAPK1:PPARA:HEY2	http://www.broadinstitute.org/gsea/msigdb/cards/GO_NEGATIVE_REGULATION_OF_CELL_DIFFERENTIATION
GO_bp	GO_NEGATIVE_REGULATION_OF_DEVELOPMENTAL_PROCESS	800	11	2.89238e-06	0.00128306	SKI:RCC2:CDC73:ITPKB:HIF1A:ZFHX3:NTN1:GSK3A:MAPK1:PPARA:HEY2	http://www.broadinstitute.org/gsea/msigdb/cards/GO_NEGATIVE_REGULATION_OF_DEVELOPMENTAL_PROCESS
GO_bp	GO_CELLULAR_RESPONSE_TO_ORGANIC_SUBSTANCE	1844	16	5.66404e-06	0.00228415	SKI:CDC73:IL15RA:BAMBI:SORBS1:KCNK4:HIF1A:BLM:PPP4C:RNF126:GSK3A:MAPK1:PPARA:ADCY5:ACSL1:KLF10	http://www.broadinstitute.org/gsea/msigdb/cards/GO_CELLULAR_RESPONSE_TO_ORGANIC_SUBSTANCE
GO_bp	GO_REGULATION_OF_MULTICELLULAR_ORGANISMAL_DEVELOPMENT	1667	15	7.53661e-06	0.00278603	SKI:CDC73:ITPKB:BAMBI:HIF1A:ZBTB1:TCF12:ZFHX3:NTN1:GSK3A:ADNP:EPHB3:HEY2:CUX1:KLF10	http://www.broadinstitute.org/gsea/msigdb/cards/GO_REGULATION_OF_MULTICELLULAR_ORGANISMAL_DEVELOPMENT
GO_cc	GO_NUCLEOPLASM_PART	705	10	6.45618e-06	0.00374459	CCNL2:SKI:CDC73:HIF1A:ZBTB1:BLM:POLR3E:ZFHX3:SENP3:HEY2	http://www.broadinstitute.org/gsea/msigdb/cards/GO_NUCLEOPLASM_PART
GO_bp	GO_POSITIVE_REGULATION_OF_GENE_EXPRESSION	1728	15	1.15519e-05	0.00377855	CCNL2:SKI:CDC73:BAMBI:HIF1A:TCF12:BLM:CBFB:ZFHX3:ELAVL1:DBP:MAPK1:PPARA:JMY:HEY2	http://www.broadinstitute.org/gsea/msigdb/cards/GO_POSITIVE_REGULATION_OF_GENE_EXPRESSION
GO_bp	GO_REGULATION_OF_CELL_CYCLE	949	11	1.4423e-05	0.00377855	CCNL2:RCC2:PUM1:YY1AP1:CDC73:BLM:ZFHX3:ANAPC11:PIM3:JMY:HECA	http://www.broadinstitute.org/gsea/msigdb/cards/GO_REGULATION_OF_CELL_CYCLE
GO_bp	GO_POSITIVE_REGULATION_OF_DEVELOPMENTAL_PROCESS	1138	12	1.46272e-05	0.00377855	ITPKB:BAMBI:HIF1A:ZBTB1:TCF12:ZFHX3:NTN1:ADNP:EPHB3:HEY2:CUX1:KLF10	http://www.broadinstitute.org/gsea/msigdb/cards/GO_POSITIVE_REGULATION_OF_DEVELOPMENTAL_PROCESS
GO_bp	GO_SMALL_MOLECULE_METABOLIC_PROCESS	1764	15	1.47305e-05	0.00377855	DEGS1:ITPKB:MACROD1:HIF1A:CHSY1:SLC25A10:SLC25A10:GPX4:LHB:PANK2:MAPK1:PPARA:ADCY5:ACSL1:DGAT1:UCK1	http://www.broadinstitute.org/gsea/msigdb/cards/GO_SMALL_MOLECULE_METABOLIC_PROCESS
GO_bp	GO_SINGLE_ORGANISM_BIOSYNTHETIC_PROCESS	1339	13	1.4918e-05	0.00377855	DEGS1:ZBTB1:CHSY1:SLC25A10:SLC25A10:VAPA:LHB:PANK2:ADCY5:AGPAT9:ACSL1:REV3L:DGAT1:UCK1	http://www.broadinstitute.org/gsea/msigdb/cards/GO_SINGLE_ORGANISM_BIOSYNTHETIC_PROCESS
GO_bp	GO_POSITIVE_REGULATION_OF_CELLULAR_COMPONENT_ORGANIZATION	1151	12	1.6366e-05	0.00377855	RCC2:BAMBI:SORBS1:HIF1A:NTN1:ANAPC11:GSK3A:ADNP:MAPK1:EPHB3:JMY:CUX1	http://www.broadinstitute.org/gsea/msigdb/cards/GO_POSITIVE_REGULATION_OF_CELLULAR_COMPONENT_ORGANIZATION
GO_bp	GO_CELLULAR_RESPONSE_TO_STRESS	1562	14	1.6515e-05	0.00377855	MACROD1:HIF1A:ZBTB1:CHAC1:BLM:GPS2:ZBTB4:RNF126:GSK3A:MAPK1:JMY:MSH3:REV3L:KLF10	http://www.broadinstitute.org/gsea/msigdb/cards/GO_CELLULAR_RESPONSE_TO_STRESS
GO_bp	GO_POSITIVE_REGULATION_OF_MOLECULAR_FUNCTION	1786	15	1.70359e-05	0.00377855	CCNL2:SKI:RCC2:SYDE2:BAMBI:HIF1A:LLGL2:ANAPC11:GSK3A:ADNP:MAPK1:ADCY5:ACSL1:JMY:MSH3	http://www.broadinstitute.org/gsea/msigdb/cards/GO_POSITIVE_REGULATION_OF_MOLECULAR_FUNCTION
GO_bp	GO_POSITIVE_REGULATION_OF_MULTICELLULAR_ORGANISMAL_PROCESS	1391	13	2.22372e-05	0.00469734	ITPKB:BAMBI:HIF1A:ZBTB1:TCF12:POLR3E:NTN1:GSK3A:ADNP:EPHB3:HEY2:CUX1:KLF10	http://www.broadinstitute.org/gsea/msigdb/cards/GO_POSITIVE_REGULATION_OF_MULTICELLULAR_ORGANISMAL_PROCESS
GO_bp	GO_POSITIVE_REGULATION_OF_CELL_DIFFERENTIATION	820	10	2.37208e-05	0.0047573	ITPKB:BAMBI:HIF1A:ZBTB1:TCF12:ZFHX3:NTN1:ADNP:CUX1:KLF10	http://www.broadinstitute.org/gsea/msigdb/cards/GO_POSITIVE_REGULATION_OF_CELL_DIFFERENTIATION
GO_bp	GO_CELLULAR_RESPONSE_TO_ENDOGENOUS_STIMULUS	1006	11	2.46659e-05	0.0047573	SKI:BAMBI:SORBS1:HIF1A:BLM:GSK3A:MAPK1:PPARA:ADCY5:ACSL1:KLF10	http://www.broadinstitute.org/gsea/msigdb/cards/GO_CELLULAR_RESPONSE_TO_ENDOGENOUS_STIMULUS
GO_cc	GO_TRANSFERASE_COMPLEX_TRANSFERRING_PHOSPHORUS_CONTAINING_GROUPS	236	6	2.11025e-05	0.00611972	CCNL2:CDC73:SORBS1:POLR3E:REV3L:PUF60	http://www.broadinstitute.org/gsea/msigdb/cards/GO_TRANSFERASE_COMPLEX_TRANSFERRING_PHOSPHORUS_CONTAINING_GROUPS
GO_bp	GO_CELLULAR_RESPONSE_TO_PEPTIDE	273	6	4.75932e-05	0.00862659	SORBS1:HIF1A:GSK3A:MAPK1:ADCY5:KLF10	http://www.broadinstitute.org/gsea/msigdb/cards/GO_CELLULAR_RESPONSE_TO_PEPTIDE
GO_bp	GO_RESPONSE_TO_PEPTIDE	403	7	4.8617e-05	0.00862659	SORBS1:HIF1A:GSK3A:MAPK1:PPARA:ADCY5:KLF10	http://www.broadinstitute.org/gsea/msigdb/cards/GO_RESPONSE_TO_PEPTIDE
GO_mf	GO_ENZYME_BINDING	1735	15	1.21172e-05	0.00915877	CCNL2:SKI:RCC2:CDC73:HIF1A:ZFHX3:ZBTB4:LLGL2:ELAVL1:GSK3A:MAPK1:PPARA:ADCY5:MSH3:HEY2	http://www.broadinstitute.org/gsea/msigdb/cards/GO_ENZYME_BINDING
GO_mf	GO_TRANSFERASE_ACTIVITY_TRANSFERRING_PHOSPHORUS_CONTAINING_GROUPS	985	11	2.03302e-05	0.00915877	ITPKB:POLR3E:PPP4C:GSK3A:PANK2:MAPK1:PIM3:EPHB3:REV3L:CUX1:UCK1	http://www.broadinstitute.org/gsea/msigdb/cards/GO_TRANSFERASE_ACTIVITY_TRANSFERRING_PHOSPHORUS_CONTAINING_GROUPS
GO_bp	GO_REGULATION_OF_CARBOHYDRATE_METABOLIC_PROCESS	172	5	5.65163e-05	0.00927355	SORBS1:HIF1A:GSK3A:ADNP:PPARA	http://www.broadinstitute.org/gsea/msigdb/cards/GO_REGULATION_OF_CARBOHYDRATE_METABOLIC_PROCESS
GO_bp	GO_POSITIVE_REGULATION_OF_CELL_COMMUNICATION	1527	13	5.80948e-05	0.00927355	SKI:PUM1:CDC73:ITPKB:BAMBI:SORBS1:SH2B3:HIF1A:CHSY1:VAPA:GSK3A:MAPK1:CXXC5	http://www.broadinstitute.org/gsea/msigdb/cards/GO_POSITIVE_REGULATION_OF_CELL_COMMUNICATION
GO_bp	GO_CELL_CYCLE	1316	12	6.0157e-05	0.00927355	RCC2:CDC73:BLM:ZFHX3:GPS2:LLGL2:ANAPC11:PARD3B:MAPK1:PIM3:JMY:MSH3	http://www.broadinstitute.org/gsea/msigdb/cards/GO_CELL_CYCLE
GO_bp	GO_REGULATION_OF_GENERATION_OF_PRECURSOR_METABOLITES_AND_ENERGY	89	4	6.06251e-05	0.00927355	SORBS1:HIF1A:GSK3A:PPARA	http://www.broadinstitute.org/gsea/msigdb/cards/GO_REGULATION_OF_GENERATION_OF_PRECURSOR_METABOLITES_AND_ENERGY
GO_bp	GO_REGULATION_OF_NERVOUS_SYSTEM_DEVELOPMENT	749	9	6.97238e-05	0.0102414	SKI:HIF1A:TCF12:ZFHX3:NTN1:ADNP:EPHB3:HEY2:CUX1	http://www.broadinstitute.org/gsea/msigdb/cards/GO_REGULATION_OF_NERVOUS_SYSTEM_DEVELOPMENT
GO_bp	GO_IMMUNE_SYSTEM_DEVELOPMENT	582	8	7.15698e-05	0.0102414	ITPKB:SH2B3:HIF1A:ZBTB1:CBFB:MAPK1:EPHB3:MSH3	http://www.broadinstitute.org/gsea/msigdb/cards/GO_IMMUNE_SYSTEM_DEVELOPMENT
GO_bp	GO_REGULATION_OF_NUCLEOTIDE_CATABOLIC_PROCESS	36	3	8.57458e-05	0.0118865	HIF1A:GSK3A:PPARA	http://www.broadinstitute.org/gsea/msigdb/cards/GO_REGULATION_OF_NUCLEOTIDE_CATABOLIC_PROCESS
GO_bp	GO_RESPONSE_TO_OXYGEN_CONTAINING_COMPOUND	1380	12	9.44021e-05	0.0126899	CDC73:SORBS1:KCNK4:HIF1A:BLM:GSK3A:ADNP:MAPK1:PPARA:ADCY5:ACSL1:KLF10	http://www.broadinstitute.org/gsea/msigdb/cards/GO_RESPONSE_TO_OXYGEN_CONTAINING_COMPOUND
GO_bp	GO_REGULATION_OF_PHOSPHORUS_METABOLIC_PROCESS	1615	13	0.000102156	0.0133283	CCNL2:ITPKB:HIF1A:BLM:GPS2:CAMSAP3:GSK3A:PCIF1:ADNP:MAPK1:PPARA:ADCY5:ACSL1	http://www.broadinstitute.org/gsea/msigdb/cards/GO_REGULATION_OF_PHOSPHORUS_METABOLIC_PROCESS
GO_bp	GO_CELLULAR_RESPONSE_TO_OXYGEN_CONTAINING_COMPOUND	798	9	0.000112685	0.0142821	CDC73:SORBS1:KCNK4:HIF1A:BLM:GSK3A:MAPK1:ADCY5:KLF10	http://www.broadinstitute.org/gsea/msigdb/cards/GO_CELLULAR_RESPONSE_TO_OXYGEN_CONTAINING_COMPOUND
GO_bp	GO_REGULATION_OF_CARBOHYDRATE_CATABOLIC_PROCESS	42	3	0.000136464	0.0165198	HIF1A:GSK3A:PPARA	http://www.broadinstitute.org/gsea/msigdb/cards/GO_REGULATION_OF_CARBOHYDRATE_CATABOLIC_PROCESS
GO_bp	GO_ESTABLISHMENT_OF_LOCALIZATION_IN_CELL	1672	13	0.000144165	0.0165198	HIF1A:NTN1:RASD1:LLGL2:SLC25A10:SLC25A10:VAPA:RNF126:RPS15:GSK3A:NAPA:MAPK1:CLTB:CUX1	http://www.broadinstitute.org/gsea/msigdb/cards/GO_ESTABLISHMENT_OF_LOCALIZATION_IN_CELL
GO_bp	GO_RESPONSE_TO_ENDOGENOUS_STIMULUS	1447	12	0.000147134	0.0165198	SKI:BAMBI:SORBS1:HIF1A:BLM:ZFHX3:GSK3A:MAPK1:PPARA:ADCY5:ACSL1:KLF10	http://www.broadinstitute.org/gsea/msigdb/cards/GO_RESPONSE_TO_ENDOGENOUS_STIMULUS
GO_bp	GO_REGULATION_OF_NUCLEOTIDE_METABOLIC_PROCESS	211	5	0.000147742	0.0165198	HIF1A:GSK3A:ADNP:PPARA:ADCY5	http://www.broadinstitute.org/gsea/msigdb/cards/GO_REGULATION_OF_NUCLEOTIDE_METABOLIC_PROCESS
GO_bp	GO_REGULATION_OF_CELL_MORPHOGENESIS_INVOLVED_IN_DIFFERENTIATION	337	6	0.000150988	0.0165198	RCC2:BAMBI:NTN1:ADNP:EPHB3:CUX1	http://www.broadinstitute.org/gsea/msigdb/cards/GO_REGULATION_OF_CELL_MORPHOGENESIS_INVOLVED_IN_DIFFERENTIATION
GO_bp	GO_POSITIVE_REGULATION_OF_RESPONSE_TO_STIMULUS	1920	14	0.000152685	0.0165198	SKI:PUM1:CDC73:ITPKB:BAMBI:SORBS1:SH2B3:HIF1A:ZBTB1:CHSY1:VAPA:GSK3A:MAPK1:CXXC5	http://www.broadinstitute.org/gsea/msigdb/cards/GO_POSITIVE_REGULATION_OF_RESPONSE_TO_STIMULUS
GO_mf	GO_TRANSCRIPTION_FACTOR_ACTIVITY_PROTEIN_BINDING	586	8	7.50539e-05	0.0168649	SKI:HIF1A:CBFB:GPS2:PPARA:JMY:HEY2:SP4	http://www.broadinstitute.org/gsea/msigdb/cards/GO_TRANSCRIPTION_FACTOR_ACTIVITY_PROTEIN_BINDING
GO_mf	GO_DOUBLE_STRANDED_DNA_BINDING	761	9	7.86903e-05	0.0168649	TCF12:ZFHX3:ZBTB4:DBP:PPARA:MSH3:HEY2:CUX1:KLF10	http://www.broadinstitute.org/gsea/msigdb/cards/GO_DOUBLE_STRANDED_DNA_BINDING
GO_mf	GO_KINASE_BINDING	605	8	9.35901e-05	0.0168649	CCNL2:SKI:RCC2:HIF1A:ZBTB4:ELAVL1:GSK3A:MAPK1	http://www.broadinstitute.org/gsea/msigdb/cards/GO_KINASE_BINDING
GO_mf	GO_RNA_POLYMERASE_II_TRANSCRIPTION_FACTOR_ACTIVITY_SEQUENCE_SPECIFIC_DNA_BINDING	628	8	0.000120962	0.0181644	HIF1A:TCF12:ZFHX3:ZBTB4:DBP:PPARA:HEY2:SP4	http://www.broadinstitute.org/gsea/msigdb/cards/GO_RNA_POLYMERASE_II_TRANSCRIPTION_FACTOR_ACTIVITY_SEQUENCE_SPECIFIC_DNA_BINDING
GO_mf	GO_SEQUENCE_SPECIFIC_DNA_BINDING	1029	10	0.000156028	0.018798	HIF1A:TCF12:ZFHX3:ZBTB4:DBP:PPARA:CXXC5:HEY2:CUX1:KLF10	http://www.broadinstitute.org/gsea/msigdb/cards/GO_SEQUENCE_SPECIFIC_DNA_BINDING
GO_mf	GO_KINASE_ACTIVITY	841	9	0.000166908	0.018798	ITPKB:PPP4C:GSK3A:PANK2:MAPK1:PIM3:EPHB3:CUX1:UCK1	http://www.broadinstitute.org/gsea/msigdb/cards/GO_KINASE_ACTIVITY
GO_bp	GO_THYMUS_DEVELOPMENT	47	3	0.000191115	0.0200428	ZBTB1:MAPK1:EPHB3	http://www.broadinstitute.org/gsea/msigdb/cards/GO_THYMUS_DEVELOPMENT
GO_bp	GO_CELLULAR_RESPONSE_TO_NITROGEN_COMPOUND	504	7	0.000194283	0.0200428	SORBS1:HIF1A:BLM:GSK3A:MAPK1:ADCY5:KLF10	http://www.broadinstitute.org/gsea/msigdb/cards/GO_CELLULAR_RESPONSE_TO_NITROGEN_COMPOUND
GO_cc	GO_NUCLEAR_BODY	348	6	0.000179608	0.0211311	CCNL2:SKI:HIF1A:ZBTB1:BLM:ZFHX3	http://www.broadinstitute.org/gsea/msigdb/cards/GO_NUCLEAR_BODY
GO_cc	GO_CYTOSKELETON	1965	14	0.00019415	0.0211311	SKI:RCC2:SORBS1:TBCEL:RASSF3:PPP4C:LLGL2:VAPA:CAMSAP3:PCIF1:MAPK1:JMY:SP4:LRRC26	http://www.broadinstitute.org/gsea/msigdb/cards/GO_CYTOSKELETON
GO_cc	GO_MICROTUBULE_CYTOSKELETON	1068	10	0.000210472	0.0211311	SKI:RCC2:SORBS1:RASSF3:PPP4C:VAPA:CAMSAP3:PCIF1:MAPK1:SP4	http://www.broadinstitute.org/gsea/msigdb/cards/GO_MICROTUBULE_CYTOSKELETON
GO_cc	GO_APICAL_JUNCTION_COMPLEX	128	4	0.00024702	0.0211311	SORBS1:VAPA:CAMSAP3:PARD3B	http://www.broadinstitute.org/gsea/msigdb/cards/GO_APICAL_JUNCTION_COMPLEX
GO_cc	GO_TRANSFERASE_COMPLEX	701	8	0.00025503	0.0211311	CCNL2:CDC73:SORBS1:POLR3E:SENP3:ANAPC11:REV3L:PUF60	http://www.broadinstitute.org/gsea/msigdb/cards/GO_TRANSFERASE_COMPLEX
GO_bp	GO_POSITIVE_REGULATION_OF_CATALYTIC_ACTIVITY	1515	12	0.000224785	0.0226625	CCNL2:RCC2:SYDE2:HIF1A:LLGL2:ANAPC11:GSK3A:ADNP:MAPK1:ADCY5:ACSL1:MSH3	http://www.broadinstitute.org/gsea/msigdb/cards/GO_POSITIVE_REGULATION_OF_CATALYTIC_ACTIVITY
GO_bp	GO_REGULATION_OF_INSULIN_SECRETION_INVOLVED_IN_CELLULAR_RESPONSE_TO_GLUCOSE_STIMULUS	51	3	0.000243785	0.0240318	HIF1A:PIM3:ADCY5	http://www.broadinstitute.org/gsea/msigdb/cards/GO_REGULATION_OF_INSULIN_SECRETION_INVOLVED_IN_CELLULAR_RESPONSE_TO_GLUCOSE_STIMULUS
GO_mf	GO_TRANSCRIPTION_FACTOR_BINDING	522	7	0.000240434	0.0240701	SKI:HIF1A:TCF12:MAPK1:PPARA:CXXC5:HEY2	http://www.broadinstitute.org/gsea/msigdb/cards/GO_TRANSCRIPTION_FACTOR_BINDING
GO_bp	GO_MAMMARY_GLAND_EPITHELIUM_DEVELOPMENT	53	3	0.000273302	0.0263558	HIF1A:NTN1:MAPK1	http://www.broadinstitute.org/gsea/msigdb/cards/GO_MAMMARY_GLAND_EPITHELIUM_DEVELOPMENT
GO_bp	GO_POSITIVE_REGULATION_OF_NUCLEOTIDE_METABOLIC_PROCESS	133	4	0.000285888	0.026983	HIF1A:GSK3A:ADNP:ADCY5	http://www.broadinstitute.org/gsea/msigdb/cards/GO_POSITIVE_REGULATION_OF_NUCLEOTIDE_METABOLIC_PROCESS
GO_bp	GO_CELLULAR_RESPONSE_TO_DNA_DAMAGE_STIMULUS	717	8	0.000296626	0.0273123	MACROD1:ZBTB1:BLM:ZBTB4:MAPK1:JMY:MSH3:REV3L	http://www.broadinstitute.org/gsea/msigdb/cards/GO_CELLULAR_RESPONSE_TO_DNA_DAMAGE_STIMULUS
GO_bp	GO_NEGATIVE_REGULATION_OF_MUSCLE_CELL_DIFFERENTIATION	55	3	0.000305034	0.0273123	ZFHX3:GSK3A:HEY2	http://www.broadinstitute.org/gsea/msigdb/cards/GO_NEGATIVE_REGULATION_OF_MUSCLE_CELL_DIFFERENTIATION
GO_bp	GO_TRANSCRIPTION_FROM_RNA_POLYMERASE_II_PROMOTER	721	8	0.000307848	0.0273123	CDC73:HIF1A:ZBTB1:TCF12:CBFB:ZFHX3:DBP:PPARA	http://www.broadinstitute.org/gsea/msigdb/cards/GO_TRANSCRIPTION_FROM_RNA_POLYMERASE_II_PROMOTER
GO_bp	GO_CIRCADIAN_RHYTHM	137	4	0.000319999	0.0278336	ZFHX3:DBP:PPARA:KLF10	http://www.broadinstitute.org/gsea/msigdb/cards/GO_CIRCADIAN_RHYTHM
GO_bp	GO_CELLULAR_RESPONSE_TO_HORMONE_STIMULUS	551	7	0.00033307	0.0283759	SORBS1:HIF1A:GSK3A:MAPK1:PPARA:ADCY5:ACSL1	http://www.broadinstitute.org/gsea/msigdb/cards/GO_CELLULAR_RESPONSE_TO_HORMONE_STIMULUS
GO_bp	GO_REGULATION_OF_NEURON_DIFFERENTIATION	553	7	0.000340387	0.0283759	TCF12:ZFHX3:NTN1:ADNP:EPHB3:HEY2:CUX1	http://www.broadinstitute.org/gsea/msigdb/cards/GO_REGULATION_OF_NEURON_DIFFERENTIATION
GO_bp	GO_GLAND_DEVELOPMENT	395	6	0.000353632	0.0283759	HIF1A:ZBTB1:NTN1:DBP:MAPK1:EPHB3	http://www.broadinstitute.org/gsea/msigdb/cards/GO_GLAND_DEVELOPMENT
GO_bp	GO_REGULATION_OF_DNA_RECOMBINATION	58	3	0.000356937	0.0283759	BLM:PPP4C:MSH3	http://www.broadinstitute.org/gsea/msigdb/cards/GO_REGULATION_OF_DNA_RECOMBINATION
GO_bp	GO_CARDIAC_LEFT_VENTRICLE_MORPHOGENESIS	12	2	0.000358217	0.0283759	GSK3A:HEY2	http://www.broadinstitute.org/gsea/msigdb/cards/GO_CARDIAC_LEFT_VENTRICLE_MORPHOGENESIS
GO_bp	GO_RESPONSE_TO_TRANSFORMING_GROWTH_FACTOR_BETA	143	4	0.0003765	0.029301	SKI:BAMBI:ZFHX3:KLF10	http://www.broadinstitute.org/gsea/msigdb/cards/GO_RESPONSE_TO_TRANSFORMING_GROWTH_FACTOR_BETA
GO_bp	GO_REGULATION_OF_TRANSFERASE_ACTIVITY	944	9	0.000389927	0.0298227	CCNL2:BLM:GPS2:ANAPC11:GSK3A:ADNP:MAPK1:ADCY5:ACSL1	http://www.broadinstitute.org/gsea/msigdb/cards/GO_REGULATION_OF_TRANSFERASE_ACTIVITY
GO_bp	GO_CARDIAC_VENTRICLE_MORPHOGENESIS	62	3	0.00043453	0.0326708	HIF1A:GSK3A:HEY2	http://www.broadinstitute.org/gsea/msigdb/cards/GO_CARDIAC_VENTRICLE_MORPHOGENESIS
GO_mf	GO_PROTEIN_COMPLEX_BINDING	935	9	0.000363761	0.0327749	RCC2:CDC73:SORBS1:HIF1A:PPP4C:VAPA:CAMSAP3:FCHO1:PPARA	http://www.broadinstitute.org/gsea/msigdb/cards/GO_PROTEIN_COMPLEX_BINDING
GO_bp	GO_REGULATION_OF_INTRACELLULAR_SIGNAL_TRANSDUCTION	1651	12	0.000488554	0.0352298	PUM1:SYDE2:ITPKB:HIF1A:BLM:GPS2:VAPA:GSK3A:MAPK1:AGPAT9:JMY:CXXC5	http://www.broadinstitute.org/gsea/msigdb/cards/GO_REGULATION_OF_INTRACELLULAR_SIGNAL_TRANSDUCTION
GO_bp	GO_NEGATIVE_REGULATION_OF_CELL_COMMUNICATION	1189	10	0.000490961	0.0352298	SKI:BAMBI:HIF1A:CHAC1:GPS2:RNF126:GSK3A:ADNP:PIM3:HEY2	http://www.broadinstitute.org/gsea/msigdb/cards/GO_NEGATIVE_REGULATION_OF_CELL_COMMUNICATION
GO_bp	GO_NEGATIVE_REGULATION_OF_NUCLEOTIDE_CATABOLIC_PROCESS	14	2	0.000492391	0.0352298	GSK3A:PPARA	http://www.broadinstitute.org/gsea/msigdb/cards/GO_NEGATIVE_REGULATION_OF_NUCLEOTIDE_CATABOLIC_PROCESS
GO_bp	GO_CELL_DEVELOPMENT	1425	11	0.000520099	0.0366216	SKI:HIF1A:CHSY1:CBFB:NTN1:VAPA:CAMSAP3:PANK2:MAPK1:EPHB3:HEY2	http://www.broadinstitute.org/gsea/msigdb/cards/GO_CELL_DEVELOPMENT
GO_bp	GO_REGULATION_OF_NOTCH_SIGNALING_PATHWAY	67	3	0.000545744	0.0371389	CHAC1:LLGL2:HEY2	http://www.broadinstitute.org/gsea/msigdb/cards/GO_REGULATION_OF_NOTCH_SIGNALING_PATHWAY
GO_bp	GO_MRNA_TRANSCRIPTION_FROM_RNA_POLYMERASE_II_PROMOTER	15	2	0.000567272	0.0371389	HIF1A:ZBTB1	http://www.broadinstitute.org/gsea/msigdb/cards/GO_MRNA_TRANSCRIPTION_FROM_RNA_POLYMERASE_II_PROMOTER
GO_bp	GO_REGULATION_OF_BINDING	283	5	0.000568683	0.0371389	SKI:BAMBI:ADNP:PPARA:HEY2	http://www.broadinstitute.org/gsea/msigdb/cards/GO_REGULATION_OF_BINDING
GO_bp	GO_NEGATIVE_REGULATION_OF_OSSIFICATION	68	3	0.000569963	0.0371389	SKI:HIF1A:CHSY1	http://www.broadinstitute.org/gsea/msigdb/cards/GO_NEGATIVE_REGULATION_OF_OSSIFICATION
GO_bp	GO_REGULATION_OF_TOR_SIGNALING	68	3	0.000569963	0.0371389	HIF1A:GSK3A:AGPAT9	http://www.broadinstitute.org/gsea/msigdb/cards/GO_REGULATION_OF_TOR_SIGNALING
GO_bp	GO_POSITIVE_REGULATION_OF_NERVOUS_SYSTEM_DEVELOPMENT	436	6	0.000594596	0.0371389	HIF1A:TCF12:NTN1:ADNP:EPHB3:CUX1	http://www.broadinstitute.org/gsea/msigdb/cards/GO_POSITIVE_REGULATION_OF_NERVOUS_SYSTEM_DEVELOPMENT
GO_bp	GO_POSITIVE_REGULATION_OF_HEMOPOIESIS	162	4	0.000602442	0.0371389	ITPKB:HIF1A:ZBTB1:KLF10	http://www.broadinstitute.org/gsea/msigdb/cards/GO_POSITIVE_REGULATION_OF_HEMOPOIESIS
GO_bp	GO_POSITIVE_REGULATION_OF_CELL_MORPHOGENESIS_INVOLVED_IN_DIFFERENTIATION	162	4	0.000602442	0.0371389	BAMBI:NTN1:ADNP:CUX1	http://www.broadinstitute.org/gsea/msigdb/cards/GO_POSITIVE_REGULATION_OF_CELL_MORPHOGENESIS_INVOLVED_IN_DIFFERENTIATION
GO_bp	GO_POSITIVE_REGULATION_OF_TRANSCRIPTION_FROM_RNA_POLYMERASE_II_PROMOTER	1003	9	0.000602796	0.0371389	CCNL2:SKI:CDC73:HIF1A:TCF12:CBFB:DBP:PPARA:HEY2	http://www.broadinstitute.org/gsea/msigdb/cards/GO_POSITIVE_REGULATION_OF_TRANSCRIPTION_FROM_RNA_POLYMERASE_II_PROMOTER
GO_bp	GO_POSITIVE_REGULATION_OF_TRANSFERASE_ACTIVITY	614	7	0.000633564	0.0384999	CCNL2:ANAPC11:GSK3A:ADNP:MAPK1:ADCY5:ACSL1	http://www.broadinstitute.org/gsea/msigdb/cards/GO_POSITIVE_REGULATION_OF_TRANSFERASE_ACTIVITY
GO_bp	GO_NEGATIVE_REGULATION_OF_DNA_RECOMBINATION	16	2	0.000647317	0.0386085	BLM:MSH3	http://www.broadinstitute.org/gsea/msigdb/cards/GO_NEGATIVE_REGULATION_OF_DNA_RECOMBINATION
GO_bp	GO_REGULATION_OF_PROTEIN_MODIFICATION_PROCESS	1706	12	0.000652759	0.0386085	CCNL2:SKI:ITPKB:BLM:GPS2:ANAPC11:CAMSAP3:PCIF1:ADNP:MAPK1:ADCY5:ACSL1	http://www.broadinstitute.org/gsea/msigdb/cards/GO_REGULATION_OF_PROTEIN_MODIFICATION_PROCESS
GO_bp	GO_ORGANONITROGEN_COMPOUND_BIOSYNTHETIC_PROCESS	1020	9	0.000679326	0.0396512	DEGS1:CHAC1:CHSY1:SLC25A10:SLC25A10:VAPA:RPS15:PANK2:ADCY5:UCK1	http://www.broadinstitute.org/gsea/msigdb/cards/GO_ORGANONITROGEN_COMPOUND_BIOSYNTHETIC_PROCESS
GO_bp	GO_PHOSPHATE_CONTAINING_COMPOUND_METABOLIC_PROCESS	1973	13	0.000704908	0.0401157	ITPKB:PPP4C:GPS2:GPX4:GSK3A:PANK2:MAPK1:PIM3:ADCY5:EPHB3:AGPAT9:CUX1:UCK1	http://www.broadinstitute.org/gsea/msigdb/cards/GO_PHOSPHATE_CONTAINING_COMPOUND_METABOLIC_PROCESS
GO_bp	GO_RHYTHMIC_PROCESS	298	5	0.000717544	0.0401157	ZFHX3:DBP:ADNP:PPARA:KLF10	http://www.broadinstitute.org/gsea/msigdb/cards/GO_RHYTHMIC_PROCESS
GO_bp	GO_DNA_SYNTHESIS_INVOLVED_IN_DNA_REPAIR	74	3	0.000729762	0.0401157	ZBTB1:BLM:REV3L	http://www.broadinstitute.org/gsea/msigdb/cards/GO_DNA_SYNTHESIS_INVOLVED_IN_DNA_REPAIR
GO_bp	GO_REGULATION_OF_PRI_MIRNA_TRANSCRIPTION_FROM_RNA_POLYMERASE_II_PROMOTER	17	2	0.000732501	0.0401157	HIF1A:PPARA	http://www.broadinstitute.org/gsea/msigdb/cards/GO_REGULATION_OF_PRI_MIRNA_TRANSCRIPTION_FROM_RNA_POLYMERASE_II_PROMOTER
GO_bp	GO_NEGATIVE_REGULATION_OF_TRANSCRIPTION_REGULATORY_REGION_DNA_BINDING	17	2	0.000732501	0.0401157	PPARA:HEY2	http://www.broadinstitute.org/gsea/msigdb/cards/GO_NEGATIVE_REGULATION_OF_TRANSCRIPTION_REGULATORY_REGION_DNA_BINDING
GO_bp	GO_POSITIVE_REGULATION_OF_CARBOHYDRATE_METABOLIC_PROCESS	75	3	0.000758879	0.040588	SORBS1:HIF1A:PPARA	http://www.broadinstitute.org/gsea/msigdb/cards/GO_POSITIVE_REGULATION_OF_CARBOHYDRATE_METABOLIC_PROCESS
GO_bp	GO_CELLULAR_RESPONSE_TO_LIPID	457	6	0.000759423	0.040588	CDC73:KCNK4:HIF1A:MAPK1:PPARA:ADCY5	http://www.broadinstitute.org/gsea/msigdb/cards/GO_CELLULAR_RESPONSE_TO_LIPID
GO_mf	GO_NUCLEIC_ACID_BINDING_TRANSCRIPTION_FACTOR_ACTIVITY	1192	10	0.000500668	0.0410093	HIF1A:TCF12:CBFB:ZFHX3:ZBTB4:DBP:PPARA:HEY2:SP4:KLF10	http://www.broadinstitute.org/gsea/msigdb/cards/GO_NUCLEIC_ACID_BINDING_TRANSCRIPTION_FACTOR_ACTIVITY
GO_bp	GO_LABYRINTHINE_LAYER_BLOOD_VESSEL_DEVELOPMENT	18	2	0.000822801	0.0432507	MAPK1:HEY2	http://www.broadinstitute.org/gsea/msigdb/cards/GO_LABYRINTHINE_LAYER_BLOOD_VESSEL_DEVELOPMENT
GO_bp	GO_REGULATION_OF_CELLULAR_LOCALIZATION	1273	10	0.000829999	0.0432507	RCC2:BAMBI:SORBS1:HIF1A:LLGL2:GSK3A:NAPA:MAPK1:PIM3:ADCY5	http://www.broadinstitute.org/gsea/msigdb/cards/GO_REGULATION_OF_CELLULAR_LOCALIZATION
GO_bp	GO_ORGAN_MORPHOGENESIS	840	8	0.000838495	0.0432507	SKI:HIF1A:CHSY1:NTN1:GSK3A:MAPK1:PPARA:HEY2	http://www.broadinstitute.org/gsea/msigdb/cards/GO_ORGAN_MORPHOGENESIS
GO_bp	GO_REGULATION_OF_MITOTIC_CELL_CYCLE	468	6	0.000858803	0.0437891	RCC2:CDC73:BLM:ANAPC11:PIM3:HECA	http://www.broadinstitute.org/gsea/msigdb/cards/GO_REGULATION_OF_MITOTIC_CELL_CYCLE
GO_bp	GO_POSITIVE_REGULATION_OF_CELL_DEVELOPMENT	471	6	0.000887574	0.0445503	BAMBI:HIF1A:TCF12:NTN1:ADNP:CUX1	http://www.broadinstitute.org/gsea/msigdb/cards/GO_POSITIVE_REGULATION_OF_CELL_DEVELOPMENT
GO_bp	GO_REGULATION_OF_HEMOPOIESIS	313	5	0.000893819	0.0445503	CDC73:ITPKB:HIF1A:ZBTB1:KLF10	http://www.broadinstitute.org/gsea/msigdb/cards/GO_REGULATION_OF_HEMOPOIESIS
GO_bp	GO_PYRIMIDINE_NUCLEOBASE_METABOLIC_PROCESS	19	2	0.000918191	0.0452566	MAPK1:UCK1	http://www.broadinstitute.org/gsea/msigdb/cards/GO_PYRIMIDINE_NUCLEOBASE_METABOLIC_PROCESS
GO_bp	GO_REGULATION_OF_MYELOID_CELL_DIFFERENTIATION	182	4	0.000929905	0.0453303	CDC73:ITPKB:HIF1A:KLF10	http://www.broadinstitute.org/gsea/msigdb/cards/GO_REGULATION_OF_MYELOID_CELL_DIFFERENTIATION
GO_bp	GO_RESPONSE_TO_NITROGEN_COMPOUND	858	8	0.000960848	0.0463296	SORBS1:HIF1A:BLM:GSK3A:MAPK1:PPARA:ADCY5:KLF10	http://www.broadinstitute.org/gsea/msigdb/cards/GO_RESPONSE_TO_NITROGEN_COMPOUND
GO_bp	GO_ORGANONITROGEN_COMPOUND_METABOLIC_PROCESS	1788	12	0.000982449	0.0468618	DEGS1:MACROD1:CHAC1:CHSY1:SLC25A10:SLC25A10:VAPA:RPS15:LHB:PANK2:MAPK1:ADCY5:UCK1	http://www.broadinstitute.org/gsea/msigdb/cards/GO_ORGANONITROGEN_COMPOUND_METABOLIC_PROCESS
GO_bp	GO_NEGATIVE_REGULATION_OF_MOLECULAR_FUNCTION	1078	9	0.00100267	0.0470715	RCC2:GPS2:ANAPC11:CAMSAP3:GSK3A:PCIF1:ADNP:PPARA:HEY2	http://www.broadinstitute.org/gsea/msigdb/cards/GO_NEGATIVE_REGULATION_OF_MOLECULAR_FUNCTION
GO_bp	GO_EMBRYONIC_HEMOPOIESIS	20	2	0.00101865	0.0470715	SH2B3:HIF1A	http://www.broadinstitute.org/gsea/msigdb/cards/GO_EMBRYONIC_HEMOPOIESIS
GO_bp	GO_EMBRYONIC_PLACENTA_DEVELOPMENT	83	3	0.00101868	0.0470715	HIF1A:MAPK1:HEY2	http://www.broadinstitute.org/gsea/msigdb/cards/GO_EMBRYONIC_PLACENTA_DEVELOPMENT
GO_cc	GO_TRANSCRIPTIONAL_REPRESSOR_COMPLEX	74	3	0.000729762	0.0485462	SKI:GPS2:HEY2	http://www.broadinstitute.org/gsea/msigdb/cards/GO_TRANSCRIPTIONAL_REPRESSOR_COMPLEX
GO_cc	GO_CATALYTIC_COMPLEX	1035	9	0.000753303	0.0485462	CCNL2:CDC73:SORBS1:POLR3E:SENP3:ANAPC11:REV3L:HEY2:PUF60	http://www.broadinstitute.org/gsea/msigdb/cards/GO_CATALYTIC_COMPLEX
GO_bp	GO_STEM_CELL_DIFFERENTIATION	190	4	0.0010904	0.0489013	PUM1:HIF1A:MAPK1:HEY2	http://www.broadinstitute.org/gsea/msigdb/cards/GO_STEM_CELL_DIFFERENTIATION
GO_bp	GO_REGULATION_OF_CHROMOSOME_SEGREGATION	85	3	0.00109135	0.0489013	RCC2:PUM1:ANAPC11	http://www.broadinstitute.org/gsea/msigdb/cards/GO_REGULATION_OF_CHROMOSOME_SEGREGATION
GO_bp	GO_NEUTRAL_LIPID_METABOLIC_PROCESS	85	3	0.00109135	0.0489013	AGPAT9:ACSL1:DGAT1	http://www.broadinstitute.org/gsea/msigdb/cards/GO_NEUTRAL_LIPID_METABOLIC_PROCESS
GO_bp	GO_REGULATION_OF_RECEPTOR_BIOSYNTHETIC_PROCESS	21	2	0.00112415	0.0492992	HIF1A:PPARA	http://www.broadinstitute.org/gsea/msigdb/cards/GO_REGULATION_OF_RECEPTOR_BIOSYNTHETIC_PROCESS
GO_bp	GO_MRNA_TRANSCRIPTION	21	2	0.00112415	0.0492992	HIF1A:ZBTB1	http://www.broadinstitute.org/gsea/msigdb/cards/GO_MRNA_TRANSCRIPTION
GO_bp	GO_RESPONSE_TO_EXTERNAL_STIMULUS	1818	12	0.00113357	0.0492992	CDC73:KCNK4:HIF1A:CHSY1:POLR3E:NTN1:ADNP:MAPK1:PPARA:EPHB3:ACSL1:KLF10	http://www.broadinstitute.org/gsea/msigdb/cards/GO_RESPONSE_TO_EXTERNAL_STIMULUS
GO_bp	GO_REGULATION_OF_CARBOHYDRATE_BIOSYNTHETIC_PROCESS	87	3	0.00116722	0.0502696	SORBS1:GSK3A:PPARA	http://www.broadinstitute.org/gsea/msigdb/cards/GO_REGULATION_OF_CARBOHYDRATE_BIOSYNTHETIC_PROCESS
GO_bp	GO_ENZYME_LINKED_RECEPTOR_PROTEIN_SIGNALING_PATHWAY	688	7	0.00122693	0.0519852	SKI:BAMBI:SORBS1:GSK3A:MAPK1:EPHB3:KLF10	http://www.broadinstitute.org/gsea/msigdb/cards/GO_ENZYME_LINKED_RECEPTOR_PROTEIN_SIGNALING_PATHWAY
GO_bp	GO_MONOCARBOXYLIC_ACID_METABOLIC_PROCESS	502	6	0.00123049	0.0519852	DEGS1:HIF1A:GPX4:PANK2:PPARA:ACSL1	http://www.broadinstitute.org/gsea/msigdb/cards/GO_MONOCARBOXYLIC_ACID_METABOLIC_PROCESS
GO_bp	GO_NEGATIVE_REGULATION_OF_RESPONSE_TO_STIMULUS	1357	10	0.00134281	0.0561952	SKI:BAMBI:HIF1A:CHAC1:GPS2:RNF126:GSK3A:PPARA:PIM3:HEY2	http://www.broadinstitute.org/gsea/msigdb/cards/GO_NEGATIVE_REGULATION_OF_RESPONSE_TO_STIMULUS
GO_mf	GO_PROTEIN_HETERODIMERIZATION_ACTIVITY	464	6	0.000821568	0.0577921	HIF1A:ZBTB1:TCF12:VAPA:ADCY5:HEY2	http://www.broadinstitute.org/gsea/msigdb/cards/GO_PROTEIN_HETERODIMERIZATION_ACTIVITY
GO_mf	GO_ADENYL_NUCLEOTIDE_BINDING	1509	11	0.000833849	0.0577921	ITPKB:BLM:GSK3A:PANK2:MAPK1:PIM3:ADCY5:EPHB3:ACSL1:MSH3:UCK1	http://www.broadinstitute.org/gsea/msigdb/cards/GO_ADENYL_NUCLEOTIDE_BINDING
GO_bp	GO_BEHAVIOR	515	6	0.00140125	0.0580929	PUM1:KCNK4:HIF1A:ADNP:PPARA:ADCY5	http://www.broadinstitute.org/gsea/msigdb/cards/GO_BEHAVIOR
GO_bp	GO_REGULATION_OF_DNA_BINDING	93	3	0.00141452	0.0581002	SKI:PPARA:HEY2	http://www.broadinstitute.org/gsea/msigdb/cards/GO_REGULATION_OF_DNA_BINDING
GO_bp	GO_RESPONSE_TO_INSULIN	205	4	0.00144211	0.05869	SORBS1:HIF1A:GSK3A:PPARA	http://www.broadinstitute.org/gsea/msigdb/cards/GO_RESPONSE_TO_INSULIN
GO_bp	GO_TRANSFORMING_GROWTH_FACTOR_BETA_RECEPTOR_SIGNALING_PATHWAY	94	3	0.00145868	0.0587741	SKI:BAMBI:KLF10	http://www.broadinstitute.org/gsea/msigdb/cards/GO_TRANSFORMING_GROWTH_FACTOR_BETA_RECEPTOR_SIGNALING_PATHWAY
GO_bp	GO_CELL_SUBSTRATE_ADHERENS_JUNCTION_ASSEMBLY	24	2	0.00147068	0.0587741	RCC2:SORBS1	http://www.broadinstitute.org/gsea/msigdb/cards/GO_CELL_SUBSTRATE_ADHERENS_JUNCTION_ASSEMBLY
GO_bp	GO_POSITIVE_REGULATION_OF_CHROMOSOME_SEGREGATION	25	2	0.00159612	0.0632176	RCC2:ANAPC11	http://www.broadinstitute.org/gsea/msigdb/cards/GO_POSITIVE_REGULATION_OF_CHROMOSOME_SEGREGATION
GO_bp	GO_LIPID_METABOLIC_PROCESS	1157	9	0.00163428	0.0637224	DEGS1:PLBD2:VAPA:GPX4:LHB:PPARA:AGPAT9:ACSL1:DGAT1	http://www.broadinstitute.org/gsea/msigdb/cards/GO_LIPID_METABOLIC_PROCESS
GO_bp	GO_SULFUR_COMPOUND_METABOLIC_PROCESS	359	5	0.00163759	0.0637224	CHAC1:CHSY1:SLC25A10:SLC25A10:ACSL1:DGAT1	http://www.broadinstitute.org/gsea/msigdb/cards/GO_SULFUR_COMPOUND_METABOLIC_PROCESS
GO_bp	GO_LIPID_BIOSYNTHETIC_PROCESS	538	6	0.0017471	0.0673924	DEGS1:VAPA:LHB:AGPAT9:ACSL1:DGAT1	http://www.broadinstitute.org/gsea/msigdb/cards/GO_LIPID_BIOSYNTHETIC_PROCESS
GO_cc	GO_GOLGI_APPARATUS_PART	888	8	0.00119634	0.0678666	IL15RA:CHAC1:CHSY1:VAPA:NAPA:LHB:CLTB:CUX1	http://www.broadinstitute.org/gsea/msigdb/cards/GO_GOLGI_APPARATUS_PART
GO_cc	GO_PROTEIN_KINASE_COMPLEX	90	3	0.00128713	0.0678666	CCNL2:SORBS1:PUF60	http://www.broadinstitute.org/gsea/msigdb/cards/GO_PROTEIN_KINASE_COMPLEX
GO_bp	GO_REGULATION_OF_PROTEIN_LOCALIZATION	948	8	0.00180523	0.0690344	RCC2:BAMBI:SORBS1:HIF1A:LLGL2:GSK3A:PIM3:ADCY5	http://www.broadinstitute.org/gsea/msigdb/cards/GO_REGULATION_OF_PROTEIN_LOCALIZATION
GO_bp	GO_NEGATIVE_REGULATION_OF_FIBROBLAST_PROLIFERATION	27	2	0.00186174	0.0705871	SKI:CDC73	http://www.broadinstitute.org/gsea/msigdb/cards/GO_NEGATIVE_REGULATION_OF_FIBROBLAST_PROLIFERATION
GO_bp	GO_REGULATION_OF_CIRCADIAN_RHYTHM	103	3	0.0018954	0.0712541	ZFHX3:PPARA:KLF10	http://www.broadinstitute.org/gsea/msigdb/cards/GO_REGULATION_OF_CIRCADIAN_RHYTHM
GO_bp	GO_CARDIAC_CHAMBER_MORPHOGENESIS	104	3	0.00194839	0.0721981	HIF1A:GSK3A:HEY2	http://www.broadinstitute.org/gsea/msigdb/cards/GO_CARDIAC_CHAMBER_MORPHOGENESIS
GO_bp	GO_REGULATION_OF_CELL_MORPHOGENESIS	551	6	0.00196932	0.0721981	RCC2:BAMBI:NTN1:ADNP:EPHB3:CUX1	http://www.broadinstitute.org/gsea/msigdb/cards/GO_REGULATION_OF_CELL_MORPHOGENESIS
GO_bp	GO_TUBE_DEVELOPMENT	552	6	0.00198726	0.0721981	SKI:HIF1A:NTN1:MAPK1:EPHB3:HECA	http://www.broadinstitute.org/gsea/msigdb/cards/GO_TUBE_DEVELOPMENT
GO_bp	GO_PLACENTA_BLOOD_VESSEL_DEVELOPMENT	28	2	0.00200189	0.0721981	MAPK1:HEY2	http://www.broadinstitute.org/gsea/msigdb/cards/GO_PLACENTA_BLOOD_VESSEL_DEVELOPMENT
GO_bp	GO_NEGATIVE_REGULATION_OF_NOTCH_SIGNALING_PATHWAY	28	2	0.00200189	0.0721981	CHAC1:HEY2	http://www.broadinstitute.org/gsea/msigdb/cards/GO_NEGATIVE_REGULATION_OF_NOTCH_SIGNALING_PATHWAY
GO_bp	GO_CARDIAC_VENTRICLE_DEVELOPMENT	106	3	0.00205714	0.0730039	HIF1A:GSK3A:HEY2	http://www.broadinstitute.org/gsea/msigdb/cards/GO_CARDIAC_VENTRICLE_DEVELOPMENT
GO_bp	GO_REGULATION_OF_GLUCOSE_METABOLIC_PROCESS	106	3	0.00205714	0.0730039	SORBS1:GSK3A:PPARA	http://www.broadinstitute.org/gsea/msigdb/cards/GO_REGULATION_OF_GLUCOSE_METABOLIC_PROCESS
GO_bp	GO_NEUTRAL_LIPID_BIOSYNTHETIC_PROCESS	29	2	0.00214688	0.075584	AGPAT9:DGAT1	http://www.broadinstitute.org/gsea/msigdb/cards/GO_NEUTRAL_LIPID_BIOSYNTHETIC_PROCESS
GO_bp	GO_SINGLE_ORGANISM_BEHAVIOR	383	5	0.00216984	0.0757905	PUM1:KCNK4:HIF1A:ADNP:PPARA	http://www.broadinstitute.org/gsea/msigdb/cards/GO_SINGLE_ORGANISM_BEHAVIOR
GO_bp	GO_NEGATIVE_REGULATION_OF_MULTICELLULAR_ORGANISMAL_PROCESS	979	8	0.00220417	0.0763883	SKI:CDC73:ITPKB:HIF1A:CHSY1:NTN1:GSK3A:HEY2	http://www.broadinstitute.org/gsea/msigdb/cards/GO_NEGATIVE_REGULATION_OF_MULTICELLULAR_ORGANISMAL_PROCESS
GO_bp	GO_POSITIVE_REGULATION_OF_CYCLIC_NUCLEOTIDE_METABOLIC_PROCESS	109	3	0.00222723	0.0765891	GSK3A:ADNP:ADCY5	http://www.broadinstitute.org/gsea/msigdb/cards/GO_POSITIVE_REGULATION_OF_CYCLIC_NUCLEOTIDE_METABOLIC_PROCESS
GO_bp	GO_DOPAMINE_RECEPTOR_SIGNALING_PATHWAY	30	2	0.00229671	0.0771835	GSK3A:ADCY5	http://www.broadinstitute.org/gsea/msigdb/cards/GO_DOPAMINE_RECEPTOR_SIGNALING_PATHWAY
GO_bp	GO_RESPONSE_TO_X_RAY	30	2	0.00229671	0.0771835	HIF1A:BLM	http://www.broadinstitute.org/gsea/msigdb/cards/GO_RESPONSE_TO_X_RAY
GO_bp	GO_NEGATIVE_REGULATION_OF_TOR_SIGNALING	30	2	0.00229671	0.0771835	HIF1A:GSK3A	http://www.broadinstitute.org/gsea/msigdb/cards/GO_NEGATIVE_REGULATION_OF_TOR_SIGNALING
GO_bp	GO_POSITIVE_REGULATION_OF_ORGANELLE_ORGANIZATION	573	6	0.00239344	0.0793139	RCC2:HIF1A:ANAPC11:GSK3A:MAPK1:JMY	http://www.broadinstitute.org/gsea/msigdb/cards/GO_POSITIVE_REGULATION_OF_ORGANELLE_ORGANIZATION
GO_bp	GO_REGULATION_OF_KINASE_ACTIVITY	775	7	0.0024057	0.0793139	CCNL2:BLM:GPS2:ADNP:MAPK1:ADCY5:ACSL1	http://www.broadinstitute.org/gsea/msigdb/cards/GO_REGULATION_OF_KINASE_ACTIVITY
GO_bp	GO_REGULATION_OF_CELL_DEATH	1471	10	0.00242712	0.0793139	SKI:ITPKB:HIF1A:GSK3A:ADNP:PPARA:PIM3:FAIM:JMY:HEY2	http://www.broadinstitute.org/gsea/msigdb/cards/GO_REGULATION_OF_CELL_DEATH
GO_bp	GO_PHOSPHORYLATION	1227	9	0.00243163	0.0793139	ITPKB:GPS2:GSK3A:PANK2:MAPK1:PIM3:EPHB3:CUX1:UCK1	http://www.broadinstitute.org/gsea/msigdb/cards/GO_PHOSPHORYLATION
GO_bp	GO_CELL_DEATH	1000	8	0.00251178	0.0807301	CHAC1:NTN1:VAPA:GSK3A:MAPK1:PIM3:FAIM:PUF60	http://www.broadinstitute.org/gsea/msigdb/cards/GO_CELL_DEATH
GO_bp	GO_SENSORY_ORGAN_MORPHOGENESIS	239	4	0.00251849	0.0807301	SKI:HIF1A:NTN1:MAPK1	http://www.broadinstitute.org/gsea/msigdb/cards/GO_SENSORY_ORGAN_MORPHOGENESIS
GO_bp	GO_MEMBRANE_BUDDING	114	3	0.00252964	0.0807301	VAPA:FCHO1:NAPA	http://www.broadinstitute.org/gsea/msigdb/cards/GO_MEMBRANE_BUDDING
GO_bp	GO_DNA_BIOSYNTHETIC_PROCESS	115	3	0.00259301	0.0821614	ZBTB1:BLM:REV3L	http://www.broadinstitute.org/gsea/msigdb/cards/GO_DNA_BIOSYNTHETIC_PROCESS
GO_bp	GO_MAMMARY_GLAND_DEVELOPMENT	117	3	0.00272268	0.0856582	HIF1A:NTN1:MAPK1	http://www.broadinstitute.org/gsea/msigdb/cards/GO_MAMMARY_GLAND_DEVELOPMENT
GO_mf	GO_RIBONUCLEOTIDE_BINDING	1853	12	0.00133394	0.0856938	ITPKB:BLM:RASD1:GSK3A:PANK2:MAPK1:PIM3:ADCY5:EPHB3:ACSL1:MSH3:UCK1	http://www.broadinstitute.org/gsea/msigdb/cards/GO_RIBONUCLEOTIDE_BINDING
GO_mf	GO_DNA_SECONDARY_STRUCTURE_BINDING	24	2	0.00147068	0.0856938	BLM:MSH3	http://www.broadinstitute.org/gsea/msigdb/cards/GO_DNA_SECONDARY_STRUCTURE_BINDING
GO_mf	GO_PROTEIN_DIMERIZATION_ACTIVITY	1145	9	0.00152176	0.0856938	HIF1A:ZBTB1:TCF12:ZBTB4:VAPA:ELAVL1:ADCY5:MSH3:HEY2	http://www.broadinstitute.org/gsea/msigdb/cards/GO_PROTEIN_DIMERIZATION_ACTIVITY
GO_bp	GO_EMBRYONIC_ORGAN_DEVELOPMENT	406	5	0.00278906	0.0871286	SH2B3:HIF1A:NTN1:MAPK1:HEY2	http://www.broadinstitute.org/gsea/msigdb/cards/GO_EMBRYONIC_ORGAN_DEVELOPMENT
GO_bp	GO_REGULATION_OF_ANATOMICAL_STRUCTURE_MORPHOGENESIS	1020	8	0.00283521	0.087951	RCC2:BAMBI:HIF1A:NTN1:ADNP:EPHB3:HEY2:CUX1	http://www.broadinstitute.org/gsea/msigdb/cards/GO_REGULATION_OF_ANATOMICAL_STRUCTURE_MORPHOGENESIS
GO_mf	GO_MACROMOLECULAR_COMPLEX_BINDING	1398	10	0.00167406	0.0887251	RCC2:CDC73:SORBS1:HIF1A:PPP4C:VAPA:CAMSAP3:FCHO1:ADNP:PPARA	http://www.broadinstitute.org/gsea/msigdb/cards/GO_MACROMOLECULAR_COMPLEX_BINDING
GO_bp	GO_ADHERENS_JUNCTION_ASSEMBLY	34	2	0.0029439	0.0906884	RCC2:SORBS1	http://www.broadinstitute.org/gsea/msigdb/cards/GO_ADHERENS_JUNCTION_ASSEMBLY
GO_bp	GO_ORGANELLE_LOCALIZATION	414	5	0.00303174	0.0927505	HIF1A:NTN1:LLGL2:RPS15:NAPA	http://www.broadinstitute.org/gsea/msigdb/cards/GO_ORGANELLE_LOCALIZATION
GO_bp	GO_CELLULAR_RESPONSE_TO_CYTOKINE_STIMULUS	604	6	0.00310373	0.0928149	IL15RA:HIF1A:PPP4C:GSK3A:MAPK1:ACSL1	http://www.broadinstitute.org/gsea/msigdb/cards/GO_CELLULAR_RESPONSE_TO_CYTOKINE_STIMULUS
GO_bp	GO_CLATHRIN_MEDIATED_ENDOCYTOSIS	35	2	0.00311754	0.0928149	FCHO1:CLTB	http://www.broadinstitute.org/gsea/msigdb/cards/GO_CLATHRIN_MEDIATED_ENDOCYTOSIS
GO_bp	GO_POSITIVE_REGULATION_OF_HEART_CONTRACTION	35	2	0.00311754	0.0928149	GSK3A:HEY2	http://www.broadinstitute.org/gsea/msigdb/cards/GO_POSITIVE_REGULATION_OF_HEART_CONTRACTION
GO_bp	GO_REGULATION_OF_GLYCOGEN_METABOLIC_PROCESS	35	2	0.00311754	0.0928149	SORBS1:GSK3A	http://www.broadinstitute.org/gsea/msigdb/cards/GO_REGULATION_OF_GLYCOGEN_METABOLIC_PROCESS
GO_bp	GO_POSITIVE_REGULATION_OF_AXON_EXTENSION	36	2	0.00329588	0.0961878	NTN1:ADNP	http://www.broadinstitute.org/gsea/msigdb/cards/GO_POSITIVE_REGULATION_OF_AXON_EXTENSION
GO_bp	GO_POSITIVE_REGULATION_OF_GLUCOSE_METABOLIC_PROCESS	36	2	0.00329588	0.0961878	SORBS1:PPARA	http://www.broadinstitute.org/gsea/msigdb/cards/GO_POSITIVE_REGULATION_OF_GLUCOSE_METABOLIC_PROCESS
GO_bp	GO_REGULATION_OF_TRANSCRIPTION_REGULATORY_REGION_DNA_BINDING	36	2	0.00329588	0.0961878	PPARA:HEY2	http://www.broadinstitute.org/gsea/msigdb/cards/GO_REGULATION_OF_TRANSCRIPTION_REGULATORY_REGION_DNA_BINDING
GO_bp	GO_REGULATION_OF_TRANSPORT	1799	11	0.00333505	0.0966947	BAMBI:SORBS1:KCNK4:HIF1A:LLGL2:GSK3A:NAPA:MAPK1:PPARA:PIM3:ADCY5	http://www.broadinstitute.org/gsea/msigdb/cards/GO_REGULATION_OF_TRANSPORT
GO_mf	GO_ACYLGLYCEROL_O_ACYLTRANSFERASE_ACTIVITY	28	2	0.00200189	0.0975788	AGPAT9:DGAT1	http://www.broadinstitute.org/gsea/msigdb/cards/GO_ACYLGLYCEROL_O_ACYLTRANSFERASE_ACTIVITY
GO_mf	GO_TRANSCRIPTIONAL_ACTIVATOR_ACTIVITY_RNA_POLYMERASE_II_CORE_PROMOTER_PROXIMAL_REGION_SEQUENCE_SPECIFIC_BINDING	226	4	0.00205771	0.0975788	HIF1A:TCF12:DBP:PPARA	http://www.broadinstitute.org/gsea/msigdb/cards/GO_TRANSCRIPTIONAL_ACTIVATOR_ACTIVITY_RNA_POLYMERASE_II_CORE_PROMOTER_PROXIMAL_REGION_SEQUENCE_SPECIFIC_BINDING
GO_mf	GO_IDENTICAL_PROTEIN_BINDING	1208	9	0.0021897	0.0986461	RASSF3:ZBTB1:TCF12:ZBTB4:ELAVL1:MAPK1:MSH3:HEY2:PUF60	http://www.broadinstitute.org/gsea/msigdb/cards/GO_IDENTICAL_PROTEIN_BINDING
GO_cc	GO_GOLGI_APPARATUS	1440	10	0.00207953	0.100511	IL15RA:FBXL14:CHAC1:CHSY1:VAPA:NAPA:LHB:MAPK1:CLTB:CUX1	http://www.broadinstitute.org/gsea/msigdb/cards/GO_GOLGI_APPARATUS
GO_bp	GO_CELLULAR_RESPONSE_TO_ABIOTIC_STIMULUS	263	4	0.00354708	0.102174	KCNK4:HIF1A:ZBTB1:BLM	http://www.broadinstitute.org/gsea/msigdb/cards/GO_CELLULAR_RESPONSE_TO_ABIOTIC_STIMULUS
GO_bp	GO_CELLULAR_RESPONSE_TO_EXTERNAL_STIMULUS	264	4	0.00359527	0.102894	KCNK4:HIF1A:ADNP:KLF10	http://www.broadinstitute.org/gsea/msigdb/cards/GO_CELLULAR_RESPONSE_TO_EXTERNAL_STIMULUS
GO_bp	GO_NEGATIVE_REGULATION_OF_CELL_CYCLE	433	5	0.00366888	0.104328	CDC73:BLM:ZFHX3:JMY:HECA	http://www.broadinstitute.org/gsea/msigdb/cards/GO_NEGATIVE_REGULATION_OF_CELL_CYCLE
GO_bp	GO_POSITIVE_REGULATION_OF_LEUKOCYTE_DIFFERENTIATION	131	3	0.00374271	0.10508	ITPKB:ZBTB1:KLF10	http://www.broadinstitute.org/gsea/msigdb/cards/GO_POSITIVE_REGULATION_OF_LEUKOCYTE_DIFFERENTIATION
GO_bp	GO_NEGATIVE_REGULATION_OF_BINDING	131	3	0.00374271	0.10508	ADNP:PPARA:HEY2	http://www.broadinstitute.org/gsea/msigdb/cards/GO_NEGATIVE_REGULATION_OF_BINDING
GO_bp	GO_MAINTENANCE_OF_CELL_NUMBER	132	3	0.00382329	0.106667	SKI:CDC73:KLF10	http://www.broadinstitute.org/gsea/msigdb/cards/GO_MAINTENANCE_OF_CELL_NUMBER
GO_bp	GO_NUCLEOBASE_METABOLIC_PROCESS	39	2	0.00385885	0.106987	MAPK1:UCK1	http://www.broadinstitute.org/gsea/msigdb/cards/GO_NUCLEOBASE_METABOLIC_PROCESS
GO_bp	GO_RESPONSE_TO_EXTRACELLULAR_STIMULUS	441	5	0.00396398	0.108522	CHSY1:ADNP:PPARA:ACSL1:KLF10	http://www.broadinstitute.org/gsea/msigdb/cards/GO_RESPONSE_TO_EXTRACELLULAR_STIMULUS
GO_bp	GO_MESENCHYMAL_CELL_DIFFERENTIATION	134	3	0.00398761	0.108522	HIF1A:MAPK1:HEY2	http://www.broadinstitute.org/gsea/msigdb/cards/GO_MESENCHYMAL_CELL_DIFFERENTIATION
GO_bp	GO_PROTEIN_UBIQUITINATION_INVOLVED_IN_UBIQUITIN_DEPENDENT_PROTEIN_CATABOLIC_PROCESS	134	3	0.00398761	0.108522	FBXL14:ANAPC11:RNF126	http://www.broadinstitute.org/gsea/msigdb/cards/GO_PROTEIN_UBIQUITINATION_INVOLVED_IN_UBIQUITIN_DEPENDENT_PROTEIN_CATABOLIC_PROCESS
GO_cc	GO_CYCLIN_DEPENDENT_PROTEIN_KINASE_HOLOENZYME_COMPLEX	31	2	0.00245135	0.109368	CCNL2:PUF60	http://www.broadinstitute.org/gsea/msigdb/cards/GO_CYCLIN_DEPENDENT_PROTEIN_KINASE_HOLOENZYME_COMPLEX
GO_bp	GO_REGULATION_OF_HOMEOSTATIC_PROCESS	445	5	0.00411775	0.11138	ITPKB:HIF1A:MAPK1:PIM3:ADCY5	http://www.broadinstitute.org/gsea/msigdb/cards/GO_REGULATION_OF_HOMEOSTATIC_PROCESS
GO_bp	GO_MUSCLE_ORGAN_DEVELOPMENT	276	4	0.00420865	0.111746	SKI:TCF12:ZFHX3:HEY2	http://www.broadinstitute.org/gsea/msigdb/cards/GO_MUSCLE_ORGAN_DEVELOPMENT
GO_bp	GO_RESPONSE_TO_ALKALOID	137	3	0.00424206	0.111746	HIF1A:BLM:PPARA	http://www.broadinstitute.org/gsea/msigdb/cards/GO_RESPONSE_TO_ALKALOID
GO_bp	GO_CELLULAR_RESPONSE_TO_RADIATION	137	3	0.00424206	0.111746	HIF1A:ZBTB1:BLM	http://www.broadinstitute.org/gsea/msigdb/cards/GO_CELLULAR_RESPONSE_TO_RADIATION
GO_bp	GO_CELL_SUBSTRATE_JUNCTION_ASSEMBLY	41	2	0.00425722	0.111746	RCC2:SORBS1	http://www.broadinstitute.org/gsea/msigdb/cards/GO_CELL_SUBSTRATE_JUNCTION_ASSEMBLY
GO_bp	GO_TRANSLESION_SYNTHESIS	41	2	0.00425722	0.111746	ZBTB1:REV3L	http://www.broadinstitute.org/gsea/msigdb/cards/GO_TRANSLESION_SYNTHESIS
GO_bp	GO_PLACENTA_DEVELOPMENT	138	3	0.00432902	0.112962	HIF1A:MAPK1:HEY2	http://www.broadinstitute.org/gsea/msigdb/cards/GO_PLACENTA_DEVELOPMENT
GO_bp	GO_REGULATION_OF_MITOPHAGY	42	2	0.00446326	0.114445	HIF1A:GSK3A	http://www.broadinstitute.org/gsea/msigdb/cards/GO_REGULATION_OF_MITOPHAGY
GO_bp	GO_REGULATION_OF_HEART_GROWTH	42	2	0.00446326	0.114445	GSK3A:HEY2	http://www.broadinstitute.org/gsea/msigdb/cards/GO_REGULATION_OF_HEART_GROWTH
GO_bp	GO_NEGATIVE_REGULATION_OF_GTPASE_ACTIVITY	42	2	0.00446326	0.114445	RCC2:GPS2	http://www.broadinstitute.org/gsea/msigdb/cards/GO_NEGATIVE_REGULATION_OF_GTPASE_ACTIVITY
GO_bp	GO_PROTEIN_MODIFICATION_BY_SMALL_PROTEIN_CONJUGATION_OR_REMOVAL	871	7	0.00456313	0.115669	CDC73:FBXL14:BLM:CBFB:SENP3:ANAPC11:RNF126	http://www.broadinstitute.org/gsea/msigdb/cards/GO_PROTEIN_MODIFICATION_BY_SMALL_PROTEIN_CONJUGATION_OR_REMOVAL
GO_bp	GO_NEGATIVE_REGULATION_OF_CELL_DEATH	871	7	0.00456313	0.115669	ITPKB:HIF1A:ADNP:PPARA:PIM3:FAIM:HEY2	http://www.broadinstitute.org/gsea/msigdb/cards/GO_NEGATIVE_REGULATION_OF_CELL_DEATH
GO_bp	GO_SINGLE_ORGANISM_CELL_ADHESION	457	5	0.00460466	0.115828	ITPKB:ZBTB1:NTN1:CAMSAP3:EPHB3	http://www.broadinstitute.org/gsea/msigdb/cards/GO_SINGLE_ORGANISM_CELL_ADHESION
GO_bp	GO_NEURON_DIFFERENTIATION	874	7	0.00464844	0.115828	HIF1A:NTN1:VAPA:CAMSAP3:NAPA:MAPK1:EPHB3	http://www.broadinstitute.org/gsea/msigdb/cards/GO_NEURON_DIFFERENTIATION
GO_bp	GO_REGULATION_OF_POLYSACCHARIDE_METABOLIC_PROCESS	43	2	0.00467384	0.115828	SORBS1:GSK3A	http://www.broadinstitute.org/gsea/msigdb/cards/GO_REGULATION_OF_POLYSACCHARIDE_METABOLIC_PROCESS
GO_bp	GO_NEGATIVE_REGULATION_OF_LEUKOCYTE_APOPTOTIC_PROCESS	43	2	0.00467384	0.115828	ITPKB:HIF1A	http://www.broadinstitute.org/gsea/msigdb/cards/GO_NEGATIVE_REGULATION_OF_LEUKOCYTE_APOPTOTIC_PROCESS
GO_bp	GO_CARDIAC_CHAMBER_DEVELOPMENT	144	3	0.00487352	0.119168	HIF1A:GSK3A:HEY2	http://www.broadinstitute.org/gsea/msigdb/cards/GO_CARDIAC_CHAMBER_DEVELOPMENT
GO_bp	GO_LABYRINTHINE_LAYER_DEVELOPMENT	44	2	0.00488893	0.119168	MAPK1:HEY2	http://www.broadinstitute.org/gsea/msigdb/cards/GO_LABYRINTHINE_LAYER_DEVELOPMENT
GO_bp	GO_REGULATION_OF_DEVELOPMENTAL_GROWTH	288	4	0.00488921	0.119168	NTN1:GSK3A:ADNP:HEY2	http://www.broadinstitute.org/gsea/msigdb/cards/GO_REGULATION_OF_DEVELOPMENTAL_GROWTH
GO_bp	GO_HEART_DEVELOPMENT	466	5	0.00499583	0.121101	HIF1A:GSK3A:MAPK1:PPARA:HEY2	http://www.broadinstitute.org/gsea/msigdb/cards/GO_HEART_DEVELOPMENT
GO_bp	GO_RESPONSE_TO_LIPID	887	7	0.00503215	0.121319	CDC73:KCNK4:HIF1A:MAPK1:PPARA:ADCY5:ACSL1	http://www.broadinstitute.org/gsea/msigdb/cards/GO_RESPONSE_TO_LIPID
GO_bp	GO_CELLULAR_RESPONSE_TO_INSULIN_STIMULUS	146	3	0.00506378	0.121421	SORBS1:HIF1A:GSK3A	http://www.broadinstitute.org/gsea/msigdb/cards/GO_CELLULAR_RESPONSE_TO_INSULIN_STIMULUS
GO_bp	GO_THYMOCYTE_AGGREGATION	45	2	0.00510852	0.121634	ITPKB:ZBTB1	http://www.broadinstitute.org/gsea/msigdb/cards/GO_THYMOCYTE_AGGREGATION
GO_bp	GO_REGULATION_OF_PROTEIN_SERINE_THREONINE_KINASE_ACTIVITY	469	5	0.00513132	0.121634	CCNL2:BLM:GPS2:MAPK1:ACSL1	http://www.broadinstitute.org/gsea/msigdb/cards/GO_REGULATION_OF_PROTEIN_SERINE_THREONINE_KINASE_ACTIVITY
GO_bp	GO_RESPONSE_TO_HORMONE	891	7	0.0051549	0.121634	SORBS1:HIF1A:GSK3A:MAPK1:PPARA:ADCY5:ACSL1	http://www.broadinstitute.org/gsea/msigdb/cards/GO_RESPONSE_TO_HORMONE
GO_bp	GO_EMBRYO_DEVELOPMENT	894	7	0.00524843	0.123185	SKI:CDC73:SH2B3:HIF1A:NTN1:MAPK1:HEY2	http://www.broadinstitute.org/gsea/msigdb/cards/GO_EMBRYO_DEVELOPMENT
GO_bp	GO_FATTY_ACID_METABOLIC_PROCESS	295	4	0.00531851	0.12385	DEGS1:GPX4:PPARA:ACSL1	http://www.broadinstitute.org/gsea/msigdb/cards/GO_FATTY_ACID_METABOLIC_PROCESS
GO_bp	GO_NEGATIVE_REGULATION_OF_DNA_BINDING	46	2	0.00533257	0.12385	PPARA:HEY2	http://www.broadinstitute.org/gsea/msigdb/cards/GO_NEGATIVE_REGULATION_OF_DNA_BINDING
GO_bp	GO_RESPONSE_TO_GROWTH_FACTOR	474	5	0.00536289	0.123905	SKI:BAMBI:ZFHX3:MAPK1:KLF10	http://www.broadinstitute.org/gsea/msigdb/cards/GO_RESPONSE_TO_GROWTH_FACTOR
GO_bp	GO_MACROMOLECULAR_COMPLEX_ASSEMBLY	1388	9	0.00545017	0.124793	SKI:CDC73:ZBTB1:BLM:RPS15:FCHO1:NAPA:HEY2:DGAT1	http://www.broadinstitute.org/gsea/msigdb/cards/GO_MACROMOLECULAR_COMPLEX_ASSEMBLY
GO_bp	GO_REGULATION_OF_HORMONE_LEVELS	476	5	0.00545756	0.124793	HIF1A:LHB:PIM3:ADCY5:DGAT1	http://www.broadinstitute.org/gsea/msigdb/cards/GO_REGULATION_OF_HORMONE_LEVELS
GO_bp	GO_DNA_REPAIR	478	5	0.00555341	0.125862	ZBTB1:BLM:JMY:MSH3:REV3L	http://www.broadinstitute.org/gsea/msigdb/cards/GO_DNA_REPAIR
GO_bp	GO_INTRA_GOLGI_VESICLE_MEDIATED_TRANSPORT	47	2	0.00556108	0.125862	NAPA:CUX1	http://www.broadinstitute.org/gsea/msigdb/cards/GO_INTRA_GOLGI_VESICLE_MEDIATED_TRANSPORT
GO_bp	GO_REGULATION_OF_MUSCLE_CELL_DIFFERENTIATION	152	3	0.00566125	0.126612	ZFHX3:GSK3A:HEY2	http://www.broadinstitute.org/gsea/msigdb/cards/GO_REGULATION_OF_MUSCLE_CELL_DIFFERENTIATION
GO_bp	GO_POSITIVE_REGULATION_OF_WNT_SIGNALING_PATHWAY	152	3	0.00566125	0.126612	SKI:CDC73:BAMBI	http://www.broadinstitute.org/gsea/msigdb/cards/GO_POSITIVE_REGULATION_OF_WNT_SIGNALING_PATHWAY
GO_bp	GO_POSITIVE_REGULATION_OF_KINASE_ACTIVITY	481	5	0.00569942	0.126612	CCNL2:ADNP:MAPK1:ADCY5:ACSL1	http://www.broadinstitute.org/gsea/msigdb/cards/GO_POSITIVE_REGULATION_OF_KINASE_ACTIVITY
GO_bp	GO_NEGATIVE_REGULATION_OF_CELL_DEVELOPMENT	302	4	0.00577238	0.126612	SKI:RCC2:NTN1:GSK3A	http://www.broadinstitute.org/gsea/msigdb/cards/GO_NEGATIVE_REGULATION_OF_CELL_DEVELOPMENT
GO_bp	GO_ANTERIOR_POSTERIOR_AXIS_SPECIFICATION	48	2	0.00579402	0.126612	SKI:HEY2	http://www.broadinstitute.org/gsea/msigdb/cards/GO_ANTERIOR_POSTERIOR_AXIS_SPECIFICATION
GO_bp	GO_REGULATION_OF_CARDIAC_MUSCLE_TISSUE_DEVELOPMENT	48	2	0.00579402	0.126612	GSK3A:HEY2	http://www.broadinstitute.org/gsea/msigdb/cards/GO_REGULATION_OF_CARDIAC_MUSCLE_TISSUE_DEVELOPMENT
GO_bp	GO_DIGESTIVE_TRACT_MORPHOGENESIS	48	2	0.00579402	0.126612	HIF1A:EPHB3	http://www.broadinstitute.org/gsea/msigdb/cards/GO_DIGESTIVE_TRACT_MORPHOGENESIS
GO_bp	GO_CELLULAR_LIPID_METABOLIC_PROCESS	912	7	0.00583678	0.126921	DEGS1:VAPA:GPX4:PPARA:AGPAT9:ACSL1:DGAT1	http://www.broadinstitute.org/gsea/msigdb/cards/GO_CELLULAR_LIPID_METABOLIC_PROCESS
GO_bp	GO_POSITIVE_REGULATION_OF_NEURON_DIFFERENTIATION	305	4	0.00597456	0.128047	TCF12:NTN1:ADNP:CUX1	http://www.broadinstitute.org/gsea/msigdb/cards/GO_POSITIVE_REGULATION_OF_NEURON_DIFFERENTIATION
GO_bp	GO_REGULATION_OF_CYCLIC_NUCLEOTIDE_METABOLIC_PROCESS	155	3	0.00597516	0.128047	GSK3A:ADNP:ADCY5	http://www.broadinstitute.org/gsea/msigdb/cards/GO_REGULATION_OF_CYCLIC_NUCLEOTIDE_METABOLIC_PROCESS
GO_bp	GO_POSITIVE_REGULATION_OF_DEVELOPMENTAL_GROWTH	155	3	0.00597516	0.128047	NTN1:ADNP:HEY2	http://www.broadinstitute.org/gsea/msigdb/cards/GO_POSITIVE_REGULATION_OF_DEVELOPMENTAL_GROWTH
GO_bp	GO_REGULATION_OF_NUCLEOSIDE_METABOLIC_PROCESS	49	2	0.00603137	0.12863	HIF1A:PPARA	http://www.broadinstitute.org/gsea/msigdb/cards/GO_REGULATION_OF_NUCLEOSIDE_METABOLIC_PROCESS
GO_bp	GO_CELLULAR_RESPONSE_TO_INORGANIC_SUBSTANCE	156	3	0.00608207	0.129091	ITPKB:HIF1A:BLM	http://www.broadinstitute.org/gsea/msigdb/cards/GO_CELLULAR_RESPONSE_TO_INORGANIC_SUBSTANCE
GO_bp	GO_REGULATION_OF_COFACTOR_METABOLIC_PROCESS	50	2	0.0062731	0.131663	HIF1A:PPARA	http://www.broadinstitute.org/gsea/msigdb/cards/GO_REGULATION_OF_COFACTOR_METABOLIC_PROCESS
GO_bp	GO_FACE_DEVELOPMENT	50	2	0.0062731	0.131663	SKI:MAPK1	http://www.broadinstitute.org/gsea/msigdb/cards/GO_FACE_DEVELOPMENT
GO_bp	GO_SENSORY_ORGAN_DEVELOPMENT	493	5	0.00631065	0.131663	SKI:HIF1A:NTN1:MAPK1:HEY2	http://www.broadinstitute.org/gsea/msigdb/cards/GO_SENSORY_ORGAN_DEVELOPMENT
GO_bp	GO_REGULATION_OF_WNT_SIGNALING_PATHWAY	310	4	0.00632195	0.131663	SKI:CDC73:BAMBI:GSK3A	http://www.broadinstitute.org/gsea/msigdb/cards/GO_REGULATION_OF_WNT_SIGNALING_PATHWAY
GO_bp	GO_PROTEIN_MONOUBIQUITINATION	51	2	0.00651919	0.134508	CDC73:RNF126	http://www.broadinstitute.org/gsea/msigdb/cards/GO_PROTEIN_MONOUBIQUITINATION
GO_bp	GO_FATTY_ACYL_COA_METABOLIC_PROCESS	51	2	0.00651919	0.134508	ACSL1:DGAT1	http://www.broadinstitute.org/gsea/msigdb/cards/GO_FATTY_ACYL_COA_METABOLIC_PROCESS
GO_bp	GO_HEAD_DEVELOPMENT	706	6	0.00657481	0.135027	SKI:HIF1A:ZFHX3:NAPA:MAPK1:EPHB3	http://www.broadinstitute.org/gsea/msigdb/cards/GO_HEAD_DEVELOPMENT
GO_mf	GO_REGULATORY_REGION_NUCLEIC_ACID_BINDING	814	7	0.00315677	0.13544	TCF12:ZFHX3:ZBTB4:DBP:PPARA:CUX1:KLF10	http://www.broadinstitute.org/gsea/msigdb/cards/GO_REGULATORY_REGION_NUCLEIC_ACID_BINDING
GO_bp	GO_REGULATION_OF_ORGANELLE_ORGANIZATION	1177	8	0.00664783	0.135898	SKI:RCC2:HIF1A:ANAPC11:CAMSAP3:GSK3A:MAPK1:JMY	http://www.broadinstitute.org/gsea/msigdb/cards/GO_REGULATION_OF_ORGANELLE_ORGANIZATION
GO_bp	GO_RESPONSE_TO_CYTOKINE	711	6	0.00679698	0.138309	IL15RA:HIF1A:PPP4C:GSK3A:MAPK1:ACSL1	http://www.broadinstitute.org/gsea/msigdb/cards/GO_RESPONSE_TO_CYTOKINE
GO_bp	GO_RESPONSE_TO_TOPOLOGICALLY_INCORRECT_PROTEIN	163	3	0.00686254	0.138374	CHAC1:RNF126:GSK3A	http://www.broadinstitute.org/gsea/msigdb/cards/GO_RESPONSE_TO_TOPOLOGICALLY_INCORRECT_PROTEIN
GO_bp	GO_CELLULAR_RESPONSE_TO_BIOTIC_STIMULUS	163	3	0.00686254	0.138374	CDC73:HIF1A:MAPK1	http://www.broadinstitute.org/gsea/msigdb/cards/GO_CELLULAR_RESPONSE_TO_BIOTIC_STIMULUS
GO_bp	GO_PROTEIN_PHOSPHORYLATION	943	7	0.00696445	0.139447	ITPKB:GPS2:GSK3A:MAPK1:PIM3:EPHB3:CUX1	http://www.broadinstitute.org/gsea/msigdb/cards/GO_PROTEIN_PHOSPHORYLATION
GO_bp	GO_CELL_SUBSTRATE_ADHESION	164	3	0.00697866	0.139447	RCC2:SORBS1:EPHB3	http://www.broadinstitute.org/gsea/msigdb/cards/GO_CELL_SUBSTRATE_ADHESION
GO_bp	GO_NEGATIVE_REGULATION_OF_CARBOHYDRATE_METABOLIC_PROCESS	53	2	0.00702439	0.139732	GSK3A:PPARA	http://www.broadinstitute.org/gsea/msigdb/cards/GO_NEGATIVE_REGULATION_OF_CARBOHYDRATE_METABOLIC_PROCESS
GO_bp	GO_REGULATION_OF_CELL_CYCLE_PHASE_TRANSITION	321	4	0.00713292	0.141257	RCC2:CDC73:BLM:ANAPC11	http://www.broadinstitute.org/gsea/msigdb/cards/GO_REGULATION_OF_CELL_CYCLE_PHASE_TRANSITION
GO_bp	GO_CELLULAR_AMIDE_METABOLIC_PROCESS	721	6	0.00725764	0.142409	DEGS1:CHAC1:SLC25A10:SLC25A10:RPS15:LHB:PANK2	http://www.broadinstitute.org/gsea/msigdb/cards/GO_CELLULAR_AMIDE_METABOLIC_PROCESS
GO_bp	GO_POSTREPLICATION_REPAIR	54	2	0.00728344	0.142409	ZBTB1:REV3L	http://www.broadinstitute.org/gsea/msigdb/cards/GO_POSTREPLICATION_REPAIR
GO_bp	GO_TUBE_MORPHOGENESIS	323	4	0.00728741	0.142409	SKI:HIF1A:NTN1:EPHB3	http://www.broadinstitute.org/gsea/msigdb/cards/GO_TUBE_MORPHOGENESIS
GO_bp	GO_ORGANIC_ACID_METABOLIC_PROCESS	952	7	0.00732035	0.142426	DEGS1:HIF1A:CHSY1:GPX4:PANK2:PPARA:ACSL1	http://www.broadinstitute.org/gsea/msigdb/cards/GO_ORGANIC_ACID_METABOLIC_PROCESS
GO_bp	GO_CELL_MORPHOGENESIS_INVOLVED_IN_DIFFERENTIATION	513	5	0.00742969	0.143158	HIF1A:NTN1:MAPK1:EPHB3:HEY2	http://www.broadinstitute.org/gsea/msigdb/cards/GO_CELL_MORPHOGENESIS_INVOLVED_IN_DIFFERENTIATION
GO_bp	GO_REGULATION_OF_PROTEIN_BINDING	168	3	0.00745481	0.143158	BAMBI:ADNP:PPARA	http://www.broadinstitute.org/gsea/msigdb/cards/GO_REGULATION_OF_PROTEIN_BINDING
GO_bp	GO_REGULATION_OF_AXONOGENESIS	168	3	0.00745481	0.143158	NTN1:ADNP:EPHB3	http://www.broadinstitute.org/gsea/msigdb/cards/GO_REGULATION_OF_AXONOGENESIS
GO_bp	GO_ANATOMICAL_STRUCTURE_FORMATION_INVOLVED_IN_MORPHOGENESIS	957	7	0.00752383	0.143861	SKI:CDC73:HIF1A:MAPK1:PPARA:EPHB3:HEY2	http://www.broadinstitute.org/gsea/msigdb/cards/GO_ANATOMICAL_STRUCTURE_FORMATION_INVOLVED_IN_MORPHOGENESIS
GO_mf	GO_PROTEIN_DOMAIN_SPECIFIC_BINDING	620	6	0.00352685	0.144441	SKI:RCC2:TCF12:LLGL2:VAPA:PPARA	http://www.broadinstitute.org/gsea/msigdb/cards/GO_PROTEIN_DOMAIN_SPECIFIC_BINDING
GO_bp	GO_OUTFLOW_TRACT_MORPHOGENESIS	56	2	0.00781437	0.146449	HIF1A:HEY2	http://www.broadinstitute.org/gsea/msigdb/cards/GO_OUTFLOW_TRACT_MORPHOGENESIS
GO_bp	GO_FATTY_ACID_TRANSPORT	56	2	0.00781437	0.146449	PPARA:ACSL1	http://www.broadinstitute.org/gsea/msigdb/cards/GO_FATTY_ACID_TRANSPORT
GO_bp	GO_EPITHELIAL_TO_MESENCHYMAL_TRANSITION	56	2	0.00781437	0.146449	HIF1A:HEY2	http://www.broadinstitute.org/gsea/msigdb/cards/GO_EPITHELIAL_TO_MESENCHYMAL_TRANSITION
GO_bp	GO_NEGATIVE_REGULATION_OF_NEURON_DEATH	171	3	0.00782426	0.146449	HIF1A:ADNP:PPARA	http://www.broadinstitute.org/gsea/msigdb/cards/GO_NEGATIVE_REGULATION_OF_NEURON_DEATH
GO_bp	GO_REGULATION_OF_RESPONSE_TO_EXTRACELLULAR_STIMULUS	171	3	0.00782426	0.146449	HIF1A:GSK3A:PPARA	http://www.broadinstitute.org/gsea/msigdb/cards/GO_REGULATION_OF_RESPONSE_TO_EXTRACELLULAR_STIMULUS
GO_bp	GO_REGULATION_OF_CELL_SIZE	172	3	0.00794978	0.148173	HIF1A:NTN1:ADNP	http://www.broadinstitute.org/gsea/msigdb/cards/GO_REGULATION_OF_CELL_SIZE
GO_bp	GO_CIRCADIAN_REGULATION_OF_GENE_EXPRESSION	57	2	0.0080862	0.150085	ZFHX3:PPARA	http://www.broadinstitute.org/gsea/msigdb/cards/GO_CIRCADIAN_REGULATION_OF_GENE_EXPRESSION
GO_mf	GO_TUBULIN_BINDING	273	4	0.00404914	0.153303	RCC2:VAPA:CAMSAP3:ADNP	http://www.broadinstitute.org/gsea/msigdb/cards/GO_TUBULIN_BINDING
GO_mf	GO_PROTEIN_KINASE_ACTIVITY	639	6	0.00408356	0.153303	PPP4C:GSK3A:MAPK1:PIM3:EPHB3:CUX1	http://www.broadinstitute.org/gsea/msigdb/cards/GO_PROTEIN_KINASE_ACTIVITY
GO_bp	GO_REGULATION_OF_CELLULAR_COMPONENT_SIZE	336	4	0.00834566	0.154256	HIF1A:NTN1:ADNP:JMY	http://www.broadinstitute.org/gsea/msigdb/cards/GO_REGULATION_OF_CELLULAR_COMPONENT_SIZE
GO_bp	GO_CELLULAR_MACROMOLECULE_LOCALIZATION	1230	8	0.00856432	0.156711	RCC2:RASD1:VAPA:RPS15:NAPA:MAPK1:CLTB:HEY2	http://www.broadinstitute.org/gsea/msigdb/cards/GO_CELLULAR_MACROMOLECULE_LOCALIZATION
GO_bp	GO_REGULATION_OF_CELL_PROLIFERATION	1492	9	0.00858724	0.156711	SKI:CDC73:BAMBI:HIF1A:NTN1:RNF126:MAPK1:HEY2:KLF10	http://www.broadinstitute.org/gsea/msigdb/cards/GO_REGULATION_OF_CELL_PROLIFERATION
GO_bp	GO_REGULATION_OF_OSSIFICATION	177	3	0.00859519	0.156711	SKI:HIF1A:CHSY1	http://www.broadinstitute.org/gsea/msigdb/cards/GO_REGULATION_OF_OSSIFICATION
GO_bp	GO_REGULATION_OF_CELL_CYCLE_G2_M_PHASE_TRANSITION	59	2	0.00864249	0.156711	RCC2:BLM	http://www.broadinstitute.org/gsea/msigdb/cards/GO_REGULATION_OF_CELL_CYCLE_G2_M_PHASE_TRANSITION
GO_bp	GO_NUCLEOBASE_CONTAINING_SMALL_MOLECULE_METABOLIC_PROCESS	533	5	0.00868066	0.156711	MACROD1:PANK2:MAPK1:ADCY5:UCK1	http://www.broadinstitute.org/gsea/msigdb/cards/GO_NUCLEOBASE_CONTAINING_SMALL_MOLECULE_METABOLIC_PROCESS
GO_bp	GO_REGULATION_OF_DNA_METABOLIC_PROCESS	340	4	0.00869048	0.156711	BLM:PPP4C:MAPK1:MSH3	http://www.broadinstitute.org/gsea/msigdb/cards/GO_REGULATION_OF_DNA_METABOLIC_PROCESS
GO_bp	GO_VESICLE_MEDIATED_TRANSPORT	1235	8	0.00876454	0.157407	LLGL2:VAPA:RNF126:FCHO1:NAPA:MAPK1:CLTB:CUX1	http://www.broadinstitute.org/gsea/msigdb/cards/GO_VESICLE_MEDIATED_TRANSPORT
GO_bp	GO_REGULATION_OF_GLUCOSE_IMPORT	60	2	0.0089269	0.159676	SORBS1:GSK3A	http://www.broadinstitute.org/gsea/msigdb/cards/GO_REGULATION_OF_GLUCOSE_IMPORT
GO_bp	GO_EMBRYONIC_MORPHOGENESIS	539	5	0.00908277	0.161812	SKI:CDC73:HIF1A:NTN1:MAPK1	http://www.broadinstitute.org/gsea/msigdb/cards/GO_EMBRYONIC_MORPHOGENESIS
GO_bp	GO_TISSUE_DEVELOPMENT	1508	9	0.00917213	0.162295	SKI:CDC73:HIF1A:CHSY1:NTN1:MAPK1:PPARA:HEY2:KLF10	http://www.broadinstitute.org/gsea/msigdb/cards/GO_TISSUE_DEVELOPMENT
GO_bp	GO_POSITIVE_REGULATION_OF_SYNAPSE_ASSEMBLY	61	2	0.00921547	0.162295	ADNP:EPHB3	http://www.broadinstitute.org/gsea/msigdb/cards/GO_POSITIVE_REGULATION_OF_SYNAPSE_ASSEMBLY
GO_bp	GO_NEGATIVE_REGULATION_OF_PHOSPHORUS_METABOLIC_PROCESS	541	5	0.00921962	0.162295	GPS2:CAMSAP3:GSK3A:PCIF1:PPARA	http://www.broadinstitute.org/gsea/msigdb/cards/GO_NEGATIVE_REGULATION_OF_PHOSPHORUS_METABOLIC_PROCESS
GO_bp	GO_NEURON_PROJECTION_DEVELOPMENT	545	5	0.0094976	0.166527	NTN1:VAPA:CAMSAP3:MAPK1:EPHB3	http://www.broadinstitute.org/gsea/msigdb/cards/GO_NEURON_PROJECTION_DEVELOPMENT
GO_bp	GO_MESENCHYME_DEVELOPMENT	184	3	0.00954915	0.166772	HIF1A:MAPK1:HEY2	http://www.broadinstitute.org/gsea/msigdb/cards/GO_MESENCHYME_DEVELOPMENT
GO_bp	GO_REGULATION_OF_CELLULAR_COMPONENT_BIOGENESIS	766	6	0.00961456	0.167256	RCC2:NAPA:ADNP:EPHB3:JMY:HEY2	http://www.broadinstitute.org/gsea/msigdb/cards/GO_REGULATION_OF_CELLULAR_COMPONENT_BIOGENESIS
GO_bp	GO_CELL_JUNCTION_ORGANIZATION	185	3	0.00969027	0.167914	RCC2:SORBS1:CAMSAP3	http://www.broadinstitute.org/gsea/msigdb/cards/GO_CELL_JUNCTION_ORGANIZATION
GO_bp	GO_NEGATIVE_REGULATION_OF_NUCLEOTIDE_METABOLIC_PROCESS	63	2	0.00980497	0.169241	GSK3A:PPARA	http://www.broadinstitute.org/gsea/msigdb/cards/GO_NEGATIVE_REGULATION_OF_NUCLEOTIDE_METABOLIC_PROCESS
GO_bp	GO_NUCLEOSIDE_PHOSPHATE_BIOSYNTHETIC_PROCESS	188	3	0.0101209	0.174017	PANK2:ADCY5:UCK1	http://www.broadinstitute.org/gsea/msigdb/cards/GO_NUCLEOSIDE_PHOSPHATE_BIOSYNTHETIC_PROCESS
GO_bp	GO_TRANSMEMBRANE_RECEPTOR_PROTEIN_SERINE_THREONINE_KINASE_SIGNALING_PATHWAY	189	3	0.0102669	0.175846	SKI:BAMBI:KLF10	http://www.broadinstitute.org/gsea/msigdb/cards/GO_TRANSMEMBRANE_RECEPTOR_PROTEIN_SERINE_THREONINE_KINASE_SIGNALING_PATHWAY
GO_bp	GO_REGULATION_OF_CELL_PROJECTION_ORGANIZATION	557	5	0.0103662	0.176863	RCC2:NTN1:ADNP:EPHB3:CUX1	http://www.broadinstitute.org/gsea/msigdb/cards/GO_REGULATION_OF_CELL_PROJECTION_ORGANIZATION
GO_bp	GO_REPRODUCTION	1274	8	0.0104494	0.1776	PUM1:HIF1A:LHB:PANK2:ADNP:MAPK1:MSH3:HEY2	http://www.broadinstitute.org/gsea/msigdb/cards/GO_REPRODUCTION
GO_bp	GO_POSITIVE_REGULATION_OF_CELLULAR_PROTEIN_LOCALIZATION	360	4	0.0105546	0.178704	RCC2:BAMBI:SORBS1:GSK3A	http://www.broadinstitute.org/gsea/msigdb/cards/GO_POSITIVE_REGULATION_OF_CELLULAR_PROTEIN_LOCALIZATION
GO_bp	GO_NEGATIVE_REGULATION_OF_TRANSFORMING_GROWTH_FACTOR_BETA_RECEPTOR_SIGNALING_PATHWAY	66	2	0.0107199	0.180126	SKI:BAMBI	http://www.broadinstitute.org/gsea/msigdb/cards/GO_NEGATIVE_REGULATION_OF_TRANSFORMING_GROWTH_FACTOR_BETA_RECEPTOR_SIGNALING_PATHWAY
GO_bp	GO_SOMATIC_STEM_CELL_POPULATION_MAINTENANCE	66	2	0.0107199	0.180126	SKI:KLF10	http://www.broadinstitute.org/gsea/msigdb/cards/GO_SOMATIC_STEM_CELL_POPULATION_MAINTENANCE
GO_bp	GO_BIOLOGICAL_ADHESION	1027	7	0.0108341	0.181359	RCC2:ITPKB:SORBS1:ZBTB1:NTN1:CAMSAP3:EPHB3	http://www.broadinstitute.org/gsea/msigdb/cards/GO_BIOLOGICAL_ADHESION
GO_bp	GO_CIRCULATORY_SYSTEM_DEVELOPMENT	787	6	0.0108837	0.181504	HIF1A:GSK3A:MAPK1:PPARA:EPHB3:HEY2	http://www.broadinstitute.org/gsea/msigdb/cards/GO_CIRCULATORY_SYSTEM_DEVELOPMENT
GO_bp	GO_POSITIVE_REGULATION_OF_PHOSPHORUS_METABOLIC_PROCESS	1033	7	0.0111604	0.184866	CCNL2:HIF1A:GSK3A:ADNP:MAPK1:ADCY5:ACSL1	http://www.broadinstitute.org/gsea/msigdb/cards/GO_POSITIVE_REGULATION_OF_PHOSPHORUS_METABOLIC_PROCESS
GO_bp	GO_EAR_DEVELOPMENT	195	3	0.0111686	0.184866	NTN1:MAPK1:HEY2	http://www.broadinstitute.org/gsea/msigdb/cards/GO_EAR_DEVELOPMENT
GO_mf	GO_TRANSITION_METAL_ION_BINDING	1386	9	0.00540017	0.186443	SKI:ZFHX3:LIMD2:ANAPC11:RNF126:SH3RF3:ADNP:PPARA:CXXC5	http://www.broadinstitute.org/gsea/msigdb/cards/GO_TRANSITION_METAL_ION_BINDING
GO_mf	GO_ZINC_ION_BINDING	1141	8	0.00554581	0.186443	SKI:ZFHX3:LIMD2:ANAPC11:RNF126:SH3RF3:PPARA:CXXC5	http://www.broadinstitute.org/gsea/msigdb/cards/GO_ZINC_ION_BINDING
GO_mf	GO_O_ACYLTRANSFERASE_ACTIVITY	48	2	0.00579402	0.186443	AGPAT9:DGAT1	http://www.broadinstitute.org/gsea/msigdb/cards/GO_O_ACYLTRANSFERASE_ACTIVITY
GO_mf	GO_MRNA_3_UTR_BINDING	48	2	0.00579402	0.186443	PUM1:ELAVL1	http://www.broadinstitute.org/gsea/msigdb/cards/GO_MRNA_3_UTR_BINDING
GO_bp	GO_POSITIVE_REGULATION_OF_CELL_CYCLE_PHASE_TRANSITION	68	2	0.01135	0.187169	RCC2:ANAPC11	http://www.broadinstitute.org/gsea/msigdb/cards/GO_POSITIVE_REGULATION_OF_CELL_CYCLE_PHASE_TRANSITION
GO_cc	GO_CHROMOSOME	878	7	0.00476406	0.189039	RCC2:CDC73:TCF12:BLM:ZBTB4:MSH3:HEY2	http://www.broadinstitute.org/gsea/msigdb/cards/GO_CHROMOSOME
GO_cc	GO_INTERCELLULAR_BRIDGE	44	2	0.00488893	0.189039	PCIF1:SP4	http://www.broadinstitute.org/gsea/msigdb/cards/GO_INTERCELLULAR_BRIDGE
GO_bp	GO_INTRACELLULAR_SIGNAL_TRANSDUCTION	1568	9	0.0116395	0.191043	ITPKB:SH2B3:CHAC1:PPP4C:GPS2:NTN1:RASD1:MAPK1:ADCY5	http://www.broadinstitute.org/gsea/msigdb/cards/GO_INTRACELLULAR_SIGNAL_TRANSDUCTION
GO_bp	GO_POSITIVE_REGULATION_OF_AXONOGENESIS	69	2	0.011671	0.191043	NTN1:ADNP	http://www.broadinstitute.org/gsea/msigdb/cards/GO_POSITIVE_REGULATION_OF_AXONOGENESIS
GO_bp	GO_NEGATIVE_REGULATION_OF_MITOTIC_CELL_CYCLE	199	3	0.0117945	0.192354	CDC73:BLM:HECA	http://www.broadinstitute.org/gsea/msigdb/cards/GO_NEGATIVE_REGULATION_OF_MITOTIC_CELL_CYCLE
GO_cc	GO_TRANSCRIPTION_FACTOR_COMPLEX	296	4	0.00538183	0.195091	SKI:HIF1A:TCF12:ZFHX3	http://www.broadinstitute.org/gsea/msigdb/cards/GO_TRANSCRIPTION_FACTOR_COMPLEX
GO_bp	GO_REGULATION_OF_CELL_CELL_ADHESION	375	4	0.0121107	0.196788	ITPKB:ZBTB1:PPARA:EPHB3	http://www.broadinstitute.org/gsea/msigdb/cards/GO_REGULATION_OF_CELL_CELL_ADHESION
GO_cc	GO_CELL_JUNCTION	1149	8	0.00577762	0.197119	SORBS1:VAPA:RPS15:CAMSAP3:PARD3B:MAPK1:PRR7:PUF60	http://www.broadinstitute.org/gsea/msigdb/cards/GO_CELL_JUNCTION
GO_bp	GO_ADHERENS_JUNCTION_ORGANIZATION	71	2	0.012325	0.199539	RCC2:SORBS1	http://www.broadinstitute.org/gsea/msigdb/cards/GO_ADHERENS_JUNCTION_ORGANIZATION
GO_bp	GO_SULFUR_COMPOUND_BIOSYNTHETIC_PROCESS	203	3	0.0124401	0.20067	CHAC1:CHSY1:ACSL1	http://www.broadinstitute.org/gsea/msigdb/cards/GO_SULFUR_COMPOUND_BIOSYNTHETIC_PROCESS
GO_bp	GO_SINGLE_ORGANISM_MEMBRANE_BUDDING	72	2	0.0126579	0.203444	VAPA:NAPA	http://www.broadinstitute.org/gsea/msigdb/cards/GO_SINGLE_ORGANISM_MEMBRANE_BUDDING
GO_cc	GO_GOLGI_MEMBRANE	700	6	0.00631526	0.203492	IL15RA:CHSY1:VAPA:NAPA:CLTB:CUX1	http://www.broadinstitute.org/gsea/msigdb/cards/GO_GOLGI_MEMBRANE
GO_bp	GO_NEURON_PROJECTION_GUIDANCE	205	3	0.0127704	0.204511	NTN1:MAPK1:EPHB3	http://www.broadinstitute.org/gsea/msigdb/cards/GO_NEURON_PROJECTION_GUIDANCE
GO_cc	GO_CELL_PROJECTION_CYTOPLASM	52	2	0.00676963	0.206652	HIF1A:MAPK1	http://www.broadinstitute.org/gsea/msigdb/cards/GO_CELL_PROJECTION_CYTOPLASM
GO_bp	GO_REGULATION_OF_ORGAN_GROWTH	73	2	0.0129947	0.206753	GSK3A:HEY2	http://www.broadinstitute.org/gsea/msigdb/cards/GO_REGULATION_OF_ORGAN_GROWTH
GO_bp	GO_REGULATION_OF_HYDROLASE_ACTIVITY	1325	8	0.0130036	0.206753	RCC2:SYDE2:GPS2:LLGL2:CAMSAP3:PCIF1:EPHB3:MSH3	http://www.broadinstitute.org/gsea/msigdb/cards/GO_REGULATION_OF_HYDROLASE_ACTIVITY
GO_mf	GO_TRANSCRIPTIONAL_ACTIVATOR_ACTIVITY_RNA_POLYMERASE_II_TRANSCRIPTION_REGULATORY_REGION_SEQUENCE_SPECIFIC_BINDING	315	4	0.00668252	0.207619	HIF1A:TCF12:DBP:PPARA	http://www.broadinstitute.org/gsea/msigdb/cards/GO_TRANSCRIPTIONAL_ACTIVATOR_ACTIVITY_RNA_POLYMERASE_II_TRANSCRIPTION_REGULATORY_REGION_SEQUENCE_SPECIFIC_BINDING
GO_bp	GO_REGULATION_OF_PEPTIDE_SECRETION	207	3	0.0131057	0.207632	HIF1A:PIM3:ADCY5	http://www.broadinstitute.org/gsea/msigdb/cards/GO_REGULATION_OF_PEPTIDE_SECRETION
GO_cc	GO_CELL_CELL_ADHERENS_JUNCTION	54	2	0.00728344	0.208435	SORBS1:CAMSAP3	http://www.broadinstitute.org/gsea/msigdb/cards/GO_CELL_CELL_ADHERENS_JUNCTION
GO_cc	GO_MITOTIC_SPINDLE	55	2	0.00754678	0.208435	RCC2:MAPK1	http://www.broadinstitute.org/gsea/msigdb/cards/GO_MITOTIC_SPINDLE
GO_bp	GO_BIOMINERAL_TISSUE_DEVELOPMENT	74	2	0.0133354	0.209524	PPARA:KLF10	http://www.broadinstitute.org/gsea/msigdb/cards/GO_BIOMINERAL_TISSUE_DEVELOPMENT
GO_bp	GO_DEVELOPMENTAL_PROCESS_INVOLVED_IN_REPRODUCTION	594	5	0.0133853	0.209524	HIF1A:LHB:PANK2:MAPK1:HEY2	http://www.broadinstitute.org/gsea/msigdb/cards/GO_DEVELOPMENTAL_PROCESS_INVOLVED_IN_REPRODUCTION
GO_bp	GO_LYMPHOCYTE_DIFFERENTIATION	209	3	0.0134461	0.209524	ITPKB:ZBTB1:CBFB	http://www.broadinstitute.org/gsea/msigdb/cards/GO_LYMPHOCYTE_DIFFERENTIATION
GO_bp	GO_REGULATION_OF_PROTEIN_SECRETION	387	4	0.0134565	0.209524	HIF1A:LLGL2:PIM3:ADCY5	http://www.broadinstitute.org/gsea/msigdb/cards/GO_REGULATION_OF_PROTEIN_SECRETION
GO_bp	GO_RNA_PROCESSING	827	6	0.0136233	0.209524	PUSL1:CDC73:SENP3:RPS15:ELAVL1:PUF60	http://www.broadinstitute.org/gsea/msigdb/cards/GO_RNA_PROCESSING
GO_bp	GO_SENSORY_PERCEPTION_OF_PAIN	75	2	0.01368	0.209524	KCNK4:MAPK1	http://www.broadinstitute.org/gsea/msigdb/cards/GO_SENSORY_PERCEPTION_OF_PAIN
GO_bp	GO_VESICLE_COATING	75	2	0.01368	0.209524	FCHO1:NAPA	http://www.broadinstitute.org/gsea/msigdb/cards/GO_VESICLE_COATING
GO_bp	GO_ACTIVATION_OF_GTPASE_ACTIVITY	75	2	0.01368	0.209524	RCC2:SYDE2	http://www.broadinstitute.org/gsea/msigdb/cards/GO_ACTIVATION_OF_GTPASE_ACTIVITY
GO_bp	GO_NEURAL_CREST_CELL_DIFFERENTIATION	75	2	0.01368	0.209524	HIF1A:MAPK1	http://www.broadinstitute.org/gsea/msigdb/cards/GO_NEURAL_CREST_CELL_DIFFERENTIATION
GO_bp	GO_NEGATIVE_REGULATION_OF_CATALYTIC_ACTIVITY	828	6	0.0136975	0.209524	RCC2:GPS2:ANAPC11:CAMSAP3:GSK3A:PCIF1	http://www.broadinstitute.org/gsea/msigdb/cards/GO_NEGATIVE_REGULATION_OF_CATALYTIC_ACTIVITY
GO_cc	GO_NUCLEAR_CHROMOSOME	522	5	0.00797586	0.210273	CDC73:TCF12:BLM:MSH3:HEY2	http://www.broadinstitute.org/gsea/msigdb/cards/GO_NUCLEAR_CHROMOSOME
GO_bp	GO_HEART_MORPHOGENESIS	212	3	0.013966	0.212475	HIF1A:GSK3A:HEY2	http://www.broadinstitute.org/gsea/msigdb/cards/GO_HEART_MORPHOGENESIS
GO_bp	GO_CELL_MOTILITY	832	6	0.0139969	0.212475	SKI:BAMBI:HIF1A:NTN1:EPHB3:JMY	http://www.broadinstitute.org/gsea/msigdb/cards/GO_CELL_MOTILITY
GO_bp	GO_CELL_CYCLE_PROCESS	1081	7	0.0140341	0.212475	RCC2:BLM:ZFHX3:LLGL2:ANAPC11:JMY:MSH3	http://www.broadinstitute.org/gsea/msigdb/cards/GO_CELL_CYCLE_PROCESS
GO_bp	GO_NEGATIVE_REGULATION_OF_PROTEIN_METABOLIC_PROCESS	1085	7	0.0142954	0.214425	SKI:PUM1:CHAC1:GPS2:ANAPC11:CAMSAP3:PCIF1	http://www.broadinstitute.org/gsea/msigdb/cards/GO_NEGATIVE_REGULATION_OF_PROTEIN_METABOLIC_PROCESS
GO_bp	GO_PYRIMIDINE_CONTAINING_COMPOUND_METABOLIC_PROCESS	77	2	0.0143806	0.214425	MAPK1:UCK1	http://www.broadinstitute.org/gsea/msigdb/cards/GO_PYRIMIDINE_CONTAINING_COMPOUND_METABOLIC_PROCESS
GO_bp	GO_NEGATIVE_REGULATION_OF_DEPHOSPHORYLATION	77	2	0.0143806	0.214425	CAMSAP3:PCIF1	http://www.broadinstitute.org/gsea/msigdb/cards/GO_NEGATIVE_REGULATION_OF_DEPHOSPHORYLATION
GO_bp	GO_SPHINGOLIPID_BIOSYNTHETIC_PROCESS	77	2	0.0143806	0.214425	DEGS1:VAPA	http://www.broadinstitute.org/gsea/msigdb/cards/GO_SPHINGOLIPID_BIOSYNTHETIC_PROCESS
GO_bp	GO_POSITIVE_REGULATION_OF_CATABOLIC_PROCESS	395	4	0.0144046	0.214425	HIF1A:ANAPC11:GSK3A:PPARA	http://www.broadinstitute.org/gsea/msigdb/cards/GO_POSITIVE_REGULATION_OF_CATABOLIC_PROCESS
GO_bp	GO_NEGATIVE_REGULATION_OF_HYDROLASE_ACTIVITY	396	4	0.014526	0.215509	RCC2:GPS2:CAMSAP3:PCIF1	http://www.broadinstitute.org/gsea/msigdb/cards/GO_NEGATIVE_REGULATION_OF_HYDROLASE_ACTIVITY
GO_mf	GO_PROTEIN_HOMODIMERIZATION_ACTIVITY	722	6	0.00730492	0.219391	ZBTB1:TCF12:ZBTB4:ELAVL1:MSH3:HEY2	http://www.broadinstitute.org/gsea/msigdb/cards/GO_PROTEIN_HOMODIMERIZATION_ACTIVITY
GO_bp	GO_REPRODUCTIVE_SYSTEM_DEVELOPMENT	400	4	0.0150182	0.22029	HIF1A:LHB:MAPK1:HEY2	http://www.broadinstitute.org/gsea/msigdb/cards/GO_REPRODUCTIVE_SYSTEM_DEVELOPMENT
GO_bp	GO_NEGATIVE_REGULATION_OF_PROTEIN_BINDING	79	2	0.0150965	0.22029	ADNP:PPARA	http://www.broadinstitute.org/gsea/msigdb/cards/GO_NEGATIVE_REGULATION_OF_PROTEIN_BINDING
GO_bp	GO_BONE_MORPHOGENESIS	79	2	0.0150965	0.22029	SKI:CHSY1	http://www.broadinstitute.org/gsea/msigdb/cards/GO_BONE_MORPHOGENESIS
GO_bp	GO_REGULATION_OF_SYNAPSE_ASSEMBLY	79	2	0.0150965	0.22029	ADNP:EPHB3	http://www.broadinstitute.org/gsea/msigdb/cards/GO_REGULATION_OF_SYNAPSE_ASSEMBLY
GO_bp	GO_REGULATION_OF_LEUKOCYTE_APOPTOTIC_PROCESS	79	2	0.0150965	0.22029	ITPKB:HIF1A	http://www.broadinstitute.org/gsea/msigdb/cards/GO_REGULATION_OF_LEUKOCYTE_APOPTOTIC_PROCESS
GO_mf	GO_TRANSCRIPTION_FACTOR_ACTIVITY_RNA_POLYMERASE_II_CORE_PROMOTER_PROXIMAL_REGION_SEQUENCE_SPECIFIC_BINDING	328	4	0.00768325	0.220778	HIF1A:TCF12:DBP:PPARA	http://www.broadinstitute.org/gsea/msigdb/cards/GO_TRANSCRIPTION_FACTOR_ACTIVITY_RNA_POLYMERASE_II_CORE_PROMOTER_PROXIMAL_REGION_SEQUENCE_SPECIFIC_BINDING
GO_mf	GO_BINDING_BRIDGING	173	3	0.00807647	0.220778	SORBS1:SH2B3:CUX1	http://www.broadinstitute.org/gsea/msigdb/cards/GO_BINDING_BRIDGING
GO_mf	GO_REPRESSING_TRANSCRIPTION_FACTOR_BINDING	57	2	0.0080862	0.220778	SKI:PPARA	http://www.broadinstitute.org/gsea/msigdb/cards/GO_REPRESSING_TRANSCRIPTION_FACTOR_BINDING
GO_bp	GO_NEGATIVE_REGULATION_OF_PROTEIN_MODIFICATION_PROCESS	616	5	0.0154369	0.221945	SKI:GPS2:ANAPC11:CAMSAP3:PCIF1	http://www.broadinstitute.org/gsea/msigdb/cards/GO_NEGATIVE_REGULATION_OF_PROTEIN_MODIFICATION_PROCESS
GO_bp	GO_CELLULAR_RESPONSE_TO_MECHANICAL_STIMULUS	80	2	0.0154601	0.221945	KCNK4:HIF1A	http://www.broadinstitute.org/gsea/msigdb/cards/GO_CELLULAR_RESPONSE_TO_MECHANICAL_STIMULUS
GO_bp	GO_POSITIVE_REGULATION_OF_LYMPHOCYTE_DIFFERENTIATION	80	2	0.0154601	0.221945	ITPKB:ZBTB1	http://www.broadinstitute.org/gsea/msigdb/cards/GO_POSITIVE_REGULATION_OF_LYMPHOCYTE_DIFFERENTIATION
GO_bp	GO_INSULIN_RECEPTOR_SIGNALING_PATHWAY	80	2	0.0154601	0.221945	SORBS1:GSK3A	http://www.broadinstitute.org/gsea/msigdb/cards/GO_INSULIN_RECEPTOR_SIGNALING_PATHWAY
GO_bp	GO_POSITIVE_REGULATION_OF_MYELOID_CELL_DIFFERENTIATION	80	2	0.0154601	0.221945	HIF1A:KLF10	http://www.broadinstitute.org/gsea/msigdb/cards/GO_POSITIVE_REGULATION_OF_MYELOID_CELL_DIFFERENTIATION
GO_bp	GO_REGULATION_OF_FIBROBLAST_PROLIFERATION	81	2	0.0158275	0.226486	SKI:CDC73	http://www.broadinstitute.org/gsea/msigdb/cards/GO_REGULATION_OF_FIBROBLAST_PROLIFERATION
GO_bp	GO_REGULATION_OF_NEURON_PROJECTION_DEVELOPMENT	407	4	0.0159046	0.226858	NTN1:ADNP:EPHB3:CUX1	http://www.broadinstitute.org/gsea/msigdb/cards/GO_REGULATION_OF_NEURON_PROJECTION_DEVELOPMENT
GO_bp	GO_LOCOMOTION	1111	7	0.0160804	0.228624	SKI:BAMBI:HIF1A:NTN1:MAPK1:EPHB3:JMY	http://www.broadinstitute.org/gsea/msigdb/cards/GO_LOCOMOTION
GO_bp	GO_REGULATION_OF_CELL_ADHESION	623	5	0.0161315	0.228624	RCC2:ITPKB:ZBTB1:PPARA:EPHB3	http://www.broadinstitute.org/gsea/msigdb/cards/GO_REGULATION_OF_CELL_ADHESION
GO_bp	GO_POSITIVE_REGULATION_OF_IMMUNE_SYSTEM_PROCESS	860	6	0.0162222	0.229178	PUM1:ITPKB:HIF1A:ZBTB1:MAPK1:KLF10	http://www.broadinstitute.org/gsea/msigdb/cards/GO_POSITIVE_REGULATION_OF_IMMUNE_SYSTEM_PROCESS
GO_bp	GO_RESPONSE_TO_FATTY_ACID	83	2	0.0165734	0.232657	KCNK4:ACSL1	http://www.broadinstitute.org/gsea/msigdb/cards/GO_RESPONSE_TO_FATTY_ACID
GO_bp	GO_THIOESTER_METABOLIC_PROCESS	83	2	0.0165734	0.232657	ACSL1:DGAT1	http://www.broadinstitute.org/gsea/msigdb/cards/GO_THIOESTER_METABOLIC_PROCESS
GO_bp	GO_PROTEIN_UBIQUITINATION	628	5	0.0166403	0.232859	CDC73:FBXL14:CBFB:ANAPC11:RNF126	http://www.broadinstitute.org/gsea/msigdb/cards/GO_PROTEIN_UBIQUITINATION
GO_bp	GO_TELENCEPHALON_DEVELOPMENT	227	3	0.016736	0.233462	SKI:HIF1A:EPHB3	http://www.broadinstitute.org/gsea/msigdb/cards/GO_TELENCEPHALON_DEVELOPMENT
GO_bp	GO_REGULATION_OF_GROWTH	630	5	0.0168467	0.234017	HIF1A:NTN1:GSK3A:ADNP:HEY2	http://www.broadinstitute.org/gsea/msigdb/cards/GO_REGULATION_OF_GROWTH
GO_bp	GO_NEGATIVE_REGULATION_OF_DEVELOPMENTAL_GROWTH	84	2	0.0169519	0.234017	NTN1:GSK3A	http://www.broadinstitute.org/gsea/msigdb/cards/GO_NEGATIVE_REGULATION_OF_DEVELOPMENTAL_GROWTH
GO_bp	GO_NEGATIVE_REGULATION_OF_MYELOID_CELL_DIFFERENTIATION	84	2	0.0169519	0.234017	CDC73:ITPKB	http://www.broadinstitute.org/gsea/msigdb/cards/GO_NEGATIVE_REGULATION_OF_MYELOID_CELL_DIFFERENTIATION
GO_bp	GO_CENTRAL_NERVOUS_SYSTEM_DEVELOPMENT	869	6	0.0169868	0.234017	SKI:HIF1A:ZFHX3:NAPA:MAPK1:EPHB3	http://www.broadinstitute.org/gsea/msigdb/cards/GO_CENTRAL_NERVOUS_SYSTEM_DEVELOPMENT
GO_bp	GO_REGULATION_OF_CELLULAR_RESPONSE_TO_GROWTH_FACTOR_STIMULUS	229	3	0.0171269	0.235216	SKI:BAMBI:HIF1A	http://www.broadinstitute.org/gsea/msigdb/cards/GO_REGULATION_OF_CELLULAR_RESPONSE_TO_GROWTH_FACTOR_STIMULUS
GO_bp	GO_RECEPTOR_MEDIATED_ENDOCYTOSIS	230	3	0.0173243	0.236266	FCHO1:MAPK1:CLTB	http://www.broadinstitute.org/gsea/msigdb/cards/GO_RECEPTOR_MEDIATED_ENDOCYTOSIS
GO_bp	GO_PALATE_DEVELOPMENT	85	2	0.0173341	0.236266	SKI:EPHB3	http://www.broadinstitute.org/gsea/msigdb/cards/GO_PALATE_DEVELOPMENT
GO_bp	GO_PATTERN_SPECIFICATION_PROCESS	418	4	0.0173631	0.236266	SKI:HIF1A:CHSY1:HEY2	http://www.broadinstitute.org/gsea/msigdb/cards/GO_PATTERN_SPECIFICATION_PROCESS
GO_bp	GO_POSITIVE_REGULATION_OF_NEURON_PROJECTION_DEVELOPMENT	231	3	0.0175229	0.237711	NTN1:ADNP:CUX1	http://www.broadinstitute.org/gsea/msigdb/cards/GO_POSITIVE_REGULATION_OF_NEURON_PROJECTION_DEVELOPMENT
GO_bp	GO_IMMUNE_SYSTEM_PROCESS	1972	10	0.0176578	0.238238	ITPKB:SH2B3:HIF1A:ZBTB1:TCF12:POLR3E:CBFB:MAPK1:EPHB3:MSH3	http://www.broadinstitute.org/gsea/msigdb/cards/GO_IMMUNE_SYSTEM_PROCESS
GO_bp	GO_REGULATION_OF_LEUKOCYTE_DIFFERENTIATION	232	3	0.0177228	0.238238	ITPKB:ZBTB1:KLF10	http://www.broadinstitute.org/gsea/msigdb/cards/GO_REGULATION_OF_LEUKOCYTE_DIFFERENTIATION
GO_bp	GO_REGULATION_OF_SYNAPSE_STRUCTURE_OR_ACTIVITY	232	3	0.0177228	0.238238	ADNP:MAPK1:EPHB3	http://www.broadinstitute.org/gsea/msigdb/cards/GO_REGULATION_OF_SYNAPSE_STRUCTURE_OR_ACTIVITY
GO_bp	GO_REGULATION_OF_FATTY_ACID_METABOLIC_PROCESS	87	2	0.0181094	0.242699	PANK2:PPARA	http://www.broadinstitute.org/gsea/msigdb/cards/GO_REGULATION_OF_FATTY_ACID_METABOLIC_PROCESS
GO_bp	GO_ORGANOPHOSPHATE_METABOLIC_PROCESS	883	6	0.0182253	0.243517	ITPKB:GPX4:PANK2:ADCY5:AGPAT9:UCK1	http://www.broadinstitute.org/gsea/msigdb/cards/GO_ORGANOPHOSPHATE_METABOLIC_PROCESS
GO_bp	GO_POSITIVE_REGULATION_OF_GROWTH	235	3	0.0183302	0.244183	NTN1:ADNP:HEY2	http://www.broadinstitute.org/gsea/msigdb/cards/GO_POSITIVE_REGULATION_OF_GROWTH
GO_bp	GO_CELLULAR_RESPONSE_TO_INTERLEUKIN_1	88	2	0.0185025	0.24544	HIF1A:PPP4C	http://www.broadinstitute.org/gsea/msigdb/cards/GO_CELLULAR_RESPONSE_TO_INTERLEUKIN_1
GO_bp	GO_NEGATIVE_REGULATION_OF_GROWTH	236	3	0.0185353	0.24544	HIF1A:NTN1:GSK3A	http://www.broadinstitute.org/gsea/msigdb/cards/GO_NEGATIVE_REGULATION_OF_GROWTH
GO_bp	GO_POSITIVE_REGULATION_OF_CAMP_METABOLIC_PROCESS	89	2	0.0188992	0.249514	GSK3A:ADCY5	http://www.broadinstitute.org/gsea/msigdb/cards/GO_POSITIVE_REGULATION_OF_CAMP_METABOLIC_PROCESS
GO_bp	GO_MUSCLE_STRUCTURE_DEVELOPMENT	431	4	0.0191916	0.252623	SKI:TCF12:ZFHX3:HEY2	http://www.broadinstitute.org/gsea/msigdb/cards/GO_MUSCLE_STRUCTURE_DEVELOPMENT
GO_bp	GO_AXIS_SPECIFICATION	90	2	0.0192995	0.253013	SKI:HEY2	http://www.broadinstitute.org/gsea/msigdb/cards/GO_AXIS_SPECIFICATION
GO_bp	GO_SINGLE_ORGANISM_CELLULAR_LOCALIZATION	895	6	0.0193353	0.253013	HIF1A:LLGL2:VAPA:RPS15:NAPA:MAPK1	http://www.broadinstitute.org/gsea/msigdb/cards/GO_SINGLE_ORGANISM_CELLULAR_LOCALIZATION
GO_bp	GO_RESPONSE_TO_TOXIC_SUBSTANCE	241	3	0.0195796	0.255456	HIF1A:GPX4:MAPK1	http://www.broadinstitute.org/gsea/msigdb/cards/GO_RESPONSE_TO_TOXIC_SUBSTANCE
GO_bp	GO_CELLULAR_RESPONSE_TO_LIGHT_STIMULUS	91	2	0.0197033	0.256316	HIF1A:ZBTB1	http://www.broadinstitute.org/gsea/msigdb/cards/GO_CELLULAR_RESPONSE_TO_LIGHT_STIMULUS
GO_bp	GO_CELLULAR_COMPONENT_MORPHOGENESIS	900	6	0.0198112	0.256966	HIF1A:NTN1:PANK2:MAPK1:EPHB3:HEY2	http://www.broadinstitute.org/gsea/msigdb/cards/GO_CELLULAR_COMPONENT_MORPHOGENESIS
GO_bp	GO_PROTEIN_POLYUBIQUITINATION	243	3	0.0200063	0.25874	CBFB:ANAPC11:RNF126	http://www.broadinstitute.org/gsea/msigdb/cards/GO_PROTEIN_POLYUBIQUITINATION
GO_bp	GO_POSITIVE_REGULATION_OF_BLOOD_CIRCULATION	93	2	0.0205216	0.264633	GSK3A:HEY2	http://www.broadinstitute.org/gsea/msigdb/cards/GO_POSITIVE_REGULATION_OF_BLOOD_CIRCULATION
GO_bp	GO_NEURAL_TUBE_FORMATION	94	2	0.020936	0.269194	SKI:HIF1A	http://www.broadinstitute.org/gsea/msigdb/cards/GO_NEURAL_TUBE_FORMATION
GO_bp	GO_RESPONSE_TO_ORGANIC_CYCLIC_COMPOUND	915	6	0.0212868	0.272201	HIF1A:BLM:MAPK1:PPARA:ADCY5:ACSL1	http://www.broadinstitute.org/gsea/msigdb/cards/GO_RESPONSE_TO_ORGANIC_CYCLIC_COMPOUND
GO_bp	GO_CELL_PROLIFERATION	670	5	0.0213408	0.272201	SKI:ITPKB:IL15RA:MAPK1:KLF10	http://www.broadinstitute.org/gsea/msigdb/cards/GO_CELL_PROLIFERATION
GO_bp	GO_CARBOHYDRATE_TRANSPORT	95	2	0.0213539	0.272201	SORBS1:SLC35E1	http://www.broadinstitute.org/gsea/msigdb/cards/GO_CARBOHYDRATE_TRANSPORT
GO_bp	GO_COGNITION	250	3	0.0215401	0.273564	KCNK4:HIF1A:ADNP	http://www.broadinstitute.org/gsea/msigdb/cards/GO_COGNITION
GO_bp	GO_REGULATION_OF_GTPASE_ACTIVITY	672	5	0.0215842	0.273564	RCC2:SYDE2:GPS2:LLGL2:EPHB3	http://www.broadinstitute.org/gsea/msigdb/cards/GO_REGULATION_OF_GTPASE_ACTIVITY
GO_bp	GO_OSSIFICATION	251	3	0.0217643	0.274418	CBFB:RPS15:KLF10	http://www.broadinstitute.org/gsea/msigdb/cards/GO_OSSIFICATION
GO_bp	GO_CARDIOCYTE_DIFFERENTIATION	96	2	0.0217753	0.274418	MAPK1:HEY2	http://www.broadinstitute.org/gsea/msigdb/cards/GO_CARDIOCYTE_DIFFERENTIATION
GO_bp	GO_REGULATION_OF_NEURON_DEATH	252	3	0.0219898	0.276337	HIF1A:ADNP:PPARA	http://www.broadinstitute.org/gsea/msigdb/cards/GO_REGULATION_OF_NEURON_DEATH
GO_bp	GO_ORGANOPHOSPHATE_BIOSYNTHETIC_PROCESS	450	4	0.022072	0.276585	PANK2:ADCY5:AGPAT9:UCK1	http://www.broadinstitute.org/gsea/msigdb/cards/GO_ORGANOPHOSPHATE_BIOSYNTHETIC_PROCESS
GO_bp	GO_REGULATION_OF_CYCLIN_DEPENDENT_PROTEIN_KINASE_ACTIVITY	97	2	0.0222001	0.277407	CCNL2:BLM	http://www.broadinstitute.org/gsea/msigdb/cards/GO_REGULATION_OF_CYCLIN_DEPENDENT_PROTEIN_KINASE_ACTIVITY
GO_cc	GO_COATED_PIT	67	2	0.0110329	0.278221	FCHO1:CLTB	http://www.broadinstitute.org/gsea/msigdb/cards/GO_COATED_PIT
GO_bp	GO_REGULATION_OF_PEPTIDE_TRANSPORT	254	3	0.0224447	0.279677	HIF1A:PIM3:ADCY5	http://www.broadinstitute.org/gsea/msigdb/cards/GO_REGULATION_OF_PEPTIDE_TRANSPORT
GO_bp	GO_MEMORY	98	2	0.0226283	0.281175	KCNK4:ADNP	http://www.broadinstitute.org/gsea/msigdb/cards/GO_MEMORY
GO_bp	GO_SKELETAL_SYSTEM_DEVELOPMENT	454	4	0.0227103	0.281404	SKI:HIF1A:CHSY1:KLF10	http://www.broadinstitute.org/gsea/msigdb/cards/GO_SKELETAL_SYSTEM_DEVELOPMENT
GO_bp	GO_REGULATION_OF_CELLULAR_RESPONSE_TO_TRANSFORMING_GROWTH_FACTOR_BETA_STIMULUS	99	2	0.02306	0.284081	SKI:BAMBI	http://www.broadinstitute.org/gsea/msigdb/cards/GO_REGULATION_OF_CELLULAR_RESPONSE_TO_TRANSFORMING_GROWTH_FACTOR_BETA_STIMULUS
GO_bp	GO_DNA_DEPENDENT_DNA_REPLICATION	99	2	0.02306	0.284081	BLM:REV3L	http://www.broadinstitute.org/gsea/msigdb/cards/GO_DNA_DEPENDENT_DNA_REPLICATION
GO_bp	GO_NEURON_DEVELOPMENT	687	5	0.0234671	0.284081	NTN1:VAPA:CAMSAP3:MAPK1:EPHB3	http://www.broadinstitute.org/gsea/msigdb/cards/GO_NEURON_DEVELOPMENT
GO_bp	GO_REGULATION_OF_GLUCOSE_TRANSPORT	100	2	0.0234951	0.284081	SORBS1:GSK3A	http://www.broadinstitute.org/gsea/msigdb/cards/GO_REGULATION_OF_GLUCOSE_TRANSPORT
GO_bp	GO_CELL_DIVISION	460	4	0.0236888	0.284081	RCC2:LLGL2:ANAPC11:PARD3B	http://www.broadinstitute.org/gsea/msigdb/cards/GO_CELL_DIVISION
GO_bp	GO_REGULATION_OF_HORMONE_SECRETION	260	3	0.0238402	0.284081	HIF1A:PIM3:ADCY5	http://www.broadinstitute.org/gsea/msigdb/cards/GO_REGULATION_OF_HORMONE_SECRETION
GO_bp	GO_REGULATION_OF_CELLULAR_RESPONSE_TO_STRESS	690	5	0.0238561	0.284081	HIF1A:PPP4C:GPS2:GSK3A:MAPK1	http://www.broadinstitute.org/gsea/msigdb/cards/GO_REGULATION_OF_CELLULAR_RESPONSE_TO_STRESS
GO_bp	GO_REGULATION_OF_EXTENT_OF_CELL_GROWTH	101	2	0.0239335	0.284081	NTN1:ADNP	http://www.broadinstitute.org/gsea/msigdb/cards/GO_REGULATION_OF_EXTENT_OF_CELL_GROWTH
GO_bp	GO_CAMERA_TYPE_EYE_MORPHOGENESIS	101	2	0.0239335	0.284081	SKI:HIF1A	http://www.broadinstitute.org/gsea/msigdb/cards/GO_CAMERA_TYPE_EYE_MORPHOGENESIS
GO_bp	GO_ORGANIC_ACID_TRANSPORT	261	3	0.0240773	0.284081	SLC25A10:SLC25A10:PPARA:ACSL1	http://www.broadinstitute.org/gsea/msigdb/cards/GO_ORGANIC_ACID_TRANSPORT
GO_bp	GO_POSITIVE_REGULATION_OF_PROTEIN_METABOLIC_PROCESS	1487	8	0.0241757	0.284081	CCNL2:ANAPC11:ELAVL1:GSK3A:ADNP:MAPK1:ADCY5:ACSL1	http://www.broadinstitute.org/gsea/msigdb/cards/GO_POSITIVE_REGULATION_OF_PROTEIN_METABOLIC_PROCESS
GO_bp	GO_SYSTEM_PROCESS	1777	9	0.0242217	0.284081	SORBS1:KCNK4:HIF1A:GSK3A:ADNP:MAPK1:PPARA:ADCY5:HEY2	http://www.broadinstitute.org/gsea/msigdb/cards/GO_SYSTEM_PROCESS
GO_bp	GO_EPITHELIUM_DEVELOPMENT	943	6	0.0242384	0.284081	SKI:HIF1A:NTN1:MAPK1:PPARA:HEY2	http://www.broadinstitute.org/gsea/msigdb/cards/GO_EPITHELIUM_DEVELOPMENT
GO_bp	GO_CELLULAR_RESPONSE_TO_ORGANIC_CYCLIC_COMPOUND	464	4	0.0243551	0.284081	HIF1A:BLM:PPARA:ADCY5	http://www.broadinstitute.org/gsea/msigdb/cards/GO_CELLULAR_RESPONSE_TO_ORGANIC_CYCLIC_COMPOUND
GO_bp	GO_NEGATIVE_REGULATION_OF_TRANSMEMBRANE_RECEPTOR_PROTEIN_SERINE_THREONINE_KINASE_SIGNALING_PATHWAY	102	2	0.0243753	0.284081	SKI:BAMBI	http://www.broadinstitute.org/gsea/msigdb/cards/GO_NEGATIVE_REGULATION_OF_TRANSMEMBRANE_RECEPTOR_PROTEIN_SERINE_THREONINE_KINASE_SIGNALING_PATHWAY
GO_bp	GO_REGULATION_OF_SECRETION	695	5	0.0245137	0.284081	HIF1A:LLGL2:NAPA:PIM3:ADCY5	http://www.broadinstitute.org/gsea/msigdb/cards/GO_REGULATION_OF_SECRETION
GO_bp	GO_LIPID_LOCALIZATION	264	3	0.0247962	0.284081	PPARA:ACSL1:DGAT1	http://www.broadinstitute.org/gsea/msigdb/cards/GO_LIPID_LOCALIZATION
GO_bp	GO_REGULATION_OF_MUSCLE_TISSUE_DEVELOPMENT	103	2	0.0248205	0.284081	GSK3A:HEY2	http://www.broadinstitute.org/gsea/msigdb/cards/GO_REGULATION_OF_MUSCLE_TISSUE_DEVELOPMENT
GO_bp	GO_VASCULATURE_DEVELOPMENT	468	4	0.0250328	0.284081	HIF1A:MAPK1:EPHB3:HEY2	http://www.broadinstitute.org/gsea/msigdb/cards/GO_VASCULATURE_DEVELOPMENT
GO_bp	GO_COENZYME_METABOLIC_PROCESS	265	3	0.0250384	0.284081	PANK2:ACSL1:DGAT1	http://www.broadinstitute.org/gsea/msigdb/cards/GO_COENZYME_METABOLIC_PROCESS
GO_bp	GO_CELLULAR_HORMONE_METABOLIC_PROCESS	104	2	0.0252689	0.284081	LHB:DGAT1	http://www.broadinstitute.org/gsea/msigdb/cards/GO_CELLULAR_HORMONE_METABOLIC_PROCESS
GO_bp	GO_WOUND_HEALING	470	4	0.0253759	0.284081	SH2B3:HIF1A:MAPK1:PPARA	http://www.broadinstitute.org/gsea/msigdb/cards/GO_WOUND_HEALING
GO_bp	GO_REGULATION_OF_ANATOMICAL_STRUCTURE_SIZE	471	4	0.0255486	0.284081	HIF1A:NTN1:ADNP:JMY	http://www.broadinstitute.org/gsea/msigdb/cards/GO_REGULATION_OF_ANATOMICAL_STRUCTURE_SIZE
GO_bp	GO_PROTEASOMAL_PROTEIN_CATABOLIC_PROCESS	271	3	0.0265185	0.292628	ANAPC11:RNF126:GSK3A	http://www.broadinstitute.org/gsea/msigdb/cards/GO_PROTEASOMAL_PROTEIN_CATABOLIC_PROCESS
GO_bp	GO_REGULATION_OF_T_CELL_DIFFERENTIATION	107	2	0.0266341	0.293174	ITPKB:ZBTB1	http://www.broadinstitute.org/gsea/msigdb/cards/GO_REGULATION_OF_T_CELL_DIFFERENTIATION
GO_bp	GO_PROTEIN_COMPLEX_SUBUNIT_ORGANIZATION	1517	8	0.0268195	0.293936	SKI:CDC73:SORBS1:ZBTB1:BLM:FCHO1:NAPA:JMY	http://www.broadinstitute.org/gsea/msigdb/cards/GO_PROTEIN_COMPLEX_SUBUNIT_ORGANIZATION
GO_bp	GO_RESPONSE_TO_INORGANIC_SUBSTANCE	479	4	0.0269551	0.293936	ITPKB:HIF1A:BLM:ADNP	http://www.broadinstitute.org/gsea/msigdb/cards/GO_RESPONSE_TO_INORGANIC_SUBSTANCE
GO_bp	GO_UNSATURATED_FATTY_ACID_METABOLIC_PROCESS	108	2	0.0270957	0.293936	DEGS1:ACSL1	http://www.broadinstitute.org/gsea/msigdb/cards/GO_UNSATURATED_FATTY_ACID_METABOLIC_PROCESS
GO_bp	GO_REGULATION_OF_CYTOPLASMIC_TRANSPORT	480	4	0.0271342	0.293936	BAMBI:GSK3A:NAPA:MAPK1	http://www.broadinstitute.org/gsea/msigdb/cards/GO_REGULATION_OF_CYTOPLASMIC_TRANSPORT
GO_bp	GO_POSITIVE_REGULATION_OF_CELLULAR_AMIDE_METABOLIC_PROCESS	110	2	0.0280286	0.293936	ELAVL1:MAPK1	http://www.broadinstitute.org/gsea/msigdb/cards/GO_POSITIVE_REGULATION_OF_CELLULAR_AMIDE_METABOLIC_PROCESS
GO_bp	GO_REGULATION_OF_CHROMOSOME_ORGANIZATION	278	3	0.0283036	0.296048	SKI:ANAPC11:MAPK1	http://www.broadinstitute.org/gsea/msigdb/cards/GO_REGULATION_OF_CHROMOSOME_ORGANIZATION
GO_bp	GO_NEGATIVE_REGULATION_OF_DNA_METABOLIC_PROCESS	111	2	0.0284999	0.296048	BLM:MSH3	http://www.broadinstitute.org/gsea/msigdb/cards/GO_NEGATIVE_REGULATION_OF_DNA_METABOLIC_PROCESS
GO_bp	GO_ACTIVATION_OF_PROTEIN_KINASE_ACTIVITY	279	3	0.0285637	0.296048	ADNP:MAPK1:ADCY5	http://www.broadinstitute.org/gsea/msigdb/cards/GO_ACTIVATION_OF_PROTEIN_KINASE_ACTIVITY
GO_bp	GO_EMBRYONIC_ORGAN_MORPHOGENESIS	279	3	0.0285637	0.296048	HIF1A:NTN1:MAPK1	http://www.broadinstitute.org/gsea/msigdb/cards/GO_EMBRYONIC_ORGAN_MORPHOGENESIS
GO_bp	GO_VESICLE_ORGANIZATION	279	3	0.0285637	0.296048	VAPA:FCHO1:NAPA	http://www.broadinstitute.org/gsea/msigdb/cards/GO_VESICLE_ORGANIZATION
GO_bp	GO_EAR_MORPHOGENESIS	112	2	0.0289743	0.296503	NTN1:MAPK1	http://www.broadinstitute.org/gsea/msigdb/cards/GO_EAR_MORPHOGENESIS
GO_bp	GO_REGULATION_OF_LIPID_METABOLIC_PROCESS	282	3	0.0293518	0.296503	SORBS1:PANK2:PPARA	http://www.broadinstitute.org/gsea/msigdb/cards/GO_REGULATION_OF_LIPID_METABOLIC_PROCESS
GO_bp	GO_REGULATION_OF_STEM_CELL_DIFFERENTIATION	113	2	0.0294519	0.296503	BAMBI:ELAVL1	http://www.broadinstitute.org/gsea/msigdb/cards/GO_REGULATION_OF_STEM_CELL_DIFFERENTIATION
GO_bp	GO_REGULATION_OF_SYNAPSE_ORGANIZATION	113	2	0.0294519	0.296503	ADNP:EPHB3	http://www.broadinstitute.org/gsea/msigdb/cards/GO_REGULATION_OF_SYNAPSE_ORGANIZATION
GO_bp	GO_RESPONSE_TO_INTERLEUKIN_1	114	2	0.0299326	0.296503	HIF1A:PPP4C	http://www.broadinstitute.org/gsea/msigdb/cards/GO_RESPONSE_TO_INTERLEUKIN_1
GO_bp	GO_NOTCH_SIGNALING_PATHWAY	114	2	0.0299326	0.296503	CHAC1:HEY2	http://www.broadinstitute.org/gsea/msigdb/cards/GO_NOTCH_SIGNALING_PATHWAY
GO_bp	GO_MEMBRANE_LIPID_BIOSYNTHETIC_PROCESS	114	2	0.0299326	0.296503	DEGS1:VAPA	http://www.broadinstitute.org/gsea/msigdb/cards/GO_MEMBRANE_LIPID_BIOSYNTHETIC_PROCESS
GO_bp	GO_TRANSMEMBRANE_RECEPTOR_PROTEIN_TYROSINE_KINASE_SIGNALING_PATHWAY	498	4	0.0304795	0.297813	SORBS1:GSK3A:MAPK1:EPHB3	http://www.broadinstitute.org/gsea/msigdb/cards/GO_TRANSMEMBRANE_RECEPTOR_PROTEIN_TYROSINE_KINASE_SIGNALING_PATHWAY
GO_bp	GO_MOVEMENT_OF_CELL_OR_SUBCELLULAR_COMPONENT	1272	7	0.0307938	0.298512	SKI:BAMBI:HIF1A:NTN1:MAPK1:EPHB3:JMY	http://www.broadinstitute.org/gsea/msigdb/cards/GO_MOVEMENT_OF_CELL_OR_SUBCELLULAR_COMPONENT
GO_bp	GO_POSITIVE_REGULATION_OF_PROTEIN_SERINE_THREONINE_KINASE_ACTIVITY	288	3	0.0309622	0.298512	CCNL2:MAPK1:ACSL1	http://www.broadinstitute.org/gsea/msigdb/cards/GO_POSITIVE_REGULATION_OF_PROTEIN_SERINE_THREONINE_KINASE_ACTIVITY
GO_bp	GO_REGULATION_OF_CYTOSKELETON_ORGANIZATION	501	4	0.0310597	0.298512	RCC2:CAMSAP3:MAPK1:JMY	http://www.broadinstitute.org/gsea/msigdb/cards/GO_REGULATION_OF_CYTOSKELETON_ORGANIZATION
GO_bp	GO_NEGATIVE_REGULATION_OF_CELL_MORPHOGENESIS_INVOLVED_IN_DIFFERENTIATION	117	2	0.0313936	0.298512	RCC2:NTN1	http://www.broadinstitute.org/gsea/msigdb/cards/GO_NEGATIVE_REGULATION_OF_CELL_MORPHOGENESIS_INVOLVED_IN_DIFFERENTIATION
GO_bp	GO_AMIDE_BIOSYNTHETIC_PROCESS	503	4	0.0314502	0.298512	DEGS1:CHAC1:SLC25A10:SLC25A10:RPS15	http://www.broadinstitute.org/gsea/msigdb/cards/GO_AMIDE_BIOSYNTHETIC_PROCESS
GO_bp	GO_REGULATION_OF_BODY_FLUID_LEVELS	506	4	0.0320413	0.298512	SH2B3:HIF1A:MAPK1:ADCY5	http://www.broadinstitute.org/gsea/msigdb/cards/GO_REGULATION_OF_BODY_FLUID_LEVELS
GO_bp	GO_LEUKOCYTE_DIFFERENTIATION	292	3	0.0320613	0.298512	ITPKB:ZBTB1:CBFB	http://www.broadinstitute.org/gsea/msigdb/cards/GO_LEUKOCYTE_DIFFERENTIATION
GO_bp	GO_ANION_TRANSPORT	507	4	0.0322398	0.298512	SLC25A10:SLC25A10:PPARA:ACSL1:SLC12A2	http://www.broadinstitute.org/gsea/msigdb/cards/GO_ANION_TRANSPORT
GO_bp	GO_CELL_MATRIX_ADHESION	119	2	0.0323831	0.298512	RCC2:SORBS1	http://www.broadinstitute.org/gsea/msigdb/cards/GO_CELL_MATRIX_ADHESION
GO_bp	GO_DNA_METABOLIC_PROCESS	750	5	0.0325271	0.298512	ZBTB1:BLM:JMY:MSH3:REV3L	http://www.broadinstitute.org/gsea/msigdb/cards/GO_DNA_METABOLIC_PROCESS
GO_bp	GO_GLYCOSYL_COMPOUND_BIOSYNTHETIC_PROCESS	120	2	0.0328824	0.300287	PANK2:UCK1	http://www.broadinstitute.org/gsea/msigdb/cards/GO_GLYCOSYL_COMPOUND_BIOSYNTHETIC_PROCESS
GO_bp	GO_REGULATION_OF_BLOOD_CIRCULATION	295	3	0.0328989	0.300287	HIF1A:GSK3A:HEY2	http://www.broadinstitute.org/gsea/msigdb/cards/GO_REGULATION_OF_BLOOD_CIRCULATION
GO_bp	GO_POSITIVE_REGULATION_OF_ESTABLISHMENT_OF_PROTEIN_LOCALIZATION	512	4	0.0332432	0.302234	BAMBI:SORBS1:HIF1A:GSK3A	http://www.broadinstitute.org/gsea/msigdb/cards/GO_POSITIVE_REGULATION_OF_ESTABLISHMENT_OF_PROTEIN_LOCALIZATION
GO_bp	GO_REGULATION_OF_EPITHELIAL_CELL_DIFFERENTIATION	121	2	0.0333847	0.302234	GSK3A:HEY2	http://www.broadinstitute.org/gsea/msigdb/cards/GO_REGULATION_OF_EPITHELIAL_CELL_DIFFERENTIATION
GO_bp	GO_LOCALIZATION_WITHIN_MEMBRANE	121	2	0.0333847	0.302234	VAPA:NAPA	http://www.broadinstitute.org/gsea/msigdb/cards/GO_LOCALIZATION_WITHIN_MEMBRANE
GO_bp	GO_NEGATIVE_REGULATION_OF_CELLULAR_RESPONSE_TO_GROWTH_FACTOR_STIMULUS	121	2	0.0333847	0.302234	SKI:BAMBI	http://www.broadinstitute.org/gsea/msigdb/cards/GO_NEGATIVE_REGULATION_OF_CELLULAR_RESPONSE_TO_GROWTH_FACTOR_STIMULUS
GO_bp	GO_CELLULAR_RESPONSE_TO_TOPOLOGICALLY_INCORRECT_PROTEIN	122	2	0.03389	0.305561	RNF126:GSK3A	http://www.broadinstitute.org/gsea/msigdb/cards/GO_CELLULAR_RESPONSE_TO_TOPOLOGICALLY_INCORRECT_PROTEIN
GO_bp	GO_PROTEIN_LOCALIZATION_TO_ENDOPLASMIC_RETICULUM	122	2	0.03389	0.305561	VAPA:RPS15	http://www.broadinstitute.org/gsea/msigdb/cards/GO_PROTEIN_LOCALIZATION_TO_ENDOPLASMIC_RETICULUM
GO_bp	GO_MODULATION_OF_SYNAPTIC_TRANSMISSION	299	3	0.0340335	0.306233	NAPA:ADNP:MAPK1	http://www.broadinstitute.org/gsea/msigdb/cards/GO_MODULATION_OF_SYNAPTIC_TRANSMISSION
GO_bp	GO_POSITIVE_REGULATION_OF_MITOTIC_CELL_CYCLE	123	2	0.0343984	0.306652	RCC2:ANAPC11	http://www.broadinstitute.org/gsea/msigdb/cards/GO_POSITIVE_REGULATION_OF_MITOTIC_CELL_CYCLE
GO_bp	GO_T_CELL_DIFFERENTIATION	123	2	0.0343984	0.306652	ITPKB:ZBTB1	http://www.broadinstitute.org/gsea/msigdb/cards/GO_T_CELL_DIFFERENTIATION
GO_bp	GO_POSITIVE_REGULATION_OF_CELL_PROJECTION_ORGANIZATION	302	3	0.0348977	0.306652	NTN1:ADNP:CUX1	http://www.broadinstitute.org/gsea/msigdb/cards/GO_POSITIVE_REGULATION_OF_CELL_PROJECTION_ORGANIZATION
GO_bp	GO_MONOCARBOXYLIC_ACID_TRANSPORT	124	2	0.0349097	0.306652	PPARA:ACSL1	http://www.broadinstitute.org/gsea/msigdb/cards/GO_MONOCARBOXYLIC_ACID_TRANSPORT
GO_bp	GO_NEGATIVE_REGULATION_OF_HOMEOSTATIC_PROCESS	124	2	0.0349097	0.306652	ITPKB:PIM3	http://www.broadinstitute.org/gsea/msigdb/cards/GO_NEGATIVE_REGULATION_OF_HOMEOSTATIC_PROCESS
GO_bp	GO_CELL_CELL_SIGNALING	766	5	0.0351331	0.308005	GSK3A:NAPA:LHB:MAPK1:KLF10	http://www.broadinstitute.org/gsea/msigdb/cards/GO_CELL_CELL_SIGNALING
GO_bp	GO_OSTEOBLAST_DIFFERENTIATION	126	2	0.0359412	0.310525	CBFB:RPS15	http://www.broadinstitute.org/gsea/msigdb/cards/GO_OSTEOBLAST_DIFFERENTIATION
GO_bp	GO_COENZYME_BIOSYNTHETIC_PROCESS	127	2	0.0364614	0.310525	PANK2:ACSL1	http://www.broadinstitute.org/gsea/msigdb/cards/GO_COENZYME_BIOSYNTHETIC_PROCESS
GO_bp	GO_MUSCLE_CELL_DEVELOPMENT	127	2	0.0364614	0.310525	SKI:HEY2	http://www.broadinstitute.org/gsea/msigdb/cards/GO_MUSCLE_CELL_DEVELOPMENT
GO_bp	GO_POSITIVE_REGULATION_OF_BINDING	127	2	0.0364614	0.310525	SKI:BAMBI	http://www.broadinstitute.org/gsea/msigdb/cards/GO_POSITIVE_REGULATION_OF_BINDING
GO_bp	GO_REGULATION_OF_PHOSPHATASE_ACTIVITY	128	2	0.0369845	0.310525	CAMSAP3:PCIF1	http://www.broadinstitute.org/gsea/msigdb/cards/GO_REGULATION_OF_PHOSPHATASE_ACTIVITY
GO_bp	GO_POSITIVE_REGULATION_OF_LIPID_METABOLIC_PROCESS	128	2	0.0369845	0.310525	SORBS1:PPARA	http://www.broadinstitute.org/gsea/msigdb/cards/GO_POSITIVE_REGULATION_OF_LIPID_METABOLIC_PROCESS
GO_bp	GO_NEGATIVE_REGULATION_OF_HEMOPOIESIS	128	2	0.0369845	0.310525	CDC73:ITPKB	http://www.broadinstitute.org/gsea/msigdb/cards/GO_NEGATIVE_REGULATION_OF_HEMOPOIESIS
GO_bp	GO_CARBOHYDRATE_DERIVATIVE_METABOLIC_PROCESS	1043	6	0.0369929	0.310525	MACROD1:HIF1A:CHSY1:PANK2:ADCY5:UCK1	http://www.broadinstitute.org/gsea/msigdb/cards/GO_CARBOHYDRATE_DERIVATIVE_METABOLIC_PROCESS
GO_bp	GO_INTRACELLULAR_PROTEIN_TRANSPORT	778	5	0.0371706	0.310525	RASD1:RPS15:NAPA:MAPK1:CLTB	http://www.broadinstitute.org/gsea/msigdb/cards/GO_INTRACELLULAR_PROTEIN_TRANSPORT
GO_bp	GO_REGULATION_OF_CAMP_METABOLIC_PROCESS	129	2	0.0375105	0.310836	GSK3A:ADCY5	http://www.broadinstitute.org/gsea/msigdb/cards/GO_REGULATION_OF_CAMP_METABOLIC_PROCESS
GO_bp	GO_TUBE_FORMATION	129	2	0.0375105	0.310836	SKI:HIF1A	http://www.broadinstitute.org/gsea/msigdb/cards/GO_TUBE_FORMATION
GO_bp	GO_CELL_JUNCTION_ASSEMBLY	129	2	0.0375105	0.310836	RCC2:SORBS1	http://www.broadinstitute.org/gsea/msigdb/cards/GO_CELL_JUNCTION_ASSEMBLY
GO_bp	GO_IN_UTERO_EMBRYONIC_DEVELOPMENT	311	3	0.0375582	0.310836	HIF1A:MAPK1:HEY2	http://www.broadinstitute.org/gsea/msigdb/cards/GO_IN_UTERO_EMBRYONIC_DEVELOPMENT
GO_bp	GO_REGIONALIZATION	311	3	0.0375582	0.310836	SKI:CHSY1:HEY2	http://www.broadinstitute.org/gsea/msigdb/cards/GO_REGIONALIZATION
GO_bp	GO_TISSUE_MORPHOGENESIS	533	4	0.0376563	0.311068	SKI:HIF1A:NTN1:HEY2	http://www.broadinstitute.org/gsea/msigdb/cards/GO_TISSUE_MORPHOGENESIS
GO_bp	GO_CELL_MATURATION	131	2	0.038571	0.311085	HIF1A:CBFB	http://www.broadinstitute.org/gsea/msigdb/cards/GO_CELL_MATURATION
GO_bp	GO_RETINA_DEVELOPMENT_IN_CAMERA_TYPE_EYE	131	2	0.038571	0.311085	SKI:HIF1A	http://www.broadinstitute.org/gsea/msigdb/cards/GO_RETINA_DEVELOPMENT_IN_CAMERA_TYPE_EYE
GO_bp	GO_REGULATION_OF_LYMPHOCYTE_DIFFERENTIATION	132	2	0.0391056	0.311085	ITPKB:ZBTB1	http://www.broadinstitute.org/gsea/msigdb/cards/GO_REGULATION_OF_LYMPHOCYTE_DIFFERENTIATION
GO_bp	GO_GOLGI_VESICLE_TRANSPORT	318	3	0.0396976	0.312786	VAPA:NAPA:CUX1	http://www.broadinstitute.org/gsea/msigdb/cards/GO_GOLGI_VESICLE_TRANSPORT
GO_cc	GO_CELL_CELL_JUNCTION	383	4	0.0129978	0.314113	SORBS1:VAPA:CAMSAP3:PARD3B	http://www.broadinstitute.org/gsea/msigdb/cards/GO_CELL_CELL_JUNCTION
GO_bp	GO_RESPONSE_TO_ACID_CHEMICAL	319	3	0.0400082	0.314674	KCNK4:HIF1A:ACSL1	http://www.broadinstitute.org/gsea/msigdb/cards/GO_RESPONSE_TO_ACID_CHEMICAL
GO_bp	GO_MORPHOGENESIS_OF_EMBRYONIC_EPITHELIUM	134	2	0.0401833	0.315492	SKI:HIF1A	http://www.broadinstitute.org/gsea/msigdb/cards/GO_MORPHOGENESIS_OF_EMBRYONIC_EPITHELIUM
GO_bp	GO_RESPONSE_TO_MOLECULE_OF_BACTERIAL_ORIGIN	320	3	0.04032	0.316006	CDC73:HIF1A:MAPK1	http://www.broadinstitute.org/gsea/msigdb/cards/GO_RESPONSE_TO_MOLECULE_OF_BACTERIAL_ORIGIN
GO_mf	GO_MICROTUBULE_BINDING	201	3	0.0121148	0.317281	RCC2:VAPA:CAMSAP3	http://www.broadinstitute.org/gsea/msigdb/cards/GO_MICROTUBULE_BINDING
GO_mf	GO_SMAD_BINDING	71	2	0.012325	0.317281	SKI:TCF12	http://www.broadinstitute.org/gsea/msigdb/cards/GO_SMAD_BINDING
GO_bp	GO_NEGATIVE_REGULATION_OF_NEURON_APOPTOTIC_PROCESS	135	2	0.0407263	0.318067	HIF1A:ADNP	http://www.broadinstitute.org/gsea/msigdb/cards/GO_NEGATIVE_REGULATION_OF_NEURON_APOPTOTIC_PROCESS
GO_bp	GO_ADULT_BEHAVIOR	135	2	0.0407263	0.318067	PUM1:PPARA	http://www.broadinstitute.org/gsea/msigdb/cards/GO_ADULT_BEHAVIOR
GO_bp	GO_EYE_MORPHOGENESIS	136	2	0.0412721	0.318791	SKI:HIF1A	http://www.broadinstitute.org/gsea/msigdb/cards/GO_EYE_MORPHOGENESIS
GO_bp	GO_GLIAL_CELL_DIFFERENTIATION	136	2	0.0412721	0.318791	SKI:MAPK1	http://www.broadinstitute.org/gsea/msigdb/cards/GO_GLIAL_CELL_DIFFERENTIATION
GO_bp	GO_REGULATION_OF_CELLULAR_PROTEIN_LOCALIZATION	552	4	0.0419271	0.319582	RCC2:BAMBI:SORBS1:GSK3A	http://www.broadinstitute.org/gsea/msigdb/cards/GO_REGULATION_OF_CELLULAR_PROTEIN_LOCALIZATION
GO_bp	GO_SPHINGOLIPID_METABOLIC_PROCESS	138	2	0.0423721	0.319582	DEGS1:VAPA	http://www.broadinstitute.org/gsea/msigdb/cards/GO_SPHINGOLIPID_METABOLIC_PROCESS
GO_bp	GO_EMBRYO_DEVELOPMENT_ENDING_IN_BIRTH_OR_EGG_HATCHING	554	4	0.042392	0.319582	SKI:HIF1A:MAPK1:HEY2	http://www.broadinstitute.org/gsea/msigdb/cards/GO_EMBRYO_DEVELOPMENT_ENDING_IN_BIRTH_OR_EGG_HATCHING
GO_bp	GO_PROTEIN_LOCALIZATION_TO_ORGANELLE	555	4	0.0426256	0.319582	RCC2:VAPA:RPS15:MAPK1	http://www.broadinstitute.org/gsea/msigdb/cards/GO_PROTEIN_LOCALIZATION_TO_ORGANELLE
GO_bp	GO_REGULATION_OF_RNA_STABILITY	139	2	0.0429262	0.319582	PUM1:ELAVL1	http://www.broadinstitute.org/gsea/msigdb/cards/GO_REGULATION_OF_RNA_STABILITY
GO_bp	GO_PURINE_CONTAINING_COMPOUND_BIOSYNTHETIC_PROCESS	139	2	0.0429262	0.319582	PANK2:ADCY5	http://www.broadinstitute.org/gsea/msigdb/cards/GO_PURINE_CONTAINING_COMPOUND_BIOSYNTHETIC_PROCESS
GO_bp	GO_REGULATION_OF_CELL_CYCLE_PROCESS	558	4	0.0433307	0.319582	RCC2:CDC73:BLM:ANAPC11	http://www.broadinstitute.org/gsea/msigdb/cards/GO_REGULATION_OF_CELL_CYCLE_PROCESS
GO_bp	GO_POSITIVE_REGULATION_OF_CELL_PROLIFERATION	813	5	0.0435244	0.319582	BAMBI:HIF1A:NTN1:MAPK1:HEY2	http://www.broadinstitute.org/gsea/msigdb/cards/GO_POSITIVE_REGULATION_OF_CELL_PROLIFERATION
GO_bp	GO_POSITIVE_REGULATION_OF_CELL_CYCLE	332	3	0.0441585	0.320601	CCNL2:RCC2:ANAPC11	http://www.broadinstitute.org/gsea/msigdb/cards/GO_POSITIVE_REGULATION_OF_CELL_CYCLE
GO_bp	GO_RESPONSE_TO_WOUNDING	563	4	0.0445205	0.322701	SH2B3:HIF1A:MAPK1:PPARA	http://www.broadinstitute.org/gsea/msigdb/cards/GO_RESPONSE_TO_WOUNDING
GO_mf	GO_CYTOSKELETAL_PROTEIN_BINDING	817	6	0.0128974	0.322793	RCC2:SORBS1:VAPA:CAMSAP3:ADNP:JMY	http://www.broadinstitute.org/gsea/msigdb/cards/GO_CYTOSKELETAL_PROTEIN_BINDING
GO_bp	GO_COFACTOR_METABOLIC_PROCESS	334	3	0.0448155	0.324309	PANK2:ACSL1:DGAT1	http://www.broadinstitute.org/gsea/msigdb/cards/GO_COFACTOR_METABOLIC_PROCESS
GO_mf	GO_SIGNALING_ADAPTOR_ACTIVITY	74	2	0.0133354	0.324735	SORBS1:SH2B3	http://www.broadinstitute.org/gsea/msigdb/cards/GO_SIGNALING_ADAPTOR_ACTIVITY
GO_bp	GO_PEPTIDE_METABOLIC_PROCESS	565	4	0.0450016	0.325126	CHAC1:SLC25A10:SLC25A10:RPS15:LHB	http://www.broadinstitute.org/gsea/msigdb/cards/GO_PEPTIDE_METABOLIC_PROCESS
GO_bp	GO_CELL_ACTIVATION	566	4	0.0452432	0.32634	ITPKB:ZBTB1:CBFB:MAPK1	http://www.broadinstitute.org/gsea/msigdb/cards/GO_CELL_ACTIVATION
GO_bp	GO_POSITIVE_REGULATION_OF_CELL_GROWTH	145	2	0.0463073	0.326581	NTN1:ADNP	http://www.broadinstitute.org/gsea/msigdb/cards/GO_POSITIVE_REGULATION_OF_CELL_GROWTH
GO_bp	GO_RESPONSE_TO_IONIZING_RADIATION	145	2	0.0463073	0.326581	HIF1A:BLM	http://www.broadinstitute.org/gsea/msigdb/cards/GO_RESPONSE_TO_IONIZING_RADIATION
GO_bp	GO_REGULATION_OF_IMMUNE_SYSTEM_PROCESS	1393	7	0.0465358	0.327671	PUM1:CDC73:ITPKB:HIF1A:ZBTB1:MAPK1:KLF10	http://www.broadinstitute.org/gsea/msigdb/cards/GO_REGULATION_OF_IMMUNE_SYSTEM_PROCESS
GO_bp	GO_NEGATIVE_REGULATION_OF_CELL_CYCLE_PHASE_TRANSITION	146	2	0.0468802	0.329573	CDC73:BLM	http://www.broadinstitute.org/gsea/msigdb/cards/GO_NEGATIVE_REGULATION_OF_CELL_CYCLE_PHASE_TRANSITION
GO_bp	GO_LYMPHOCYTE_ACTIVATION	341	3	0.0471533	0.330968	ITPKB:ZBTB1:CBFB	http://www.broadinstitute.org/gsea/msigdb/cards/GO_LYMPHOCYTE_ACTIVATION
GO_bp	GO_CARTILAGE_DEVELOPMENT	147	2	0.0474556	0.331738	HIF1A:CHSY1	http://www.broadinstitute.org/gsea/msigdb/cards/GO_CARTILAGE_DEVELOPMENT
GO_bp	GO_DIGESTIVE_SYSTEM_DEVELOPMENT	148	2	0.0480337	0.331738	HIF1A:EPHB3	http://www.broadinstitute.org/gsea/msigdb/cards/GO_DIGESTIVE_SYSTEM_DEVELOPMENT
GO_bp	GO_PEPTIDYL_AMINO_ACID_MODIFICATION	836	5	0.0480366	0.331738	BLM:SENP3:MAPK1:EPHB3:CUX1	http://www.broadinstitute.org/gsea/msigdb/cards/GO_PEPTIDYL_AMINO_ACID_MODIFICATION
GO_bp	GO_PROTEIN_CATABOLIC_PROCESS	578	4	0.0481999	0.331738	FBXL14:ANAPC11:RNF126:GSK3A	http://www.broadinstitute.org/gsea/msigdb/cards/GO_PROTEIN_CATABOLIC_PROCESS
GO_bp	GO_NEURAL_TUBE_DEVELOPMENT	149	2	0.0486143	0.332285	SKI:HIF1A	http://www.broadinstitute.org/gsea/msigdb/cards/GO_NEURAL_TUBE_DEVELOPMENT
GO_bp	GO_POSITIVE_REGULATION_OF_CHROMOSOME_ORGANIZATION	150	2	0.0491975	0.335754	ANAPC11:MAPK1	http://www.broadinstitute.org/gsea/msigdb/cards/GO_POSITIVE_REGULATION_OF_CHROMOSOME_ORGANIZATION
GO_bp	GO_PROTEIN_COMPLEX_BIOGENESIS	1124	6	0.0500196	0.337751	SKI:CDC73:ZBTB1:BLM:FCHO1:NAPA	http://www.broadinstitute.org/gsea/msigdb/cards/GO_PROTEIN_COMPLEX_BIOGENESIS
GO_bp	GO_NEGATIVE_REGULATION_OF_TRANSFERASE_ACTIVITY	351	3	0.0505957	0.337751	GPS2:ANAPC11:GSK3A	http://www.broadinstitute.org/gsea/msigdb/cards/GO_NEGATIVE_REGULATION_OF_TRANSFERASE_ACTIVITY
GO_bp	GO_POTASSIUM_ION_TRANSPORT	153	2	0.0509623	0.338934	KCNK4:SLC12A2	http://www.broadinstitute.org/gsea/msigdb/cards/GO_POTASSIUM_ION_TRANSPORT
GO_bp	GO_POSITIVE_REGULATION_OF_PROTEIN_MODIFICATION_PROCESS	1131	6	0.0512631	0.34015	CCNL2:ANAPC11:ADNP:MAPK1:ADCY5:ACSL1	http://www.broadinstitute.org/gsea/msigdb/cards/GO_POSITIVE_REGULATION_OF_PROTEIN_MODIFICATION_PROCESS
GO_bp	GO_REGULATION_OF_CELLULAR_AMIDE_METABOLIC_PROCESS	353	3	0.0512986	0.34015	PUM1:ELAVL1:MAPK1	http://www.broadinstitute.org/gsea/msigdb/cards/GO_REGULATION_OF_CELLULAR_AMIDE_METABOLIC_PROCESS
GO_bp	GO_CELL_CYCLE_ARREST	154	2	0.0515557	0.341345	ZFHX3:JMY	http://www.broadinstitute.org/gsea/msigdb/cards/GO_CELL_CYCLE_ARREST
GO_bp	GO_NUCLEAR_TRANSPORT	354	3	0.0516518	0.341472	RASD1:RPS15:MAPK1	http://www.broadinstitute.org/gsea/msigdb/cards/GO_NUCLEAR_TRANSPORT
GO_bp	GO_CARBOHYDRATE_DERIVATIVE_BIOSYNTHETIC_PROCESS	593	4	0.0520438	0.341913	CHSY1:PANK2:ADCY5:UCK1	http://www.broadinstitute.org/gsea/msigdb/cards/GO_CARBOHYDRATE_DERIVATIVE_BIOSYNTHETIC_PROCESS
GO_bp	GO_NEGATIVE_REGULATION_OF_CELLULAR_CATABOLIC_PROCESS	155	2	0.0521515	0.341913	GSK3A:PPARA	http://www.broadinstitute.org/gsea/msigdb/cards/GO_NEGATIVE_REGULATION_OF_CELLULAR_CATABOLIC_PROCESS
GO_bp	GO_FOREBRAIN_DEVELOPMENT	356	3	0.0523619	0.341913	SKI:HIF1A:EPHB3	http://www.broadinstitute.org/gsea/msigdb/cards/GO_FOREBRAIN_DEVELOPMENT
GO_bp	GO_GLYCEROLIPID_METABOLIC_PROCESS	356	3	0.0523619	0.341913	AGPAT9:ACSL1:DGAT1	http://www.broadinstitute.org/gsea/msigdb/cards/GO_GLYCEROLIPID_METABOLIC_PROCESS
GO_bp	GO_POSITIVE_REGULATION_OF_IMMUNE_EFFECTOR_PROCESS	156	2	0.0527498	0.341913	PUM1:ZBTB1	http://www.broadinstitute.org/gsea/msigdb/cards/GO_POSITIVE_REGULATION_OF_IMMUNE_EFFECTOR_PROCESS
GO_bp	GO_MEMBRANE_FUSION	156	2	0.0527498	0.341913	VAPA:NAPA	http://www.broadinstitute.org/gsea/msigdb/cards/GO_MEMBRANE_FUSION
GO_bp	GO_BONE_DEVELOPMENT	156	2	0.0527498	0.341913	SKI:CHSY1	http://www.broadinstitute.org/gsea/msigdb/cards/GO_BONE_DEVELOPMENT
GO_bp	GO_POSITIVE_REGULATION_OF_MULTI_ORGANISM_PROCESS	157	2	0.0533506	0.343987	PUM1:VAPA	http://www.broadinstitute.org/gsea/msigdb/cards/GO_POSITIVE_REGULATION_OF_MULTI_ORGANISM_PROCESS
GO_bp	GO_HORMONE_MEDIATED_SIGNALING_PATHWAY	158	2	0.0539538	0.346656	PPARA:ACSL1	http://www.broadinstitute.org/gsea/msigdb/cards/GO_HORMONE_MEDIATED_SIGNALING_PATHWAY
GO_bp	GO_REGULATION_OF_DEPHOSPHORYLATION	158	2	0.0539538	0.346656	CAMSAP3:PCIF1	http://www.broadinstitute.org/gsea/msigdb/cards/GO_REGULATION_OF_DEPHOSPHORYLATION
GO_bp	GO_MRNA_METABOLIC_PROCESS	603	4	0.0546974	0.346656	CDC73:RPS15:ELAVL1:PUF60	http://www.broadinstitute.org/gsea/msigdb/cards/GO_MRNA_METABOLIC_PROCESS
GO_bp	GO_CELL_CELL_ADHESION	604	4	0.0549668	0.346656	ITPKB:ZBTB1:NTN1:CAMSAP3	http://www.broadinstitute.org/gsea/msigdb/cards/GO_CELL_CELL_ADHESION
GO_bp	GO_SECOND_MESSENGER_MEDIATED_SIGNALING	160	2	0.0551675	0.346656	RASD1:ADCY5	http://www.broadinstitute.org/gsea/msigdb/cards/GO_SECOND_MESSENGER_MEDIATED_SIGNALING
GO_bp	GO_BLOOD_VESSEL_MORPHOGENESIS	364	3	0.0552493	0.346656	HIF1A:EPHB3:HEY2	http://www.broadinstitute.org/gsea/msigdb/cards/GO_BLOOD_VESSEL_MORPHOGENESIS
GO_bp	GO_REGULATION_OF_SIGNAL_TRANSDUCTION_BY_P53_CLASS_MEDIATOR	161	2	0.055778	0.348986	BLM:JMY	http://www.broadinstitute.org/gsea/msigdb/cards/GO_REGULATION_OF_SIGNAL_TRANSDUCTION_BY_P53_CLASS_MEDIATOR
GO_bp	GO_REGULATION_OF_DNA_REPLICATION	161	2	0.055778	0.348986	BLM:MAPK1	http://www.broadinstitute.org/gsea/msigdb/cards/GO_REGULATION_OF_DNA_REPLICATION
GO_bp	GO_POSITIVE_REGULATION_OF_INTRACELLULAR_SIGNAL_TRANSDUCTION	873	5	0.0558606	0.349011	PUM1:ITPKB:VAPA:MAPK1:CXXC5	http://www.broadinstitute.org/gsea/msigdb/cards/GO_POSITIVE_REGULATION_OF_INTRACELLULAR_SIGNAL_TRANSDUCTION
GO_bp	GO_CIRCULATORY_SYSTEM_PROCESS	366	3	0.055983	0.349283	HIF1A:GSK3A:PPARA	http://www.broadinstitute.org/gsea/msigdb/cards/GO_CIRCULATORY_SYSTEM_PROCESS
GO_bp	GO_CELL_MORPHOGENESIS_INVOLVED_IN_NEURON_DIFFERENTIATION	368	3	0.0567213	0.350384	NTN1:MAPK1:EPHB3	http://www.broadinstitute.org/gsea/msigdb/cards/GO_CELL_MORPHOGENESIS_INVOLVED_IN_NEURON_DIFFERENTIATION
GO_bp	GO_GLYCOSYL_COMPOUND_METABOLIC_PROCESS	368	3	0.0567213	0.350384	MACROD1:PANK2:UCK1	http://www.broadinstitute.org/gsea/msigdb/cards/GO_GLYCOSYL_COMPOUND_METABOLIC_PROCESS
GO_bp	GO_HORMONE_METABOLIC_PROCESS	164	2	0.0576238	0.351125	LHB:DGAT1	http://www.broadinstitute.org/gsea/msigdb/cards/GO_HORMONE_METABOLIC_PROCESS
GO_bp	GO_REGULATION_OF_RESPONSE_TO_STRESS	1465	7	0.0580009	0.352938	PUM1:HIF1A:PPP4C:GPS2:GSK3A:MAPK1:PPARA	http://www.broadinstitute.org/gsea/msigdb/cards/GO_REGULATION_OF_RESPONSE_TO_STRESS
GO_bp	GO_COFACTOR_BIOSYNTHETIC_PROCESS	166	2	0.0588661	0.35614	PANK2:ACSL1	http://www.broadinstitute.org/gsea/msigdb/cards/GO_COFACTOR_BIOSYNTHETIC_PROCESS
GO_bp	GO_REGULATION_OF_PROTEIN_COMPLEX_ASSEMBLY	374	3	0.0589641	0.35614	NAPA:JMY:HEY2	http://www.broadinstitute.org/gsea/msigdb/cards/GO_REGULATION_OF_PROTEIN_COMPLEX_ASSEMBLY
GO_bp	GO_REGULATION_OF_INTRACELLULAR_TRANSPORT	620	4	0.059375	0.35614	BAMBI:GSK3A:NAPA:MAPK1	http://www.broadinstitute.org/gsea/msigdb/cards/GO_REGULATION_OF_INTRACELLULAR_TRANSPORT
GO_bp	GO_POSITIVE_REGULATION_OF_MITOCHONDRION_ORGANIZATION	167	2	0.0594907	0.35614	HIF1A:GSK3A	http://www.broadinstitute.org/gsea/msigdb/cards/GO_POSITIVE_REGULATION_OF_MITOCHONDRION_ORGANIZATION
GO_bp	GO_RESPONSE_TO_CARBOHYDRATE	167	2	0.0594907	0.35614	HIF1A:ADNP	http://www.broadinstitute.org/gsea/msigdb/cards/GO_RESPONSE_TO_CARBOHYDRATE
GO_bp	GO_ER_TO_GOLGI_VESICLE_MEDIATED_TRANSPORT	167	2	0.0594907	0.35614	VAPA:NAPA	http://www.broadinstitute.org/gsea/msigdb/cards/GO_ER_TO_GOLGI_VESICLE_MEDIATED_TRANSPORT
GO_bp	GO_OXIDATION_REDUCTION_PROCESS	894	5	0.0606124	0.361393	DEGS1:SLC25A10:SLC25A10:GPX4:GSK3A:PANK2	http://www.broadinstitute.org/gsea/msigdb/cards/GO_OXIDATION_REDUCTION_PROCESS
GO_bp	GO_REGULATION_OF_BLOOD_PRESSURE	169	2	0.0607469	0.361623	GSK3A:PPARA	http://www.broadinstitute.org/gsea/msigdb/cards/GO_REGULATION_OF_BLOOD_PRESSURE
GO_bp	GO_MEMBRANE_ORGANIZATION	896	5	0.0610767	0.361623	VAPA:RPS15:FCHO1:GSK3A:NAPA	http://www.broadinstitute.org/gsea/msigdb/cards/GO_MEMBRANE_ORGANIZATION
GO_bp	GO_NEGATIVE_REGULATION_OF_CELL_GROWTH	170	2	0.0613784	0.361623	NTN1:GSK3A	http://www.broadinstitute.org/gsea/msigdb/cards/GO_NEGATIVE_REGULATION_OF_CELL_GROWTH
GO_bp	GO_PROTEIN_LOCALIZATION	1800	8	0.0621941	0.363017	RCC2:RASD1:VAPA:RPS15:NAPA:MAPK1:CLTB:HEY2	http://www.broadinstitute.org/gsea/msigdb/cards/GO_PROTEIN_LOCALIZATION
GO_bp	GO_CELL_PROJECTION_ORGANIZATION	902	5	0.0624818	0.364217	NTN1:VAPA:CAMSAP3:MAPK1:EPHB3	http://www.broadinstitute.org/gsea/msigdb/cards/GO_CELL_PROJECTION_ORGANIZATION
GO_bp	GO_STRIATED_MUSCLE_CELL_DIFFERENTIATION	172	2	0.0626482	0.36423	SKI:HEY2	http://www.broadinstitute.org/gsea/msigdb/cards/GO_STRIATED_MUSCLE_CELL_DIFFERENTIATION
GO_bp	GO_ACTIN_FILAMENT_ORGANIZATION	172	2	0.0626482	0.36423	SORBS1:JMY	http://www.broadinstitute.org/gsea/msigdb/cards/GO_ACTIN_FILAMENT_ORGANIZATION
GO_bp	GO_CELL_PART_MORPHOGENESIS	633	4	0.0630924	0.364498	NTN1:PANK2:MAPK1:EPHB3	http://www.broadinstitute.org/gsea/msigdb/cards/GO_CELL_PART_MORPHOGENESIS
GO_bp	GO_NCRNA_PROCESSING	385	3	0.0631834	0.364498	PUSL1:SENP3:RPS15	http://www.broadinstitute.org/gsea/msigdb/cards/GO_NCRNA_PROCESSING
GO_bp	GO_REGULATION_OF_CELLULAR_KETONE_METABOLIC_PROCESS	173	2	0.0632864	0.364498	PANK2:PPARA	http://www.broadinstitute.org/gsea/msigdb/cards/GO_REGULATION_OF_CELLULAR_KETONE_METABOLIC_PROCESS
GO_bp	GO_PROTEOLYSIS	1195	6	0.0635169	0.364498	FBXL14:SENP3:ANAPC11:RNF126:GSK3A:LHB	http://www.broadinstitute.org/gsea/msigdb/cards/GO_PROTEOLYSIS
GO_bp	GO_ORGANIC_ANION_TRANSPORT	387	3	0.0639654	0.364498	SLC25A10:SLC25A10:PPARA:ACSL1	http://www.broadinstitute.org/gsea/msigdb/cards/GO_ORGANIC_ANION_TRANSPORT
GO_bp	GO_REGULATION_OF_CELL_GROWTH	388	3	0.064358	0.36488	NTN1:GSK3A:ADNP	http://www.broadinstitute.org/gsea/msigdb/cards/GO_REGULATION_OF_CELL_GROWTH
GO_bp	GO_GLIOGENESIS	175	2	0.0645696	0.36488	SKI:MAPK1	http://www.broadinstitute.org/gsea/msigdb/cards/GO_GLIOGENESIS
GO_bp	GO_CELLULAR_RESPONSE_TO_ACID_CHEMICAL	175	2	0.0645696	0.36488	KCNK4:HIF1A	http://www.broadinstitute.org/gsea/msigdb/cards/GO_CELLULAR_RESPONSE_TO_ACID_CHEMICAL
GO_bp	GO_POSITIVE_REGULATION_OF_CYTOSKELETON_ORGANIZATION	175	2	0.0645696	0.36488	RCC2:JMY	http://www.broadinstitute.org/gsea/msigdb/cards/GO_POSITIVE_REGULATION_OF_CYTOSKELETON_ORGANIZATION
GO_bp	GO_HOMEOSTASIS_OF_NUMBER_OF_CELLS	175	2	0.0645696	0.36488	ITPKB:HIF1A	http://www.broadinstitute.org/gsea/msigdb/cards/GO_HOMEOSTASIS_OF_NUMBER_OF_CELLS
GO_bp	GO_MITOCHONDRIAL_TRANSPORT	177	2	0.0658616	0.369037	SLC25A10:SLC25A10:GSK3A	http://www.broadinstitute.org/gsea/msigdb/cards/GO_MITOCHONDRIAL_TRANSPORT
GO_bp	GO_PURINE_CONTAINING_COMPOUND_METABOLIC_PROCESS	394	3	0.0667376	0.370988	MACROD1:PANK2:ADCY5	http://www.broadinstitute.org/gsea/msigdb/cards/GO_PURINE_CONTAINING_COMPOUND_METABOLIC_PROCESS
GO_bp	GO_POSITIVE_REGULATION_OF_I_KAPPAB_KINASE_NF_KAPPAB_SIGNALING	179	2	0.0671623	0.372881	VAPA:CXXC5	http://www.broadinstitute.org/gsea/msigdb/cards/GO_POSITIVE_REGULATION_OF_I_KAPPAB_KINASE_NF_KAPPAB_SIGNALING
GO_cc	GO_MICROTUBULE_ORGANIZING_CENTER	623	5	0.0161315	0.374251	SKI:SORBS1:PPP4C:CAMSAP3:MAPK1	http://www.broadinstitute.org/gsea/msigdb/cards/GO_MICROTUBULE_ORGANIZING_CENTER
GO_bp	GO_MACROMOLECULE_CATABOLIC_PROCESS	924	5	0.0677909	0.375665	FBXL14:ANAPC11:RNF126:RPS15:GSK3A	http://www.broadinstitute.org/gsea/msigdb/cards/GO_MACROMOLECULE_CATABOLIC_PROCESS
GO_bp	GO_LOCOMOTORY_BEHAVIOR	181	2	0.0684715	0.375665	PUM1:ADCY5	http://www.broadinstitute.org/gsea/msigdb/cards/GO_LOCOMOTORY_BEHAVIOR
GO_bp	GO_MORPHOGENESIS_OF_AN_EPITHELIUM	400	3	0.0691573	0.378743	SKI:HIF1A:NTN1	http://www.broadinstitute.org/gsea/msigdb/cards/GO_MORPHOGENESIS_OF_AN_EPITHELIUM
GO_bp	GO_NEURON_PROJECTION_MORPHOGENESIS	402	3	0.0699727	0.381111	NTN1:MAPK1:EPHB3	http://www.broadinstitute.org/gsea/msigdb/cards/GO_NEURON_PROJECTION_MORPHOGENESIS
GO_bp	GO_MEMBRANE_LIPID_METABOLIC_PROCESS	184	2	0.0704511	0.381111	DEGS1:VAPA	http://www.broadinstitute.org/gsea/msigdb/cards/GO_MEMBRANE_LIPID_METABOLIC_PROCESS
GO_bp	GO_REGULATION_OF_EXOCYTOSIS	184	2	0.0704511	0.381111	LLGL2:NAPA	http://www.broadinstitute.org/gsea/msigdb/cards/GO_REGULATION_OF_EXOCYTOSIS
GO_bp	GO_SIGNAL_TRANSDUCTION_BY_PROTEIN_PHOSPHORYLATION	404	3	0.0707925	0.381111	ITPKB:GPS2:MAPK1	http://www.broadinstitute.org/gsea/msigdb/cards/GO_SIGNAL_TRANSDUCTION_BY_PROTEIN_PHOSPHORYLATION
GO_bp	GO_POSITIVE_REGULATION_OF_CELLULAR_COMPONENT_BIOGENESIS	406	3	0.0716166	0.38508	ADNP:EPHB3:JMY	http://www.broadinstitute.org/gsea/msigdb/cards/GO_POSITIVE_REGULATION_OF_CELLULAR_COMPONENT_BIOGENESIS
GO_bp	GO_PEPTIDYL_TYROSINE_MODIFICATION	186	2	0.0717813	0.385499	EPHB3:CUX1	http://www.broadinstitute.org/gsea/msigdb/cards/GO_PEPTIDYL_TYROSINE_MODIFICATION
GO_cc	GO_AXON	418	4	0.0173631	0.387331	HIF1A:NAPA:ADNP:MAPK1	http://www.broadinstitute.org/gsea/msigdb/cards/GO_AXON
GO_bp	GO_CELLULAR_RESPONSE_TO_EXTRACELLULAR_STIMULUS	188	2	0.0731197	0.387989	ADNP:KLF10	http://www.broadinstitute.org/gsea/msigdb/cards/GO_CELLULAR_RESPONSE_TO_EXTRACELLULAR_STIMULUS
GO_bp	GO_RESPONSE_TO_RADIATION	413	3	0.0745353	0.392864	HIF1A:ZBTB1:BLM	http://www.broadinstitute.org/gsea/msigdb/cards/GO_RESPONSE_TO_RADIATION
GO_bp	GO_LEUKOCYTE_ACTIVATION	413	3	0.0745353	0.392864	ITPKB:ZBTB1:CBFB	http://www.broadinstitute.org/gsea/msigdb/cards/GO_LEUKOCYTE_ACTIVATION
GO_bp	GO_PROTEIN_AUTOPHOSPHORYLATION	192	2	0.0758206	0.395694	PIM3:EPHB3	http://www.broadinstitute.org/gsea/msigdb/cards/GO_PROTEIN_AUTOPHOSPHORYLATION
GO_bp	GO_REGULATION_OF_NEURON_APOPTOTIC_PROCESS	192	2	0.0758206	0.395694	HIF1A:ADNP	http://www.broadinstitute.org/gsea/msigdb/cards/GO_REGULATION_OF_NEURON_APOPTOTIC_PROCESS
GO_bp	GO_DEVELOPMENTAL_MATURATION	193	2	0.0765007	0.396815	HIF1A:CBFB	http://www.broadinstitute.org/gsea/msigdb/cards/GO_DEVELOPMENTAL_MATURATION
GO_bp	GO_ANTERIOR_POSTERIOR_PATTERN_SPECIFICATION	194	2	0.0771829	0.396815	SKI:HEY2	http://www.broadinstitute.org/gsea/msigdb/cards/GO_ANTERIOR_POSTERIOR_PATTERN_SPECIFICATION
GO_bp	GO_CONNECTIVE_TISSUE_DEVELOPMENT	194	2	0.0771829	0.396815	HIF1A:CHSY1	http://www.broadinstitute.org/gsea/msigdb/cards/GO_CONNECTIVE_TISSUE_DEVELOPMENT
GO_bp	GO_POSITIVE_REGULATION_OF_LOCOMOTION	420	3	0.0775064	0.397478	HIF1A:NTN1:MAPK1	http://www.broadinstitute.org/gsea/msigdb/cards/GO_POSITIVE_REGULATION_OF_LOCOMOTION
GO_bp	GO_ION_TRANSPORT	1260	6	0.0776035	0.397516	KCNK4:SLC25A10:SLC25A10:PPARA:ACSL1:SLC12A2:LRRC26	http://www.broadinstitute.org/gsea/msigdb/cards/GO_ION_TRANSPORT
GO_bp	GO_NEGATIVE_REGULATION_OF_CELLULAR_COMPONENT_ORGANIZATION	683	4	0.0785055	0.401673	SKI:RCC2:NTN1:HEY2	http://www.broadinstitute.org/gsea/msigdb/cards/GO_NEGATIVE_REGULATION_OF_CELLULAR_COMPONENT_ORGANIZATION
GO_bp	GO_SYNAPTIC_SIGNALING	423	3	0.0787957	0.402693	GSK3A:NAPA:MAPK1	http://www.broadinstitute.org/gsea/msigdb/cards/GO_SYNAPTIC_SIGNALING
GO_bp	GO_RESPIRATORY_SYSTEM_DEVELOPMENT	197	2	0.0792409	0.404038	SKI:MAPK1	http://www.broadinstitute.org/gsea/msigdb/cards/GO_RESPIRATORY_SYSTEM_DEVELOPMENT
GO_bp	GO_REGULATION_OF_STRESS_ACTIVATED_PROTEIN_KINASE_SIGNALING_CASCADE	197	2	0.0792409	0.404038	GPS2:MAPK1	http://www.broadinstitute.org/gsea/msigdb/cards/GO_REGULATION_OF_STRESS_ACTIVATED_PROTEIN_KINASE_SIGNALING_CASCADE
GO_bp	GO_MRNA_PROCESSING	425	3	0.0796604	0.404781	CDC73:ELAVL1:PUF60	http://www.broadinstitute.org/gsea/msigdb/cards/GO_MRNA_PROCESSING
GO_bp	GO_SKELETAL_SYSTEM_MORPHOGENESIS	200	2	0.0813161	0.40786	SKI:CHSY1	http://www.broadinstitute.org/gsea/msigdb/cards/GO_SKELETAL_SYSTEM_MORPHOGENESIS
GO_bp	GO_NEGATIVE_REGULATION_OF_CATABOLIC_PROCESS	202	2	0.082709	0.412298	GSK3A:PPARA	http://www.broadinstitute.org/gsea/msigdb/cards/GO_NEGATIVE_REGULATION_OF_CATABOLIC_PROCESS
GO_bp	GO_PROTEIN_OLIGOMERIZATION	432	3	0.0827198	0.412298	SKI:ZBTB1:BLM	http://www.broadinstitute.org/gsea/msigdb/cards/GO_PROTEIN_OLIGOMERIZATION
GO_cc	GO_POTASSIUM_CHANNEL_COMPLEX	90	2	0.0192995	0.414581	KCNK4:LRRC26	http://www.broadinstitute.org/gsea/msigdb/cards/GO_POTASSIUM_CHANNEL_COMPLEX
GO_cc	GO_CYTOSKELETAL_PART	1435	8	0.0200394	0.415102	SKI:RCC2:SORBS1:RASSF3:PPP4C:LLGL2:CAMSAP3:MAPK1	http://www.broadinstitute.org/gsea/msigdb/cards/GO_CYTOSKELETAL_PART
GO_bp	GO_NEGATIVE_REGULATION_OF_INTRACELLULAR_SIGNAL_TRANSDUCTION	436	3	0.0844907	0.415522	HIF1A:GPS2:GSK3A	http://www.broadinstitute.org/gsea/msigdb/cards/GO_NEGATIVE_REGULATION_OF_INTRACELLULAR_SIGNAL_TRANSDUCTION
GO_bp	GO_CHROMOSOME_ORGANIZATION	993	5	0.0860272	0.417981	RCC2:CDC73:ZBTB1:BLM:MSH3	http://www.broadinstitute.org/gsea/msigdb/cards/GO_CHROMOSOME_ORGANIZATION
GO_bp	GO_REGULATION_OF_TRANSMEMBRANE_RECEPTOR_PROTEIN_SERINE_THREONINE_KINASE_SIGNALING_PATHWAY	207	2	0.0862231	0.418475	SKI:BAMBI	http://www.broadinstitute.org/gsea/msigdb/cards/GO_REGULATION_OF_TRANSMEMBRANE_RECEPTOR_PROTEIN_SERINE_THREONINE_KINASE_SIGNALING_PATHWAY
GO_bp	GO_DNA_REPLICATION	208	2	0.0869314	0.421451	BLM:REV3L	http://www.broadinstitute.org/gsea/msigdb/cards/GO_DNA_REPLICATION
GO_bp	GO_SMALL_MOLECULE_BIOSYNTHETIC_PROCESS	442	3	0.0871775	0.422183	DEGS1:SLC25A10:SLC25A10:LHB	http://www.broadinstitute.org/gsea/msigdb/cards/GO_SMALL_MOLECULE_BIOSYNTHETIC_PROCESS
GO_bp	GO_DNA_RECOMBINATION	209	2	0.0876414	0.423627	BLM:MSH3	http://www.broadinstitute.org/gsea/msigdb/cards/GO_DNA_RECOMBINATION
GO_bp	GO_RESPONSE_TO_MECHANICAL_STIMULUS	210	2	0.0883531	0.424171	KCNK4:HIF1A	http://www.broadinstitute.org/gsea/msigdb/cards/GO_RESPONSE_TO_MECHANICAL_STIMULUS
GO_cc	GO_PML_BODY	97	2	0.0222001	0.425848	SKI:BLM	http://www.broadinstitute.org/gsea/msigdb/cards/GO_PML_BODY
GO_cc	GO_NUCLEAR_MATRIX	98	2	0.0226283	0.425848	SORBS1:BLM	http://www.broadinstitute.org/gsea/msigdb/cards/GO_NUCLEAR_MATRIX
GO_cc	GO_RNA_POLYMERASE_II_TRANSCRIPTION_FACTOR_COMPLEX	100	2	0.0234951	0.425848	HIF1A:TCF12	http://www.broadinstitute.org/gsea/msigdb/cards/GO_RNA_POLYMERASE_II_TRANSCRIPTION_FACTOR_COMPLEX
GO_bp	GO_GLYCEROLIPID_BIOSYNTHETIC_PROCESS	211	2	0.0890666	0.427135	AGPAT9:DGAT1	http://www.broadinstitute.org/gsea/msigdb/cards/GO_GLYCEROLIPID_BIOSYNTHETIC_PROCESS
GO_bp	GO_POSTTRANSCRIPTIONAL_REGULATION_OF_GENE_EXPRESSION	447	3	0.0894442	0.428482	PUM1:ELAVL1:MAPK1	http://www.broadinstitute.org/gsea/msigdb/cards/GO_POSTTRANSCRIPTIONAL_REGULATION_OF_GENE_EXPRESSION
GO_bp	GO_ACTIN_FILAMENT_BASED_PROCESS	448	3	0.0899005	0.428879	SORBS1:LLGL2:JMY	http://www.broadinstitute.org/gsea/msigdb/cards/GO_ACTIN_FILAMENT_BASED_PROCESS
GO_bp	GO_NEGATIVE_REGULATION_OF_CELL_CYCLE_PROCESS	214	2	0.0912175	0.432309	CDC73:BLM	http://www.broadinstitute.org/gsea/msigdb/cards/GO_NEGATIVE_REGULATION_OF_CELL_CYCLE_PROCESS
GO_bp	GO_POSITIVE_REGULATION_OF_HOMEOSTATIC_PROCESS	214	2	0.0912175	0.432309	HIF1A:MAPK1	http://www.broadinstitute.org/gsea/msigdb/cards/GO_POSITIVE_REGULATION_OF_HOMEOSTATIC_PROCESS
GO_mf	GO_TRANSCRIPTION_FACTOR_ACTIVITY_RNA_POLYMERASE_II_DISTAL_ENHANCER_SEQUENCE_SPECIFIC_BINDING	89	2	0.0188992	0.4338	HIF1A:ZFHX3	http://www.broadinstitute.org/gsea/msigdb/cards/GO_TRANSCRIPTION_FACTOR_ACTIVITY_RNA_POLYMERASE_II_DISTAL_ENHANCER_SEQUENCE_SPECIFIC_BINDING
GO_mf	GO_SYNTAXIN_BINDING	91	2	0.0197033	0.4338	LLGL2:NAPA	http://www.broadinstitute.org/gsea/msigdb/cards/GO_SYNTAXIN_BINDING
GO_mf	GO_RECEPTOR_SIGNALING_PROTEIN_SERINE_THREONINE_KINASE_ACTIVITY	92	2	0.0201107	0.4338	PPP4C:MAPK1	http://www.broadinstitute.org/gsea/msigdb/cards/GO_RECEPTOR_SIGNALING_PROTEIN_SERINE_THREONINE_KINASE_ACTIVITY
GO_mf	GO_SINGLE_STRANDED_DNA_BINDING	92	2	0.0201107	0.4338	BLM:MSH3	http://www.broadinstitute.org/gsea/msigdb/cards/GO_SINGLE_STRANDED_DNA_BINDING
GO_mf	GO_TRANSFERASE_ACTIVITY_TRANSFERRING_ACYL_GROUPS	244	3	0.0202216	0.4338	CHAC1:AGPAT9:DGAT1	http://www.broadinstitute.org/gsea/msigdb/cards/GO_TRANSFERASE_ACTIVITY_TRANSFERRING_ACYL_GROUPS
GO_bp	GO_CELLULAR_CATABOLIC_PROCESS	1319	6	0.0918162	0.434444	FBXL14:ANAPC11:RNF126:RPS15:GSK3A:ACSL1	http://www.broadinstitute.org/gsea/msigdb/cards/GO_CELLULAR_CATABOLIC_PROCESS
GO_bp	GO_ENERGY_DERIVATION_BY_OXIDATION_OF_ORGANIC_COMPOUNDS	217	2	0.0933837	0.437101	GSK3A:PANK2	http://www.broadinstitute.org/gsea/msigdb/cards/GO_ENERGY_DERIVATION_BY_OXIDATION_OF_ORGANIC_COMPOUNDS
GO_bp	GO_RESPONSE_TO_ESTROGEN	217	2	0.0933837	0.437101	HIF1A:MAPK1	http://www.broadinstitute.org/gsea/msigdb/cards/GO_RESPONSE_TO_ESTROGEN
GO_bp	GO_REGULATION_OF_MITOCHONDRION_ORGANIZATION	218	2	0.0941091	0.437101	HIF1A:GSK3A	http://www.broadinstitute.org/gsea/msigdb/cards/GO_REGULATION_OF_MITOCHONDRION_ORGANIZATION
GO_bp	GO_REGULATION_OF_CATABOLIC_PROCESS	730	4	0.0945575	0.437101	HIF1A:ANAPC11:GSK3A:PPARA	http://www.broadinstitute.org/gsea/msigdb/cards/GO_REGULATION_OF_CATABOLIC_PROCESS
GO_bp	GO_RESPONSE_TO_ABIOTIC_STIMULUS	1023	5	0.0946922	0.437101	KCNK4:HIF1A:ZBTB1:BLM:PPARA	http://www.broadinstitute.org/gsea/msigdb/cards/GO_RESPONSE_TO_ABIOTIC_STIMULUS
GO_bp	GO_REGULATION_OF_VESICLE_MEDIATED_TRANSPORT	460	3	0.0954528	0.438786	LLGL2:NAPA:MAPK1	http://www.broadinstitute.org/gsea/msigdb/cards/GO_REGULATION_OF_VESICLE_MEDIATED_TRANSPORT
GO_bp	GO_REGULATION_OF_PROTEIN_STABILITY	220	2	0.0955649	0.438786	CDC73:MAPK1	http://www.broadinstitute.org/gsea/msigdb/cards/GO_REGULATION_OF_PROTEIN_STABILITY
GO_bp	GO_CELLULAR_MODIFIED_AMINO_ACID_METABOLIC_PROCESS	220	2	0.0955649	0.438786	CHAC1:PANK2	http://www.broadinstitute.org/gsea/msigdb/cards/GO_CELLULAR_MODIFIED_AMINO_ACID_METABOLIC_PROCESS
GO_bp	GO_NEGATIVE_REGULATION_OF_CELL_ADHESION	221	2	0.0962952	0.438786	RCC2:PPARA	http://www.broadinstitute.org/gsea/msigdb/cards/GO_NEGATIVE_REGULATION_OF_CELL_ADHESION
GO_bp	GO_REGULATION_OF_HEART_CONTRACTION	221	2	0.0962952	0.438786	GSK3A:HEY2	http://www.broadinstitute.org/gsea/msigdb/cards/GO_REGULATION_OF_HEART_CONTRACTION
GO_cc	GO_ANCHORING_JUNCTION	489	4	0.0287777	0.439572	SORBS1:RPS15:CAMSAP3:MAPK1	http://www.broadinstitute.org/gsea/msigdb/cards/GO_ANCHORING_JUNCTION
GO_cc	GO_CYTOPLASMIC_REGION	287	3	0.0306906	0.439572	HIF1A:LLGL2:MAPK1	http://www.broadinstitute.org/gsea/msigdb/cards/GO_CYTOPLASMIC_REGION
GO_cc	GO_NUCLEAR_OUTER_MEMBRANE_ENDOPLASMIC_RETICULUM_MEMBRANE_NETWORK	1002	6	0.0313327	0.439572	DEGS1:IL15RA:VAPA:AGPAT9:ACSL1:DGAT1	http://www.broadinstitute.org/gsea/msigdb/cards/GO_NUCLEAR_OUTER_MEMBRANE_ENDOPLASMIC_RETICULUM_MEMBRANE_NETWORK
GO_cc	GO_RNA_POLYMERASE_COMPLEX	121	2	0.0333847	0.439572	CDC73:POLR3E	http://www.broadinstitute.org/gsea/msigdb/cards/GO_RNA_POLYMERASE_COMPLEX
GO_cc	GO_NUCLEAR_PERIPHERY	121	2	0.0333847	0.439572	SORBS1:BLM	http://www.broadinstitute.org/gsea/msigdb/cards/GO_NUCLEAR_PERIPHERY
GO_cc	GO_NUCLEAR_TRANSCRIPTION_FACTOR_COMPLEX	125	2	0.035424	0.439572	HIF1A:TCF12	http://www.broadinstitute.org/gsea/msigdb/cards/GO_NUCLEAR_TRANSCRIPTION_FACTOR_COMPLEX
GO_cc	GO_ORGANELLE_SUBCOMPARTMENT	308	3	0.0366601	0.439572	CHAC1:CHSY1:CLTB	http://www.broadinstitute.org/gsea/msigdb/cards/GO_ORGANELLE_SUBCOMPARTMENT
GO_bp	GO_TAXIS	464	3	0.0973345	0.441037	NTN1:MAPK1:EPHB3	http://www.broadinstitute.org/gsea/msigdb/cards/GO_TAXIS
GO_mf	GO_PROTEIN_SERINE_THREONINE_KINASE_ACTIVITY	444	4	0.0211354	0.442861	PPP4C:GSK3A:MAPK1:PIM3	http://www.broadinstitute.org/gsea/msigdb/cards/GO_PROTEIN_SERINE_THREONINE_KINASE_ACTIVITY
GO_cc	GO_MITOCHONDRION	1633	8	0.0389473	0.448209	DEGS1:MACROD1:SLC25A10:SLC25A10:GPX4:GSK3A:PANK2:MAPK1:ACSL1	http://www.broadinstitute.org/gsea/msigdb/cards/GO_MITOCHONDRION
GO_bp	GO_CELL_FATE_COMMITMENT	227	2	0.100711	0.45122	CDC73:HEY2	http://www.broadinstitute.org/gsea/msigdb/cards/GO_CELL_FATE_COMMITMENT
GO_bp	GO_MULTICELLULAR_ORGANISM_REPRODUCTION	747	4	0.100721	0.45122	PUM1:HIF1A:PANK2:ADNP	http://www.broadinstitute.org/gsea/msigdb/cards/GO_MULTICELLULAR_ORGANISM_REPRODUCTION
GO_bp	GO_REGULATION_OF_VASCULATURE_DEVELOPMENT	233	2	0.105182	0.463196	HIF1A:HEY2	http://www.broadinstitute.org/gsea/msigdb/cards/GO_REGULATION_OF_VASCULATURE_DEVELOPMENT
GO_bp	GO_REGULATION_OF_I_KAPPAB_KINASE_NF_KAPPAB_SIGNALING	233	2	0.105182	0.463196	VAPA:CXXC5	http://www.broadinstitute.org/gsea/msigdb/cards/GO_REGULATION_OF_I_KAPPAB_KINASE_NF_KAPPAB_SIGNALING
GO_bp	GO_RESPONSE_TO_ENDOPLASMIC_RETICULUM_STRESS	233	2	0.105182	0.463196	CHAC1:GSK3A	http://www.broadinstitute.org/gsea/msigdb/cards/GO_RESPONSE_TO_ENDOPLASMIC_RETICULUM_STRESS
GO_bp	GO_ORGANIC_HYDROXY_COMPOUND_METABOLIC_PROCESS	482	3	0.105988	0.465967	ITPKB:HIF1A:DGAT1	http://www.broadinstitute.org/gsea/msigdb/cards/GO_ORGANIC_HYDROXY_COMPOUND_METABOLIC_PROCESS
GO_bp	GO_MUSCLE_CELL_DIFFERENTIATION	236	2	0.107438	0.468168	SKI:HEY2	http://www.broadinstitute.org/gsea/msigdb/cards/GO_MUSCLE_CELL_DIFFERENTIATION
GO_bp	GO_REGULATION_OF_CANONICAL_WNT_SIGNALING_PATHWAY	236	2	0.107438	0.468168	BAMBI:GSK3A	http://www.broadinstitute.org/gsea/msigdb/cards/GO_REGULATION_OF_CANONICAL_WNT_SIGNALING_PATHWAY
GO_mf	GO_CORE_PROMOTER_SEQUENCE_SPECIFIC_DNA_BINDING	101	2	0.0239335	0.470507	ZFHX3:KLF10	http://www.broadinstitute.org/gsea/msigdb/cards/GO_CORE_PROMOTER_SEQUENCE_SPECIFIC_DNA_BINDING
GO_mf	GO_RNA_POLYMERASE_II_TRANSCRIPTION_FACTOR_BINDING	104	2	0.0252689	0.470507	PPARA:HEY2	http://www.broadinstitute.org/gsea/msigdb/cards/GO_RNA_POLYMERASE_II_TRANSCRIPTION_FACTOR_BINDING
GO_mf	GO_HISTONE_DEACETYLASE_BINDING	105	2	0.0257207	0.470507	HIF1A:HEY2	http://www.broadinstitute.org/gsea/msigdb/cards/GO_HISTONE_DEACETYLASE_BINDING
GO_mf	GO_STRUCTURE_SPECIFIC_DNA_BINDING	118	2	0.0318868	0.470507	BLM:MSH3	http://www.broadinstitute.org/gsea/msigdb/cards/GO_STRUCTURE_SPECIFIC_DNA_BINDING
GO_mf	GO_TRANSCRIPTION_COACTIVATOR_ACTIVITY	295	3	0.0328989	0.470507	CBFB:JMY:SP4	http://www.broadinstitute.org/gsea/msigdb/cards/GO_TRANSCRIPTION_COACTIVATOR_ACTIVITY
GO_bp	GO_POSITIVE_REGULATION_OF_CELL_CELL_ADHESION	238	2	0.108949	0.472886	ITPKB:ZBTB1	http://www.broadinstitute.org/gsea/msigdb/cards/GO_POSITIVE_REGULATION_OF_CELL_CELL_ADHESION
GO_bp	GO_REGULATION_OF_CELLULAR_COMPONENT_MOVEMENT	771	4	0.109735	0.473524	RCC2:HIF1A:NTN1:MAPK1	http://www.broadinstitute.org/gsea/msigdb/cards/GO_REGULATION_OF_CELLULAR_COMPONENT_MOVEMENT
GO_cc	GO_CHROMOSOMAL_REGION	330	3	0.0435065	0.476109	RCC2:CDC73:BLM	http://www.broadinstitute.org/gsea/msigdb/cards/GO_CHROMOSOMAL_REGION
GO_bp	GO_REGULATION_OF_MICROTUBULE_BASED_PROCESS	243	2	0.112752	0.480762	RCC2:CAMSAP3	http://www.broadinstitute.org/gsea/msigdb/cards/GO_REGULATION_OF_MICROTUBULE_BASED_PROCESS
GO_bp	GO_RESPONSE_TO_STEROID_HORMONE	496	3	0.112921	0.480762	HIF1A:MAPK1:PPARA	http://www.broadinstitute.org/gsea/msigdb/cards/GO_RESPONSE_TO_STEROID_HORMONE
GO_bp	GO_ORGANELLE_FISSION	496	3	0.112921	0.480762	RCC2:ANAPC11:MSH3	http://www.broadinstitute.org/gsea/msigdb/cards/GO_ORGANELLE_FISSION
GO_mf	GO_NUCLEOTIDYLTRANSFERASE_ACTIVITY	125	2	0.035424	0.483329	POLR3E:REV3L	http://www.broadinstitute.org/gsea/msigdb/cards/GO_NUCLEOTIDYLTRANSFERASE_ACTIVITY
GO_mf	GO_SNARE_BINDING	126	2	0.0359412	0.483329	LLGL2:NAPA	http://www.broadinstitute.org/gsea/msigdb/cards/GO_SNARE_BINDING
GO_bp	GO_POSITIVE_REGULATION_OF_CELL_CYCLE_PROCESS	247	2	0.115819	0.486527	RCC2:ANAPC11	http://www.broadinstitute.org/gsea/msigdb/cards/GO_POSITIVE_REGULATION_OF_CELL_CYCLE_PROCESS
GO_mf	GO_TRANSCRIPTION_FACTOR_ACTIVITY_RNA_POLYMERASE_II_TRANSCRIPTION_FACTOR_BINDING	133	2	0.039643	0.488832	HIF1A:PPARA	http://www.broadinstitute.org/gsea/msigdb/cards/GO_TRANSCRIPTION_FACTOR_ACTIVITY_RNA_POLYMERASE_II_TRANSCRIPTION_FACTOR_BINDING
GO_mf	GO_NUCLEOSIDE_TRIPHOSPHATASE_REGULATOR_ACTIVITY	328	3	0.0428593	0.488832	SYDE2:GPS2:LLGL2	http://www.broadinstitute.org/gsea/msigdb/cards/GO_NUCLEOSIDE_TRIPHOSPHATASE_REGULATOR_ACTIVITY
GO_bp	GO_PROTEIN_HOMOOLIGOMERIZATION	248	2	0.116589	0.489299	SKI:ZBTB1	http://www.broadinstitute.org/gsea/msigdb/cards/GO_PROTEIN_HOMOOLIGOMERIZATION
GO_bp	GO_REGULATION_OF_AUTOPHAGY	249	2	0.11736	0.492071	HIF1A:GSK3A	http://www.broadinstitute.org/gsea/msigdb/cards/GO_REGULATION_OF_AUTOPHAGY
GO_bp	GO_ENDOCYTOSIS	507	3	0.118488	0.493997	FCHO1:MAPK1:CLTB	http://www.broadinstitute.org/gsea/msigdb/cards/GO_ENDOCYTOSIS
GO_bp	GO_REGULATION_OF_SYSTEM_PROCESS	507	3	0.118488	0.493997	HIF1A:GSK3A:HEY2	http://www.broadinstitute.org/gsea/msigdb/cards/GO_REGULATION_OF_SYSTEM_PROCESS
GO_bp	GO_ESTABLISHMENT_OF_PROTEIN_LOCALIZATION	1419	6	0.118927	0.495361	RCC2:RASD1:RPS15:NAPA:MAPK1:CLTB	http://www.broadinstitute.org/gsea/msigdb/cards/GO_ESTABLISHMENT_OF_PROTEIN_LOCALIZATION

## Sheet: Table S11. GWA  meta
Table S11. Association results of the meta-analysis loci. PheGenI information. Trait Related, single nucleotide polymorphism associated to the trait; context, location in the gene; Gene and Gene ID associated; location, genomic position; P-Value associated toSNP; Source, source of information; pubmed, pubmed number where the results are published
Trait	SNP rs	Context	Gene	Gene ID	Gene 2	Gene ID 2	Chromosome	Location	P-Value	Source	PubMed	Analysis ID	Study ID	Study Name	Population
gamma-Glutamyltransferase	2073398	intron	GGT1	2678	GGT1	2678	22	24603137	1e-109	NHGRI	22001757				South Asian|Asian|European
Interleukin-2 Receptor alpha Subunit	7911500	intergenic	IL15RA	3601	IL2RA	3559	10	5995763	1e-100	NHGRI	26293465				African|European|African American
Partial Thromboplastin Time	2545801	intergenic	F12	2161	GRK6	2870	5	177414338	6e-88	NHGRI	22703881				European
Lipoproteins	6073958	intergenic	PLTP	5360	PCIF1	63935	20	45923216	3e-55	NHGRI	27005778				European
Metabolism	6073958	intergenic	PLTP	5360	PCIF1	63935	20	45923216	3e-55	NHGRI	27005778				European
gamma-Glutamyltransferase	4820599	intron	GGT1	2678	GGT1	2678	22	24594246	7e-53	NHGRI	21909109				East Asian
Lipids	6065906	intergenic	PLTP	5360	PCIF1	63935	20	45925376	3e-49	NHGRI	19936222				European
Lipids	6065906	intergenic	PLTP	5360	PCIF1	63935	20	45925376	1e-45	NHGRI	19936222				European
Parkinson Disease	34311866	missense	TMEM175	84286	TMEM175	84286	4	958159	1e-43	NHGRI	25064009				European
Vascular Calcification	4810479	intergenic	PLTP	5360	PCIF1	63935	20	45916409	2e-42	NHGRI	22916037				European
Cholesterol, HDL	6065906	intergenic	PLTP	5360	PCIF1	63935	20	45925376	5e-40	NHGRI	24097068				European
Diabetes Mellitus, Type 1	3184504	missense	SH2B3	10019	SH2B3	10019	12	111446804	2e-38	NHGRI	21829393				European
Lipids	6065906	intergenic	PLTP	5360	PCIF1	63935	20	45925376	8e-37	NHGRI	19936222				European
Triglycerides	6065906	intergenic	PLTP	5360	PCIF1	63935	20	45925376	2e-34	NHGRI	24097068				European
Blood Pressure	639802	intergenic	RPL29P6	391019	HNRNPR	10236	1	23279508	3.91098e-32	dbGaP	17903302	1472	342	NHLBI Framingham SNP Health Association Resource (SHARe)	European
Cholesterol, HDL	838880	intergenic	MIR6880	102466204	SCARB1	949	12	124777047	6e-32	NHGRI	24097068				European
Lupus Erythematosus, Systemic	6932056	intergenic	TNFAIP3	7128	RPSAP42	100270919	6	137921300	2e-31	NHGRI	26502338				European
Varicose Veins	275715	intron	GPR176	11245	GPR176	11245	15	39820118	1.96751e-30	dbGaP	0	1414	342	NHLBI Framingham SNP Health Association Resource (SHARe)	European
Partial Thromboplastin Time	2731672	intergenic	F12	2161	GRK6	2870	5	177415473	2e-30	NHGRI	20303064				European
Inflammatory Bowel Diseases	8127691	intron	C21orf33	8209	C21orf33	8209	21	44194977	9e-30	NHGRI	26192919				European
Arthritis, Rheumatoid	7752903	intergenic	TNFAIP3	7128	RPSAP42	100270919	6	137906227	2e-29	NHGRI	24390342				East Asian|Asian|European
Cholesterol, HDL	6065906	intergenic	PLTP	5360	PCIF1	63935	20	45925376	5e-29	NHGRI	27286809				NR
Diabetes Mellitus, Type 1	3184504	missense	SH2B3	10019	SH2B3	10019	12	111446804	3e-27	NHGRI	19430480				NR
Platelet Count	3184504	missense	SH2B3	10019	SH2B3	10019	12	111446804	1e-26	NHGRI	22139419				European
Inflammatory Bowel Diseases	7282490	intron	C21orf33	8209	C21orf33	8209	21	44195858	2e-26	NHGRI	23128233				European
Metabolism	2731672	intergenic	F12	2161	GRK6	2870	5	177415473	6e-26	NHGRI	24816252				European
Blood Pressure	3184504	missense	SH2B3	10019	SH2B3	10019	12	111446804	4e-25	NHGRI	21909115				European
Crohn Disease	2024092	intron	SBNO2	22904	SBNO2	22904	19	1124032	7e-25	NHGRI	26192919				European
Blood Pressure	639802	intergenic	RPL29P6	391019	HNRNPR	10236	1	23279508	4.79998e-24	dbGaP	17903302	1470	342	NHLBI Framingham SNP Health Association Resource (SHARe)	European
Arterial Pressure	3184504	missense	SH2B3	10019	SH2B3	10019	12	111446804	1.62881e-23	dbGaP	0	4264	930	CHARGE (Cohorts for Heart and Aging Research in Genomic Epidemiology)	European|African American|Hispanic
Inflammatory Bowel Diseases	7282490	intron	C21orf33	8209	C21orf33	8209	21	44195858	2e-23	NHGRI	28067908				European
Cholesterol, LDL	73001065	intron	MAU2	23383	MAU2	23383	19	19349732	3e-23	NHGRI	25961943				European
Crohn Disease	7282490	intron	C21orf33	8209	C21orf33	8209	21	44195858	6e-23	NHGRI	26192919				European
Cholesterol, HDL	6065906	intergenic	PLTP	5360	PCIF1	63935	20	45925376	2e-22	NHGRI	20686565				European
Blood Pressure	3184504	missense	SH2B3	10019	SH2B3	10019	12	111446804	4.43255e-22	dbGaP	0	4252	930	CHARGE (Cohorts for Heart and Aging Research in Genomic Epidemiology)	European|African American|Hispanic
Glucose	11708067	intron	ADCY5	111	ADCY5	111	3	123346931	7e-22	NHGRI	20081858				European
Crohn Disease	2024092	intron	SBNO2	22904	SBNO2	22904	19	1124032	8e-22	NHGRI	23128233				European
Inflammatory Bowel Diseases	6920220	intergenic	BTF3L4P3	391040	TNFAIP3	7128	6	137685367	1e-21	NHGRI	23128233				European
Blood Pressure	3184504	missense	SH2B3	10019	SH2B3	10019	12	111446804	1.28e-21	dbGaP	27618452	3923	585	International Consortium for Blood Pressure (ICBP)	European
Arterial Pressure	3184504	missense	SH2B3	10019	SH2B3	10019	12	111446804	3.8866e-21	dbGaP	0	4262	930	CHARGE (Cohorts for Heart and Aging Research in Genomic Epidemiology)	European
Triglycerides	6073958	intergenic	PLTP	5360	PCIF1	63935	20	45923216	9e-21	NHGRI	25961943				European
Crohn Disease	2024092	intron	SBNO2	22904	SBNO2	22904	19	1124032	1e-20	NHGRI	28067908				European
Arthritis, Rheumatoid	7752903	intergenic	TNFAIP3	7128	RPSAP42	100270919	6	137906227	2e-20	NHGRI	24390342				East Asian|Asian|European
Psoriasis	240993	intron	REV3L	5980	REV3L	5980	6	111352511	5e-20	NHGRI	20953190				European
Birth Weight	9883204	intron	ADCY5	111	ADCY5	111	3	123377973	6e-20	NHGRI	23202124				European
gamma-Glutamyltransferase	5751902	intron	GGT1	2678	GGT1	2678	22	24600663	8e-20	NHGRI	20139978				East Asian
Blood Pressure	3184504	missense	SH2B3	10019	SH2B3	10019	12	111446804	9.31839e-20	dbGaP	0	4256	930	CHARGE (Cohorts for Heart and Aging Research in Genomic Epidemiology)	European|African American|Hispanic
Blood Pressure	3184504	missense	SH2B3	10019	SH2B3	10019	12	111446804	9.48582e-20	dbGaP	0	4250	930	CHARGE (Cohorts for Heart and Aging Research in Genomic Epidemiology)	European
Arthritis, Rheumatoid	5029924	nearGene-5	TNFAIP3	7128	TNFAIP3	7128	6	137866361	2e-19	NHGRI	27193031				European
Lupus Erythematosus, Systemic	5029924	nearGene-5	TNFAIP3	7128	TNFAIP3	7128	6	137866361	2e-19	NHGRI	27193031				European
Interleukin-1beta	7577696	intergenic	DPY30	84661	SPAST	6683	2	32053713	3e-19	NHGRI	24182552				European
Lupus Erythematosus, Systemic	58721818	intergenic	TNFAIP3	7128	RPSAP42	100270919	6	137922602	3e-19	NHGRI	26502338				European
White Matter	7214628	intergenic	TRIM47	91107	TRIM65	201292	17	75886067	3e-19	NHGRI	25663218				South Asian|East Asian|African|European|African American|Hispanic
Celiac Disease	2327832	intergenic	BTF3L4P3	391040	TNFAIP3	7128	6	137651931	4e-19	NHGRI	20190752				European
Heart Rate	867400	intergenic	TBK1	29110	RASSF3	283349	12	64583070	5e-19	NHGRI	27798624				Asian|African|European|Mixed
Platelet Count	739496	UTR-3	SH2B3	10019	SH2B3	10019	12	111449855	5e-19	NHGRI	20139978				East Asian
White Matter	7214628	intergenic	TRIM47	91107	TRIM65	201292	17	75886067	5e-19	NHGRI	25663218				South Asian|East Asian|African|European|African American|Hispanic
Eosinophils	3184504	missense	SH2B3	10019	SH2B3	10019	12	111446804	7e-19	NHGRI	19198610				East Asian|Asian|European
Cholesterol, LDL	10496665	intergenic	AMMECR1L	83607	SAP130	79595	2	127910983	8.14045e-19	dbGaP	17903299	584	342	NHLBI Framingham SNP Health Association Resource (SHARe)	European
Inflammatory Bowel Diseases	2024092	intron	SBNO2	22904	SBNO2	22904	19	1124032	1e-18	NHGRI	26192919				European
Cholesterol, HDL	838886	intron	SCARB1	949	SCARB1	949	12	124779741	2e-18	NHGRI	25961943				European
Crohn Disease	7282490	intron	C21orf33	8209	C21orf33	8209	21	44195858	2e-18	NHGRI	28067908				European
Triglycerides	8102280	intron	MAU2	23383	MAU2	23383	19	19344941	3e-18	NHGRI	26780889				Hispanic
Blood Pressure	3184504	missense	SH2B3	10019	SH2B3	10019	12	111446804	3.44893e-18	dbGaP	0	4254	930	CHARGE (Cohorts for Heart and Aging Research in Genomic Epidemiology)	European
Triglycerides	6065906	intergenic	PLTP	5360	PCIF1	63935	20	45925376	5e-18	NHGRI	20686565				European
Metabolism	3184504	missense	SH2B3	10019	SH2B3	10019	12	111446804	6e-18	NHGRI	24816252				European
Psoriasis	240993	intron	REV3L	5980	REV3L	5980	6	111352511	6e-18	NHGRI	25574825				European
Lupus Erythematosus, Systemic	2230926	missense	TNFAIP3	7128	TNFAIP3	7128	6	137874929	1e-17	NHGRI	19838193				East Asian
Aortic Aneurysm, Abdominal	58749629	intron	PCIF1	63935	PCIF1	63935	20	45942678	2e-17	NHGRI	27899403				European
Inflammatory Bowel Diseases	2024092	intron	SBNO2	22904	SBNO2	22904	19	1124032	5e-17	NHGRI	28067908				European
Psoriasis	610604	intron	TNFAIP3	7128	TNFAIP3	7128	6	137878280	5e-17	NHGRI	26626624				European
Lupus Erythematosus, Systemic	17321999	intron	LBH	81606	LBH	81606	2	30256991	2e-16	NHGRI	27399966				East Asian|European
Lupus Erythematosus, Systemic	2230926	missense	TNFAIP3	7128	TNFAIP3	7128	6	137874929	2e-16	NHGRI	27399966				East Asian|European
Psoriasis	458017	missense	REV3L	5980	REV3L	5980	6	111374888	2e-16	NHGRI	20953190				European
Atrial Fibrillation	2106261	intron	ZFHX3	463	ZFHX3	463	16	73017721	3e-16	NHGRI	22544366				European
Metabolism	2731672	intergenic	F12	2161	GRK6	2870	5	177415473	4e-16	NHGRI	27005778				European
Blood Pressure	924268	intergenic	PTPRU	10076	MATN1	4146	1	30555154	4.11124e-16	dbGaP	17903302	1418	342	NHLBI Framingham SNP Health Association Resource (SHARe)	European
Bone Density	11623869	intron	MARK3	4140	MARK3	4140	14	103417296	5e-16	NHGRI	22504420				East Asian|Asian|European
Heart Rate	2076028	intron	SUN2	25777	SUN2	25777	22	38754445	5e-16	NHGRI	27798624				Asian|African|European|Mixed
Glucose Tolerance Test	2877716	intron	ADCY5	111	ADCY5	111	3	123375604	7e-16	NHGRI	20081857				European
Psoriasis	643177	intron	TNFAIP3	7128	TNFAIP3	7128	6	137874556	9e-16	NHGRI	25574825				European
Atrial Fibrillation	2106261	intron	ZFHX3	463	ZFHX3	463	16	73017721	2e-15	NHGRI	19597492				NR
Metabolism	6900341	intron	REV3L	5980	REV3L	5980	6	111473206	4e-15	NHGRI	22286219				European
Metabolism	7822232	intergenic	GPAA1	8733	CYC1	1537	8	144090784	5e-15	NHGRI	24816252				European
Inflammatory Bowel Diseases	6933404	intergenic	BTF3L4P3	391040	TNFAIP3	7128	6	137638098	6e-15	NHGRI	26192919				European
Birth Weight	9883204	intron	ADCY5	111	ADCY5	111	3	123377973	7e-15	NHGRI	20372150				Oceania|African|Arab|European
Platelet Function Tests	10485614	intron	PTPN1	5770	PTPN1	5770	20	50516743	7.77156e-15	dbGaP	0	3448	375	Genome-Wide Association of Platelet Phenotypes	European
Parkinson Disease	11158026	intron	GCH1	2643	GCH1	2643	14	54882151	9e-15	NHGRI	27182965				European
Inflammatory Bowel Diseases	6920220	intergenic	BTF3L4P3	391040	TNFAIP3	7128	6	137685367	1e-14	NHGRI	26192919				European
Psoriasis	240993	intron	REV3L	5980	REV3L	5980	6	111352511	1e-14	NHGRI	25574825				European
Vascular Calcification	1851024	intergenic	GC	2638	NPFFR2	10886	4	71842104	1e-14	NHGRI	22916037				European
Crohn Disease	2838519	intron	C21orf33	8209	C21orf33	8209	21	44195140	2e-14	NHGRI	21102463				European
Diabetes Mellitus, Type 2	1845900	intron	UBE2E2	7325	UBE2E2	7325	3	23413074	2e-14	NHGRI	26818947				East Asian|European
Lupus Erythematosus, Systemic	2230926	missense	TNFAIP3	7128	TNFAIP3	7128	6	137874929	2e-14	NHGRI	26663301				East Asian
Blood Pressure	3184504	missense	SH2B3	10019	SH2B3	10019	12	111446804	2.33372e-14	dbGaP	0	3589	585	International Consortium for Blood Pressure (ICBP)	European
Blood Pressure	3184504	missense	SH2B3	10019	SH2B3	10019	12	111446804	3e-14	NHGRI	19430479				European
Cholesterol, HDL	838880	intergenic	MIR6880	102466204	SCARB1	949	12	124777047	3e-14	NHGRI	20686565				European
Vascular Calcification	2731672	intergenic	F12	2161	GRK6	2870	5	177415473	3e-14	NHGRI	22916037				European
Triglycerides	730084	intron	CHD7	55636	CHD7	55636	8	60738839	7.65111e-14	dbGaP	17903299	664	342	NHLBI Framingham SNP Health Association Resource (SHARe)	European
Lupus Erythematosus, Systemic	2230926	missense	TNFAIP3	7128	TNFAIP3	7128	6	137874929	1e-13	NHGRI	23273568				East Asian
Fibrinogen	7310615	intron	SH2B3	10019	SH2B3	10019	12	111427245	2e-13	NHGRI	26561523				European
Metabolism	2330809	intron	GGT1	2678	GGT1	2678	22	24606114	2e-13	NHGRI	24816252				European
Platelet Function Tests	3830104	intron	MYH9	4627	MYH9	4627	22	36312579	4.26548e-13	dbGaP	0	3448	375	Genome-Wide Association of Platelet Phenotypes	European
Partial Thromboplastin Time	2295888	intron	EDEM2	55741	EDEM2	55741	20	35135060	5e-13	NHGRI	22703881				European
Body Mass Index	1545552	intron	LTBP1	4052	LTBP1	4052	2	33135271	6e-13	NHGRI	25673412				European
Inflammatory Bowel Diseases	12103	intron	PUSL1	126789	PUSL1	126789	1	1312114	8e-13	NHGRI	23128233				European
Arthritis, Rheumatoid	6920220	intergenic	BTF3L4P3	391040	TNFAIP3	7128	6	137685367	9e-13	NHGRI	20453842				European
Lipoproteins	67053123	intergenic	SCARB1	949	UBC	7316	12	124869264	1e-12	NHGRI	27005778				European
Lupus Erythematosus, Systemic	2230926	missense	TNFAIP3	7128	TNFAIP3	7128	6	137874929	1e-12	NHGRI	27399966				East Asian|European
Metabolism	7760535	intron	REV3L	5980	REV3L	5980	6	111425880	1e-12	NHGRI	21886157				European
Metabolism	67053123	intergenic	SCARB1	949	UBC	7316	12	124869264	1e-12	NHGRI	27005778				European
Blood Pressure	639802	intergenic	RPL29P6	391019	HNRNPR	10236	1	23279508	1.40378e-12	dbGaP	17903302	1504	342	NHLBI Framingham SNP Health Association Resource (SHARe)	European
Insulin-Secreting Cells	11708067	intron	ADCY5	111	ADCY5	111	3	123346931	3e-12	NHGRI	20081858				European
Lupus Erythematosus, Systemic	5029939	intron	TNFAIP3	7128	TNFAIP3	7128	6	137874586	3e-12	NHGRI	19165918				European
Cholesterol, LDL	10496665	intergenic	AMMECR1L	83607	SAP130	79595	2	127910983	3.17461e-12	dbGaP	17903299	586	342	NHLBI Framingham SNP Health Association Resource (SHARe)	European
Parkinson Disease	6599388	intron	TMEM175	84286	TMEM175	84286	4	945299	4e-12	NHGRI	21292315				European
Bone Density	2887571	intergenic	LINC00942	100292680	FBXL14	144699	12	1529005	6e-12	NHGRI	22504420				East Asian|Asian|European
Psoriasis	582757	intron	TNFAIP3	7128	TNFAIP3	7128	6	137876687	6e-12	NHGRI	25574825				European
Platelet Count	739496	UTR-3	SH2B3	10019	SH2B3	10019	12	111449855	7e-12	NHGRI	25705162				East Asian
Crohn Disease	740495	intron	SBNO2	22904	SBNO2	22904	19	1124836	8e-12	NHGRI	21102463				European
Psoriasis	465969	intron	REV3L	5980	REV3L	5980	6	111334327	8e-12	NHGRI	25574825				European
Psoriasis	643177	intron	TNFAIP3	7128	TNFAIP3	7128	6	137874556	9e-12	NHGRI	25903422				East Asian|European
Psoriasis	610604	intron	TNFAIP3	7128	TNFAIP3	7128	6	137878280	9e-12	NHGRI	19169254				European
Mean Platelet Volume	11734132	intergenic	KIAA0232	9778	TBC1D14	57533	4	6889792	1e-11	NHGRI	22139419				European
Blood Pressure	10499197	intergenic	BTF3L4P3	391040	TNFAIP3	7128	6	137811379	1.10154e-11	dbGaP	17903302	1740	342	NHLBI Framingham SNP Health Association Resource (SHARe)	European
Cholesterol, HDL	4129767	intron	PGS1	9489	PGS1	9489	17	78407903	2e-11	NHGRI	24097068				European
Atrial Fibrillation	7190256	intron	ZFHX3	463	ZFHX3	463	16	72963084	3e-11	NHGRI	27790247				European
Blood Pressure	7190256	intron	ZFHX3	463	ZFHX3	463	16	72963084	3e-11	NHGRI	27790247				European
Body Mass Index	11231693	intron	MACROD1	28992	MACROD1	28992	11	64095140	3e-11	NHGRI	25673412				European
Body Mass Index	7190256	intron	ZFHX3	463	ZFHX3	463	16	72963084	3e-11	NHGRI	27790247				European
Cholesterol	7190256	intron	ZFHX3	463	ZFHX3	463	16	72963084	3e-11	NHGRI	27790247				European
Cholesterol, HDL	7190256	intron	ZFHX3	463	ZFHX3	463	16	72963084	3e-11	NHGRI	27790247				European
Coronary Disease	7190256	intron	ZFHX3	463	ZFHX3	463	16	72963084	3e-11	NHGRI	27790247				European
Diabetes Mellitus	7190256	intron	ZFHX3	463	ZFHX3	463	16	72963084	3e-11	NHGRI	27790247				European
Glucose	7190256	intron	ZFHX3	463	ZFHX3	463	16	72963084	3e-11	NHGRI	27790247				European
Heart Failure	7190256	intron	ZFHX3	463	ZFHX3	463	16	72963084	3e-11	NHGRI	27790247				European
Inflammatory Bowel Diseases	12103	intron	PUSL1	126789	PUSL1	126789	1	1312114	3e-11	NHGRI	26192919				European
Stroke	7190256	intron	ZFHX3	463	ZFHX3	463	16	72963084	3e-11	NHGRI	27790247				European
Triglycerides	7190256	intron	ZFHX3	463	ZFHX3	463	16	72963084	3e-11	NHGRI	27790247				European
Waist-Hip Ratio	11231693	intron	MACROD1	28992	MACROD1	28992	11	64095140	3e-11	NHGRI	25673412				European
Cardiovascular Diseases	10518048	intron	ZFHX3	463	ZFHX3	463	16	72946841	3.0823e-11	dbGaP	17903304	1342	342	NHLBI Framingham SNP Health Association Resource (SHARe)	European
gamma-Glutamyltransferase	4820599	intron	GGT1	2678	GGT1	2678	22	24594246	4e-11	NHGRI	18940312				European
Arterial Pressure	3184504	missense	SH2B3	10019	SH2B3	10019	12	111446804	4.25141e-11	dbGaP	0	3591	585	International Consortium for Blood Pressure (ICBP)	European
Platelet Count	3184504	missense	SH2B3	10019	SH2B3	10019	12	111446804	5e-11	NHGRI	24026423				European
Parkinson Disease	11158026	intron	GCH1	2643	GCH1	2643	14	54882151	6e-11	NHGRI	25064009				European
Blood Pressure	10499197	intergenic	BTF3L4P3	391040	TNFAIP3	7128	6	137811379	6.90299e-11	dbGaP	17903302	1708	342	NHLBI Framingham SNP Health Association Resource (SHARe)	European
Arthritis, Rheumatoid	7752903	intergenic	TNFAIP3	7128	RPSAP42	100270919	6	137906227	7e-11	NHGRI	24390342				East Asian|Asian|European
Triglycerides	7679	UTR-3	PCIF1	63935	PCIF1	63935	20	45947863	7e-11	NHGRI	19060906				European
Psoriasis	610604	intron	TNFAIP3	7128	TNFAIP3	7128	6	137878280	8e-11	NHGRI	26626624				European
Metabolism	2545801	intergenic	F12	2161	GRK6	2870	5	177414338	9e-11	NHGRI	22286219				European
Atrial Fibrillation	7193343	intron	ZFHX3	463	ZFHX3	463	16	72995261	1e-10	NHGRI	19597491				European
Dermatitis, Atopic	6602364	intergenic	IL15RA	3601	IL2RA	3559	10	5996890	1e-10	NHGRI	26482879				East Asian|African|European|African American|Hispanic
Fibrinogen	3184504	missense	SH2B3	10019	SH2B3	10019	12	111446804	1e-10	NHGRI	28107422				European
Platelet Count	3733606	UTR-3	KIAA0232	9778	KIAA0232	9778	4	6881285	1e-10	NHGRI	25705162				East Asian
Triglycerides	730084	intron	CHD7	55636	CHD7	55636	8	60738839	1.31407e-10	dbGaP	17903299	784	342	NHLBI Framingham SNP Health Association Resource (SHARe)	European
Blood Pressure	924268	intergenic	PTPRU	10076	MATN1	4146	1	30555154	1.71661e-10	dbGaP	17903302	1442	342	NHLBI Framingham SNP Health Association Resource (SHARe)	European
Blood Pressure	3184504	missense	SH2B3	10019	SH2B3	10019	12	111446804	2e-10	NHGRI	26390057				South Asian|East Asian|Asian|European
Embolism	7193343	intron	ZFHX3	463	ZFHX3	463	16	72995261	2e-10	NHGRI	26708676				East Asian|Asian|African|European|Hispanic
Interleukin-2 Receptor alpha Subunit	8177757	intergenic	IL15RA	3601	IL2RA	3559	10	5985758	2e-10	NHGRI	26293465				African|European|African American
Stroke	7193343	intron	ZFHX3	463	ZFHX3	463	16	72995261	2e-10	NHGRI	26708676				East Asian|Asian|African|European|Hispanic
Triglycerides	730084	intron	CHD7	55636	CHD7	55636	8	60738839	2.83014e-10	dbGaP	17903299	660	342	NHLBI Framingham SNP Health Association Resource (SHARe)	European
Body Mass Index	11708067	intron	ADCY5	111	ADCY5	111	3	123346931	3e-10	NHGRI	22581228				European
Glucose	11708067	intron	ADCY5	111	ADCY5	111	3	123346931	3e-10	NHGRI	22581228				European
Blood Pressure	924268	intergenic	PTPRU	10076	MATN1	4146	1	30555154	4.4548e-10	dbGaP	17903302	1438	342	NHLBI Framingham SNP Health Association Resource (SHARe)	European
Atrial Fibrillation	7190256	intron	ZFHX3	463	ZFHX3	463	16	72963084	5e-10	NHGRI	27790247				European
Coronary Disease	7190256	intron	ZFHX3	463	ZFHX3	463	16	72963084	5e-10	NHGRI	27790247				European
Diabetes Mellitus	7190256	intron	ZFHX3	463	ZFHX3	463	16	72963084	5e-10	NHGRI	27790247				European
Heart Failure	7190256	intron	ZFHX3	463	ZFHX3	463	16	72963084	5e-10	NHGRI	27790247				European
Psoriasis	643177	intron	TNFAIP3	7128	TNFAIP3	7128	6	137874556	5e-10	NHGRI	25903422				East Asian|European
Stroke	7190256	intron	ZFHX3	463	ZFHX3	463	16	72963084	5e-10	NHGRI	27790247				European
Body Mass Index	11231693	intron	MACROD1	28992	MACROD1	28992	11	64095140	6e-10	NHGRI	25673412				European
Waist-Hip Ratio	11231693	intron	MACROD1	28992	MACROD1	28992	11	64095140	6e-10	NHGRI	25673412				European
Cholesterol, HDL	72634501	intron	MACF1	23499	MACF1	23499	1	39085816	8e-10	NHGRI	25961943				European
Stroke	12425791	intergenic	NINJ2	4815	WNK1	65125	12	674318	8e-10	NHGRI	19369658				African|African American|European
Arthritis, Rheumatoid	10499194	intergenic	BTF3L4P3	391040	TNFAIP3	7128	6	137681500	1e-09	NHGRI	17982456				European
Arthritis, Rheumatoid	10175798	intergenic	YPEL5	51646	LBH	81606	2	30226728	1e-09	NHGRI	24390342				East Asian|Asian|European
Coronary Artery Disease	3184504	missense	SH2B3	10019	SH2B3	10019	12	111446804	1e-09	NHGRI	26343387				South Asian|East Asian|Asian|Arab|African|European|African American|Hispanic
Crohn Disease	762421	intron	C21orf33	8209	C21orf33	8209	21	44195678	1e-09	NHGRI	18587394				European
Diabetes Mellitus, Type 2	896854	intron	TP53INP1	94241	TP53INP1	94241	8	94948283	1e-09	NHGRI	20581827				European
Inflammatory Bowel Diseases	3184504	missense	SH2B3	10019	SH2B3	10019	12	111446804	1e-09	NHGRI	26192919				European
Lupus Erythematosus, Systemic	9782955	intron	LYST	1130	LYST	1130	1	235876577	1e-09	NHGRI	26502338				European
Lupus Erythematosus, Systemic	7579944	intergenic	YPEL5	51646	LBH	81606	2	30222160	1e-09	NHGRI	27399966				East Asian|European
Stroke	12425791	intergenic	NINJ2	4815	WNK1	65125	12	674318	1e-09	NHGRI	19369658				African|African American|European
Platelet Function Tests	9807392	UTR-3	VAPA	9218	VAPA	9218	18	9959121	1.00297e-09	dbGaP	0	3372	375	Genome-Wide Association of Platelet Phenotypes	European
Cardiovascular Diseases	10518048	intron	ZFHX3	463	ZFHX3	463	16	72946841	1.77071e-09	dbGaP	17903304	1344	342	NHLBI Framingham SNP Health Association Resource (SHARe)	European
Adipose Tissue	2069126	intron	RIN2	54453	RIN2	54453	20	19769313	2e-09	NHGRI	28224759				European
Arthritis, Rheumatoid	6920220	intergenic	BTF3L4P3	391040	TNFAIP3	7128	6	137685367	2e-09	NHGRI	18794853				European
Lupus Erythematosus, Systemic	10499197	intergenic	BTF3L4P3	391040	TNFAIP3	7128	6	137811379	2e-09	NHGRI	23740937				European
Lupus Erythematosus, Systemic	17321999	intron	LBH	81606	LBH	81606	2	30256991	2e-09	NHGRI	27399966				East Asian|European
Stroke	12425791	intergenic	NINJ2	4815	WNK1	65125	12	674318	2e-09	NHGRI	19369658				African|African American|European
Cholesterol, HDL	3104435	intergenic	PTPRU	10076	MATN1	4146	1	30572662	3e-09	NHGRI	26879886				Arab
Cardiovascular Diseases	10518048	intron	ZFHX3	463	ZFHX3	463	16	72946841	3.16864e-09	dbGaP	17903304	1358	342	NHLBI Framingham SNP Health Association Resource (SHARe)	European
Osteoporosis	10494675	intron	CDC73	79577	CDC73	79577	1	193181743	3.50651e-09	dbGaP	17903295	1788	342	NHLBI Framingham SNP Health Association Resource (SHARe)	European
Blood Pressure	10486744	intergenic	TCP1P1	647047	C7orf25	79020	7	42854955	3.9483e-09	dbGaP	17903302	1750	342	NHLBI Framingham SNP Health Association Resource (SHARe)	European
Cholesterol, HDL	7679	UTR-3	PCIF1	63935	PCIF1	63935	20	45947863	4e-09	NHGRI	19060906				European
Waist Circumference	3809128	UTR-5	CNPY2	10330	CNPY2	10330	12	56316135	4e-09	NHGRI	26785701				East Asian|Asian
Blood Pressure	3184504	missense	SH2B3	10019	SH2B3	10019	12	111446804	5e-09	NHGRI	19430479				European
Cholesterol, HDL	4129767	intron	PGS1	9489	PGS1	9489	17	78407903	5e-09	NHGRI	20686565				European
Multiple Sclerosis	2283792	intron	MAPK1	5594	MAPK1	5594	22	21776836	5e-09	NHGRI	21833088				European
Osteoporosis	10494675	intron	CDC73	79577	CDC73	79577	1	193181743	5.02083e-09	dbGaP	17903295	1792	342	NHLBI Framingham SNP Health Association Resource (SHARe)	European
Hypertension	3184504	missense	SH2B3	10019	SH2B3	10019	12	111446804	5.62951e-09	dbGaP	0	4260	930	CHARGE (Cohorts for Heart and Aging Research in Genomic Epidemiology)	European|African American|Hispanic
Cytokines	6576443	intergenic	UBE3A	7337	ATP10A	57194	15	25649511	6e-09	NHGRI	22610502				African|European|African American
Platelet Function Tests	16837344	intron	PARD3B	117583	PARD3B	117583	2	205438226	6.59999e-09	dbGaP	0	3351	375	Genome-Wide Association of Platelet Phenotypes	European
Arthritis, Rheumatoid	10774624	intergenic	HSPA8P14	642580	SH2B3	10019	12	111395984	7e-09	NHGRI	24390342				East Asian|Asian|European
Diabetes Mellitus, Type 2	7612463	intron	UBE2E2	7325	UBE2E2	7325	3	23294959	7e-09	NHGRI	24509480				South Asian|East Asian|Asian|European|Hispanic
Body Mass Index	1545552	intron	LTBP1	4052	LTBP1	4052	2	33135271	8e-09	NHGRI	25673412				European
Body Weight	730084	intron	CHD7	55636	CHD7	55636	8	60738839	8.08589e-09	dbGaP	17903300	372	342	NHLBI Framingham SNP Health Association Resource (SHARe)	European
Cardiovascular Diseases	10511321	intergenic	C3orf17	25871	BOC	91653	3	113194658	8.45131e-09	dbGaP	17903304	1346	342	NHLBI Framingham SNP Health Association Resource (SHARe)	European
Heart Rate	6893300	intron	CANX	821	CANX	821	5	179708814	9e-09	NHGRI	24680774				European
Blood Pressure	10486744	intergenic	TCP1P1	647047	C7orf25	79020	7	42854955	9.77196e-09	dbGaP	17903302	1738	342	NHLBI Framingham SNP Health Association Resource (SHARe)	European
Body Mass Index	6715793	intron	LTBP1	4052	LTBP1	4052	2	33154196	1e-08	NHGRI	25673412				European
Cholesterol	4253772	intron	PPARA	5465	PPARA	5465	22	46231706	1e-08	NHGRI	24097068				European
Circadian Rhythm	11545787	UTR-3	RASD1	51655	RASD1	51655	17	17494964	1e-08	NHGRI	26835600				European
Fibrinogen	7588285	intron	COLEC11	78989	COLEC11	78989	2	3600596	1e-08	NHGRI	26561523				European
Inflammatory Bowel Diseases	6920220	intergenic	BTF3L4P3	391040	TNFAIP3	7128	6	137685367	1e-08	NHGRI	28067908				European
Lupus Erythematosus, Systemic	17321999	intron	LBH	81606	LBH	81606	2	30256991	1e-08	NHGRI	27399966				East Asian|European
Multiple Sclerosis	13192841	intergenic	BTF3L4P3	391040	TNFAIP3	7128	6	137646077	1e-08	NHGRI	21833088				European
Psoriasis	240993	intron	REV3L	5980	REV3L	5980	6	111352511	1e-08	NHGRI	25903422				East Asian|European
Waist Circumference	6715793	intron	LTBP1	4052	LTBP1	4052	2	33154196	1e-08	NHGRI	25673412				European
Body Weight	275737	intron	GPR176	11245	GPR176	11245	15	39886812	1.02243e-08	dbGaP	17903300	372	342	NHLBI Framingham SNP Health Association Resource (SHARe)	European
Platelet Function Tests	16837344	intron	PARD3B	117583	PARD3B	117583	2	205438226	1.03629e-08	dbGaP	0	3349	375	Genome-Wide Association of Platelet Phenotypes	European
Platelet Function Tests	849243	intron	PARD3B	117583	PARD3B	117583	2	205430395	1.34412e-08	dbGaP	0	3351	375	Genome-Wide Association of Platelet Phenotypes	European
Platelet Function Tests	4871029	intron	DEPTOR	64798	DEPTOR	64798	8	119947377	1.4e-08	dbGaP	0	3321	375	Genome-Wide Association of Platelet Phenotypes	African American
Body Mass Index	275737	intron	GPR176	11245	GPR176	11245	15	39886812	1.52116e-08	dbGaP	17903300	352	342	NHLBI Framingham SNP Health Association Resource (SHARe)	European
Cholesterol, LDL	150268548	intergenic	MAU2	23383	GATAD2A	54815	19	19383674	2e-08	NHGRI	27002377				European
Diabetes Mellitus, Type 2	11717195	intron	ADCY5	111	ADCY5	111	3	123363551	2e-08	NHGRI	24509480				South Asian|East Asian|Asian|European|Hispanic
[truncated: 334 more rows]

## Sheet: Table S13. Atherotrombotic IS
Table S13. Atherotrombotic Stroke vs Controls analysis. CpG sites differentially methylated in relation to ischemic stroke. CpG id; Chr, chromosome location; genomic position; associated gene and observed mean β-values (standard deviation).
[truncated: 501 more rows]

[truncated: 11 more sheets: Table S14. Cardioembolic IS, TableS15. Small Vessel Disease , Table S16. Undetermined IS, Table S17. Functional LAA, Table S18. Functional CE, Table S19. Functional SVD, Table S20. Functional UND, Table S21. GWA-LAA, Table S22. GWA-CE, Table S23. GWA-SVD, Table S24. GWA-UND]
